# Supplementary material for: Identification of Altered Developmental Pathways in Human Juvenile HD iPSC With 71Q and 109Q Using Transcriptome Profiling
Source: Front Cell Neurosci. 2019 Jan 18;12:528. doi: 10.3389/fncel.2018.00528 (PMC6345698; doi:10.3389/fncel.2018.00528)
Supplement: Table S2 — Identifiers from the submitted list of dysregulated genes which were not mapped to distinct proteins in CPDB induced network modules analysis. [file Table_2.XLSX]

## Sheet: Arkusz1
Identifiers from the submitted list which were not mapped to distinct proteins in ConsensusPathDb
HD vs control	71Q vs control	109Q vs control
AC003973.3	AC003973.3	AACSP1
AC005276.1	AC004556.1	AC003973.3
AC009005.2	AC005276.1	AC005276.1
AC016582.2	AC009005.2	AC009005.2
AC034220.3	AC016582.2	AC011043.1
AC093818.1	AC022182.2	AC084082.3
C1ORF94	C1ORF216	AC093818.1
CCDC162P	CCDC162P	ASNSP1
CNTNAP3B	CNTNAP3B	C1ORF131
CRYGEP	CTD-2008L17.1	CDC20P1
CTD-2147F2.1	CTD-2245F17.3	CNTNAP3B
EFCAB13	EFCAB13	CRYGEP
FAM72C	FAM72C	CTD-2021H9.3
FAM86B3P	FAM86B3P	EIF2S3L
GNAS-AS1	FNBP1P1	FAM72C
KC6	GLDN	FAM86B1
LHFP	HEIH	FAM86B3P
LINC00649	HERC2P9	HIST3H2BA
LINC00960	KC6	HLA-F-AS1
OTOGL	LHFP	LINC00471
PAX8-AS1	LINC00491	LINC00649
PI15	LINC00540	LINC00865
PPP4R1L	LINC00649	LINC00960
RNASEH1-AS1	LINC01021	LINC01021
RP11-108M12.3	LINC01535	LINC01060
RP11-114H24.2	MIR205HG	MIR302C
RP11-276H19.2	MST1P2	MST1L
RP11-343H5.4	OTOGL	OTOGL
RP11-350D17.3	PCAT14	PAX8-AS1
RP11-358L22.3	PI15	PI15
RP11-632K20.7	RP1-228H13.5	PPP4R1L
RP11-78F17.1	RP11-108M12.3	RNU6-2
RPL13P12	RP11-114H24.2	RP1-34B20.21
SMIM24	RP11-129M6.1	RP11-108M12.3
SNHG7	RP11-22B23.1	RP11-114H24.2
SRP54-AS1	RP11-276M12.1	RP11-115D19.1
TAS2R64P	RP11-343H5.4	RP11-121L10.2
TRIM60P18	RP11-350D17.3	RP11-160E2.6
U1	RP11-415G4.1	RP11-230F18.5
ZNF728	RP11-498P14.5	RP11-276H19.2
	RP11-632K20.7	RP11-343H5.4
	RP11-68L18.1	RP11-350D17.3
	RP11-78F17.1	RP11-358L22.3
	RP11-867G2.6	RP11-366M4.11
	RPL13P12	RP11-390F4.6
	RPSAP58	RP11-438B23.2
	SNHG7	RP11-520B13.8
	TAS2R64P	RP11-632K20.7
	TPM3P9	RP11-78F17.1
	TRIM52-AS1	RP11-958N24.2
	U1	RP3-510D11.2
	VLDLR-AS1	RPL13P12
	ZNF728	SC22CB-1E7.1
		SLC2A1-AS1
		SMIM24
		TAS2R64P
		TMEM254-AS1
		TRIM60P18
		TSTD1
		U1
		ZDHHC11B
