# Supplementary material for: Identification of Altered Developmental Pathways in Human Juvenile HD iPSC With 71Q and 109Q Using Transcriptome Profiling
Source: Front Cell Neurosci. 2019 Jan 18;12:528. doi: 10.3389/fncel.2018.00528 (PMC6345698; doi:10.3389/fncel.2018.00528)
Supplement: Table S3 — Lists of transcripts obtained from RNA-seq analysis on 71Q and 109Q HD iPSC lines. Lists contain statistical values for three comparison groups, both HD lines vs. control, HD71Q vs. control, and HD109Q vs. control. [file Table_3.XLSX]

## Sheet: HDvsWT
	baseMean	log2FoldChange	lfcSE	stat	pvalue	padj	gene_name
ENSG00000277918	33975.1	6.25343	0.270951	23.0795	7.43623e-118	1.59976e-113	U1
ENSG00000255192	429.567	4.83959	0.42176	11.4747	1.76698e-30	1.90065e-26	NANOGP8
ENSG00000175548	366.744	3.41828	0.323509	10.5663	4.27205e-26	3.06349e-22	ALG10B
ENSG00000274276	284.713	-3.0969	0.315087	-9.82874	8.46736e-23	4.55396e-19	CBSL
ENSG00000165899	158.874	3.17097	0.348681	9.09418	9.53044e-20	4.10057e-16	OTOGL
ENSG00000185880	565.577	1.14036	0.133952	8.5132	1.69204e-17	6.0668e-14	TRIM69
ENSG00000154529	63.3617	-2.30097	0.334768	-6.87333	6.27213e-12	1.9276e-08	CNTNAP3B
ENSG00000256274	79.4092	1.89361	0.278712	6.79415	1.08955e-11	2.92995e-08	TAS2R64P
ENSG00000197462	322.008	4.24709	0.662489	6.41081	1.44751e-10	3.11404e-07	AC005276.1
ENSG00000263711	30.6958	22.0516	3.43533	6.41907	1.37109e-10	3.11404e-07	RP11-169F17.1
ENSG00000248874	18.4287	21.3623	3.43604	6.21711	5.06381e-10	9.84561e-07	C5orf17
ENSG00000271369	102.141	2.00386	0.322976	6.20436	5.4919e-10	9.84561e-07	RP11-350D17.3
ENSG00000263513	116.101	1.34875	0.223728	6.02855	1.65436e-09	2.73771e-06	FAM72C
ENSG00000162039	178.513	1.95042	0.324846	6.00413	1.92362e-09	2.95591e-06	MEIOB
ENSG00000237945	406.592	1.07453	0.180602	5.9497	2.68637e-09	3.85279e-06	LINC00649
ENSG00000125730	385.579	1.3479	0.231759	5.81596	6.02883e-09	8.10613e-06	C3
ENSG00000279377	349.41	11.455	2.06285	5.55301	2.80794e-08	3.55337e-05	AC003973.3
ENSG00000267751	123.232	1.29851	0.239929	5.41206	6.23029e-08	7.44624e-05	AC009005.2
ENSG00000120784	746.986	0.952712	0.176925	5.38484	7.25082e-08	7.79934e-05	ZFP30
ENSG00000263551	96.6456	1.58317	0.293582	5.3926	6.94438e-08	7.79934e-05	RP11-78F17.1
ENSG00000059378	347.232	0.870056	0.162457	5.35562	8.52655e-08	8.73484e-05	PARP12
ENSG00000158125	272.424	1.07354	0.202339	5.30565	1.1227e-07	0.000109785	XDH
ENSG00000160321	812.56	9.24821	1.74928	5.28687	1.24425e-07	0.000111532	ZNF208
ENSG00000197134	131.362	7.15877	1.35339	5.28951	1.22647e-07	0.000111532	ZNF257
ENSG00000224114	142.442	2.50202	0.478212	5.23204	1.67654e-07	0.000144269	RP11-343H5.4
ENSG00000143632	148.63	-2.64483	0.52211	-5.06566	4.06986e-07	0.000316863	ACTA1
ENSG00000215030	1140.19	-2.97827	0.588101	-5.06422	4.10084e-07	0.000316863	RPL13P12
ENSG00000260776	377.147	1.43794	0.284002	5.06314	4.12409e-07	0.000316863	RP11-114H24.2
ENSG00000213025	27.0848	-2.75597	0.557204	-4.94607	7.57266e-07	0.000561761	COX20P1
ENSG00000278023	260.435	0.980241	0.199398	4.91599	8.83333e-07	0.000633438	RDM1
ENSG00000173295	307.68	1.5687	0.320973	4.88732	1.02217e-06	0.000709353	FAM86B3P
ENSG00000137558	113.909	1.67561	0.347686	4.81931	1.44056e-06	0.000968461	PI15
ENSG00000272983	36.0586	2.32596	0.483495	4.81072	1.50391e-06	0.000980415	RP11-508N22.12
ENSG00000185052	208.25	-0.952696	0.199356	-4.77886	1.76288e-06	0.00111543	SLC24A3
ENSG00000100583	37.7219	-1.47015	0.309837	-4.74492	2.08587e-06	0.0012821	SAMD15
ENSG00000091656	403.422	0.849379	0.181704	4.67451	2.94655e-06	0.00176081	ZFHX4
ENSG00000106536	135.549	1.21996	0.261975	4.6568	3.21164e-06	0.00186735	POU6F2
ENSG00000115155	28.0182	-1.81086	0.390052	-4.64261	3.44033e-06	0.00189774	OTOF
ENSG00000162944	154.929	0.932589	0.200828	4.64373	3.42178e-06	0.00189774	RFTN2
ENSG00000223509	68.519	1.54197	0.334957	4.6035	4.15445e-06	0.00223437	RP11-632K20.7
ENSG00000185610	14.9104	3.14336	0.684201	4.5942	4.34412e-06	0.00225684	DBX2
ENSG00000255374	28.3604	2.50069	0.545248	4.58633	4.51095e-06	0.00225684	TAS2R43
ENSG00000258592	65.8863	1.53371	0.334208	4.58909	4.45178e-06	0.00225684	RP11-108M12.3
ENSG00000166435	511.655	0.947103	0.206731	4.58132	4.62042e-06	0.00225907	XRRA1
ENSG00000118322	203.569	2.29886	0.504109	4.56025	5.10932e-06	0.00244259	ATP10B
ENSG00000132561	653.894	-0.871167	0.193575	-4.50042	6.78192e-06	0.00310424	MATN2
ENSG00000264204	13.839	-3.79378	0.842943	-4.50063	6.77522e-06	0.00310424	AGAP7P
ENSG00000282458	31.509	-1.71493	0.381479	-4.49548	6.94133e-06	0.00311102	WASH5P
ENSG00000185070	391.463	-0.835559	0.186281	-4.48548	7.27509e-06	0.00319406	FLRT2
ENSG00000196684	60.6383	1.20747	0.269675	4.4775	7.55234e-06	0.00324947	HSH2D
ENSG00000183722	144.399	-1.479	0.333407	-4.43601	9.16422e-06	0.00386568	LHFP
ENSG00000125124	1087.41	0.689446	0.157727	4.37114	1.23602e-05	0.00511355	BBS2
ENSG00000265018	13.3696	-2.67375	0.613558	-4.35777	1.31393e-05	0.00533332	AGAP12P
ENSG00000198840	2863.67	0.852977	0.199469	4.27623	1.90083e-05	0.0075727	MT-ND3
ENSG00000233016	927.092	-0.545599	0.127723	-4.27173	1.93959e-05	0.0075866	SNHG7
ENSG00000124224	535.518	0.544605	0.128234	4.24697	2.16684e-05	0.00817164	PPP4R1L
ENSG00000144115	203.499	-1.11083	0.261942	-4.24074	2.22789e-05	0.00817164	THNSL2
ENSG00000181234	32.7749	2.26945	0.535323	4.23941	2.24109e-05	0.00817164	TMEM132C
ENSG00000267313	335.993	0.961848	0.226767	4.24157	2.21965e-05	0.00817164	KC6
ENSG00000182621	657.208	1.02594	0.244697	4.19271	2.75641e-05	0.00988311	PLCB1
ENSG00000075673	116.712	0.977329	0.234342	4.17052	3.03908e-05	0.010718	ATP12A
ENSG00000164845	38.8365	1.50472	0.362007	4.1566	3.23015e-05	0.0110134	FAM86FP
ENSG00000214401	30.0658	-1.46703	0.35305	-4.15531	3.24851e-05	0.0110134	KANSL1-AS1
ENSG00000278630	17.1798	5.27258	1.26948	4.15335	3.27643e-05	0.0110134	RP11-78L16.1
ENSG00000147852	2464.98	0.722677	0.174537	4.14054	3.46492e-05	0.0114678	VLDLR
ENSG00000166415	520.885	1.43399	0.34696	4.133	3.58054e-05	0.0116709	WDR72
ENSG00000204172	150.65	1.36786	0.33128	4.129	3.64337e-05	0.0116985	AGAP9
ENSG00000139835	1628.6	0.745629	0.182033	4.09612	4.20136e-05	0.0130991	GRTP1
ENSG00000276007	70.4441	1.33023	0.324632	4.09765	4.17359e-05	0.0130991	RP11-358L22.3
ENSG00000144476	50.9906	-1.12088	0.275277	-4.07184	4.66431e-05	0.0138091	ACKR3
ENSG00000148680	2724.03	1.1138	0.273006	4.07977	4.50799e-05	0.0138091	HTR7
ENSG00000259692	48.461	1.2963	0.318293	4.07266	4.64794e-05	0.0138091	RP11-499F3.2
ENSG00000270977	33.1462	1.34793	0.331125	4.07077	4.68585e-05	0.0138091	AC015849.16
ENSG00000280913	42.647	1.24547	0.308433	4.03807	5.38918e-05	0.0156672	CTSLP2
ENSG00000178852	120.088	1.27847	0.319266	4.00442	6.21706e-05	0.017833	EFCAB13
ENSG00000162374	80.821	1.12268	0.281757	3.98459	6.75972e-05	0.0191345	ELAVL4
ENSG00000160201	122.176	-0.807488	0.20321	-3.97367	7.07748e-05	0.0197738	U2AF1
ENSG00000269994	98.1575	1.42551	0.359794	3.96201	7.43227e-05	0.0204988	RP11-276H19.2
ENSG00000131507	1376.58	0.472438	0.119382	3.95735	7.57859e-05	0.0206377	NDFIP1
ENSG00000225205	121.526	-1.05512	0.269096	-3.92098	8.81879e-05	0.0235288	AC093818.1
ENSG00000227986	55.214	2.09592	0.534688	3.91989	8.85898e-05	0.0235288	TRIM60P18
ENSG00000120708	613.465	-1.11106	0.284331	-3.90764	9.32006e-05	0.0235885	TGFBI
ENSG00000145675	865.156	0.627356	0.160541	3.90776	9.31551e-05	0.0235885	PIK3R1
ENSG00000167617	114.878	0.993404	0.253676	3.91603	9.00188e-05	0.0235885	CDC42EP5
ENSG00000173705	131.371	-1.24132	0.317299	-3.91214	9.14802e-05	0.0235885	SUSD5
ENSG00000185345	59.3663	1.44504	0.370341	3.90192	9.5433e-05	0.0235983	PARK2
ENSG00000251533	29.7984	1.35894	0.348132	3.90351	9.48068e-05	0.0235983	LINC00605
ENSG00000142698	187.874	-1.17709	0.302974	-3.88512	0.000102278	0.0244478	C1orf94
ENSG00000188177	1478.06	0.599626	0.154285	3.88648	0.000101709	0.0244478	ZC3H6
ENSG00000242516	177.342	0.969966	0.24934	3.89014	0.000100187	0.0244478	LINC00960
ENSG00000261622	13.246	2.38849	0.61627	3.87572	0.000106309	0.0251321	RP11-484P15.1
ENSG00000078319	329.055	0.520744	0.134989	3.85769	0.000114464	0.0260776	PMS2P1
ENSG00000130270	227.483	1.28026	0.332	3.85621	0.000115157	0.0260776	ATP8B3
ENSG00000167754	77.8074	-1.42454	0.369137	-3.85911	0.000113803	0.0260776	KLK5
ENSG00000233006	63.3826	1.39076	0.360129	3.86184	0.000112537	0.0260776	AC034220.3
ENSG00000171793	3073.84	-0.488757	0.127376	-3.83712	0.000124486	0.0278966	CTPS1
ENSG00000188372	146.237	0.953048	0.249111	3.82579	0.000130352	0.02891	ZP3
ENSG00000241484	187.835	0.842983	0.220545	3.82228	0.000132224	0.0290258	ARHGAP8
ENSG00000230313	21.6238	1.97663	0.518003	3.81586	0.000135711	0.0294904	HCG24
ENSG00000187824	103.35	0.836121	0.219316	3.81241	0.000137621	0.0296064	TMEM220
ENSG00000186234	6.94619	4.81792	1.26837	3.79851	0.000145571	0.0307341	FAM86MP
ENSG00000200879	51.6076	-1.10661	0.291347	-3.79825	0.00014572	0.0307341	SNORD14E
ENSG00000005187	365.196	1.0611	0.280066	3.78875	0.000151409	0.0309969	ACSM3
ENSG00000162576	262.309	-1.29169	0.341122	-3.78659	0.00015273	0.0309969	MXRA8
ENSG00000234171	545.281	-0.580005	0.15303	-3.79013	0.000150568	0.0309969	RNASEH1-AS1
ENSG00000258704	105.408	0.800625	0.211041	3.7937	0.000148421	0.0309969	SRP54-AS1
ENSG00000151640	642.943	-0.750631	0.198784	-3.7761	0.0001593	0.0317317	DPYSL4
ENSG00000269067	361.467	8.02944	2.1261	3.7766	0.000158982	0.0317317	ZNF728
ENSG00000134201	82.1049	-1.13789	0.301599	-3.77286	0.000161384	0.0318518	GSTM5
ENSG00000168309	49.7043	1.24274	0.329607	3.77038	0.000163	0.0318784	FAM107A
ENSG00000188747	89.9396	1.08889	0.290467	3.74877	0.000177707	0.0344415	NOXA1
ENSG00000107959	1849.32	0.558208	0.149292	3.73904	0.000184728	0.0354826	PITRM1
ENSG00000132773	420.735	-0.721367	0.193378	-3.73035	0.000191212	0.0362404	TOE1
ENSG00000140478	46.1786	1.48073	0.397056	3.72926	0.000192042	0.0362404	GOLGA6D
ENSG00000203799	113.545	1.26679	0.340128	3.72444	0.000195749	0.0366186	CCDC162P
ENSG00000138074	3721.74	-0.528364	0.142405	-3.71028	0.000207027	0.0383945	SLC5A6
ENSG00000154240	179.195	0.774407	0.209244	3.70098	0.000214764	0.0393542	CEP112
ENSG00000229150	130.836	1.76441	0.476907	3.69969	0.00021586	0.0393542	CRYGEP
ENSG00000141698	1821.39	-0.390361	0.10571	-3.69275	0.000221839	0.0401043	NT5C3B
ENSG00000111199	173.639	0.805074	0.218557	3.68359	0.000229974	0.0405628	TRPV4
ENSG00000247626	1615.86	0.442749	0.120197	3.68352	0.000230031	0.0405628	MARS2
ENSG00000259485	90.5055	1.28089	0.347454	3.68651	0.000227348	0.0405628	CTD-2147F2.1
ENSG00000015475	1089.88	-0.611109	0.166612	-3.66787	0.000244582	0.0422359	BID
ENSG00000106341	88.3689	-1.85353	0.505742	-3.66496	0.000247373	0.0422359	PPP1R17
ENSG00000187812	20.3102	2.28214	0.622567	3.66569	0.000246672	0.0422359	RP11-24M17.5
ENSG00000235590	665.32	-0.519509	0.141625	-3.66822	0.000244248	0.0422359	GNAS-AS1
ENSG00000156113	223.329	-0.813542	0.222284	-3.65993	0.000252289	0.0424218	KCNMA1
ENSG00000168310	744.582	0.576199	0.15744	3.65981	0.000252405	0.0424218	IRF2
ENSG00000203907	18.1458	3.14561	0.860211	3.65679	0.000255396	0.0425918	OOEP
ENSG00000115267	113.08	0.940587	0.257488	3.65293	0.000259263	0.042904	IFIH1
ENSG00000225868	106.347	1.25185	0.343152	3.64808	0.000264206	0.0433883	AC016582.2
ENSG00000095932	131.712	0.829814	0.228143	3.63725	0.000275565	0.0449109	SMIM24
ENSG00000260763	9.39852	2.49404	0.686867	3.63103	0.000282287	0.0456605	RP11-445O3.3
ENSG00000260518	10.1652	-2.81675	0.776946	-3.62542	0.000288495	0.0463164	BMS1P8
ENSG00000189223	182.565	-5.50035	1.52445	-3.60809	0.00030846	0.0491549	PAX8-AS1
ENSG00000103550	6030.53	-0.514821	0.143461	-3.58858	0.000332481	0.0522092	KNOP1
ENSG00000260920	183.061	0.721445	0.201023	3.58886	0.000332127	0.0522092	RP1-228H13.5
ENSG00000140398	244.058	0.707126	0.197781	3.5753	0.000349822	0.0531057	NEIL1
ENSG00000142303	454.375	-0.708119	0.197975	-3.57681	0.000347818	0.0531057	ADAMTS10
ENSG00000155792	223.001	1.05877	0.296179	3.57477	0.000350533	0.0531057	DEPTOR
ENSG00000158711	1840.01	0.687737	0.19218	3.5786	0.000345437	0.0531057	ELK4
ENSG00000159374	311.302	0.713534	0.199338	3.57951	0.000344237	0.0531057	M1AP
ENSG00000261235	30.5626	1.27896	0.358075	3.57176	0.000354593	0.0533452	RP11-510J16.5
ENSG00000272674	95.5594	1.27822	0.358131	3.56913	0.000358163	0.0534141	PCDHB16
ENSG00000277149	303.788	-1.24591	0.349212	-3.56778	0.000360017	0.0534141	TYW1B
ENSG00000198899	1871.34	0.487229	0.136788	3.56194	0.000368128	0.0542433	MT-ATP6
ENSG00000044574	11161.3	-0.479901	0.134817	-3.55964	0.000371363	0.0543479	HSPA5
ENSG00000255621	14.799	1.66486	0.469357	3.54712	0.000389474	0.0566133	RP11-377D9.3
ENSG00000185272	197.07	0.729203	0.205734	3.54441	0.000393497	0.056814	RBM11
ENSG00000115318	429.757	0.882363	0.249337	3.53884	0.000401886	0.0576384	LOXL3
ENSG00000002746	323.483	-0.498536	0.141003	-3.53565	0.000406773	0.0577043	HECW1
ENSG00000188732	931.51	0.76831	0.217341	3.53504	0.00040771	0.0577043	FAM221A
ENSG00000260455	53.6728	0.952898	0.270139	3.52744	0.000419601	0.0589992	NBAT1
ENSG00000111788	611.337	-0.629132	0.178739	-3.51983	0.000431828	0.0603242	RP11-22B23.1
ENSG00000010165	2187.8	-0.326398	0.0927839	-3.51783	0.000435094	0.0603882	METTL13
ENSG00000169877	48.7671	1.44692	0.411603	3.51532	0.000439225	0.0605708	AHSP
ENSG00000135929	278.781	1.31048	0.373069	3.51271	0.000443569	0.0607802	CYP27A1
ENSG00000119684	1672.65	0.557386	0.15921	3.50095	0.000463603	0.0619471	MLH3
ENSG00000157916	1926.55	-0.398479	0.113797	-3.50165	0.000462387	0.0619471	RER1
ENSG00000167608	145.25	1.05758	0.302003	3.50187	0.000461999	0.0619471	TMC4
ENSG00000197181	170.226	2.48497	0.709537	3.50224	0.000461358	0.0619471	PIWIL2
ENSG00000112146	739.289	-0.50806	0.145713	-3.48671	0.000489003	0.0649378	FBXO9
ENSG00000105464	403.246	0.666254	0.191191	3.48476	0.000492587	0.0650124	GRIN2D
ENSG00000215866	59.6308	0.893079	0.256546	3.48117	0.000499232	0.0650908	LINC01356
ENSG00000261848	19.5004	1.69852	0.487845	3.48168	0.000498275	0.0650908	CTD-2309O5.3
ENSG00000117305	752.418	0.458417	0.132013	3.47251	0.000515606	0.0668207	HMGCL
ENSG00000198535	9.92136	2.71975	0.785456	3.46264	0.000534913	0.0689077	C2CD4A
ENSG00000127585	212.153	0.902298	0.260935	3.45795	0.00054431	0.0697008	FBXL16
ENSG00000139874	42.9005	1.39951	0.405671	3.44986	0.000560878	0.0713974	SSTR1
ENSG00000023608	382.204	0.705686	0.20498	3.44271	0.000575923	0.0728813	SNAPC1
ENSG00000100297	12148.9	-0.579278	0.16843	-3.43927	0.000583275	0.0733801	MCM5
ENSG00000179344	333.046	2.93172	0.854881	3.42939	0.000604929	0.0756619	HLA-DQB1
ENSG00000076344	25.2564	1.43099	0.41755	3.4271	0.000610054	0.0758618	RGS11
ENSG00000116574	438.489	0.762521	0.222787	3.42264	0.000620161	0.0763157	RHOU
ENSG00000121898	414.181	1.08195	0.316142	3.42236	0.000620799	0.0763157	CPXM2
ENSG00000260412	58.0152	1.16957	0.342052	3.41927	0.000627902	0.0767503	RP11-438B23.2
ENSG00000227403	62.2526	1.18001	0.345442	3.41594	0.000635625	0.0772554	AC009299.3
ENSG00000167195	29.4007	2.12973	0.624234	3.41176	0.000645451	0.078009	GOLGA6C
ENSG00000140675	94.6832	1.33275	0.390998	3.40857	0.000653033	0.0782499	SLC5A2
ENSG00000275464	428.526	-0.508753	0.149288	-3.40787	0.00065472	0.0782499	CH507-9B2.5
ENSG00000135905	106.154	-0.700536	0.205972	-3.40112	0.000671107	0.0797653	DOCK10
ENSG00000259445	57.5408	1.14611	0.337711	3.39376	0.00068939	0.0814882	RP11-276M12.1
ENSG00000166796	10.1798	-2.27352	0.670592	-3.39032	0.000698119	0.0817409	LDHC
ENSG00000251079	12.8418	1.77488	0.523577	3.38992	0.000699127	0.0817409	BMS1P2
ENSG00000213777	38.0852	0.994227	0.294156	3.37993	0.000725036	0.0843119	CTD-2224J9.8
ENSG00000168389	686.591	-0.642611	0.190332	-3.37626	0.000734779	0.0843463	MFSD2A
ENSG00000186047	110.175	-0.742076	0.219849	-3.3754	0.000737094	0.0843463	DLEU7
ENSG00000221955	456.192	-0.442497	0.130986	-3.37821	0.000729603	0.0843463	SLC12A8
ENSG00000152256	1349.02	-0.941946	0.279369	-3.37169	0.000747082	0.0850369	PDK1
ENSG00000197818	441.32	-0.557146	0.165347	-3.36955	0.000752915	0.0850592	SLC9A8
ENSG00000263503	7.9211	-2.5959	0.770921	-3.36728	0.000759139	0.0850592	RP11-707O23.5
ENSG00000270882	96.6498	-1.13112	0.335786	-3.36857	0.000755599	0.0850592	HIST2H4A
ENSG00000259030	12.6624	2.13796	0.635565	3.36388	0.000768559	0.0856684	FPGT-TNNI3K
ENSG00000256546	287.489	0.534457	0.159018	3.36099	0.000776642	0.0857273	AC156455.1
ENSG00000269837	429.572	-0.659893	0.196348	-3.36084	0.000777057	0.0857273	IPO5P1
ENSG00000151320	63.6995	0.832302	0.248116	3.35449	0.000795113	0.0872717	AKAP6
ENSG00000134531	38.5624	-1.46106	0.435763	-3.35288	0.000799758	0.087336	EMP1
ENSG00000130768	1375.45	-0.520911	0.155882	-3.3417	0.000832678	0.0904717	SMPDL3B
ENSG00000250682	108.979	0.780846	0.234183	3.33433	0.00085504	0.0924345	LINC00491
ENSG00000073111	9752.3	-0.366862	0.110272	-3.32687	0.00087828	0.093076	MCM2
ENSG00000114796	3697.66	0.82311	0.247389	3.32719	0.000877271	0.093076	KLHL24
ENSG00000142530	314.257	0.710689	0.213433	3.32979	0.000869101	0.093076	FAM71E1
ENSG00000267547	41.4106	1.04021	0.312645	3.32714	0.000877433	0.093076	RP11-686D22.4
ENSG00000196353	109.426	0.599806	0.18056	3.32192	0.000893994	0.0942769	CPNE4
ENSG00000115325	301.52	0.701157	0.211308	3.31818	0.000906072	0.0944177	DOK1
ENSG00000228038	71.061	-1.0402	0.3135	-3.31804	0.000906528	0.0944177	VN1R51P
ENSG00000249042	161.633	0.933585	0.281418	3.31743	0.000908495	0.0944177	CTD-2015H6.3
ENSG00000104375	1130.58	0.730463	0.22055	3.312	0.000926301	0.0956185	STK3
ENSG00000164463	755.951	1.00491	0.303487	3.31121	0.000928939	0.0956185	CREBRF
ENSG00000108375	250.499	1.05748	0.320091	3.30369	0.000954198	0.0964375	RNF43
ENSG00000121310	363.212	0.874442	0.264704	3.30347	0.000954971	0.0964375	ECHDC2
ENSG00000175311	7.25085	3.95527	1.19777	3.3022	0.00095931	0.0964375	ANKS4B
ENSG00000181192	4811.18	0.587868	0.177817	3.30603	0.000946265	0.0964375	DHTKD1
ENSG00000270276	52.8021	-1.12562	0.340329	-3.30743	0.000941562	0.0964375	HIST2H4B
ENSG00000250616	134.103	-2.77963	0.842269	-3.30017	0.000966256	0.096684	RP11-455F5.3
ENSG00000267711	12.2515	1.90965	0.579637	3.29456	0.000985749	0.0981778	RP11-686D22.5
ENSG00000104331	2301.85	0.553346	0.168102	3.29172	0.00099576	0.0982651	IMPAD1
ENSG00000250420	52.6872	1.88568	0.572659	3.29285	0.000991757	0.0982651	AACSP1
ENSG00000100100	162.149	0.997158	0.303427	3.28633	0.00101504	0.0995809	PIK3IP1
ENSG00000280623	77.3326	1.45487	0.442828	3.28541	0.00101835	0.0995809	PCAT14
ENSG00000157150	95.9767	-1.12797	0.344114	-3.27789	0.00104587	0.10181	TIMP4
ENSG00000164669	7.55381	-2.56235	0.783356	-3.271	0.0010717	0.103853	INTS4P1
ENSG00000178636	15.0806	1.68294	0.514964	3.26807	0.00108284	0.104463	RP11-455G16.1
ENSG00000110107	4504.93	-0.426824	0.130775	-3.2638	0.0010993	0.105577	PRPF19
ENSG00000122870	99.435	-1.03271	0.316643	-3.26143	0.00110851	0.105989	BICC1
ENSG00000133019	538.455	0.664432	0.204074	3.25583	0.0011306	0.107622	CHRM3
ENSG00000123146	136.249	-0.563294	0.173271	-3.25095	0.00115022	0.107724	ADGRE5
ENSG00000146729	2254.2	0.611246	0.188256	3.24689	0.00116672	0.107724	GBAS
ENSG00000166446	301.364	-0.48482	0.149241	-3.24857	0.00115987	0.107724	CDYL2
ENSG00000197279	708.458	0.797667	0.245523	3.24884	0.00115875	0.107724	ZNF165
ENSG00000204588	25.9912	1.29865	0.399951	3.24702	0.00116618	0.107724	LINC01123
ENSG00000235026	48.2932	-0.779569	0.239778	-3.25121	0.00114913	0.107724	DPP10-AS1
ENSG00000281205	219.97	0.765689	0.235349	3.25342	0.00114025	0.107724	LINC00950
ENSG00000172336	1358.48	-0.419122	0.129178	-3.24453	0.00117644	0.108157	POP7
ENSG00000052749	3091.89	-0.37882	0.11709	-3.2353	0.00121514	0.110952	RRP12
ENSG00000207357	231.458	-2.28134	0.705242	-3.23483	0.00121716	0.110952	RNU6-2
ENSG00000134202	120.767	-0.673588	0.208315	-3.23351	0.00122278	0.110994	GSTM3
ENSG00000197355	265.972	1.33831	0.414754	3.22677	0.00125197	0.112694	UAP1L1
ENSG00000224669	28.3444	1.6198	0.50199	3.22676	0.00125198	0.112694	RP11-561N12.1
ENSG00000103174	269.697	-0.551426	0.171146	-3.22196	0.00127315	0.114122	NAGPA
ENSG00000092871	736.847	0.490637	0.152494	3.21741	0.00129353	0.115467	RFFL
ENSG00000113749	314.757	0.568681	0.176994	3.213	0.00131356	0.116771	HRH2
ENSG00000100162	639.374	-0.440029	0.137032	-3.21115	0.00132205	0.117043	CENPM
ENSG00000147364	539.545	0.708605	0.220894	3.2079	0.00133706	0.117886	FBXO25
ENSG00000104808	67.5783	0.966305	0.30212	3.19842	0.00138183	0.121336	DHDH
ENSG00000204291	19.1289	-1.32018	0.412977	-3.19675	0.00138986	0.121379	COL15A1
ENSG00000269343	2542.81	-0.532012	0.166463	-3.19597	0.0013936	0.121379	ZNF587B
ENSG00000144306	281.247	0.814457	0.255113	3.19253	0.00141033	0.12234	SCRN3
ENSG00000033011	1023.45	-0.525166	0.164786	-3.18695	0.00143779	0.124222	ALG1
ENSG00000243811	586.883	0.630438	0.197891	3.18579	0.00144361	0.124226	APOBEC3D
ENSG00000233971	15.0684	-1.45913	0.45834	-3.18351	0.001455	0.124706	RPS20P10
ENSG00000100664	8487.34	-0.817688	0.257425	-3.17641	0.00149111	0.127295	EIF5
ENSG00000278259	4847.77	-0.3041	0.0957725	-3.17523	0.00149716	0.127306	MYO19
ENSG00000253190	683.308	-1.1737	0.370568	-3.1673	0.00153859	0.130314	AC084082.3
ENSG00000018408	656.317	0.499534	0.157914	3.16333	0.00155973	0.130365	WWTR1
ENSG00000119147	32.5778	-1.04166	0.3296	-3.16039	0.00157555	0.130365	C2orf40
ENSG00000167772	79.866	0.973251	0.307485	3.1652	0.00154974	0.130365	ANGPTL4
ENSG00000236404	307.28	0.848408	0.268379	3.16123	0.00157102	0.130365	VLDLR-AS1
ENSG00000248498	72.485	4.88791	1.54609	3.16146	0.00156982	0.130365	ASNSP1
ENSG00000261135	20.6396	1.34267	0.424499	3.16296	0.00156176	0.130365	RP4-798A10.7
ENSG00000186976	43.0198	-1.0544	0.334017	-3.15671	0.00159559	0.131517	EFCAB6
ENSG00000215186	29.3912	1.90478	0.605257	3.14707	0.00164918	0.134389	GOLGA6B
ENSG00000262001	1039.73	0.696819	0.221364	3.14784	0.00164483	0.134389	DLGAP1-AS2
ENSG00000267284	65.7076	0.831658	0.264114	3.14886	0.0016391	0.134389	RP11-397A16.1
ENSG00000280367	57.2919	1.07692	0.342413	3.1451	0.00166028	0.134783	RP11-121L10.2
ENSG00000065675	1153.16	0.730042	0.232362	3.14183	0.00167898	0.13528	PRKCQ
ENSG00000100242	637.643	0.657657	0.209303	3.14212	0.00167729	0.13528	SUN2
ENSG00000162946	136.696	-0.633377	0.202018	-3.13526	0.00171704	0.137319	DISC1
ENSG00000278970	219.347	0.619036	0.197435	3.13539	0.00171623	0.137319	HEIH
ENSG00000258376	46.6739	2.90791	0.92785	3.13403	0.00172425	0.137384	RP4-647C14.2
ENSG00000169169	1519.28	-0.49169	0.156985	-3.13209	0.00173568	0.137785	CPT1C
ENSG00000116032	27.7659	1.27382	0.40739	3.12679	0.00176726	0.139776	GRIN3B
ENSG00000179218	19265.9	-0.428916	0.137289	-3.12418	0.00178302	0.140506	CALR
ENSG00000134324	1049.44	0.641482	0.205527	3.12116	0.0018014	0.141436	LPIN1
ENSG00000198885	473.828	-0.549941	0.176537	-3.11516	0.00183847	0.143822	ITPRIPL1
ENSG00000064989	306.375	1.35083	0.433852	3.11358	0.00184832	0.143899	CALCRL
ENSG00000172840	1986.45	0.552719	0.17756	3.11286	0.00185283	0.143899	PDP2
ENSG00000080511	9.66325	2.30493	0.741079	3.11023	0.00186941	0.144664	RDH8
ENSG00000235559	18.062	-1.52406	0.4902	-3.10905	0.00187692	0.144725	NOP56P1
ENSG00000169900	36.7681	1.36299	0.438818	3.10604	0.00189611	0.145682	PYDC1
ENSG00000135605	362.803	1.13529	0.367304	3.09086	0.00199577	0.149969	TEC
ENSG00000197785	1758.13	-0.382007	0.123512	-3.09287	0.00198233	0.149969	ATAD3A
ENSG00000233593	47.0668	1.29214	0.418174	3.08995	0.00200187	0.149969	RP4-665J23.1
ENSG00000235920	13.0231	-1.2806	0.414017	-3.0931	0.00198074	0.149969	AC073109.2
ENSG00000237491	101.224	0.70644	0.228697	3.08898	0.00200847	0.149969	RP11-206L10.9
ENSG00000258702	39.3295	0.918902	0.297566	3.08806	0.00201465	0.149969	RP11-433J8.1
ENSG00000260265	49.9427	1.11746	0.361357	3.0924	0.00198543	0.149969	RP11-44F21.5
ENSG00000267327	72.6077	1.21301	0.392605	3.08966	0.00200387	0.149969	CTD-2008L17.1
ENSG00000272894	69.4105	0.80823	0.261545	3.09021	0.00200013	0.149969	RP5-1159O4.1
ENSG00000226792	597.28	-0.830778	0.269404	-3.08376	0.002044	0.15163	LINC00371
ENSG00000256663	52.5344	-0.917196	0.297633	-3.08163	0.00205872	0.152197	RP11-424C20.2
ENSG00000110436	119.837	-0.735899	0.239044	-3.0785	0.00208043	0.152752	SLC1A2
ENSG00000157554	199.999	1.14465	0.371737	3.07919	0.00207565	0.152752	ERG
ENSG00000177082	760.86	-0.512036	0.166631	-3.07287	0.00212011	0.155136	WDR73
ENSG00000167588	12.1425	-1.49705	0.487444	-3.07124	0.00213175	0.155459	GPD1
ENSG00000092094	1191.13	-0.326449	0.106329	-3.07018	0.00213931	0.155483	OSGEP
ENSG00000205758	613.43	0.564996	0.184192	3.06742	0.00215912	0.156395	CRYZL1
ENSG00000047662	30.6505	-1.2814	0.418079	-3.06497	0.0021769	0.15652	FAM184B
ENSG00000124766	18379.7	0.436518	0.142487	3.06356	0.00218723	0.15652	SOX4
ENSG00000168952	390.518	-0.596969	0.19478	-3.06484	0.00217788	0.15652	STXBP6
ENSG00000251152	13.5973	1.64231	0.536144	3.06318	0.00218995	0.15652	RP11-281P23.1
ENSG00000166147	783.195	-1.10041	0.360256	-3.05452	0.00225424	0.160051	FBN1
ENSG00000254701	7.56787	2.35391	0.770499	3.05504	0.00225028	0.160051	RP11-1415C14.4
ENSG00000138080	167.259	-0.873871	0.286369	-3.05156	0.00227656	0.160576	EMILIN1
ENSG00000206077	53.5202	1.38845	0.45491	3.05214	0.00227212	0.160576	ZDHHC11B
ENSG00000186868	86.6667	0.699896	0.229647	3.0477	0.00230597	0.162035	MAPT
ENSG00000187372	72.7183	1.10306	0.362146	3.0459	0.00231984	0.162035	PCDHB13
ENSG00000197728	8744.7	-0.615737	0.202127	-3.04629	0.00231687	0.162035	RPS26
ENSG00000143633	365.508	-0.510696	0.167828	-3.04297	0.00234259	0.163094	C1orf131
ENSG00000006453	1761.65	0.453867	0.14955	3.03488	0.00240634	0.166963	BAIAP2L1
ENSG00000164236	833.103	-0.678618	0.223674	-3.03396	0.00241368	0.166963	ANKRD33B
ENSG00000132967	372.652	-1.11518	0.367954	-3.03077	0.00243928	0.167655	HMGB1P5
ENSG00000241644	59.0121	1.15825	0.382045	3.03171	0.00243175	0.167655	INMT
ENSG00000186715	164.163	0.986537	0.32566	3.02935	0.0024508	0.167911	MST1L
ENSG00000178458	66.468	-0.726163	0.239896	-3.02698	0.00247007	0.168694	H3F3AP6
ENSG00000231742	33.3821	1.02881	0.340013	3.02581	0.00247968	0.168814	LINC01273
ENSG00000186417	82.5951	0.886807	0.293442	3.02209	0.00251036	0.170364	GLDN
ENSG00000012223	12.1415	-1.58151	0.523749	-3.01959	0.00253113	0.170494	LTF
ENSG00000124587	1025.51	0.842046	0.278915	3.01901	0.00253606	0.170494	PEX6
ENSG00000128581	366.098	-0.525364	0.173972	-3.01983	0.00252919	0.170494	IFT22
ENSG00000170619	469.191	-0.448341	0.148582	-3.01746	0.00254904	0.170833	COMMD5
ENSG00000260625	26.4912	1.05365	0.349299	3.01647	0.00255737	0.170859	RP11-452L6.7
ENSG00000169683	1051.47	-0.477385	0.158317	-3.01537	0.00256668	0.170951	LRRC45
ENSG00000236008	37.2898	0.865861	0.287345	3.01331	0.00258413	0.171582	AC011747.4
ENSG00000135205	50.7553	0.943626	0.313384	3.01109	0.00260314	0.172312	CCDC146
ENSG00000177694	55.9747	0.773933	0.257225	3.00878	0.00262301	0.172565	NAALADL2
ENSG00000188659	49.0358	-1.09047	0.362355	-3.00939	0.00261772	0.172565	SAXO2
ENSG00000008226	46.9746	-0.811947	0.270305	-3.00381	0.00266618	0.173502	DLEC1
ENSG00000105329	97.5513	-0.627231	0.208752	-3.00467	0.00265868	0.173502	TGFB1
ENSG00000123095	93.2041	1.60075	0.53265	3.00525	0.00265361	0.173502	BHLHE41
ENSG00000137573	1525.37	0.848791	0.282777	3.00162	0.00268546	0.173502	SULF1
ENSG00000173451	455.859	0.640498	0.213386	3.0016	0.00268565	0.173502	THAP2
ENSG00000197813	22.9469	1.25998	0.419549	3.00318	0.00267172	0.173502	CTC-301O7.4
ENSG00000277007	34.8815	0.960389	0.320348	2.99796	0.00271797	0.175065	RP11-392O17.2
ENSG00000234444	1310.86	2.27963	0.761036	2.99543	0.00274059	0.175471	ZNF736
ENSG00000254585	178.613	1.01509	0.338849	2.99569	0.00273821	0.175471	MAGEL2
ENSG00000100023	1090.24	-0.396251	0.132651	-2.98718	0.0028156	0.178153	PPIL2
ENSG00000116199	3792.91	0.342165	0.114536	2.98741	0.00281349	0.178153	FAM20B
ENSG00000224557	983.864	0.413618	0.138367	2.98928	0.00279633	0.178153	HLA-DPB2
ENSG00000255040	11.8753	-1.3336	0.446274	-2.9883	0.0028053	0.178153	RP11-677N16.1
ENSG00000166183	93.9539	0.843367	0.282446	2.98595	0.00282703	0.178351	ASPG
ENSG00000162399	13.468	-1.38942	0.465843	-2.9826	0.00285813	0.179262	BSND
ENSG00000230923	9.52397	-1.64344	0.550973	-2.98279	0.00285636	0.179262	LINC00309
ENSG00000120332	53.0347	-0.864185	0.289969	-2.98027	0.00287996	0.180106	TNN
ENSG00000166311	83.4825	0.997793	0.335284	2.97597	0.00292068	0.181806	SMPD1
ENSG00000204592	1707.35	0.491882	0.165304	2.97561	0.00292404	0.181806	HLA-E
ENSG00000105088	1899.02	0.554829	0.186831	2.96969	0.00298104	0.181907	OLFM2
ENSG00000138802	1948.32	0.422963	0.142279	2.97276	0.00295132	0.181907	SEC24B
ENSG00000147439	613.543	-0.412586	0.138951	-2.9693	0.00298484	0.181907	BIN3
ENSG00000179299	1514.64	0.357357	0.120248	2.97182	0.00296037	0.181907	NSUN7
ENSG00000226383	426.378	0.673433	0.226799	2.96929	0.00298485	0.181907	AC093375.1
ENSG00000231312	186.001	0.785396	0.264326	2.97132	0.00296527	0.181907	AC007246.3
ENSG00000246792	286.986	1.25546	0.422478	2.97166	0.00296193	0.181907	RP11-68L18.1
ENSG00000163481	574.711	-0.43988	0.148207	-2.96801	0.00299731	0.18215	RNF25
ENSG00000128594	352.065	-0.981723	0.330869	-2.96711	0.00300614	0.182172	LRRC4
ENSG00000091436	1562.59	0.361772	0.122232	2.95972	0.00307922	0.182411	AC013461.1
ENSG00000107262	710.986	-0.386602	0.130538	-2.9616	0.0030605	0.182411	BAG1
ENSG00000139890	59.9479	-0.691758	0.233539	-2.96207	0.00305578	0.182411	REM2
ENSG00000146038	45.7057	1.25253	0.423418	2.95815	0.00309488	0.182411	DCDC2
ENSG00000151962	156.014	2.80282	0.947207	2.95903	0.00308607	0.182411	RBM46
ENSG00000179698	63.611	1.44929	0.488965	2.96399	0.00303674	0.182411	WDR97
ENSG00000214077	62.0577	-0.75569	0.255278	-2.96026	0.00307376	0.182411	GNAQP1
ENSG00000249395	159.342	1.2721	0.429806	2.95972	0.00307923	0.182411	CASC9
ENSG00000260066	37.7412	-1.00678	0.3403	-2.95852	0.00309121	0.182411	CTD-2587M23.1
ENSG00000278266	17.5198	1.7555	0.592291	2.96392	0.00303746	0.182411	RP11-575F12.3
ENSG00000172575	300.646	0.448082	0.151573	2.95621	0.00311444	0.182564	RASGRP1
ENSG00000278272	6537.65	2.23046	0.754396	2.95661	0.00311038	0.182564	HIST1H3C
ENSG00000115183	973.276	-0.351938	0.119267	-2.95083	0.00316917	0.184765	TANC1
ENSG00000251562	71129.6	0.868372	0.294202	2.95161	0.00316117	0.184765	MALAT1
ENSG00000170291	1022.75	-0.299503	0.101624	-2.94718	0.0032069	0.186284	ELP5
ENSG00000197933	270.381	0.472682	0.160459	2.9458	0.0032212	0.186284	ZNF823
ENSG00000198830	6192.09	-0.365432	0.124048	-2.94588	0.00322038	0.186284	HMGN2
ENSG00000109846	35.3561	-0.945457	0.321061	-2.94479	0.00323174	0.186392	CRYAB
ENSG00000088305	43238.4	-0.446075	0.151649	-2.94149	0.00326637	0.187165	DNMT3B
ENSG00000130433	73.842	0.688245	0.233936	2.94202	0.00326081	0.187165	CACNG6
ENSG00000275371	9.37018	-2.9991	1.01975	-2.94103	0.00327124	0.187165	RP11-455F5.6
ENSG00000107968	502.98	1.19545	0.40674	2.93909	0.00329178	0.187841	MAP3K8
ENSG00000078699	705.271	0.629363	0.21428	2.93711	0.00331286	0.188544	CBFA2T2
ENSG00000177839	34.1492	1.33742	0.455624	2.93537	0.00333152	0.189106	PCDHB9
ENSG00000100462	4602.36	-0.352302	0.120093	-2.93356	0.00335094	0.189707	PRMT5
ENSG00000171345	3253.53	-0.425869	0.145364	-2.92968	0.00339312	0.190591	KRT19
ENSG00000183960	350.117	0.516333	0.176186	2.93062	0.00338291	0.190591	KCNH8
ENSG00000273481	8.98547	2.02069	0.689639	2.93007	0.00338885	0.190591	RP11-126K1.9
ENSG00000229893	11.2362	1.5293	0.522463	2.9271	0.00342139	0.191678	AC004549.6
ENSG00000140459	141.452	0.605143	0.206882	2.92506	0.00344394	0.191942	CYP11A1
ENSG00000277511	17.4109	1.34674	0.460352	2.92546	0.00343947	0.191942	CTD-2095E4.5
ENSG00000124613	442.446	0.559816	0.191469	2.92379	0.003458	0.192227	ZNF391
ENSG00000176124	259.926	0.646017	0.22106	2.92236	0.00347393	0.192615	DLEU1
ENSG00000138764	812.353	0.639292	0.218886	2.92066	0.0034929	0.193169	CCNG2
ENSG00000165476	1585.76	0.578164	0.198237	2.91653	0.0035395	0.194061	REEP3
ENSG00000165914	944.697	0.388897	0.133399	2.91529	0.00355359	0.194061	TTC7B
ENSG00000198355	1814.84	0.67206	0.230515	2.91547	0.00355158	0.194061	PIM3
ENSG00000203811	91.4783	-1.04836	0.359613	-2.91524	0.00355413	0.194061	HIST2H3C
ENSG00000226686	64.916	2.70233	0.9263	2.91734	0.00353035	0.194061	LINC01535
ENSG00000163421	38.3138	1.13327	0.389059	2.91286	0.00358132	0.195051	PROK2
ENSG00000214654	163.358	-0.71225	0.244761	-2.90998	0.00361452	0.19597	RP11-27I1.4
ENSG00000229692	117.371	0.668449	0.229722	2.90982	0.00361642	0.19597	SOS1-IT1
ENSG00000180318	27.7503	1.27255	0.437743	2.90708	0.0036482	0.197195	ALX1
ENSG00000164124	255.319	0.556689	0.191736	2.90341	0.0036912	0.197514	TMEM144
ENSG00000181031	78.844	0.915746	0.315484	2.90267	0.00369999	0.197514	RPH3AL
ENSG00000231389	128.936	0.843311	0.290298	2.90498	0.00367278	0.197514	HLA-DPA1
ENSG00000259775	19.3023	1.29833	0.446836	2.9056	0.00366547	0.197514	RP11-45P15.4
ENSG00000266965	22.5068	-1.01631	0.350104	-2.90287	0.00369756	0.197514	RP11-712P20.2
ENSG00000155158	1392.33	0.49609	0.17111	2.89925	0.0037406	0.199187	TTC39B
ENSG00000164181	489.371	0.694998	0.239908	2.89694	0.0037682	0.199784	ELOVL7
ENSG00000235706	199.752	0.658782	0.227481	2.89599	0.00377967	0.199784	DICER1-AS1
ENSG00000259045	8.8249	-2.32581	0.802929	-2.89666	0.00377159	0.199784	MTCO1P2
ENSG00000103811	778.172	0.390713	0.13526	2.88861	0.0038695	0.201921	CTSH
ENSG00000114473	365.3	-0.470037	0.16263	-2.89023	0.00384956	0.201921	IQCG
ENSG00000160345	159.566	-0.60591	0.209855	-2.88729	0.00388581	0.201921	C9orf116
ENSG00000173041	1733.47	0.890064	0.307982	2.88999	0.00385252	0.201921	ZNF680
ENSG00000223745	604.443	0.573271	0.198429	2.88905	0.00386407	0.201921	CCDC18-AS1
ENSG00000251661	23.1628	1.10243	0.381778	2.88761	0.00388179	0.201921	RP11-326C3.11
ENSG00000260804	209.854	-0.471319	0.16305	-2.89065	0.00384452	0.201921	PKI55
ENSG00000177963	2255.13	-0.408731	0.141605	-2.88642	0.00389654	0.201991	RIC8A
ENSG00000162782	104.979	0.921045	0.319321	2.88438	0.00392182	0.202266	TDRD5
ENSG00000178568	218.8	0.786849	0.272859	2.88372	0.00393004	0.202266	ERBB4
ENSG00000187624	35.0009	-1.22987	0.426415	-2.88421	0.00392396	0.202266	C17orf97
ENSG00000197417	272.898	-0.482846	0.167549	-2.88182	0.00395386	0.202847	SHPK
ENSG00000227533	208.746	0.816852	0.2835	2.88131	0.0039602	0.202847	SLC2A1-AS1
ENSG00000184144	90.3851	-1.00506	0.349118	-2.87886	0.00399113	0.203462	CNTN2
ENSG00000262874	34.2398	1.0424	0.36205	2.87917	0.0039872	0.203462	C19orf84
ENSG00000037897	455.299	-0.44674	0.155306	-2.87652	0.00402093	0.204015	METTL1
ENSG00000182544	481.306	-0.475768	0.165396	-2.87654	0.00402055	0.204015	MFSD5
ENSG00000099812	17.5867	1.18372	0.4123	2.871	0.00409172	0.205666	MISP
ENSG00000103253	412.548	0.450271	0.156831	2.87107	0.00409091	0.205666	HAGHL
ENSG00000169896	47.3609	1.12291	0.390839	2.87306	0.00406516	0.205666	ITGAM
ENSG00000236924	195.984	0.862166	0.300287	2.87114	0.00408995	0.205666	RP11-390F4.6
ENSG00000204252	1914.09	0.518177	0.180545	2.87008	0.00410368	0.205787	HLA-DOA
ENSG00000133110	212.079	-3.09381	1.07836	-2.869	0.00411778	0.206013	POSTN
ENSG00000179715	89.9165	0.555366	0.193652	2.86786	0.00413258	0.206274	PCED1B
ENSG00000007255	582.475	0.462274	0.16137	2.86468	0.00417426	0.206516	TRAPPC6A
ENSG00000125869	29.6982	-1.58087	0.551629	-2.86581	0.0041594	0.206516	LAMP5
ENSG00000182853	9.11315	1.87139	0.65329	2.86456	0.00417583	0.206516	VMO1
ENSG00000205363	323.187	-0.727661	0.253866	-2.86632	0.00415279	0.206516	C15orf59
ENSG00000197467	145.351	-0.686493	0.240014	-2.86022	0.00423348	0.208887	COL13A1
ENSG00000198804	67485.8	0.664174	0.2323	2.85913	0.00424809	0.209129	MT-CO1
ENSG00000109113	4562.44	-0.381515	0.133487	-2.85806	0.00426235	0.209352	RAB34
ENSG00000229271	33.4372	1.38416	0.484524	2.85674	0.00428019	0.209749	AC091493.2
ENSG00000172123	933.934	0.710711	0.248879	2.85565	0.00429482	0.209987	SLFN12
ENSG00000204642	145.751	0.518599	0.181674	2.85456	0.00430968	0.210236	HLA-F
ENSG00000146674	299.693	-0.786945	0.275835	-2.85296	0.00433142	0.210819	IGFBP3
ENSG00000108798	83.2526	-0.792611	0.278189	-2.84918	0.00438322	0.211644	ABI3
ENSG00000148158	2333.57	0.543503	0.19078	2.84885	0.00438772	0.211644	SNX30
ENSG00000164743	20.2227	-1.28355	0.450229	-2.85087	0.00435993	0.211644	C8orf48
ENSG00000173269	62.0192	-0.676683	0.237452	-2.84976	0.00437517	0.211644	MMRN2
ENSG00000134874	2234.26	-0.463316	0.162782	-2.84624	0.00442393	0.212913	DZIP1
ENSG00000121691	1122.02	0.683535	0.240393	2.84341	0.00446341	0.214333	CAT
ENSG00000248008	244.032	-0.408324	0.143661	-2.84227	0.00447937	0.214621	NRAV
ENSG00000143318	28.6419	-1.17152	0.412798	-2.838	0.00453968	0.216881	CASQ1
ENSG00000272341	20.1153	1.46297	0.515584	2.83751	0.00454671	0.216881	RP1-151F17.2
ENSG00000268225	142.708	0.673921	0.237612	2.83622	0.00456509	0.217276	CTD-2331H12.5
ENSG00000216031	42.0766	-0.903947	0.318921	-2.83439	0.00459131	0.218042	MIR298
ENSG00000198156	9.4549	1.85979	0.656499	2.83289	0.00461294	0.218106	NPIPB6
ENSG00000257800	73.5273	0.941369	0.332247	2.83334	0.00460637	0.218106	FNBP1P1
ENSG00000243244	877.937	0.680073	0.240258	2.8306	0.00464607	0.219191	STON1
ENSG00000134262	373.638	-0.477644	0.169	-2.8263	0.00470897	0.220706	AP4B1
ENSG00000164591	393.933	-0.51368	0.181701	-2.82706	0.00469777	0.220706	MYOZ3
ENSG00000220008	31.0034	1.37845	0.487685	2.82652	0.00470568	0.220706	LINGO3
ENSG00000255666	844.087	0.80197	0.283876	2.82508	0.00472695	0.221067	RP11-867G2.6
ENSG00000197989	937.618	-0.395867	0.14021	-2.82339	0.00475189	0.221752	SNHG12
ENSG00000182134	1184.62	0.327325	0.116009	2.82156	0.00477912	0.22254	TDRKH
ENSG00000158825	76.6811	0.921319	0.326665	2.82038	0.0047967	0.222876	CDA
ENSG00000133107	133.573	-0.803498	0.284973	-2.81956	0.00480894	0.222963	TRPC4
ENSG00000117480	359.176	-0.903506	0.320579	-2.81836	0.00482704	0.223227	FAAH
ENSG00000280316	41.9996	0.850396	0.301794	2.8178	0.00483539	0.223227	AL365181.1
ENSG00000054179	33.1336	1.03511	0.367505	2.81658	0.00485381	0.223597	ENTPD2
ENSG00000234791	7.91651	-1.51168	0.536933	-2.81539	0.00487174	0.223944	AC108448.3
ENSG00000050405	2839.98	0.496433	0.176422	2.81389	0.00489461	0.224038	LIMA1
ENSG00000130165	1356.83	-0.368212	0.130836	-2.81431	0.00488825	0.224038	ELOF1
ENSG00000066629	888.049	-0.406046	0.14438	-2.81234	0.00491831	0.224644	EML1
ENSG00000090857	3451.62	-0.69896	0.248776	-2.80959	0.0049604	0.225133	PDPR
ENSG00000103227	229.24	0.762261	0.271247	2.81021	0.00495091	0.225133	LMF1
ENSG00000254837	209.033	0.566851	0.20171	2.81023	0.00495059	0.225133	AP001372.2
ENSG00000122971	239.758	0.51124	0.182183	2.80619	0.00501314	0.227012	ACADS
ENSG00000166676	121.653	0.537796	0.191689	2.80556	0.00502291	0.227012	TVP23A
ENSG00000111644	59.5624	1.00935	0.359888	2.80463	0.00503749	0.227194	ACRBP
ENSG00000011332	252.162	-0.670959	0.239721	-2.79892	0.00512739	0.227797	DPF1
ENSG00000113758	13002.3	-0.370038	0.132214	-2.79877	0.00512974	0.227797	DBN1
ENSG00000122687	1196.03	-0.396716	0.141765	-2.7984	0.00513558	0.227797	MRM2
ENSG00000128908	1990.67	-0.417825	0.149217	-2.80011	0.00510846	0.227797	INO80
ENSG00000137310	699.085	-0.403161	0.143878	-2.8021	0.00507714	0.227797	TCF19
ENSG00000169855	7683.15	0.64678	0.231009	2.79981	0.00511332	0.227797	ROBO1
ENSG00000198712	10993.7	0.726463	0.259454	2.79996	0.00511087	0.227797	MT-CO2
ENSG00000203812	57.147	-1.10624	0.394816	-2.80191	0.00508008	0.227797	HIST2H2AA3
ENSG00000169981	884.529	-0.391752	0.140087	-2.79648	0.00516624	0.228686	ZNF35
ENSG00000108312	4341.44	-0.356576	0.127622	-2.794	0.00520599	0.229032	UBTF
ENSG00000131437	652.206	0.386086	0.13813	2.79509	0.00518859	0.229032	KIF3A
ENSG00000138032	3838.74	0.384137	0.137457	2.79459	0.00519649	0.229032	PPM1B
ENSG00000116793	1466.46	-0.466124	0.16697	-2.79166	0.00524381	0.229443	PHTF1
ENSG00000155465	204.495	-0.493787	0.176976	-2.79013	0.00526866	0.229443	SLC7A7
ENSG00000185298	1113.61	-0.411849	0.1476	-2.79031	0.00526574	0.229443	CCDC137
ENSG00000187609	233.151	0.698841	0.250465	2.79018	0.00526791	0.229443	EXD3
ENSG00000240032	15.2301	-1.33946	0.479849	-2.79142	0.00524766	0.229443	RP11-274H2.3
ENSG00000162734	1271.08	-0.374267	0.134191	-2.78905	0.00528623	0.229743	PEA15
ENSG00000224886	23.179	1.25392	0.449945	2.78684	0.00532246	0.230464	RP11-119F19.4
ENSG00000228252	36.4113	-1.44446	0.518336	-2.78673	0.00532425	0.230464	COL6A4P2
ENSG00000197444	1064.54	0.473844	0.170084	2.78594	0.00533731	0.230565	OGDHL
ENSG00000151572	122.602	-0.757203	0.271949	-2.78436	0.0053634	0.230766	ANO4
ENSG00000214711	17.7695	1.22296	0.43917	2.78471	0.00535753	0.230766	CAPN14
ENSG00000011347	646.988	0.902145	0.324382	2.78112	0.00541722	0.231451	SYT7
ENSG00000185495	275.383	0.456426	0.164094	2.78149	0.00541101	0.231451	RP11-504P24.3
ENSG00000188002	310.925	0.422259	0.151847	2.78081	0.00542236	0.231451	RP11-43F13.1
ENSG00000261175	135.622	-0.857394	0.30824	-2.78158	0.00540953	0.231451	CTD-2015G9.2
ENSG00000160200	1594.22	0.522707	0.188068	2.77936	0.00544661	0.232025	CBS
ENSG00000007171	114.532	-0.655941	0.23624	-2.77659	0.00549322	0.233088	NOS2
ENSG00000113368	9832.59	-0.344183	0.123941	-2.77699	0.00548653	0.233088	LMNB1
ENSG00000254876	163.685	0.495957	0.178677	2.77571	0.00550806	0.233258	RP11-23J9.5
ENSG00000162409	1319.88	0.731578	0.263671	2.77459	0.00552712	0.233605	PRKAA2
ENSG00000256577	8.75754	-1.4454	0.521084	-2.77384	0.00553992	0.233687	RP11-283I3.2
ENSG00000109787	1631.91	0.368254	0.132821	2.77255	0.0055619	0.233891	KLF3
ENSG00000215256	324.424	0.576437	0.207929	2.77228	0.00556649	0.233891	DHRS4-AS1
ENSG00000120324	59.8831	1.29585	0.467754	2.77037	0.00559931	0.233902	PCDHB10
ENSG00000144136	3425.78	-0.40081	0.144729	-2.76938	0.00561626	0.233902	SLC20A1
ENSG00000148297	2045.7	-0.380551	0.137446	-2.76874	0.00562743	0.233902	MED22
ENSG00000166473	286.498	1.105	0.398687	2.77159	0.00557832	0.233902	PKD1L2
ENSG00000246560	47.6095	-0.656984	0.23731	-2.76847	0.00563201	0.233902	RP11-10L12.4
ENSG00000266066	23.3329	-1.51794	0.54806	-2.76966	0.00561156	0.233902	POLRMTP1
ENSG00000230091	55.857	-0.865086	0.312671	-2.76676	0.00566165	0.23468	TMEM254-AS1
ENSG00000279348	216.829	-0.550719	0.19911	-2.7659	0.00567655	0.234846	RP11-566E18.1
ENSG00000164300	4837.52	0.584419	0.21162	2.76164	0.00575123	0.236185	SERINC5
ENSG00000167981	348.318	-0.93302	0.337888	-2.76133	0.0057566	0.236185	ZNF597
ENSG00000186577	206.118	0.660032	0.239028	2.76131	0.00575695	0.236185	C6orf1
ENSG00000261599	6.96143	-3.51745	1.2738	-2.76137	0.00575587	0.236185	HERC2P8
ENSG00000280852	24.24	1.16084	0.420452	2.76092	0.00576384	0.236185	CTD-2319I12.10
ENSG00000180425	170.383	0.595287	0.215708	2.75969	0.00578556	0.236625	C11orf71
ENSG00000206532	115.604	-2.27668	0.825188	-2.75899	0.00579807	0.236687	RP11-553A10.1
ENSG00000164707	189.957	0.516518	0.187284	2.75795	0.00581659	0.236993	SLC13A4
ENSG00000165215	568.363	0.857882	0.311402	2.7549	0.005871	0.238307	CLDN3
ENSG00000188001	51.5883	0.832572	0.302195	2.75508	0.0058678	0.238307	TPRG1
ENSG00000111261	168.04	0.499743	0.181616	2.75165	0.00592962	0.239094	MANSC1
ENSG00000132466	7923.89	-0.357428	0.129939	-2.75075	0.00594595	0.239094	ANKRD17
ENSG00000142273	621.667	0.53517	0.194531	2.75108	0.00593993	0.239094	CBLC
ENSG00000180628	231.251	0.7513	0.273064	2.75136	0.00593475	0.239094	PCGF5
ENSG00000234664	111.27	-0.473589	0.172112	-2.75163	0.00592996	0.239094	HMGN2P5
ENSG00000100116	1064.79	0.425476	0.154896	2.74686	0.00601697	0.241307	GCAT
ENSG00000128191	1910.24	-0.384744	0.140085	-2.7465	0.00602343	0.241307	DGCR8
ENSG00000278771	47012.7	0.657486	0.23957	2.74444	0.00606139	0.242377	Metazoa
ENSG00000104129	741.956	-0.311774	0.113673	-2.74272	0.00609324	0.242608	DNAJC17
ENSG00000115993	1063.04	-0.567484	0.206853	-2.74341	0.00608048	0.242608	TRAK2
ENSG00000140022	1875.54	-0.510377	0.186138	-2.74192	0.00610807	0.242608	STON2
ENSG00000166261	1428.96	-0.35011	0.127727	-2.74109	0.00612356	0.242608	ZNF202
ENSG00000186235	71.2775	0.928575	0.33873	2.74135	0.00611879	0.242608	AC016757.3
ENSG00000272047	577.299	0.606377	0.221526	2.73728	0.00619501	0.244988	GTF2H5
ENSG00000154265	132.561	-0.864077	0.315999	-2.73443	0.00624886	0.246158	ABCA5
ENSG00000164331	598.795	0.461167	0.168722	2.7333	0.00627038	0.246158	ANKRA2
ENSG00000166997	307.605	-0.408392	0.149332	-2.73478	0.00624214	0.246158	CNPY4
ENSG00000187079	5436.12	0.348858	0.127621	2.73354	0.00626571	0.246158	TEAD1
ENSG00000075461	127.259	-0.575756	0.210828	-2.73093	0.00631557	0.247031	CACNG4
ENSG00000152137	365.771	0.509166	0.186438	2.73102	0.0063139	0.247031	HSPB8
ENSG00000232938	6.9979	3.38677	1.24138	2.72824	0.00636737	0.248208	RPL23AP87
ENSG00000280511	315.241	0.83996	0.307884	2.72817	0.00636875	0.248208	RP11-35J1.2
ENSG00000135077	7.70695	2.05717	0.754825	2.72536	0.00642312	0.249423	HAVCR2
ENSG00000255240	48.9681	0.724259	0.265722	2.72563	0.00641796	0.249423	RP11-142C4.6
ENSG00000200737	7.74337	2.13576	0.784103	2.72382	0.00645314	0.250138	Y
ENSG00000169035	44.4867	0.920925	0.338474	2.72081	0.00651214	0.251971	KLK7
ENSG00000139289	2571.61	0.787986	0.289791	2.71915	0.00654493	0.252785	PHLDA1
ENSG00000272462	89.5682	0.78718	0.289608	2.71809	0.00656604	0.253146	U91328.19
ENSG00000100027	833.545	0.658602	0.242447	2.71648	0.00659803	0.253924	YPEL1
ENSG00000227057	2229.96	-0.361112	0.132986	-2.7154	0.00661957	0.254116	WDR46
ENSG00000275221	1844.32	-0.789721	0.290868	-2.71505	0.00662665	0.254116	HIST1H2AK
ENSG00000158773	1999.7	-0.351115	0.129428	-2.71283	0.0066712	0.255369	USF1
ENSG00000247363	29.9447	0.9076	0.334757	2.71122	0.00670365	0.255435	RP11-637A17.2
ENSG00000271254	269.745	0.69313	0.255638	2.71137	0.00670064	0.255435	AC240274.1
ENSG00000280018	30.5126	-0.832896	0.307231	-2.71098	0.00670853	0.255435	CH507-154B10.2
ENSG00000048405	325.537	0.565355	0.208647	2.70963	0.00673584	0.256021	ZNF800
ENSG00000115738	1226.22	0.934058	0.344894	2.70825	0.00676391	0.256183	ID2
ENSG00000180488	481.929	0.561758	0.207392	2.70868	0.00675511	0.256183	MIGA1
ENSG00000117395	2208.14	-0.557507	0.206048	-2.70571	0.00681575	0.256816	EBNA1BP2
ENSG00000164659	2462.85	0.507984	0.187693	2.70647	0.00680035	0.256816	KIAA1324L
ENSG00000179979	48.3184	0.881002	0.325612	2.70568	0.00681643	0.256816	CRIPAK
ENSG00000167272	796.464	-0.475854	0.175946	-2.70455	0.0068397	0.257147	POP5
ENSG00000226180	45.5164	-0.860721	0.318303	-2.70409	0.00684911	0.257147	RP11-278A23.1
ENSG00000142552	533.029	0.584811	0.216365	2.70289	0.006874	0.257631	RCN3
ENSG00000263597	7.86896	2.02755	0.751053	2.69962	0.00694196	0.259726	MIR3936
ENSG00000123119	278.178	1.30503	0.48363	2.6984	0.00696726	0.26022	NECAB1
ENSG00000281195	309.049	0.468686	0.173749	2.69749	0.00698644	0.260484	ZNF638-IT1
ENSG00000100413	815.47	-0.539015	0.199996	-2.69514	0.00703596	0.260972	POLR3H
ENSG00000160216	258.008	0.850116	0.315486	2.69462	0.00704681	0.260972	AGPAT3
ENSG00000204347	322.573	-1.14257	0.423887	-2.69546	0.00702908	0.260972	BTBD17
ENSG00000267009	14.5364	1.28735	0.477757	2.69457	0.00704804	0.260972	RP11-120M18.2
ENSG00000158555	204.128	-0.558764	0.207471	-2.69322	0.00707655	0.261407	GDPD5
ENSG00000248740	45.1003	0.885209	0.328724	2.69287	0.00708409	0.261407	RP11-328K4.1
ENSG00000170921	567.114	-0.682626	0.25374	-2.69026	0.0071397	0.263007	TANC2
ENSG00000085063	2347.47	0.377826	0.14049	2.68935	0.00715907	0.263154	CD59
ENSG00000233966	151.644	-0.599273	0.222867	-2.68893	0.00716813	0.263154	UBE2SP1
ENSG00000234268	44.1438	-0.76448	0.284372	-2.68831	0.00718148	0.263194	AP000936.1
ENSG00000078549	1202.28	-0.722413	0.268847	-2.68708	0.0072079	0.263714	ADCYAP1R1
ENSG00000120645	145.633	-0.819217	0.305086	-2.6852	0.0072487	0.264371	IQSEC3
ENSG00000134398	70.2961	0.835286	0.311144	2.68456	0.00726246	0.264371	ERN2
ENSG00000266931	68.1822	1.02372	0.381339	2.68455	0.00726273	0.264371	RP11-1252D15.1
ENSG00000174775	583.835	-0.398552	0.148546	-2.68301	0.00729618	0.264849	HRAS
ENSG00000276043	1853.98	-0.702055	0.261686	-2.68282	0.0073005	0.264849	UHRF1
ENSG00000165730	195.818	-0.458158	0.170848	-2.68168	0.0073254	0.264859	STOX1
ENSG00000204644	138.039	1.92866	0.719103	2.68204	0.00731749	0.264859	ZFP57
ENSG00000280347	56.8069	0.77276	0.288429	2.67921	0.00737966	0.266374	AC000123.2
ENSG00000237906	8.6628	1.69238	0.632002	2.67781	0.00741053	0.26704	MUPP
ENSG00000196547	625.883	0.707476	0.264256	2.67724	0.00742324	0.26705	MAN2A2
ENSG00000183688	1489.62	0.425817	0.159164	2.67533	0.00746564	0.268127	RFLNB
ENSG00000165689	2343.08	-0.429259	0.160501	-2.67449	0.00748429	0.268174	SDCCAG3
ENSG00000269938	7.36447	2.25014	0.84144	2.67415	0.00749187	0.268174	RP11-214K3.20
ENSG00000168496	2703.01	-0.37617	0.140814	-2.67139	0.00755383	0.269159	FEN1
ENSG00000170113	1185.11	0.771185	0.288698	2.67125	0.00755691	0.269159	NIPA1
ENSG00000223703	125.391	-1.36595	0.511219	-2.67195	0.00754109	0.269159	AC027612.4
ENSG00000151553	1564.61	0.473425	0.177289	2.67036	0.00757695	0.269426	FAM160B1
ENSG00000105509	44.1391	1.13097	0.424287	2.66559	0.00768542	0.27224	HAS1
ENSG00000152208	3396.47	0.809642	0.303718	2.66577	0.00768113	0.27224	GRID2
ENSG00000206073	12.485	-2.26074	0.84824	-2.66521	0.00769404	0.27224	SERPINB4
ENSG00000187792	309.814	-0.518118	0.194451	-2.66451	0.00770998	0.272356	ZNF70
ENSG00000233954	542.225	0.509851	0.191507	2.66232	0.00776051	0.27338	UQCRHL
ENSG00000272196	74.5235	-1.00616	0.377951	-2.66215	0.00776439	0.27338	HIST2H2AA4
ENSG00000260232	15.3597	1.98652	0.746516	2.66106	0.00778961	0.27382	PWRN4
ENSG00000049246	639.883	0.529144	0.199013	2.65884	0.00784112	0.274576	PER3
ENSG00000256417	39.8805	0.916885	0.344891	2.65848	0.0078494	0.274576	RP11-1038A11.3
ENSG00000276282	9.74707	1.68283	0.632818	2.65927	0.00783111	0.274576	RP11-210K20.5
ENSG00000080007	37.7085	3.34385	1.25999	2.65386	0.00795759	0.275228	DDX43
ENSG00000118160	186.98	0.799279	0.301124	2.65432	0.00794683	0.275228	SLC8A2
ENSG00000189060	2036.72	0.732104	0.275529	2.65708	0.00788197	0.275228	H1F0
ENSG00000196586	2560.48	0.603113	0.227165	2.65495	0.007932	0.275228	MYO6
ENSG00000249518	38.7371	1.34346	0.505834	2.65594	0.00790884	0.275228	CTC-327F10.1
ENSG00000273485	11.4274	-1.29789	0.488666	-2.65598	0.00790787	0.275228	RP11-225H22.7
ENSG00000282965	8.11841	1.91031	0.719601	2.65467	0.00793856	0.275228	RP11-683L23.7
ENSG00000110442	600.908	-0.46293	0.174523	-2.65255	0.00798873	0.275332	COMMD9
ENSG00000124541	2062.09	-0.411561	0.155264	-2.65072	0.00803208	0.275332	RRP36
ENSG00000132031	147.004	0.548029	0.206605	2.65254	0.00798875	0.275332	MATN3
ENSG00000160606	487.816	-0.547495	0.2066	-2.65002	0.00804864	0.275332	TLCD1
ENSG00000227051	1629.57	-0.52691	0.198858	-2.64968	0.00805678	0.275332	C14orf132
ENSG00000228944	19.8566	-0.940208	0.354783	-2.65009	0.00804699	0.275332	AC004485.3
ENSG00000255367	54.0853	0.769907	0.290594	2.64942	0.00806298	0.275332	RP13-726E6.2
ENSG00000276410	2934.41	2.09636	0.791002	2.65026	0.00804309	0.275332	HIST1H2BB
ENSG00000170100	1263.33	-0.473546	0.178827	-2.64807	0.00809531	0.275997	ZNF778
ENSG00000165312	439.634	0.600884	0.227051	2.64647	0.00813366	0.276866	OTUD1
ENSG00000129103	2196.81	0.34385	0.129975	2.6455	0.0081571	0.277225	SUMF2
ENSG00000180574	142.45	2.22317	0.841064	2.64328	0.00821066	0.278167	EIF2S3L
ENSG00000275383	10.6634	1.70191	0.643794	2.64356	0.00820399	0.278167	RP11-615I2.6
ENSG00000199102	478.228	-0.858112	0.324782	-2.64211	0.00823907	0.278691	MIR302C
ENSG00000156471	3524.67	-0.312336	0.118364	-2.63878	0.00832051	0.280563	PTDSS1
ENSG00000198515	46.4361	0.792841	0.300444	2.63889	0.00831774	0.280563	CNGA1
ENSG00000108799	1233.15	0.435737	0.165205	2.63755	0.00835071	0.2807	EZH1
ENSG00000150593	1100.53	0.518052	0.196493	2.63649	0.00837676	0.2807	PDCD4
ENSG00000175283	609.014	-0.475248	0.180199	-2.63735	0.00835571	0.2807	DOLK
ENSG00000260740	17.2547	1.61779	0.613541	2.63681	0.00836887	0.2807	AC026471.6
ENSG00000120262	8.20216	1.6711	0.634584	2.63338	0.00845389	0.282844	CCDC170
ENSG00000270580	49.1022	0.9473	0.360012	2.6313	0.00850577	0.284138	PKD1P6-NPIPP1
ENSG00000163162	1191.24	0.415433	0.157943	2.63027	0.00853164	0.284183	RNF149
ENSG00000164309	129.089	0.81365	0.309411	2.62967	0.00854676	0.284183	CMYA5
ENSG00000182541	1728.07	-0.324789	0.123501	-2.62985	0.00854223	0.284183	LIMK2
ENSG00000261625	12.2568	-1.36642	0.520241	-2.62651	0.00862643	0.28639	RP11-554A11.4
ENSG00000087076	361.783	0.918449	0.350187	2.62274	0.00872268	0.288694	HSD17B14
ENSG00000221539	48.4874	-0.751064	0.286327	-2.6231	0.00871338	0.288694	SNORD99
ENSG00000054356	113.472	0.698048	0.266354	2.62075	0.00877358	0.288949	PTPRN
ENSG00000140688	1585.39	0.480583	0.183441	2.61982	0.00879754	0.288949	C16orf58
ENSG00000152078	208.26	0.584946	0.223272	2.61987	0.00879622	0.288949	TMEM56
ENSG00000173214	965.536	0.497113	0.189732	2.62007	0.00879106	0.288949	MFSD4B
ENSG00000218739	2372.89	0.722265	0.275517	2.62149	0.00875474	0.288949	CEBPZOS
ENSG00000229178	6.42944	2.60697	0.995378	2.61908	0.00881673	0.289138	AC069513.4
ENSG00000275401	25.0672	-0.823661	0.314644	-2.61776	0.0088509	0.289816	RP4-564F22.7
ENSG00000090339	379.58	1.10103	0.420903	2.61588	0.00889969	0.29053	ICAM1
ENSG00000130307	415.79	0.459611	0.175671	2.61632	0.00888833	0.29053	USHBP1
ENSG00000106714	286.594	0.64482	0.246763	2.61312	0.00897206	0.291413	CNTNAP3
ENSG00000159176	1331.88	-0.630686	0.241331	-2.61336	0.00896557	0.291413	CSRP1
ENSG00000215895	9.37655	-1.26807	0.485336	-2.61278	0.00898095	0.291413	RP11-334L9.1
ENSG00000277526	7.47199	-2.06248	0.789357	-2.61286	0.00897887	0.291413	RP11-378A12.1
ENSG00000132434	588.649	-0.419941	0.160766	-2.61212	0.00899819	0.291533	LANCL2
ENSG00000260916	115.634	0.709219	0.271578	2.61148	0.00901518	0.291645	CCPG1
ENSG00000111450	1259.49	0.380812	0.146103	2.60646	0.00914837	0.293261	STX2
ENSG00000118816	6704.53	0.380014	0.145835	2.60578	0.00916647	0.293261	CCNI
ENSG00000124193	5253.76	-0.426689	0.16365	-2.60734	0.00912498	0.293261	SRSF6
ENSG00000129451	112.362	0.729083	0.279778	2.60593	0.0091624	0.293261	KLK10
ENSG00000133519	24.5718	1.14743	0.440001	2.60779	0.00911301	0.293261	ZDHHC8P1
ENSG00000161547	10617.5	-0.45796	0.175696	-2.60654	0.00914612	0.293261	SRSF2
ENSG00000163612	11.0677	1.66356	0.637884	2.60794	0.00910888	0.293261	FAM86KP
ENSG00000169032	3192.8	0.287197	0.11024	2.6052	0.00918195	0.293261	MAP2K1
ENSG00000215374	36.2299	0.93578	0.359227	2.60498	0.00918784	0.293261	FAM66B
ENSG00000201785	18.715	1.11164	0.42682	2.60447	0.00920163	0.293266	SNORD117
ENSG00000272824	8.01425	1.93582	0.743438	2.60387	0.00921765	0.293342	RP6-74O6.6
ENSG00000249210	38.0929	-0.843923	0.324174	-2.6033	0.00923316	0.293402	GAPDHP38
ENSG00000198874	1243.45	-0.281397	0.108157	-2.60174	0.00927508	0.294299	TYW1
ENSG00000081138	95.3472	-1.03183	0.39684	-2.60012	0.00931922	0.294397	CDH7
ENSG00000187531	489.776	-0.421633	0.162125	-2.60066	0.00930433	0.294397	SIRT7
ENSG00000212978	289.362	0.440626	0.169447	2.60038	0.00931207	0.294397	AC016747.3
ENSG00000154175	6.18829	-1.77047	0.681828	-2.59665	0.00941379	0.296514	ABI3BP
ENSG00000259781	647.063	-0.548589	0.211241	-2.59698	0.00940466	0.296514	HMGB1P6
ENSG00000139354	1147.99	0.465375	0.179268	2.59597	0.00943238	0.296665	GAS2L3
ENSG00000196839	760.626	0.380488	0.146632	2.59484	0.00946343	0.297207	ADA
ENSG00000245694	232.888	0.706342	0.272584	2.59129	0.00956181	0.299859	CRNDE
ENSG00000080573	72.3101	0.759753	0.293294	2.59041	0.00958613	0.300084	COL5A3
ENSG00000274090	649.835	0.803685	0.3103	2.59003	0.00959688	0.300084	RP11-415G4.1
ENSG00000106565	15.6555	-1.25799	0.486176	-2.58753	0.00966679	0.300548	TMEM176B
ENSG00000150722	57.1744	1.05982	0.409595	2.5875	0.00966759	0.300548	PPP1R1C
ENSG00000259291	122.714	0.688373	0.265978	2.58808	0.00965131	0.300548	RP11-617F23.1
ENSG00000280118	20.6345	1.93587	0.748135	2.58759	0.00966496	0.300548	RP11-385H1.1
ENSG00000137968	232.279	0.504126	0.19491	2.58645	0.00969693	0.300641	SLC44A5
ENSG00000141485	41.3908	-0.823301	0.31832	-2.5864	0.00969855	0.300641	SLC13A5
ENSG00000269825	147.577	-0.750277	0.290184	-2.58552	0.00972327	0.300974	CTD-3099C6.9
ENSG00000076706	684.745	-0.415722	0.160903	-2.58368	0.00977534	0.301713	MCAM
ENSG00000203288	44.3851	0.92985	0.35991	2.58356	0.00977853	0.301713	RP11-98D18.9
ENSG00000240875	19.6403	-1.18094	0.457164	-2.58319	0.00978923	0.301713	LINC00886
ENSG00000185650	2587.75	0.571198	0.221227	2.58195	0.00982426	0.302359	ZFP36L1
ENSG00000093144	1358.16	0.666067	0.258085	2.58081	0.00985701	0.302487	ECHDC1
ENSG00000174456	486.909	0.432508	0.167561	2.58119	0.00984591	0.302487	C12orf76
ENSG00000259048	67.6591	1.12423	0.435692	2.58033	0.00987059	0.302487	CTD-2058B24.2
ENSG00000065618	41.8738	-0.850416	0.32976	-2.57889	0.00991172	0.302521	COL17A1
ENSG00000101361	9573.51	-0.389961	0.151224	-2.57869	0.00991759	0.302521	NOP56
ENSG00000168807	1559.06	0.34402	0.133442	2.57805	0.00993604	0.302521	SNTB2
ENSG00000171681	9822.24	0.434532	0.168522	2.57848	0.00992358	0.302521	ATF7IP
ENSG00000272316	193.088	0.651314	0.252659	2.57784	0.00994199	0.302521	XXbac-BPGBPG55C20.2
ENSG00000135063	325.084	0.461922	0.179325	2.57589	0.00999818	0.303556	FAM189A2
ENSG00000207280	78.9054	-0.659641	0.256104	-2.57568	0.0100042	0.303556	SNORD20
ENSG00000085982	674.615	-0.392065	0.152284	-2.57457	0.0100366	0.3037	USP40
ENSG00000140386	881.669	0.427359	0.165994	2.57454	0.0100372	0.3037	SCAPER
ENSG00000172247	128.451	0.604426	0.234992	2.57211	0.010108	0.304595	C1QTNF4
ENSG00000204590	2283.61	-0.30121	0.117108	-2.57207	0.0101093	0.304595	GNL1
ENSG00000214553	13.8821	-1.70664	0.663332	-2.57283	0.0100871	0.304595	LRRC37A11P
ENSG00000182481	25195.5	0.400085	0.155791	2.56809	0.0102261	0.307685	KPNA2
ENSG00000041982	299.738	-0.98293	0.383345	-2.56409	0.0103448	0.309524	TNC
ENSG00000111834	25.0697	-0.943085	0.367732	-2.5646	0.0103294	0.309524	RSPH4A
ENSG00000163431	164.04	0.6187	0.241256	2.56449	0.0103327	0.309524	LMOD1
ENSG00000258815	51.0417	0.949858	0.370372	2.5646	0.0103293	0.309524	RP11-408B11.2
ENSG00000229358	169.566	0.659136	0.257137	2.56337	0.0103663	0.309736	DPY19L1P1
ENSG00000116455	1496.27	-0.319567	0.124879	-2.55901	0.0104969	0.313039	WDR77
ENSG00000139597	218.459	0.647037	0.252875	2.55872	0.0105059	0.313039	N4BP2L1
ENSG00000176171	1929.79	0.884755	0.345993	2.55714	0.0105536	0.314023	BNIP3
ENSG00000229980	69.1243	0.719283	0.281388	2.5562	0.0105822	0.314441	TOB1-AS1
ENSG00000081721	674.961	-0.371411	0.145361	-2.55509	0.010616	0.314575	DUSP12
ENSG00000242114	113.05	-0.429889	0.168242	-2.55518	0.0106133	0.314575	MTFP1
ENSG00000124459	881.762	-0.454853	0.178159	-2.55307	0.0106779	0.31571	ZNF45
ENSG00000282164	28.4035	1.40315	0.549634	2.55288	0.0106836	0.31571	PEG13
ENSG00000112667	799.156	0.43477	0.170578	2.5488	0.0108093	0.318987	DNPH1
ENSG00000064655	67.1874	-0.751376	0.294919	-2.54773	0.0108426	0.319188	EYA2
ENSG00000168356	26.1312	-0.774195	0.303889	-2.54763	0.0108458	0.319188	SCN11A
ENSG00000164171	795.39	0.306301	0.120263	2.54692	0.0108678	0.319398	ITGA2
ENSG00000162999	174.807	0.576994	0.22683	2.54373	0.0109676	0.321646	DUSP19
ENSG00000231827	7.42703	-1.59598	0.627468	-2.54352	0.0109742	0.321646	RP11-216N14.5
ENSG00000166900	3636.28	0.402354	0.158231	2.54283	0.0109958	0.321841	STX3
ENSG00000170161	72.8692	-0.677627	0.266775	-2.54007	0.0110829	0.323509	RP11-262H14.4
ENSG00000173281	2221.13	0.762767	0.300288	2.54012	0.0110815	0.323509	PPP1R3B
ENSG00000001561	390.543	0.813143	0.320281	2.53884	0.0111219	0.32418	ENPP4
ENSG00000088002	63.2528	0.64619	0.254754	2.53653	0.0111958	0.32418	SULT2B1
ENSG00000126803	1882.82	0.36388	0.14348	2.53609	0.0112097	0.32418	HSPA2
ENSG00000132522	53.2512	-0.671049	0.264605	-2.53604	0.0112114	0.32418	GPS2
ENSG00000164542	34.1369	1.10961	0.437517	2.53615	0.011208	0.32418	KIAA0895
ENSG00000220804	28.4254	1.0141	0.399551	2.5381	0.0111456	0.32418	AC093642.5
ENSG00000268650	36.7639	1.01277	0.399072	2.5378	0.011155	0.32418	AC068499.10
ENSG00000260464	10.3354	1.51317	0.5968	2.53547	0.0112297	0.324276	RP4-561L24.3
ENSG00000160688	2798.52	-0.329387	0.130068	-2.53241	0.011328	0.325802	FLAD1
ENSG00000165121	169.414	0.45519	0.179734	2.53258	0.0113228	0.325802	RP11-213G2.3
ENSG00000278451	28.0435	0.929889	0.367159	2.53266	0.0113201	0.325802	RP11-923I11.8
ENSG00000067836	655.948	-0.420764	0.166381	-2.52892	0.0114413	0.326641	ROGDI
ENSG00000102931	750.311	0.355413	0.140503	2.52957	0.0114203	0.326641	ARL2BP
ENSG00000104892	122.37	0.498131	0.197023	2.52829	0.0114619	0.326641	KLC3
ENSG00000113212	20.4784	1.07361	0.424321	2.53018	0.0114005	0.326641	PCDHB7
ENSG00000128394	252.49	0.629275	0.248877	2.52846	0.0114563	0.326641	APOBEC3F
ENSG00000136950	898.627	-0.388874	0.15384	-2.52778	0.0114787	0.326641	ARPC5L
ENSG00000197451	11001.8	-0.2997	0.118522	-2.52864	0.0114505	0.326641	HNRNPAB
ENSG00000262663	31.3447	1.23804	0.489753	2.52788	0.0114754	0.326641	RP11-497H17.1
ENSG00000153902	156.488	0.809936	0.320602	2.5263	0.0115272	0.327195	LGI4
ENSG00000280088	125.271	0.526534	0.208425	2.52626	0.0115285	0.327195	RP11-135F9.3
ENSG00000165671	14964.4	-0.267517	0.105956	-2.52479	0.0115768	0.328132	NSD1
ENSG00000117868	7260.76	0.926801	0.367247	2.52365	0.0116144	0.32829	ESYT2
ENSG00000128274	352.54	0.76107	0.301625	2.52323	0.0116282	0.32829	A4GALT
ENSG00000231007	62.1782	3.14386	1.24562	2.52394	0.0116048	0.32829	CDC20P1
ENSG00000178927	1307.45	-0.433387	0.171806	-2.52253	0.0116514	0.328516	C17orf62
ENSG00000196116	137.55	0.547283	0.21702	2.52181	0.0116752	0.328754	TDRD7
ENSG00000122965	2453.58	-0.393949	0.156254	-2.52121	0.0116952	0.328886	RBM19
ENSG00000198189	557.015	0.678679	0.269498	2.51831	0.011792	0.329126	HSD17B11
ENSG00000214946	24.4777	1.03396	0.410488	2.51886	0.0117737	0.329126	TBC1D26
ENSG00000229931	23.6767	0.937521	0.372218	2.51874	0.0117775	0.329126	RP1-151F17.1
ENSG00000232320	8.51432	1.84973	0.734076	2.51981	0.0117418	0.329126	AC009299.5
ENSG00000238363	302.654	-0.927917	0.368551	-2.51775	0.0118108	0.329126	SNORA13
ENSG00000240207	50.3896	0.62316	0.247454	2.51828	0.0117929	0.329126	RP11-379F4.4
ENSG00000279191	8.90213	-1.27103	0.504756	-2.51811	0.0117987	0.329126	RP11-803D5.1
ENSG00000068903	389.225	0.443222	0.176163	2.51598	0.0118703	0.329504	SIRT2
ENSG00000144554	6380.35	-0.252874	0.100497	-2.51624	0.0118614	0.329504	FANCD2
ENSG00000147894	1845.92	0.65096	0.258691	2.51637	0.0118572	0.329504	C9orf72
ENSG00000267102	98.65	0.623245	0.248064	2.51244	0.0119899	0.332395	RP11-686D22.7
ENSG00000109906	13.5835	1.37158	0.546039	2.51186	0.0120095	0.332489	ZBTB16
ENSG00000154721	211.46	-0.51277	0.204285	-2.51007	0.0120706	0.332489	JAM2
ENSG00000254610	25.1392	1.25846	0.501318	2.51031	0.0120626	0.332489	RP5-903G2.2
ENSG00000262714	7.59253	2.14295	0.853662	2.5103	0.0120627	0.332489	RP11-44F14.8
ENSG00000279560	288.794	2.18453	0.869847	2.5114	0.0120254	0.332489	AC007326.1
ENSG00000131069	1220.77	0.635893	0.253577	2.50769	0.0121524	0.334316	ACSS2
ENSG00000103196	382.873	0.47415	0.189197	2.50612	0.0122064	0.334945	CRISPLD2
ENSG00000254180	24.8244	1.50077	0.598788	2.50635	0.0121986	0.334945	AB015752.3
ENSG00000184887	340.877	-0.600666	0.239828	-2.50457	0.0122599	0.33513	BTBD6
ENSG00000228817	9.37854	-1.22623	0.489685	-2.50412	0.0122755	0.33513	BACH1-IT2
ENSG00000253305	229.22	0.484773	0.193564	2.50446	0.0122637	0.33513	PCDHGB6
ENSG00000264343	28.8635	1.075	0.42916	2.5049	0.0122486	0.33513	NOTCH2NL
ENSG00000144290	47.0064	1.00697	0.402493	2.50184	0.0123551	0.335457	SLC4A10
ENSG00000224729	176.607	0.498146	0.199136	2.50154	0.0123654	0.335457	PCOLCE-AS1
ENSG00000250686	30.6586	1.26476	0.505307	2.50295	0.0123165	0.335457	RP1-240B8.3
ENSG00000267662	42.4305	1.12606	0.450058	2.50204	0.0123481	0.335457	AC007796.1
ENSG00000269887	38.7298	1.034	0.413301	2.50181	0.0123559	0.335457	RP11-477H21.2
ENSG00000126456	2043.56	-0.281032	0.112423	-2.49977	0.0124274	0.336715	IRF3
ENSG00000077157	1201.07	0.470031	0.188152	2.49815	0.0124844	0.337833	PPP1R12B
ENSG00000104093	2065.57	0.540635	0.216538	2.49672	0.0125347	0.338769	DMXL2
ENSG00000232871	17.7812	-1.1614	0.465254	-2.49628	0.0125505	0.33877	SEC1P
ENSG00000250251	1047.02	0.556639	0.22304	2.49569	0.0125713	0.338906	PKD1P6
ENSG00000089195	799.113	-0.437332	0.175413	-2.49316	0.0126612	0.340903	TRMT6
ENSG00000142686	383.781	-0.597526	0.239737	-2.49242	0.0126875	0.341182	C1orf216
ENSG00000256139	33.6829	0.905376	0.363458	2.491	0.0127383	0.34212	RP11-968O1.5
ENSG00000071282	617.109	-0.700377	0.281319	-2.48962	0.0127879	0.342751	LMCD1
ENSG00000166822	2597.35	0.496263	0.19941	2.48866	0.0128225	0.342751	TMEM170A
ENSG00000203896	20.1709	-1.25533	0.504435	-2.48858	0.0128255	0.342751	LIME1
ENSG00000271755	23.7121	1.19472	0.480025	2.48887	0.0128151	0.342751	RP1-153G14.4
ENSG00000160214	1914.64	-0.307967	0.123821	-2.4872	0.0128751	0.3428	RRP1
ENSG00000175197	256.365	1.04499	0.420032	2.48787	0.0128511	0.3428	DDIT3
ENSG00000178031	78.7523	-0.911452	0.366434	-2.48735	0.0128697	0.3428	ADAMTSL1
ENSG00000260230	88.5239	0.730676	0.293851	2.48655	0.0128988	0.343005	FRRS1L
ENSG00000178075	167.441	0.717617	0.288684	2.48583	0.0129251	0.343281	GRAMD1C
ENSG00000280234	8.69771	1.77056	0.712984	2.48331	0.0130166	0.345286	RP11-145P16.2
ENSG00000079112	12.1682	1.59124	0.641046	2.48225	0.0130554	0.345463	CDH17
ENSG00000171885	184.607	0.781834	0.314931	2.48255	0.0130444	0.345463	AQP4
ENSG00000157353	282.067	0.549061	0.22124	2.48174	0.0130743	0.345536	FUK
ENSG00000163902	10547.2	-0.308847	0.124485	-2.481	0.0131016	0.345833	RPN1
ENSG00000181264	633.716	0.416992	0.168186	2.47934	0.0131624	0.347013	TMEM136
ENSG00000135763	2426.5	-0.375826	0.151962	-2.47316	0.0133925	0.348355	URB2
ENSG00000144724	9227.64	0.343623	0.138808	2.47553	0.013304	0.348355	PTPRG
ENSG00000154736	62.4626	-0.916629	0.370546	-2.47373	0.0133711	0.348355	ADAMTS5
ENSG00000167461	2435.56	-0.292417	0.118157	-2.47483	0.01333	0.348355	RAB8A
ENSG00000185156	134.821	0.532045	0.21484	2.47647	0.0132687	0.348355	MFSD6L
ENSG00000185344	2334.41	-0.343758	0.138924	-2.47443	0.0133449	0.348355	ATP6V0A2
ENSG00000186301	109.467	0.736209	0.297644	2.47345	0.0133815	0.348355	MST1P2
ENSG00000187118	599.255	0.391234	0.157948	2.47698	0.0132499	0.348355	CMC1
ENSG00000203852	70.1105	-0.920326	0.371901	-2.47466	0.0133364	0.348355	HIST2H3A
ENSG00000221866	150.194	-0.581128	0.235066	-2.47219	0.0134289	0.348355	PLXNA4
ENSG00000235726	41.4489	1.1566	0.467485	2.47409	0.0133574	0.348355	AC010148.1
ENSG00000258053	57.1164	0.792551	0.320625	2.47189	0.01344	0.348355	CTD-2021H9.3
ENSG00000266402	55.5094	-0.551656	0.223167	-2.47194	0.0134382	0.348355	SNHG25
ENSG00000279711	24.9173	-0.835361	0.337724	-2.47351	0.0133795	0.348355	AP004782.1
ENSG00000111276	1680.07	0.584416	0.236524	2.47086	0.0134789	0.348943	CDKN1B
ENSG00000134698	1155.86	0.358552	0.145223	2.46897	0.0135504	0.349113	AGO4
ENSG00000183317	42.6734	0.951747	0.385459	2.46913	0.0135443	0.349113	EPHA10
ENSG00000261512	72.7467	-0.705782	0.285778	-2.46969	0.0135232	0.349113	RP11-46D6.1
ENSG00000275611	28.1272	0.91389	0.370066	2.46953	0.0135289	0.349113	RP11-291I6.2
ENSG00000049239	912.944	0.76052	0.308561	2.46473	0.0137116	0.349719	H6PD
ENSG00000085465	133.099	0.871883	0.354141	2.46197	0.0138177	0.349719	OVGP1
ENSG00000105676	2385.08	-0.312043	0.126655	-2.46373	0.01375	0.349719	ARMC6
ENSG00000116991	1416.33	-0.663884	0.269582	-2.46264	0.0137918	0.349719	SIPA1L2
ENSG00000118473	38.6625	0.786419	0.319174	2.46392	0.0137426	0.349719	SGIP1
ENSG00000128228	375.266	-0.40384	0.164023	-2.46209	0.0138129	0.349719	SDF2L1
ENSG00000142166	601.767	0.380402	0.154445	2.46303	0.013777	0.349719	IFNAR1
ENSG00000146276	15.757	1.19919	0.486611	2.46436	0.0137256	0.349719	GABRR1
ENSG00000148655	13.8164	1.3574	0.55032	2.46656	0.0136419	0.349719	C10orf11
ENSG00000164398	53.6676	0.658427	0.266829	2.4676	0.0136022	0.349719	ACSL6
ENSG00000166664	22.4406	1.15628	0.469484	2.46288	0.0137827	0.349719	CHRFAM7A
ENSG00000168818	709.611	-0.419633	0.170423	-2.4623	0.0138048	0.349719	STX18
ENSG00000177807	19.7036	-1.14723	0.46514	-2.46642	0.013647	0.349719	KCNJ10
ENSG00000214842	21.7538	1.09194	0.443043	2.46464	0.013715	0.349719	RAD51AP2
ENSG00000278875	101.587	0.933433	0.379037	2.46264	0.0137916	0.349719	CTC-439O9.1
ENSG00000237152	8.05899	1.65213	0.671196	2.46148	0.0138366	0.349785	DLEU7-AS1
ENSG00000106305	1782.13	-0.356975	0.145332	-2.45626	0.0140391	0.351598	AIMP2
ENSG00000110628	170.164	0.715188	0.291053	2.45724	0.0140007	0.351598	SLC22A18
ENSG00000125246	445.793	0.458618	0.186657	2.45701	0.0140099	0.351598	CLYBL
ENSG00000163040	330.361	-0.460448	0.187241	-2.45912	0.0139277	0.351598	CCDC74A
ENSG00000169750	2203.31	-0.353098	0.143707	-2.45706	0.0140078	0.351598	RAC3
ENSG00000172671	743.383	0.313117	0.127436	2.45705	0.0140083	0.351598	ZFAND4
ENSG00000183160	12.6859	-1.3106	0.533447	-2.45684	0.0140163	0.351598	TMEM119
ENSG00000272030	15.282	-1.0694	0.435302	-2.45668	0.0140228	0.351598	RP1-178F15.4
ENSG00000224039	26.4529	1.19329	0.486026	2.45519	0.014081	0.352238	AC091493.1
ENSG00000131558	5572.77	0.294855	0.120176	2.45353	0.0141463	0.353461	EXOC4
ENSG00000137628	545.196	0.786152	0.320473	2.4531	0.0141629	0.353466	DDX60
ENSG00000105647	6.99581	-1.50661	0.614619	-2.45129	0.0142346	0.354023	PIK3R2
ENSG00000204922	822.984	-0.385332	0.157159	-2.45186	0.0142122	0.354023	UQCC3
ENSG00000259820	454.572	0.537811	0.219376	2.45156	0.014224	0.354023	AC083843.1
ENSG00000261654	31.0339	0.919903	0.375453	2.45012	0.0142811	0.354767	RP11-96K19.4
ENSG00000276115	40.8198	0.707946	0.289031	2.44938	0.0143103	0.355084	RP11-817I4.2
ENSG00000023902	1285.91	-0.422361	0.172471	-2.44887	0.0143304	0.355172	PLEKHO1
ENSG00000077348	983.381	-0.347432	0.141905	-2.44833	0.0143519	0.355296	EXOSC5
ENSG00000033867	11738.8	0.501271	0.205048	2.44465	0.0144991	0.356071	SLC4A7
ENSG00000105668	10.7631	1.6682	0.681713	2.44707	0.0144024	0.356071	UPK1A
ENSG00000112796	789.369	0.469851	0.192292	2.44342	0.0145487	0.356071	ENPP5
ENSG00000139624	1259.74	-0.289126	0.118214	-2.44578	0.014454	0.356071	CERS5
ENSG00000141682	5769.2	0.696158	0.284639	2.44576	0.0144548	0.356071	PMAIP1
ENSG00000163191	688.58	0.58102	0.237766	2.44366	0.014539	0.356071	S100A11
ENSG00000174482	174.693	0.65473	0.26774	2.4454	0.0144693	0.356071	LINGO2
ENSG00000228828	38.4025	1.74408	0.713744	2.44357	0.0145428	0.356071	TLK2P2
ENSG00000248774	96.5137	0.819869	0.335337	2.44491	0.0144887	0.356071	RP11-798M19.3
ENSG00000278983	15.0687	-1.09039	0.446187	-2.44379	0.0145338	0.356071	RP11-426J5.3
ENSG00000155858	830.955	0.484254	0.198297	2.44206	0.0146037	0.356115	LSM11
ENSG00000170469	179.808	-0.405884	0.166228	-2.44174	0.0146167	0.356115	SPATA24
ENSG00000188266	116.088	0.583201	0.23884	2.44181	0.0146139	0.356115	HYKK
ENSG00000197429	292.633	0.508784	0.208336	2.44213	0.0146007	0.356115	IPP
ENSG00000128294	2762.53	0.336671	0.138215	2.43586	0.0148564	0.358488	TPST2
ENSG00000133665	93.9176	-0.581385	0.238587	-2.43678	0.0148186	0.358488	DYDC2
ENSG00000139410	33.8345	-1.53934	0.632087	-2.43532	0.0148784	0.358488	SDSL
ENSG00000213938	25.1798	-0.786916	0.323084	-2.43564	0.0148654	0.358488	SEPHS1P6
ENSG00000217555	24.6022	0.94528	0.388215	2.43494	0.0148942	0.358488	CKLF
ENSG00000230561	19.1138	1.2473	0.511487	2.43859	0.0147449	0.358488	CCDC192
ENSG00000235454	11.1277	-1.37611	0.565169	-2.43486	0.0148974	0.358488	HAUS6P3
ENSG00000246982	37.6229	0.858438	0.352281	2.4368	0.0148178	0.358488	RP1-179N16.6
ENSG00000268655	11.1564	1.57583	0.647084	2.43527	0.0148805	0.358488	CTB-60B18.10
ENSG00000274993	58.649	0.683995	0.28077	2.43614	0.014845	0.358488	RP11-395B7.2
ENSG00000278861	20.2309	1.05176	0.431755	2.43602	0.0148498	0.358488	RP11-338K17.6
ENSG00000247498	51.0149	4.64195	1.90746	2.43357	0.0149507	0.359368	RP11-392P7.6
ENSG00000040531	401.347	-0.439945	0.180818	-2.43308	0.014971	0.359454	CTNS
ENSG00000006459	2110.76	0.4297	0.17827	2.41039	0.0159355	0.360045	KDM7A
ENSG00000013503	1040.18	-0.441602	0.18207	-2.42545	0.0152893	0.360045	POLR3B
ENSG00000013588	39.1426	1.2176	0.502433	2.42341	0.0153756	0.360045	GPRC5A
ENSG00000044090	1755.9	0.569371	0.236034	2.41224	0.0158548	0.360045	CUL7
ENSG00000053372	2220.24	-0.377094	0.156294	-2.41272	0.0158341	0.360045	MRTO4
ENSG00000069849	4524.84	0.262405	0.108099	2.42746	0.0152051	0.360045	ATP1B3
ENSG00000070159	328.81	0.41129	0.169785	2.42242	0.0154177	0.360045	PTPN3
ENSG00000080823	43.2634	-0.663822	0.273225	-2.42958	0.0151162	0.360045	MOK
ENSG00000085999	1291.22	-0.336823	0.138828	-2.42619	0.0152582	0.360045	RAD54L
ENSG00000089091	295.9	-0.407552	0.167624	-2.43134	0.015043	0.360045	DZANK1
ENSG00000100626	258.982	-0.487528	0.200749	-2.42855	0.0151595	0.360045	GALNT16
ENSG00000103226	285.569	0.541726	0.22279	2.43155	0.0150342	0.360045	NOMO3
ENSG00000103269	80.6999	0.526861	0.217211	2.42557	0.0152845	0.360045	RHBDL1
ENSG00000105618	2887.55	-0.278843	0.115038	-2.42393	0.0153538	0.360045	PRPF31
ENSG00000106013	21.2089	3.46062	1.4338	2.41359	0.015796	0.360045	ANKRD7
ENSG00000110148	199.836	-0.779574	0.322014	-2.42093	0.0154808	0.360045	CCKBR
ENSG00000110975	114.865	-0.766434	0.317672	-2.41266	0.0158366	0.360045	SYT10
ENSG00000111490	110.989	-0.510169	0.211562	-2.41144	0.0158895	0.360045	TBC1D30
ENSG00000112379	3344.54	0.562934	0.233576	2.41007	0.0159496	0.360045	ARFGEF3
ENSG00000112406	827.823	0.648497	0.268783	2.41272	0.015834	0.360045	HECA
ENSG00000116761	1172.62	0.410553	0.170175	2.41253	0.0158423	0.360045	CTH
ENSG00000118762	2020.75	-0.341823	0.141693	-2.41243	0.0158468	0.360045	PKD2
ENSG00000118997	15.9067	-1.0657	0.441994	-2.41112	0.0159038	0.360045	DNAH7
ENSG00000124743	69.4544	0.633631	0.261507	2.423	0.015393	0.360045	KLHL31
ENSG00000126870	1855.55	0.836177	0.346572	2.41271	0.0158344	0.360045	WDR60
ENSG00000129003	4221.75	0.685296	0.284063	2.41248	0.0158444	0.360045	VPS13C
ENSG00000137821	509.073	-0.503049	0.208592	-2.41164	0.0158809	0.360045	LRRC49
ENSG00000138593	2623.06	0.381309	0.157401	2.42254	0.0154125	0.360045	SECISBP2L
ENSG00000141376	802.492	0.541845	0.224527	2.41327	0.01581	0.360045	BCAS3
ENSG00000141543	4310.4	-0.309677	0.128322	-2.41328	0.0158095	0.360045	EIF4A3
ENSG00000142621	91.9177	-0.745834	0.307504	-2.42544	0.0152897	0.360045	FHAD1
ENSG00000150627	343.049	0.644082	0.265958	2.42174	0.0154464	0.360045	WDR17
ENSG00000154760	2114.97	0.583882	0.240195	2.43087	0.0150626	0.360045	SLFN13
ENSG00000162598	11.4135	1.60488	0.661799	2.42503	0.0153073	0.360045	C1orf87
ENSG00000163449	178.138	-0.475863	0.196299	-2.42418	0.0153431	0.360045	TMEM169
ENSG00000163683	1360.32	0.676325	0.28034	2.41252	0.0158429	0.360045	SMIM14
ENSG00000165996	393.205	-0.62841	0.259629	-2.42042	0.0155028	0.360045	HACD1
ENSG00000168286	1737.28	-0.329585	0.136737	-2.41036	0.0159368	0.360045	THAP11
ENSG00000173612	9.27969	1.58149	0.655703	2.4119	0.0158694	0.360045	GPRC6A
ENSG00000174007	95.2492	-0.503815	0.208639	-2.41477	0.0157454	0.360045	CEP19
ENSG00000179978	20.4062	0.908814	0.375221	2.42207	0.0154322	0.360045	RP11-1319K7.1
ENSG00000184669	28.6243	-0.747009	0.309879	-2.41064	0.0159244	0.360045	OR7E14P
ENSG00000189409	77.2778	0.832781	0.345094	2.4132	0.015813	0.360045	MMP23B
ENSG00000198131	1940.8	-0.358747	0.147781	-2.42757	0.0152006	0.360045	ZNF544
ENSG00000198799	3190.35	0.503763	0.20851	2.41602	0.0156913	0.360045	LRIG2
ENSG00000206418	2157.11	0.656118	0.271095	2.42025	0.0155097	0.360045	RAB12
ENSG00000224505	53.1635	0.665279	0.275115	2.41818	0.0155983	0.360045	AC002117.1
ENSG00000225192	9.84291	2.35643	0.97743	2.41085	0.0159154	0.360045	ZNF33BP1
ENSG00000227199	187.887	0.410669	0.168916	2.4312	0.015049	0.360045	ST7-AS1
ENSG00000230212	13.1782	-1.23918	0.512892	-2.41606	0.0156893	0.360045	AP000688.14
ENSG00000248610	6.05248	-1.68364	0.694603	-2.42389	0.0153553	0.360045	HSPA8P4
ENSG00000259065	14.0341	1.73396	0.714331	2.4274	0.0152077	0.360045	RP5-1021I20.1
ENSG00000260362	126.258	2.71169	1.11951	2.42221	0.0154263	0.360045	RP11-297M9.1
ENSG00000260711	105.395	0.543422	0.224986	2.41536	0.0157197	0.360045	RP11-747H7.3
ENSG00000270460	10.0667	1.5823	0.651897	2.42723	0.0152147	0.360045	RP11-796E10.1
ENSG00000272654	67.9505	0.576062	0.238069	2.41972	0.0155323	0.360045	RP11-422P24.11
ENSG00000274452	26.6993	3.65043	1.51366	2.41166	0.0158799	0.360045	U2
ENSG00000136279	1496.14	-0.440436	0.182822	-2.40909	0.0159923	0.360566	DBNL
ENSG00000187688	69.9684	-0.502753	0.208717	-2.40878	0.0160061	0.360566	TRPV2
ENSG00000134285	445.875	-0.429393	0.178392	-2.40702	0.0160834	0.36098	FKBP11
ENSG00000139154	1856.84	0.505478	0.209995	2.4071	0.0160798	0.36098	AEBP2
ENSG00000149922	91.8133	0.761594	0.316365	2.40733	0.0160697	0.36098	TBX6
ENSG00000269974	52.2431	1.06122	0.440919	2.40683	0.0160917	0.36098	RP11-932O9.10
ENSG00000120160	36.1044	1.01983	0.423881	2.40595	0.0161306	0.361477	EQTN
ENSG00000067369	5949.97	-0.413745	0.172019	-2.40523	0.0161623	0.361757	TP53BP1
ENSG00000217094	60.1632	-0.853799	0.355024	-2.4049	0.0161767	0.361757	PPIAP31
ENSG00000160190	1199.72	-0.34748	0.144524	-2.4043	0.0162034	0.36195	SLC37A1
ENSG00000165113	367.826	0.568935	0.236667	2.40395	0.016219	0.36195	GKAP1
ENSG00000124444	275.999	-0.369723	0.153844	-2.40324	0.0162505	0.362278	ZNF576
ENSG00000065328	3337.6	-0.396145	0.164983	-2.40113	0.0163444	0.362867	MCM10
ENSG00000074935	868.769	0.50444	0.21003	2.40175	0.0163169	0.362867	TUBE1
ENSG00000122741	891.538	0.332687	0.138495	2.40215	0.0162989	0.362867	DCAF10
ENSG00000138767	1610.32	0.597062	0.248622	2.40148	0.0163289	0.362867	CNOT6L
ENSG00000129472	1160.26	0.390771	0.162863	2.39938	0.0164227	0.363105	RAB2B
ENSG00000133805	225.161	-0.624543	0.260185	-2.40038	0.0163779	0.363105	AMPD3
ENSG00000158828	1371.67	0.582269	0.242658	2.39954	0.0164156	0.363105	PINK1
ENSG00000257790	43.3844	-0.717495	0.29902	-2.39949	0.016418	0.363105	EIF4A1P4
ENSG00000135829	20068	-0.350107	0.145983	-2.39827	0.0164726	0.363834	DHX9
ENSG00000230438	11.992	1.32307	0.551928	2.39718	0.0165218	0.364547	SERPINB9P1
ENSG00000011009	3482.8	-0.349664	0.145894	-2.3967	0.0165435	0.364652	LYPLA2
ENSG00000086475	31697.1	-0.323252	0.134947	-2.39539	0.0166025	0.364859	SEPHS1
ENSG00000130528	309.242	0.644776	0.269174	2.39539	0.0166029	0.364859	HRC
ENSG00000166582	3006.74	-0.39269	0.163945	-2.39525	0.0166088	0.364859	CENPV
ENSG00000213995	1042.93	-0.315955	0.131964	-2.39424	0.0166546	0.364859	NAXD
ENSG00000239305	507.245	0.369909	0.154498	2.39427	0.0166535	0.364859	RNF103
ENSG00000266217	31.5817	1.11179	0.464274	2.39469	0.0166345	0.364859	CTSLP2
ENSG00000113369	2106.05	0.716145	0.299199	2.39354	0.0166869	0.364934	ARRDC3
ENSG00000188050	21.1949	1.27952	0.5346	2.39342	0.016692	0.364934	RNF133
ENSG00000197647	151.601	0.643966	0.269169	2.39242	0.0167377	0.365562	ZNF433
ENSG00000114767	1431.66	-0.328495	0.137363	-2.39143	0.0167827	0.365803	RRP9
ENSG00000181513	406.825	0.423307	0.176991	2.39169	0.016771	0.365803	ACBD4
ENSG00000085552	568.046	-0.569629	0.238498	-2.3884	0.0169217	0.368458	IGSF9
ENSG00000115904	2161.87	0.438631	0.183696	2.38781	0.016949	0.36868	SOS1
ENSG00000161267	468.78	-0.366968	0.153743	-2.38689	0.0169917	0.368861	BDH1
ENSG00000235823	553.636	0.383619	0.160701	2.38716	0.0169791	0.368861	OLMALINC
ENSG00000279845	18.9329	1.01653	0.426056	2.38591	0.0170368	0.369468	RP11-6L6.4
ENSG00000160818	1593.19	-0.371239	0.155689	-2.38449	0.0171027	0.370525	GPATCH4
ENSG00000163219	72.6281	0.667886	0.280235	2.38331	0.0171579	0.370973	ARHGAP25
ENSG00000261437	56.2498	0.591731	0.248246	2.38365	0.017142	0.370973	RP11-22C11.2
ENSG00000198382	1160.55	0.572697	0.240385	2.38241	0.0171996	0.371501	UVRAG
ENSG00000143627	83.1195	0.523349	0.219866	2.38031	0.0172982	0.372882	PKLR
ENSG00000214050	283.188	0.400815	0.168373	2.38051	0.0172886	0.372882	FBXO16
ENSG00000105248	839.829	-0.298264	0.125366	-2.37915	0.0173524	0.37291	CCDC94
ENSG00000171456	796.224	-0.524048	0.220212	-2.37974	0.0173248	0.37291	ASXL1
ENSG00000182473	4258.1	-0.391397	0.164505	-2.37924	0.0173486	0.37291	EXOC7
ENSG00000198818	986.688	0.432109	0.181649	2.37881	0.0173688	0.37291	SFT2D1
ENSG00000136450	14317.4	-0.335065	0.140971	-2.37683	0.0174621	0.373657	SRSF1
ENSG00000157766	41.1873	-0.78119	0.328751	-2.37623	0.0174905	0.373657	ACAN
ENSG00000172379	493.262	-0.447897	0.188478	-2.37639	0.0174829	0.373657	ARNT2
ENSG00000204839	45.7572	0.769336	0.323662	2.37697	0.0174555	0.373657	MROH6
ENSG00000279175	18.9933	1.09836	0.462054	2.37712	0.0174485	0.373657	CTA-414D7.1
ENSG00000103037	1113.61	-0.397811	0.167443	-2.37579	0.0175112	0.373729	SETD6
ENSG00000170381	77.065	-0.653377	0.27507	-2.37531	0.0175342	0.373848	SEMA3E
ENSG00000231925	1287.65	0.482423	0.203186	2.37429	0.0175825	0.374508	TAPBP
ENSG00000260941	42.3086	0.912988	0.384619	2.37375	0.0176086	0.374693	LINC00622
ENSG00000217128	1844.69	0.507853	0.213999	2.37316	0.0176366	0.37485	FNIP1
ENSG00000234132	11.5684	-1.19616	0.504102	-2.37286	0.0176508	0.37485	RP11-168O16.2
ENSG00000172340	2979.39	0.309918	0.13068	2.37158	0.0177121	0.375779	SUCLG2
ENSG00000101445	1030.88	0.391372	0.16516	2.36966	0.0178046	0.37601	PPP1R16B
ENSG00000110104	1210.99	-0.351364	0.148329	-2.36881	0.0178453	0.37601	CCDC86
ENSG00000160097	25.3296	-0.921549	0.388791	-2.37029	0.017774	0.37601	FNDC5
ENSG00000186615	253.119	0.363459	0.153366	2.36988	0.0177941	0.37601	KTN1-AS1
ENSG00000205899	6.98899	-1.39998	0.590933	-2.36911	0.017831	0.37601	BHLHA9
ENSG00000223502	8.97848	1.49666	0.631418	2.37032	0.0177728	0.37601	RP11-96B5.3
ENSG00000229320	200.935	-0.427464	0.180454	-2.36883	0.0178446	0.37601	KRT8P12
ENSG00000144847	133.136	0.488179	0.206179	2.36774	0.0178971	0.376015	IGSF11
ENSG00000158445	140.887	0.709374	0.299644	2.36739	0.0179141	0.376015	KCNB1
ENSG00000160789	1397.79	-0.299776	0.126629	-2.36736	0.0179155	0.376015	LMNA
ENSG00000237036	171.376	0.501143	0.211616	2.36817	0.0178764	0.376015	ZEB1-AS1
ENSG00000023892	435.853	0.425157	0.179628	2.36687	0.017939	0.376143	DEF6
ENSG00000183684	5039.65	-0.308301	0.130325	-2.36562	0.0179999	0.377051	ALYREF
ENSG00000089177	946.056	0.296584	0.125491	2.36338	0.0181089	0.378597	KIF16B
ENSG00000225548	81.4642	0.616192	0.260724	2.36339	0.0181087	0.378597	AC098973.2
ENSG00000096746	2891.68	0.473243	0.20034	2.3622	0.0181669	0.379073	HNRNPH3
ENSG00000270055	19.3848	0.998697	0.422771	2.36226	0.0181638	0.379073	CTD-3092A11.2
ENSG00000259172	39.5879	-0.64347	0.272626	-2.36026	0.018262	0.380689	RP11-299G20.2
ENSG00000204472	99.3995	-0.653218	0.276836	-2.35959	0.0182954	0.381015	AIF1
ENSG00000123700	125.295	0.626368	0.265765	2.35685	0.0184307	0.383451	KCNJ2
ENSG00000148291	580.734	-0.352408	0.149547	-2.3565	0.018448	0.383451	SURF2
ENSG00000122335	1119.44	0.426651	0.181087	2.35606	0.0184701	0.38354	SERAC1
ENSG00000265972	994.794	1.8589	0.789721	2.35387	0.0185789	0.385427	TXNIP
ENSG00000140416	11545.3	-0.45067	0.191512	-2.35322	0.0186115	0.385732	TPM1
ENSG00000090612	1697.44	-0.642872	0.273442	-2.35103	0.0187213	0.387012	ZNF268
ENSG00000118894	944.126	-0.354748	0.150933	-2.35037	0.0187548	0.387012	EEF2KMT
ENSG00000167861	376.454	0.700567	0.298002	2.35088	0.0187289	0.387012	HID1
ENSG00000186141	1023.33	-0.357766	0.152251	-2.34985	0.0187812	0.387012	POLR3C
ENSG00000224905	92.3073	0.558274	0.237572	2.34992	0.0187776	0.387012	AP001347.6
ENSG00000245060	153.668	0.378705	0.161126	2.35036	0.0187553	0.387012	LINC00847
ENSG00000183621	131.717	0.528428	0.224965	2.34894	0.0188272	0.387217	ZNF438
ENSG00000184117	8354.74	0.284759	0.121223	2.34905	0.0188214	0.387217	NIPSNAP1
ENSG00000277103	736.162	-0.653369	0.278207	-2.3485	0.0188493	0.387303	RP11-520B13.8
ENSG00000100156	21.3146	1.0408	0.443262	2.34805	0.0188718	0.387394	SLC16A8
ENSG00000144227	75.4504	-0.723631	0.308329	-2.34694	0.0189281	0.388179	NXPH2
ENSG00000076242	2352.54	-0.370444	0.157957	-2.34522	0.0190158	0.38838	MLH1
ENSG00000164627	39.466	-0.880355	0.375411	-2.34504	0.019025	0.38838	KIF6
ENSG00000189283	90.4612	0.697566	0.297472	2.34498	0.0190281	0.38838	FHIT
ENSG00000265460	9.49562	-1.2807	0.545824	-2.34636	0.0189579	0.38838	RP11-690G19.4
ENSG00000267197	26.3947	-0.844411	0.359956	-2.34587	0.0189826	0.38838	CTC-429L19.3
ENSG00000157823	713.815	0.395826	0.168877	2.34388	0.0190844	0.38879	AP3S2
ENSG00000203666	227.486	-0.410351	0.175049	-2.34421	0.0190675	0.38879	EFCAB2
ENSG00000101695	1142.91	0.442429	0.188922	2.34186	0.019188	0.389425	RNF125
ENSG00000134539	18.5394	1.46353	0.624766	2.34252	0.019154	0.389425	KLRD1
ENSG00000167900	1841.95	-0.334644	0.142866	-2.34237	0.0191618	0.389425	TK1
ENSG00000253583	7.08488	1.79604	0.766912	2.34192	0.0191851	0.389425	RP11-573J24.1
ENSG00000116095	962.505	0.363548	0.155453	2.33863	0.0193544	0.391668	PLEKHA3
ENSG00000119333	1824.73	-0.462066	0.19771	-2.33709	0.0194346	0.391668	WDR34
ENSG00000148926	1955.82	-0.56539	0.241916	-2.33713	0.0194323	0.391668	ADM
ENSG00000165912	1323.17	-0.426983	0.182713	-2.33691	0.0194441	0.391668	PACSIN3
ENSG00000169744	3154.72	0.346169	0.148021	2.33865	0.0193535	0.391668	LDB2
ENSG00000184381	601.282	0.699907	0.299347	2.33811	0.0193813	0.391668	PLA2G6
ENSG00000226314	89.1133	0.640833	0.273979	2.33899	0.019336	0.391668	ZNF192P1
ENSG00000259967	6.67388	-1.50557	0.644252	-2.33692	0.0194433	0.391668	RP11-2E17.2
ENSG00000176978	295.734	0.690941	0.295752	2.33622	0.01948	0.392023	DPP7
ENSG00000181240	9.21383	1.77542	0.760179	2.33553	0.0195156	0.392373	SLC25A41
ENSG00000100311	451.667	0.848555	0.363392	2.33509	0.0195385	0.392467	PDGFB
ENSG00000129455	27.5353	0.763449	0.327144	2.33368	0.0196123	0.393582	KLK8
ENSG00000230267	6.1091	-2.40653	1.03187	-2.3322	0.0196901	0.394408	HERC2P4
ENSG00000278703	6.05143	1.82877	0.784064	2.33242	0.0196783	0.394408	RP11-706P11.2
ENSG00000122642	474.205	0.352787	0.151333	2.3312	0.0197428	0.395095	FKBP9
ENSG00000163597	12880.4	-0.23893	0.102524	-2.33047	0.0197811	0.395494	SNHG16
ENSG00000108306	801.835	0.520042	0.223358	2.32829	0.0198966	0.396329	FBXL20
ENSG00000118407	1059.91	0.665338	0.28571	2.32872	0.0198741	0.396329	FILIP1
ENSG00000168148	8.59847	-1.27417	0.547174	-2.32863	0.0198784	0.396329	HIST3H3
ENSG00000196083	366.781	0.45527	0.195478	2.32901	0.0198586	0.396329	IL1RAP
ENSG00000124507	428.795	0.364777	0.1567	2.32786	0.0199193	0.396415	PACSIN1
ENSG00000226465	6.34926	2.68682	1.15481	2.32664	0.0199847	0.397348	RP13-401N8.1
ENSG00000147459	1525.98	-0.267531	0.115014	-2.32608	0.0200141	0.397565	DOCK5
ENSG00000118777	155.319	-0.577284	0.248344	-2.32453	0.020097	0.398568	ABCG2
ENSG00000178935	365.522	-0.383331	0.164932	-2.32417	0.0201161	0.398568	ZNF552
ENSG00000242445	68.3534	-0.566724	0.243847	-2.3241	0.0201202	0.398568	RPL7AP11
ENSG00000182379	23.8372	1.29852	0.558805	2.32374	0.0201392	0.398579	NXPH4
ENSG00000276712	64.6582	-0.611306	0.263295	-2.32175	0.0202462	0.400328	MIR7111
ENSG00000185596	268.243	0.553324	0.238625	2.3188	0.0204056	0.402841	WASH3P
ENSG00000271830	11.3855	1.20146	0.518159	2.31871	0.0204107	0.402841	RP11-1C8.7
ENSG00000063244	6379.61	-0.295328	0.127488	-2.31652	0.0205299	0.403514	U2AF2
ENSG00000166454	3821.58	-0.284676	0.122868	-2.31692	0.0205079	0.403514	ATMIN
ENSG00000170629	15.7189	-1.09847	0.474129	-2.31681	0.020514	0.403514	DPY19L2P2
ENSG00000175175	1343.71	0.380105	0.164031	2.31727	0.0204889	0.403514	PPM1E
ENSG00000198648	1552.71	0.515461	0.222531	2.31636	0.0205386	0.403514	STK39
ENSG00000091732	1206.45	-0.2733	0.118042	-2.31527	0.0205984	0.403977	ZC3HC1
ENSG00000124160	789.496	-0.531422	0.229577	-2.31478	0.0206247	0.403977	NCOA5
ENSG00000185043	357.455	0.369415	0.159618	2.31436	0.0206478	0.403977	CIB1
ENSG00000225489	51.6168	1.25208	0.541039	2.31421	0.0206561	0.403977	RP11-390F4.3
ENSG00000261069	16828.5	2.04492	0.883551	2.31443	0.020644	0.403977	RP11-701H24.4
ENSG00000100263	1049.59	-0.329323	0.142331	-2.31379	0.0206792	0.404061	RHBDD3
ENSG00000160460	138.437	0.616725	0.266638	2.31297	0.0207243	0.40452	SPTBN4
ENSG00000165621	15.1082	-0.990568	0.428321	-2.31268	0.0207403	0.40452	OXGR1
ENSG00000101210	491.245	0.557556	0.241219	2.31141	0.0208101	0.404782	EEF1A2
ENSG00000155729	346.721	0.325545	0.140828	2.31165	0.0207971	0.404782	KCTD18
ENSG00000164045	3917.28	-0.350861	0.15177	-2.31179	0.0207893	0.404782	CDC25A
ENSG00000079385	34.9699	0.877315	0.379989	2.30879	0.0209554	0.40582	CEACAM1
ENSG00000138798	310.447	0.386151	0.16731	2.308	0.0209994	0.40582	EGF
ENSG00000155511	105.014	-0.778006	0.337206	-2.30721	0.021043	0.40582	GRIA1
ENSG00000168255	77.7982	-0.808006	0.349871	-2.30944	0.0209191	0.40582	POLR2J3
ENSG00000179820	897.211	0.487036	0.211108	2.30705	0.0210522	0.40582	MYADM
ENSG00000243566	44.478	-1.25061	0.541592	-2.30914	0.0209357	0.40582	UPK3B
ENSG00000258484	10.8111	4.6378	2.00997	2.3074	0.0210325	0.40582	SPESP1
ENSG00000258986	83.4517	0.766693	0.332202	2.30791	0.021004	0.40582	TMEM179
ENSG00000261068	28.8028	1.18252	0.512563	2.30707	0.0210507	0.40582	RP11-7K24.3
ENSG00000262202	144.632	-1.15996	0.502431	-2.3087	0.0209601	0.40582	RP11-160E2.6
ENSG00000137494	204.916	-0.339963	0.147512	-2.30465	0.0211864	0.406587	ANKRD42
ENSG00000171084	70.1384	-0.981426	0.4256	-2.30598	0.0211118	0.406587	FAM86JP
ENSG00000232618	10.0079	1.37435	0.596289	2.30484	0.0211755	0.406587	RP11-439L18.1
ENSG00000248873	29.035	-0.768543	0.333398	-2.30518	0.0211563	0.406587	SERBP1P6
ENSG00000260645	83.7918	0.674703	0.292638	2.30559	0.0211335	0.406587	RP11-250B2.5
ENSG00000231532	14.647	1.14972	0.499017	2.30397	0.0212244	0.406701	LINC01249
ENSG00000270441	92.262	0.911765	0.395754	2.30387	0.0212302	0.406701	RP11-694I15.7
ENSG00000058262	6416.88	-0.227067	0.0985781	-2.30343	0.0212549	0.406813	SEC61A1
ENSG00000040633	1936.44	-0.286133	0.124428	-2.29958	0.0214721	0.409268	PHF23
ENSG00000104763	2802.2	0.324439	0.14104	2.30034	0.0214289	0.409268	ASAH1
ENSG00000154359	3995.62	0.402785	0.175146	2.29971	0.0214649	0.409268	LONRF1
ENSG00000173825	58.9735	0.638109	0.277343	2.3008	0.0214032	0.409268	TIGD3
ENSG00000197291	79.9903	-0.606415	0.26372	-2.29947	0.0214783	0.409268	RAMP2-AS1
ENSG00000217648	23.2574	-0.917326	0.399089	-2.29855	0.0215304	0.409664	RP1-95L4.4
ENSG00000248099	19.4694	1.30417	0.567445	2.29833	0.0215432	0.409664	INSL3
ENSG00000249684	21.0143	-1.02889	0.447715	-2.2981	0.0215562	0.409664	RP11-423H2.3
ENSG00000150594	193.524	1.19143	0.518528	2.29771	0.021578	0.409716	ADRA2A
ENSG00000117151	217.469	0.593721	0.258585	2.29604	0.0216738	0.409993	CTBS
ENSG00000163626	1229.65	0.294183	0.128136	2.29586	0.021684	0.409993	COX18
ENSG00000176884	41.3249	0.7764	0.338232	2.29546	0.0217066	0.409993	GRIN1
ENSG00000183023	262.534	-0.69154	0.30125	-2.29557	0.0217007	0.409993	SLC8A1
ENSG00000183117	117.931	0.784063	0.341572	2.29546	0.021707	0.409993	CSMD1
ENSG00000198467	4317.34	-0.429908	0.187249	-2.29591	0.0216809	0.409993	TPM2
ENSG00000143882	38.1683	0.928031	0.404528	2.29411	0.0217844	0.410733	ATP6V1C2
ENSG00000250241	57.9878	0.827211	0.360554	2.29428	0.0217745	0.410733	RP11-9G1.3
ENSG00000121716	245.54	-0.403928	0.176128	-2.29338	0.0218263	0.411163	PILRB
ENSG00000197712	822.327	0.335637	0.146451	2.2918	0.0219172	0.412154	FAM114A1
ENSG00000224059	9.39557	-1.23769	0.539981	-2.2921	0.0219001	0.412154	HSPA8P16
ENSG00000135740	228.403	0.565272	0.246686	2.29147	0.0219364	0.412156	SLC9A5
ENSG00000140678	8.93639	2.12867	0.929389	2.2904	0.0219982	0.412237	ITGAX
ENSG00000155052	26.7964	0.846996	0.36978	2.29054	0.02199	0.412237	CNTNAP5
ENSG00000157851	486.797	-0.592029	0.25845	-2.29069	0.0219814	0.412237	DPYSL5
ENSG00000273312	12.8064	-1.43404	0.626242	-2.28991	0.0220264	0.412406	RP11-425A6.5
ENSG00000198718	1007.04	0.406046	0.177346	2.28956	0.0220465	0.412424	FAM179B
ENSG00000182568	2115	0.366971	0.160439	2.28729	0.022179	0.413464	SATB1
ENSG00000257497	14.3031	1.10387	0.482558	2.28755	0.0221639	0.413464	RP11-585P4.5
ENSG00000267871	37.0556	0.796138	0.347946	2.28811	0.0221313	0.413464	CTC-444N24.6
ENSG00000270872	85.482	0.983295	0.429796	2.28782	0.0221482	0.413464	SRGAP2D
ENSG00000172785	853.552	-0.503255	0.220092	-2.28657	0.022221	0.413541	CBWD1
ENSG00000278969	6.16797	1.74476	0.763049	2.28656	0.0222216	0.413541	RP11-662I13.3
ENSG00000165916	5520.05	-0.3292	0.14402	-2.2858	0.022266	0.414009	PSMC3
ENSG00000103266	1864.05	-0.322855	0.141341	-2.28423	0.0223581	0.414646	STUB1
ENSG00000129465	6.49007	1.68809	0.738809	2.28488	0.0223196	0.414646	RIPK3
ENSG00000173421	6.28797	2.75344	1.20533	2.28438	0.0223493	0.414646	CCDC36
ENSG00000120800	5446.45	-0.453029	0.198474	-2.28256	0.0224566	0.415755	UTP20
ENSG00000169302	157.22	0.53168	0.232911	2.28276	0.0224447	0.415755	STK32A
ENSG00000280273	14.6276	-1.05068	0.460383	-2.28219	0.0224779	0.415793	AF131216.1
ENSG00000104044	31.9254	-0.733068	0.321278	-2.28172	0.0225057	0.41595	OCA2
ENSG00000105707	542.189	0.627539	0.27511	2.28105	0.0225458	0.415994	HPN
ENSG00000179912	627.748	0.398211	0.174575	2.28103	0.0225468	0.415994	R3HDM2
ENSG00000118960	846.793	0.572805	0.251211	2.28018	0.0225972	0.416209	HS1BP3
ENSG00000184012	274.024	-0.35298	0.154794	-2.28032	0.022589	0.416209	TMPRSS2
ENSG00000075407	940.449	0.802297	0.352198	2.27797	0.0227281	0.417549	ZNF37A
ENSG00000099958	163.544	-0.571999	0.251043	-2.27849	0.0226973	0.417549	DERL3
ENSG00000119138	210.474	0.820267	0.360045	2.27823	0.0227126	0.417549	KLF9
ENSG00000135473	2217.71	0.379401	0.166593	2.27741	0.0227618	0.417812	PAN2
ENSG00000077238	971	-0.333409	0.146487	-2.27604	0.0228438	0.418958	IL4R
ENSG00000178977	45.146	-0.936421	0.41149	-2.27568	0.0228649	0.418989	LINC00324
ENSG00000132661	549.294	-0.406807	0.178852	-2.27454	0.0229334	0.419885	NXT1
ENSG00000170775	360.46	0.537077	0.23622	2.27363	0.0229883	0.420448	GPR37
ENSG00000203635	208.912	0.529839	0.233062	2.27338	0.0230032	0.420448	AC144450.2
ENSG00000174951	929.203	0.350474	0.154205	2.27278	0.0230393	0.420481	FUT1
ENSG00000259448	27.4346	0.93136	0.409802	2.2727	0.0230441	0.420481	RP11-16E12.1
ENSG00000204713	4064.26	-0.248779	0.109504	-2.27187	0.0230946	0.421045	TRIM27
ENSG00000077514	2102.53	-0.382379	0.168595	-2.26803	0.0233273	0.42413	POLD3
ENSG00000108592	3475.84	-0.377153	0.16631	-2.26778	0.0233427	0.42413	FTSJ3
ENSG00000115232	228.561	-0.619612	0.273301	-2.26714	0.0233816	0.42413	ITGA4
ENSG00000120669	28.7003	0.747998	0.330103	2.26596	0.0234541	0.42413	SOHLH2
ENSG00000132109	598.699	-0.303586	0.133991	-2.26571	0.0234689	0.42413	TRIM21
ENSG00000134256	44.4312	-0.697647	0.307916	-2.26571	0.0234694	0.42413	CD101
ENSG00000145113	42.8075	-0.657156	0.289979	-2.26622	0.023438	0.42413	MUC4
ENSG00000158050	130.576	-0.632621	0.279239	-2.26552	0.0234806	0.42413	DUSP2
ENSG00000228288	68.4751	0.62388	0.275146	2.26745	0.0233627	0.42413	PCAT6
ENSG00000250486	129.04	0.59248	0.261151	2.26873	0.023285	0.42413	FAM218A
ENSG00000268649	125.299	-0.715561	0.31568	-2.26673	0.023407	0.42413	MIR296
ENSG00000237766	6.61224	-1.34064	0.591841	-2.2652	0.0235005	0.424133	GGTA2P
ENSG00000115884	2178.18	-0.548306	0.242121	-2.2646	0.0235372	0.424439	SDC1
ENSG00000054793	837.547	-0.454569	0.201098	-2.26044	0.0237942	0.424981	ATP9A
ENSG00000069702	266.383	-0.324705	0.14365	-2.26038	0.0237977	0.424981	TGFBR3
ENSG00000138185	158.167	0.725495	0.320701	2.26222	0.0236841	0.424981	ENTPD1
ENSG00000163491	46.4526	-0.576014	0.254723	-2.26133	0.0237388	0.424981	NEK10
ENSG00000165863	267.848	-0.455653	0.201499	-2.26131	0.0237398	0.424981	C10orf82
ENSG00000174564	102.119	0.518958	0.229285	2.26337	0.0236126	0.424981	IL20RB
ENSG00000180694	3514.71	1.36793	0.605205	2.26027	0.0238043	0.424981	TMEM64
ENSG00000182983	86.0287	-3.18357	1.40735	-2.2621	0.0236911	0.424981	ZNF662
ENSG00000212607	165.974	-0.54156	0.239371	-2.26243	0.0236709	0.424981	SNORA3B
ENSG00000230648	9.08186	1.37963	0.609448	2.26374	0.0235903	0.424981	RP3-406P24.3
ENSG00000235423	72.5932	-0.652871	0.28884	-2.26032	0.0238016	0.424981	RP11-282O18.3
ENSG00000245552	60.2367	0.636962	0.281795	2.26038	0.0237977	0.424981	RP11-712B9.2
ENSG00000134107	111.375	0.742829	0.328988	2.25792	0.0239507	0.425787	BHLHE40
ENSG00000134109	1035.19	0.390328	0.172795	2.25891	0.0238888	0.425787	EDEM1
ENSG00000144681	465.287	-0.560744	0.248394	-2.25747	0.0239786	0.425787	STAC
ENSG00000151468	64.7071	-0.673017	0.298117	-2.25756	0.0239734	0.425787	CCDC3
ENSG00000160113	3790.02	-0.29145	0.129113	-2.25732	0.023988	0.425787	NR2F6
ENSG00000178773	182.516	0.508221	0.225108	2.25768	0.0239657	0.425787	CPNE7
ENSG00000272973	27.704	0.835779	0.370031	2.25867	0.0239038	0.425787	KB-1125A3.11
ENSG00000099822	60.887	0.874984	0.387908	2.25565	0.0240927	0.427293	HCN2
ENSG00000107317	28.6193	0.833506	0.369578	2.25529	0.024115	0.427336	PTGDS
ENSG00000100867	51.0716	-1.31016	0.581023	-2.25492	0.0241381	0.427394	DHRS2
ENSG00000164896	1199.89	-0.332638	0.147692	-2.25224	0.0243071	0.430033	FASTK
ENSG00000105419	735.194	0.713151	0.316894	2.25044	0.0244212	0.431417	MEIS3
ENSG00000251728	8.15311	1.58048	0.702322	2.25037	0.0244255	0.431417	Y
ENSG00000074660	97.5344	-0.756131	0.336114	-2.24963	0.0244725	0.431652	SCARF1
ENSG00000163866	1042.75	-0.27373	0.121687	-2.24945	0.0244838	0.431652	SMIM12
ENSG00000229091	71.6075	-0.640123	0.284599	-2.24921	0.024499	0.431652	HSPA8P8
ENSG00000122783	1121.2	-0.399865	0.177854	-2.24828	0.0245581	0.431835	C7orf49
ENSG00000164128	387.238	0.830883	0.36968	2.24757	0.0246033	0.431835	NPY1R
ENSG00000172578	16.0039	0.988083	0.439641	2.24747	0.0246097	0.431835	KLHL6
ENSG00000214878	8.81472	-1.30518	0.580454	-2.24855	0.024541	0.431835	RPL5P31
ENSG00000250148	6.90276	1.54215	0.686006	2.24801	0.0245758	0.431835	KRT8P31
ENSG00000188229	9312.24	-0.306266	0.136297	-2.24705	0.0246367	0.431955	TUBB4B
ENSG00000164077	344.143	-0.413705	0.184169	-2.24633	0.0246831	0.432416	MON1A
ENSG00000236969	17.0265	-1.38529	0.616931	-2.24546	0.0247387	0.433037	GGT8P
ENSG00000112118	18000.1	-0.300764	0.134106	-2.24274	0.0249137	0.433497	MCM3
ENSG00000125337	24.9034	1.13328	0.505132	2.24353	0.0248624	0.433497	KIF25
ENSG00000146005	27.3565	1.04374	0.465816	2.24068	0.0250471	0.433497	PSD2
ENSG00000178338	472.316	0.451774	0.20144	2.24272	0.024915	0.433497	ZNF354B
ENSG00000180340	855.846	-0.798242	0.356162	-2.24124	0.0250108	0.433497	FZD2
ENSG00000206384	8.83702	-1.19884	0.534401	-2.24333	0.0248755	0.433497	COL6A6
ENSG00000226510	38.5792	0.858921	0.383089	2.24209	0.0249553	0.433497	UPK1A-AS1
ENSG00000228274	81.7395	0.480091	0.21409	2.24247	0.0249311	0.433497	RP3-508I15.9
ENSG00000245857	34.1488	-0.762701	0.339863	-2.24414	0.0248231	0.433497	GS1-24F4.2
ENSG00000248360	9.08358	1.46999	0.655752	2.24168	0.0249818	0.433497	LINC00504
ENSG00000253535	6.48788	1.53658	0.685737	2.24077	0.0250407	0.433497	RP11-624C23.1
ENSG00000254893	25.8145	-0.829361	0.370065	-2.24112	0.0250183	0.433497	AC113404.1
ENSG00000260409	8.37668	2.3416	1.04493	2.24092	0.0250313	0.433497	RP11-403B2.7
ENSG00000279948	40.2511	-0.691478	0.308068	-2.24456	0.0247961	0.433497	CTD-2233K9.1
ENSG00000135245	602.325	-0.438073	0.195636	-2.23922	0.0251414	0.434781	HILPDA
ENSG00000081051	57.5062	-1.239	0.553739	-2.23752	0.0252525	0.434938	AFP
ENSG00000115339	1084.01	0.601545	0.268842	2.23754	0.0252511	0.434938	GALNT3
ENSG00000119711	2146.49	0.397916	0.177793	2.23809	0.0252154	0.434938	ALDH6A1
ENSG00000166171	447.846	-0.363009	0.162175	-2.23838	0.0251963	0.434938	DPCD
ENSG00000267909	116.502	-0.901596	0.402998	-2.23722	0.0252718	0.434938	CCDC177
ENSG00000269886	7.52809	1.46708	0.655682	2.23749	0.0252546	0.434938	RP11-266J6.2
ENSG00000184925	24.8295	0.874101	0.390819	2.23659	0.0253134	0.435305	LCN12
ENSG00000113916	304.328	0.69937	0.31289	2.2352	0.0254043	0.436171	BCL6
ENSG00000134463	999.229	0.383569	0.171593	2.23534	0.0253953	0.436171	ECHDC3
ENSG00000175449	185.496	0.570765	0.255428	2.23454	0.0254473	0.436562	RFESD
ENSG00000100721	38.2662	2.502	1.12013	2.23366	0.0255056	0.437212	TCL1A
ENSG00000175395	150.822	0.719794	0.322515	2.23182	0.0256271	0.438777	ZNF25
ENSG00000258768	33.3078	0.710679	0.318453	2.23166	0.0256376	0.438777	CTD-2292M16.8
ENSG00000089248	3609.34	-0.294516	0.132049	-2.23035	0.0257243	0.439004	ERP29
ENSG00000100058	419.431	-0.519072	0.23284	-2.2293	0.0257938	0.439004	CRYBB2P1
ENSG00000165389	537.62	0.399222	0.179037	2.22983	0.0257584	0.439004	SPTSSA
ENSG00000187266	404.707	0.38858	0.1743	2.22937	0.025789	0.439004	EPOR
ENSG00000259953	35.2138	0.661239	0.296519	2.23	0.0257472	0.439004	RP11-4O1.2
ENSG00000271789	42.1715	0.761982	0.341619	2.2305	0.0257141	0.439004	RP5-1112D6.7
ENSG00000279427	40.3638	1.0479	0.469873	2.23017	0.0257359	0.439004	RP11-132F7.2
ENSG00000049656	3073.64	-0.284926	0.127884	-2.22801	0.0258802	0.439914	CLPTM1L
ENSG00000081019	1425.82	0.373198	0.167607	2.22663	0.0259723	0.439914	RSBN1
ENSG00000107897	846.507	0.414799	0.186284	2.2267	0.0259671	0.439914	ACBD5
ENSG00000126467	18.6286	0.964903	0.433331	2.22671	0.0259668	0.439914	TSKS
ENSG00000157764	2612.81	0.269286	0.120917	2.22703	0.0259455	0.439914	BRAF
ENSG00000162543	104.672	-0.462046	0.207535	-2.22636	0.0259904	0.439914	UBXN10
ENSG00000168795	1378.61	0.301876	0.135521	2.22752	0.0259124	0.439914	ZBTB5
ENSG00000004866	500.536	-0.336486	0.151167	-2.22592	0.0260194	0.440059	ST7
ENSG00000059691	817.221	-0.257011	0.115546	-2.22432	0.0261273	0.440989	GATB
ENSG00000134744	2845.12	0.331327	0.148947	2.22446	0.0261173	0.440989	ZCCHC11
ENSG00000171824	3841.79	-0.218221	0.0981532	-2.22327	0.0261974	0.440989	EXOSC10
ENSG00000174989	1234.22	0.40976	0.184294	2.22341	0.0261883	0.440989	FBXW8
ENSG00000232284	9.51082	1.44024	0.6477	2.22363	0.0261735	0.440989	GNG12-AS1
ENSG00000255328	6.24238	1.60793	0.72302	2.22391	0.0261543	0.440989	RP11-326C3.12
ENSG00000184860	36.7053	3.11875	1.4039	2.22149	0.0263178	0.442669	SDR42E1
ENSG00000256712	60.2137	-0.480175	0.216186	-2.22112	0.0263431	0.44275	RP11-785H5.2
ENSG00000159322	1324.92	-0.329861	0.148547	-2.22059	0.0263788	0.443003	ADPGK
ENSG00000101489	94.2189	0.51613	0.232547	2.21947	0.0264548	0.443732	CELF4
ENSG00000126583	191.517	0.455158	0.205087	2.21934	0.0264634	0.443732	PRKCG
ENSG00000009950	221.16	0.651462	0.293597	2.2189	0.0264937	0.443893	MLXIPL
ENSG00000233558	33.7999	-0.846202	0.381465	-2.21829	0.0265348	0.444236	RP3-486I3.4
ENSG00000204007	7.45067	-4.22288	1.90421	-2.21765	0.0265786	0.444623	GLT6D1
ENSG00000151881	242.333	0.511899	0.230949	2.21651	0.0266569	0.445241	TMEM267
ENSG00000197140	39.6157	0.611534	0.27588	2.21667	0.0266459	0.445241	ADAM32
ENSG00000124557	9.39187	-1.1564	0.521902	-2.21574	0.0267091	0.44542	BTN1A1
ENSG00000128917	18.8181	1.07033	0.483006	2.21598	0.026693	0.44542	DLL4
ENSG00000125826	1246.63	-0.310229	0.140067	-2.21487	0.0267689	0.445728	RBCK1
ENSG00000151490	62.8167	-0.727215	0.328292	-2.21515	0.02675	0.445728	PTPRO
ENSG00000112651	979.607	0.32192	0.145402	2.214	0.0268288	0.446033	MRPL2
ENSG00000131470	534.633	-0.338634	0.152943	-2.21412	0.0268204	0.446033	PSMC3IP
ENSG00000143643	481.007	-0.504638	0.228064	-2.2127	0.026918	0.447172	TTC13
ENSG00000188501	286.35	-0.584361	0.264157	-2.21217	0.0269548	0.447437	LCTL
ENSG00000188647	10440.6	0.770236	0.348245	2.21176	0.0269829	0.447559	PTAR1
ENSG00000131023	1223.94	0.30725	0.138942	2.21135	0.0270114	0.447685	LATS1
ENSG00000272219	11.486	1.20107	0.543267	2.21084	0.0270471	0.447933	CTB-181H17.1
ENSG00000197479	31.2525	1.18307	0.53527	2.21023	0.0270893	0.448285	PCDHB11
ENSG00000163754	1193.08	0.335713	0.151936	2.20957	0.027135	0.448687	GYG1
ENSG00000254343	19.2284	1.09733	0.496693	2.20928	0.0271553	0.448687	RP11-760H22.2
ENSG00000276476	117.646	2.22592	1.0078	2.2087	0.0271957	0.449012	LINC00540
ENSG00000122952	2756.32	-0.338807	0.153486	-2.20741	0.0272855	0.450148	ZWINT
ENSG00000226908	34.7192	-0.907615	0.411269	-2.20686	0.0273237	0.450239	HIST1H2BPS3
ENSG00000235106	492.508	-0.36206	0.164071	-2.20673	0.0273328	0.450239	LINC00094
ENSG00000137193	3068.15	0.460593	0.208834	2.20555	0.0274156	0.450911	PIM1
ENSG00000279878	24.5499	1.03559	0.469489	2.20579	0.0273986	0.450911	RP11-286N22.16
ENSG00000075239	1357.85	0.412817	0.187222	2.20495	0.0274573	0.451252	ACAT1
ENSG00000102554	78.4084	0.651624	0.295891	2.20224	0.0276481	0.451285	KLF5
ENSG00000146592	130.338	0.534544	0.24256	2.20376	0.0275411	0.451285	CREB5
ENSG00000177098	63.7521	-0.605828	0.274975	-2.20321	0.02758	0.451285	SCN4B
ENSG00000203727	6.76059	-1.51222	0.686322	-2.20337	0.027569	0.451285	SAMD5
ENSG00000213963	98.5766	0.55036	0.249802	2.20319	0.0275814	0.451285	AC074286.1
ENSG00000223891	213.462	0.476209	0.216103	2.20362	0.0275513	0.451285	OSER1-AS1
ENSG00000229325	21.517	1.01962	0.462866	2.20283	0.0276067	0.451285	ACAP2-IT1
ENSG00000263013	83.9933	-0.530637	0.240895	-2.20277	0.0276112	0.451285	RP11-876N24.5
ENSG00000274840	62.1194	1.0635	0.482854	2.20254	0.0276275	0.451285	RP11-320G10.1
ENSG00000163873	234.456	-0.775739	0.35256	-2.2003	0.0277853	0.453064	GRIK3
ENSG00000174032	500.025	0.319873	0.145409	2.19981	0.0278203	0.453064	SLC25A30
ENSG00000178607	283.723	0.367561	0.167078	2.19994	0.0278113	0.453064	ERN1
ENSG00000122585	8.02769	-1.32098	0.600658	-2.19922	0.027862	0.453401	NPY
ENSG00000182670	3290.48	0.452207	0.205652	2.1989	0.0278854	0.453438	TTC3
ENSG00000197020	1099.14	0.496543	0.22596	2.19748	0.0279863	0.454222	ZNF100
ENSG00000198178	13.1977	1.08752	0.49488	2.19754	0.027982	0.454222	CLEC4C
ENSG00000266094	87.8067	-0.611365	0.278231	-2.19733	0.0279969	0.454222	RASSF5
ENSG00000261754	42.8007	-0.732396	0.333669	-2.19498	0.0281651	0.456606	CTC-523E23.1
ENSG00000166166	635.643	-0.357305	0.162807	-2.19466	0.0281881	0.456634	TRMT61A
ENSG00000254333	9.37376	1.29062	0.588174	2.19428	0.0282153	0.456732	CTC-367J11.1
ENSG00000253250	791.598	0.630519	0.287428	2.19366	0.0282598	0.457108	C8orf88
ENSG00000257718	10.484	-1.04501	0.47655	-2.19286	0.0283173	0.457694	RP11-396F22.1
ENSG00000088881	35.1892	0.791296	0.36095	2.19226	0.0283607	0.45805	EBF4
ENSG00000081177	1521.91	0.265206	0.121017	2.19147	0.0284175	0.458279	EXD2
ENSG00000244480	6.53057	1.67726	0.76529	2.19166	0.0284039	0.458279	AC005154.7
ENSG00000170577	32.4851	1.23418	0.563435	2.19045	0.0284915	0.458442	SIX2
ENSG00000188290	98.3864	0.9282	0.423721	2.19059	0.0284814	0.458442	HES4
ENSG00000249437	8.25019	1.59558	0.728423	2.19045	0.0284913	0.458442	NAIP
ENSG00000069399	26.6646	0.936022	0.427789	2.18804	0.0286664	0.459103	BCL3
ENSG00000104823	614.634	0.2651	0.121113	2.18887	0.0286064	0.459103	ECH1
ENSG00000105671	1175.6	-0.281127	0.128502	-2.18773	0.0286894	0.459103	DDX49
ENSG00000112531	8136.96	0.317296	0.145027	2.18785	0.0286808	0.459103	QKI
ENSG00000146094	60.3438	-0.609652	0.278693	-2.18754	0.0287033	0.459103	DOK3
ENSG00000161835	200.706	0.621857	0.284251	2.1877	0.0286915	0.459103	GRASP
ENSG00000179528	8.90996	2.25241	1.02917	2.18857	0.0286284	0.459103	LBX2
ENSG00000200840	8.32223	1.50862	0.689283	2.18868	0.0286202	0.459103	RNU6-82P
ENSG00000255471	50.9753	0.676049	0.309123	2.18699	0.0287431	0.459138	RP11-736K20.5
ENSG00000259848	15.5263	2.13313	0.975402	2.18692	0.0287481	0.459138	AC097374.2
ENSG00000272886	1237.57	0.276934	0.126653	2.18656	0.0287747	0.459221	DCP1A
ENSG00000244009	24.2684	1.29595	0.592891	2.18581	0.0288294	0.459753	B3GAT3P1
ENSG00000165443	7.86228	-1.32141	0.604789	-2.18491	0.0288951	0.460112	PHYHIPL
ENSG00000182247	1380.65	0.288688	0.132128	2.18492	0.0288951	0.460112	UBE2E2
ENSG00000267606	24.4894	0.841267	0.385085	2.18463	0.0289161	0.460112	AC006116.21
ENSG00000002016	619.945	0.415032	0.190047	2.18384	0.0289739	0.460692	RAD52
ENSG00000258429	154.357	-0.523947	0.239965	-2.18343	0.0290044	0.460835	PDF
ENSG00000130706	3759.73	-0.291394	0.13349	-2.18288	0.0290447	0.461135	ADRM1
ENSG00000155099	1524.78	0.513776	0.235575	2.18095	0.0291873	0.461696	TMEM55A
ENSG00000197816	102.723	0.486131	0.222835	2.18157	0.029141	0.461696	CCDC180
ENSG00000211772	198.096	-0.598987	0.274607	-2.18125	0.0291648	0.461696	TRBC2
ENSG00000213943	16.3062	-0.891958	0.408947	-2.18111	0.0291751	0.461696	KRT18P17
ENSG00000254027	15.6179	-0.89745	0.411412	-2.18139	0.0291545	0.461696	RP11-363E6.3
ENSG00000149782	4417.68	-0.414807	0.190378	-2.17887	0.0293417	0.463796	PLCB3
ENSG00000248810	12.1707	-1.04011	0.477593	-2.17782	0.0294197	0.464688	RP11-362F19.1
ENSG00000157014	412.619	-0.315354	0.144924	-2.17599	0.0295557	0.466195	TATDN2
ENSG00000235152	231.118	-0.586779	0.269664	-2.17596	0.0295584	0.466195	RP5-865N13.2
ENSG00000268333	125.191	-0.561626	0.258146	-2.17561	0.0295841	0.466258	RP4-806M20.3
ENSG00000151876	58.7776	0.600021	0.275862	2.17507	0.0296247	0.466556	FBXO4
ENSG00000159917	216.871	-0.429569	0.197576	-2.1742	0.0296904	0.467249	ZNF235
ENSG00000177340	7.79514	-1.71744	0.790538	-2.17249	0.0298188	0.468518	FLJ13224
ENSG00000206828	79.7008	-1.14645	0.52777	-2.17226	0.0298364	0.468518	U1
ENSG00000276141	23.5355	0.821993	0.378398	2.1723	0.0298332	0.468518	WHAMMP3
ENSG00000234816	21.8664	1.82287	0.83968	2.17092	0.0299375	0.469474	HIST1H2APS5
ENSG00000262514	14.2004	1.07326	0.494392	2.17087	0.0299409	0.469474	RP11-96D1.9
ENSG00000106123	521.569	-0.397576	0.183207	-2.17009	0.0300001	0.469806	EPHB6
ENSG00000188086	63.9195	0.886811	0.408666	2.17001	0.0300058	0.469806	PRSS45
ENSG00000103089	45.2348	1.25409	0.578077	2.16942	0.0300509	0.469829	FA2H
ENSG00000259326	32.4527	0.688632	0.317388	2.16968	0.0300308	0.469829	RP11-102L12.2
ENSG00000104888	45.7218	1.03592	0.477782	2.16819	0.0301444	0.469898	SLC17A7
ENSG00000106415	891.482	0.320565	0.147991	2.16612	0.0303023	0.469898	GLCCI1
ENSG00000115257	196.484	0.585407	0.270224	2.16638	0.0302825	0.469898	PCSK4
ENSG00000129195	4044.04	-0.217216	0.100182	-2.16822	0.0301418	0.469898	FAM64A
ENSG00000136149	215.686	-0.524003	0.241698	-2.16801	0.0301583	0.469898	RPL13AP25
ENSG00000171311	1275.35	-0.321707	0.148449	-2.16712	0.030226	0.469898	EXOSC1
ENSG00000172733	300.451	0.490145	0.226021	2.16858	0.0301145	0.469898	PURG
ENSG00000173918	48.5722	-0.607719	0.280534	-2.16629	0.0302888	0.469898	C1QTNF1
ENSG00000234985	11.1172	-1.15564	0.533441	-2.16639	0.0302815	0.469898	RP11-3L10.3
ENSG00000239827	18.7952	0.956656	0.441493	2.16687	0.0302449	0.469898	SUGT1P3
ENSG00000261716	464.944	0.530217	0.2446	2.16769	0.0301822	0.469898	RP11-196G18.22
ENSG00000269072	13.7688	1.02041	0.471119	2.16592	0.0303174	0.469898	CTD-3187F8.14
ENSG00000118785	952.148	0.794844	0.367124	2.16505	0.0303835	0.470584	SPP1
ENSG00000059804	28279.5	0.374447	0.173042	2.16391	0.0304713	0.470892	SLC2A3
ENSG00000141034	1095.44	0.335339	0.154987	2.16365	0.030491	0.470892	GID4
ENSG00000174744	1290.97	-0.340706	0.15741	-2.16445	0.0304297	0.470892	BRMS1
ENSG00000213976	428.453	-0.792722	0.366323	-2.16399	0.0304648	0.470892	CTD-2561J22.2
ENSG00000124159	52.7735	0.748173	0.346067	2.16193	0.0306235	0.472331	MATN4
ENSG00000231105	12.8383	1.12767	0.521618	2.16187	0.0306281	0.472331	RP5-1071N3.1
ENSG00000081803	2025.81	0.535171	0.247609	2.16136	0.0306676	0.472362	CADPS2
ENSG00000188596	8.39956	-1.28155	0.592958	-2.16128	0.030674	0.472362	CFAP54
ENSG00000048342	817.965	-0.258774	0.119766	-2.16067	0.0307212	0.472535	CC2D2A
ENSG00000106128	81.4084	-0.593397	0.274699	-2.16017	0.0307593	0.472535	GHRHR
ENSG00000113391	887.792	0.370631	0.171599	2.15986	0.0307835	0.472535	FAM172A
ENSG00000163644	964.412	0.675622	0.312856	2.15953	0.0308092	0.472535	PPM1K
ENSG00000168824	952.508	-0.618873	0.286591	-2.15943	0.030817	0.472535	NSG1
ENSG00000225872	7.63933	1.40014	0.648347	2.15956	0.0308067	0.472535	LINC01529
ENSG00000267079	9.79736	1.63867	0.759011	2.15896	0.0308535	0.472758	RP11-820I16.1
ENSG00000085514	24.1153	-0.789571	0.366043	-2.15705	0.0310022	0.473892	PILRA
ENSG00000087087	3943.1	-0.372834	0.172904	-2.15631	0.0310597	0.473892	SRRT
ENSG00000101346	1678.71	-0.25211	0.116906	-2.15653	0.0310426	0.473892	POFUT1
ENSG00000117597	1082.04	-0.234509	0.108687	-2.15765	0.030955	0.473892	DIEXF
ENSG00000178055	11.29	-1.35422	0.628004	-2.15639	0.0310531	0.473892	PRSS42
ENSG00000186523	192.35	-0.814429	0.377587	-2.15693	0.0310109	0.473892	FAM86B1
ENSG00000139178	580.654	0.487171	0.225967	2.15594	0.0310881	0.473989	C1RL
ENSG00000157429	127.102	-0.395362	0.183435	-2.15532	0.0311366	0.474056	ZNF19
ENSG00000157870	842.293	-0.409847	0.190147	-2.15542	0.031129	0.474056	FAM213B
ENSG00000126500	6.2913	1.86823	0.867255	2.15419	0.0312252	0.474063	FLRT1
ENSG00000177425	12127.6	0.44456	0.206301	2.1549	0.0311694	0.474063	PAWR
ENSG00000249406	7.45516	-1.22421	0.568259	-2.15432	0.0312147	0.474063	RP11-893F2.5
ENSG00000267470	40.7481	0.838246	0.389118	2.15422	0.031223	0.474063	ZNF571-AS1
ENSG00000089057	1076.94	-0.331534	0.154098	-2.15145	0.031441	0.475795	SLC23A2
ENSG00000162817	731.867	0.363066	0.168685	2.15234	0.0313708	0.475795	C1orf115
ENSG00000186314	398.177	0.400241	0.186016	2.15165	0.0314247	0.475795	PRELID2
ENSG00000188610	572.476	0.374674	0.174138	2.15159	0.0314295	0.475795	FAM72B
ENSG00000258458	26.7311	0.877435	0.407856	2.15133	0.0314499	0.475795	CTD-2555K7.2
ENSG00000167632	647.847	0.435266	0.202355	2.151	0.0314763	0.475861	TRAPPC9
ENSG00000120555	22.3053	1.48157	0.688944	2.15049	0.0315165	0.475994	SEPT7P9
ENSG00000135750	508.35	0.467567	0.21744	2.15033	0.0315294	0.475994	KCNK1
ENSG00000267272	87.8932	0.542772	0.252468	2.14987	0.0315658	0.476209	LINC01140
ENSG00000138400	77.9364	-0.517666	0.240927	-2.14864	0.0316632	0.476342	MDH1B
ENSG00000166788	1575.76	-0.358357	0.166766	-2.14886	0.0316452	0.476342	SAAL1
ENSG00000181472	1012.15	-0.324947	0.1512	-2.14913	0.0316242	0.476342	ZBTB2
ENSG00000268496	8.78207	-1.1527	0.536391	-2.14899	0.0316348	0.476342	CTD-2587H19.2
ENSG00000101311	676.118	-0.709524	0.330289	-2.14819	0.0316984	0.47654	FERMT1
ENSG00000257298	77.3114	0.610588	0.284297	2.14771	0.0317367	0.476781	RP3-405J10.3
ENSG00000106610	504.391	0.333516	0.155346	2.14693	0.0317991	0.47685	STAG3L4
ENSG00000159733	124.265	0.534839	0.24926	2.14571	0.0318964	0.47685	ZFYVE28
ENSG00000185404	48.4015	0.942144	0.439011	2.14606	0.0318681	0.47685	SP140L
ENSG00000248966	17.7518	-0.920391	0.428919	-2.14584	0.0318859	0.47685	BCLAF1P1
ENSG00000274127	10.9745	1.21038	0.563924	2.14636	0.0318442	0.47685	uc
ENSG00000275395	70.6939	0.782026	0.364226	2.14709	0.031786	0.47685	FCGBP
ENSG00000277662	16.9809	0.946729	0.441119	2.1462	0.0318572	0.47685	RP11-74J13.9
ENSG00000100296	2529.71	-0.284692	0.132797	-2.14382	0.0320475	0.478598	THOC5
ENSG00000189195	125.658	0.646618	0.301638	2.14369	0.0320578	0.478598	BTBD8
ENSG00000188191	1230.03	-0.317971	0.148379	-2.14296	0.0321161	0.479136	PRKAR1B
ENSG00000156603	444.867	-0.31368	0.146397	-2.14267	0.0321398	0.479157	MED19
ENSG00000135452	649.334	0.303194	0.14154	2.1421	0.0321852	0.479211	TSPAN31
ENSG00000177238	106.346	0.565226	0.263869	2.14207	0.0321879	0.479211	TRIM72
ENSG00000166133	916.87	-0.323006	0.150893	-2.14063	0.0323035	0.479935	RPUSD2
ENSG00000218502	27.07	-0.935577	0.437037	-2.14073	0.0322961	0.479935	H2AFZP3
ENSG00000248708	8.93038	1.98084	0.925215	2.14095	0.0322783	0.479935	CTD-2316B1.2
ENSG00000187553	33.2314	0.959967	0.44861	2.13987	0.0323653	0.480521	CYP26C1
ENSG00000144468	1018.51	0.326132	0.152428	2.13958	0.0323887	0.480537	RHBDD1
ENSG00000143321	13216.3	-0.23345	0.10913	-2.1392	0.0324193	0.480659	HDGF
ENSG00000161526	2388.9	-0.236237	0.110465	-2.13857	0.0324705	0.481087	SAP30BP
ENSG00000120539	2437.6	0.399287	0.186738	2.13823	0.0324985	0.481169	MASTL
ENSG00000105700	3314.42	0.282388	0.132099	2.13769	0.0325415	0.481278	KXD1
ENSG00000168411	6031.29	-0.29623	0.138587	-2.1375	0.0325573	0.481278	RFWD3
ENSG00000258479	10.9678	1.3118	0.613842	2.13703	0.0325953	0.481278	LINC00640
ENSG00000267340	12.7543	1.00292	0.469287	2.13712	0.0325884	0.481278	RP11-242D8.3
ENSG00000133639	1732.78	0.386995	0.181119	2.13669	0.032623	0.481357	BTG1
ENSG00000079156	564.66	-0.37183	0.174115	-2.13555	0.0327163	0.4815	OSBPL6
ENSG00000138092	1852.35	-0.272874	0.127814	-2.13493	0.032767	0.4815	CENPO
ENSG00000198547	19.4987	1.44691	0.67732	2.13623	0.0326607	0.4815	C20orf203
ENSG00000263006	35.2387	0.877155	0.41078	2.13534	0.0327335	0.4815	ROCK1P1
ENSG00000271086	6.37624	1.68986	0.791436	2.13519	0.0327458	0.4815	NAMA
ENSG00000272086	143.82	-0.388727	0.182044	-2.13535	0.0327322	0.4815	CTD-2186M15.3
ENSG00000154040	478.438	0.292036	0.136814	2.13455	0.0327975	0.48162	CABYR
ENSG00000261342	46.6154	-0.544996	0.255356	-2.13426	0.0328213	0.48164	AC006538.1
ENSG00000125746	753.761	0.342073	0.160361	2.13314	0.0329134	0.482169	EML2
ENSG00000169314	142.928	-0.575132	0.269584	-2.1334	0.0328915	0.482169	C22orf15
ENSG00000240005	12.6923	1.18234	0.554306	2.133	0.0329245	0.482169	RP11-293A21.1
ENSG00000008405	1304.47	0.300326	0.1409	2.13148	0.0330493	0.483138	CRY1
ENSG00000123427	130.971	0.41676	0.195586	2.13083	0.033103	0.483138	METTL21B
ENSG00000157388	69.0986	-0.491072	0.23036	-2.13176	0.0330269	0.483138	CACNA1D
ENSG00000164037	28.6676	0.873334	0.409853	2.13085	0.0331017	0.483138	SLC9B1
ENSG00000273284	74.672	0.971447	0.455868	2.13098	0.0330906	0.483138	RP11-888D10.4
ENSG00000269397	154.106	1.08262	0.508153	2.1305	0.0331302	0.483207	CTB-92J24.2
ENSG00000139546	1712.6	-0.27636	0.12983	-2.12862	0.0332856	0.484487	TARBP2
ENSG00000172250	44.0173	1.06093	0.498406	2.12865	0.0332833	0.484487	SERHL
ENSG00000242970	21.0535	-0.888504	0.417403	-2.12865	0.0332831	0.484487	AC068522.4
ENSG00000123739	1632.25	0.280644	0.131976	2.12648	0.0334637	0.486517	PLA2G12A
ENSG00000178193	6.04729	-1.37331	0.645839	-2.1264	0.0334703	0.486517	RP4-682C21.5
ENSG00000076662	374.035	-0.47137	0.221837	-2.12485	0.0335993	0.486608	ICAM3
ENSG00000111679	702.756	0.256568	0.120807	2.12379	0.0336877	0.486608	PTPN6
ENSG00000138942	995.964	-0.264274	0.124415	-2.12412	0.0336597	0.486608	RNF185
ENSG00000163482	1280.85	-0.335104	0.157655	-2.12555	0.0335404	0.486608	STK36
ENSG00000168566	1637.97	0.477069	0.224467	2.12534	0.0335579	0.486608	SNRNP48
ENSG00000177352	843.859	-0.352057	0.165649	-2.12531	0.0335604	0.486608	CCDC71
ENSG00000179262	2478.93	0.345145	0.162418	2.12504	0.0335832	0.486608	RAD23A
ENSG00000243323	26.792	0.856229	0.403041	2.12442	0.033635	0.486608	PTPRVP
ENSG00000267521	13.7767	1.15297	0.542928	2.12361	0.0337027	0.486608	RP11-87G24.6
ENSG00000269001	340.557	0.529132	0.249085	2.12431	0.0336444	0.486608	CTD-2245F17.3
ENSG00000224870	636.668	-0.363395	0.17117	-2.123	0.0337539	0.48702	RP4-758J18.2
ENSG00000094804	3754.33	-0.420118	0.197983	-2.12198	0.033839	0.487245	CDC6
ENSG00000123096	101.136	0.575712	0.271285	2.12217	0.0338237	0.487245	SSPN
ENSG00000134248	880.873	0.43008	0.202677	2.12199	0.0338382	0.487245	LAMTOR5
ENSG00000238207	11.6403	-1.03077	0.485813	-2.12173	0.0338601	0.487245	AC009312.1
ENSG00000163092	22.0633	1.23843	0.583914	2.12092	0.0339288	0.487908	XIRP2
ENSG00000189292	109.425	-0.62787	0.296168	-2.11998	0.0340076	0.488715	FAM150B
ENSG00000064490	1016.92	-0.312835	0.147704	-2.11798	0.0341765	0.489136	RFXANK
ENSG00000084652	4155.73	-0.264996	0.125091	-2.11842	0.0341395	0.489136	TXLNA
ENSG00000105447	2336.08	-0.261495	0.123594	-2.11575	0.0343658	0.489136	GRWD1
ENSG00000105479	94.8308	0.634485	0.299749	2.11672	0.0342834	0.489136	CCDC114
ENSG00000112293	263.307	-0.35748	0.168951	-2.11589	0.0343546	0.489136	GPLD1
ENSG00000119862	1419.82	0.337277	0.159329	2.11685	0.0342726	0.489136	LGALSL
ENSG00000132688	12111.8	-0.30465	0.143981	-2.11591	0.0343526	0.489136	NES
ENSG00000136960	203.96	-0.813059	0.384301	-2.11568	0.0343717	0.489136	ENPP2
ENSG00000139323	1046.29	0.448475	0.211955	2.1159	0.0343532	0.489136	POC1B
ENSG00000176533	199.143	0.498384	0.235591	2.11547	0.0343901	0.489136	GNG7
ENSG00000196151	267.884	0.449063	0.212113	2.11709	0.0342522	0.489136	WDSUB1
ENSG00000196566	6.14077	-1.31163	0.619185	-2.11831	0.0341488	0.489136	RP11-57C13.3
ENSG00000197763	325.987	0.454185	0.214697	2.11547	0.0343903	0.489136	TXNRD3
ENSG00000200785	139.769	-0.674317	0.318302	-2.11848	0.0341344	0.489136	SNORD8
ENSG00000215808	39.6116	-1.26771	0.599292	-2.11534	0.0344007	0.489136	LINC01139
ENSG00000224261	6.62193	-1.34059	0.633233	-2.11705	0.0342557	0.489136	RPSAP18
ENSG00000171954	56.0257	1.18599	0.561142	2.11353	0.034555	0.491005	CYP4F22
ENSG00000143028	59.1674	-0.631265	0.298841	-2.11238	0.0346539	0.492086	SYPL2
ENSG00000111328	2146.25	-0.384176	0.181893	-2.1121	0.0346774	0.492095	CDK2AP1
ENSG00000128656	1227.68	-0.34098	0.161486	-2.11152	0.0347277	0.492483	CHN1
ENSG00000155366	953.765	-0.396751	0.187935	-2.11111	0.0347628	0.492656	RHOC
ENSG00000232346	86.0468	1.2378	0.58666	2.10991	0.0348665	0.4938	SC22CB-1E7.1
ENSG00000213703	11.6632	-1.00958	0.478721	-2.1089	0.0349532	0.494053	RP5-849H19.2
ENSG00000227963	22.5316	-0.737545	0.349698	-2.1091	0.0349364	0.494053	RP5-1074L1.1
ENSG00000278416	15.4608	1.52676	0.723888	2.10912	0.0349346	0.494053	PMS2P2
ENSG00000134809	1114.43	0.405974	0.192648	2.10734	0.0350885	0.495639	TIMM10
ENSG00000104419	243.365	0.655338	0.311074	2.1067	0.0351438	0.49577	NDRG1
ENSG00000167118	1182.23	-0.313742	0.148917	-2.10683	0.0351324	0.49577	URM1
ENSG00000173914	639.213	-0.342031	0.162378	-2.10638	0.0351713	0.495832	RBM4B
ENSG00000111684	1165.06	-0.40197	0.190863	-2.10607	0.0351985	0.49589	LPCAT3
ENSG00000116337	1341.78	-0.348168	0.165388	-2.10516	0.0352778	0.496683	AMPD2
ENSG00000133216	1224.94	-0.284295	0.135106	-2.10423	0.0353581	0.496838	EPHB2
ENSG00000185621	178.959	-0.403882	0.191931	-2.10431	0.0353517	0.496838	LMLN
ENSG00000276757	17.0165	-0.825154	0.392114	-2.10437	0.0353462	0.496838	RN7SL192P
ENSG00000237476	9.95611	1.25653	0.597457	2.10313	0.0354543	0.497864	XXbac-B135H6.15
ENSG00000151743	422.573	0.63383	0.301827	2.09998	0.0357308	0.501092	AMN1
ENSG00000223131	61.0277	-0.846616	0.403118	-2.10017	0.0357141	0.501092	RNA5SP304
ENSG00000111911	517.759	0.479489	0.228505	2.09837	0.0358722	0.501768	HINT3
ENSG00000168710	4672.07	0.232565	0.110819	2.09861	0.0358515	0.501768	AHCYL1
ENSG00000204209	3019.04	-0.268758	0.128052	-2.09882	0.0358324	0.501768	DAXX
ENSG00000237753	76.5398	0.735275	0.350372	2.09855	0.0358565	0.501768	AC079922.3
ENSG00000095321	531.32	0.472392	0.22523	2.09738	0.0359602	0.501835	CRAT
ENSG00000116014	24.1301	-0.82725	0.394368	-2.09766	0.0359351	0.501835	KISS1R
ENSG00000167646	38.0741	-0.622957	0.297007	-2.09745	0.0359538	0.501835	DNAAF3
ENSG00000174136	1060.8	0.309396	0.147524	2.09726	0.0359703	0.501835	RGMB
ENSG00000198113	384.396	-0.572824	0.273169	-2.09696	0.0359974	0.501888	TOR4A
ENSG00000127152	561.623	0.594446	0.283594	2.09612	0.0360715	0.502269	BCL11B
ENSG00000248593	79.3767	0.503918	0.240392	2.09623	0.0360617	0.502269	DSTNP2
ENSG00000243547	130.133	-0.548679	0.261829	-2.09556	0.0361212	0.50231	HNRNPKP4
ENSG00000272180	30.8256	0.987585	0.471255	2.09565	0.0361135	0.50231	RP11-481J13.1
ENSG00000197930	2020.7	0.490748	0.234304	2.09449	0.0362164	0.503309	ERO1A
ENSG00000130204	3855.7	-0.363328	0.173557	-2.09343	0.0363112	0.503856	TOMM40
ENSG00000274210	400.845	-0.812767	0.388227	-2.09353	0.0363015	0.503856	U1
ENSG00000274403	8.03921	1.21526	0.580559	2.09326	0.036326	0.503856	CTD-2036P10.6
ENSG00000123612	89.2735	0.675122	0.322658	2.09238	0.0364049	0.504625	ACVR1C
ENSG00000104312	667.559	0.442737	0.211679	2.09155	0.0364785	0.505319	RIPK2
ENSG00000084453	415.617	0.651409	0.31169	2.08992	0.0366246	0.506649	SLCO1A2
ENSG00000102910	2896.41	0.248433	0.118885	2.0897	0.0366451	0.506649	LONP2
ENSG00000157326	329.262	0.566306	0.27098	2.08985	0.0366317	0.506649	DHRS4
ENSG00000138641	268.65	0.588153	0.281663	2.08814	0.0367848	0.507931	HERC3
ENSG00000271882	11.0709	1.16397	0.557419	2.08814	0.036785	0.507931	KB-1410C5.5
ENSG00000183723	3396.59	0.359716	0.172353	2.08708	0.0368805	0.508923	CMTM4
ENSG00000254349	38.5541	0.786106	0.376812	2.0862	0.0369602	0.509695	MIR2052HG
ENSG00000104818	9.21274	1.3857	0.664462	2.08545	0.0370286	0.510312	CGB2
ENSG00000108622	16.5633	1.34336	0.644442	2.08453	0.0371118	0.511131	ICAM2
ENSG00000073910	1095.19	0.533411	0.25602	2.08348	0.0372077	0.511829	FRY
ENSG00000124299	1990.06	-0.27663	0.132802	-2.08302	0.0372493	0.511829	PEPD
ENSG00000184164	661.691	-0.451776	0.216903	-2.08285	0.0372653	0.511829	CRELD2
ENSG00000198624	527.75	0.330377	0.158603	2.08305	0.0372465	0.511829	CCDC69
ENSG00000224307	9.87201	1.15262	0.553454	2.0826	0.0372878	0.511829	RP11-344B5.2
ENSG00000258670	35.5134	1.47341	0.707639	2.08215	0.0373291	0.511829	RP11-1042B17.3
ENSG00000262454	32.1327	0.831044	0.399107	2.08226	0.037319	0.511829	MIR193BHG
ENSG00000128536	432.797	0.558464	0.268305	2.08145	0.0373928	0.512376	CDHR3
ENSG00000178974	1203.12	0.236752	0.113781	2.08077	0.0374549	0.5129	FBXO34
ENSG00000106483	8.21912	-1.52106	0.731682	-2.07886	0.0376305	0.512904	SFRP4
ENSG00000113739	2723.05	0.449278	0.215994	2.08005	0.0375214	0.512904	STC2
ENSG00000124228	3078.57	-0.270102	0.12986	-2.07994	0.0375306	0.512904	DDX27
ENSG00000130653	17.0774	0.898376	0.432345	2.07791	0.0377174	0.512904	PNPLA7
ENSG00000162931	44.254	-0.784194	0.377284	-2.07852	0.0376613	0.512904	TRIM17
ENSG00000169136	322.232	0.409704	0.197083	2.07884	0.0376323	0.512904	ATF5
ENSG00000224903	5.99042	1.79349	0.862978	2.07826	0.0376855	0.512904	AC005534.8
ENSG00000240053	34.5588	-0.611272	0.294147	-2.07812	0.0376984	0.512904	LY6G5B
ENSG00000249846	144.176	-0.464723	0.223615	-2.07823	0.0376882	0.512904	RP11-77P16.4
ENSG00000251026	11.4738	1.19133	0.572653	2.08037	0.037492	0.512904	RP11-138J23.1
ENSG00000254154	13.2133	0.955123	0.459451	2.07884	0.0376325	0.512904	RP4-798P15.3
ENSG00000113812	1425.41	-0.236714	0.114044	-2.07564	0.0379274	0.513488	ACTR8
ENSG00000135930	3953.13	-0.254379	0.122468	-2.07711	0.0377912	0.513488	EIF4E2
ENSG00000137872	264.519	-0.769491	0.370582	-2.07644	0.0378533	0.513488	SEMA6D
ENSG00000164949	281.765	0.415585	0.200179	2.07606	0.0378881	0.513488	GEM
ENSG00000204177	171.844	-0.352192	0.169679	-2.07564	0.0379273	0.513488	BMS1P1
ENSG00000233061	7.90064	-1.22301	0.589212	-2.07567	0.0379242	0.513488	TTLL7-IT1
ENSG00000281706	150.613	0.413396	0.199128	2.07604	0.0378906	0.513488	LINC01012
ENSG00000135454	26.3513	-0.890651	0.42953	-2.07355	0.0381211	0.514814	B4GALNT1
ENSG00000137936	651.392	0.422856	0.203869	2.07416	0.0380647	0.514814	BCAR3
ENSG00000162997	61.8135	0.568718	0.274214	2.07399	0.0380802	0.514814	PRORSD1P
ENSG00000175970	2632.87	-0.278965	0.13452	-2.07378	0.0380999	0.514814	UNC119B
ENSG00000112419	3837.41	-0.475568	0.229437	-2.07276	0.038195	0.51506	PHACTR2
ENSG00000135926	1144.15	0.493956	0.238329	2.07258	0.0382111	0.51506	TMBIM1
ENSG00000181143	66.2188	-0.643572	0.310481	-2.07282	0.0381891	0.51506	MUC16
ENSG00000160961	596.499	0.45301	0.218604	2.07229	0.0382388	0.51511	ZNF333
ENSG00000127328	1636.17	0.438234	0.211618	2.07087	0.038371	0.515657	RAB3IP
ENSG00000171840	10.9001	-1.23282	0.595371	-2.07067	0.0383895	0.515657	NINJ2
ENSG00000181404	131.276	0.506528	0.244618	2.07069	0.0383879	0.515657	WASH1
ENSG00000230269	104.696	0.666501	0.321929	2.07033	0.0384212	0.515657	RP1-40E16.9
ENSG00000260948	118.266	0.650949	0.314421	2.07031	0.0384232	0.515657	RP11-552M11.8
ENSG00000274605	322.054	-0.378844	0.182984	-2.07036	0.0384185	0.515657	RP11-12G12.7
ENSG00000183914	47.2354	0.620265	0.29964	2.07003	0.0384492	0.515684	DNAH2
ENSG00000109066	652.873	-0.293383	0.14177	-2.06943	0.0385056	0.51612	TMEM104
ENSG00000102524	13.9718	1.27181	0.615539	2.06618	0.0388117	0.519139	TNFSF13B
ENSG00000138311	34.7289	-0.829948	0.401765	-2.06576	0.0388515	0.519139	ZNF365
ENSG00000177989	6.46386	1.43665	0.695389	2.06597	0.0388317	0.519139	ODF3B
ENSG00000250366	2121.99	0.305337	0.147768	2.06632	0.0387979	0.519139	TUNAR
ENSG00000272669	21.2628	-0.772264	0.373794	-2.06601	0.0388272	0.519139	RP3-508I15.21
ENSG00000072041	1703.26	0.497337	0.240824	2.06514	0.0389096	0.519168	SLC6A15
ENSG00000129990	26.4245	0.966381	0.467974	2.06503	0.0389201	0.519168	SYT5
ENSG00000154016	11.9878	-1.10158	0.53346	-2.06497	0.0389262	0.519168	GRAP
ENSG00000188785	556.482	0.334894	0.162273	2.06377	0.0390394	0.520356	ZNF548
ENSG00000232653	7.93967	1.31354	0.637355	2.06092	0.0393109	0.52365	GOLGA8N
ENSG00000092345	118.425	0.751387	0.364651	2.06057	0.0393446	0.523774	DAZL
ENSG00000261485	62.666	-0.505788	0.245595	-2.05944	0.039452	0.524881	PAN3-AS1
ENSG00000172009	2963.44	-0.298969	0.145215	-2.05881	0.0395127	0.525363	THOP1
ENSG00000137101	133.722	0.422269	0.20516	2.05824	0.0395673	0.525477	CD72
ENSG00000241478	29.3202	-0.894069	0.434392	-2.05821	0.0395702	0.525477	HSPA8P9
ENSG00000146085	700.579	0.306349	0.148893	2.05752	0.0396362	0.52603	MUT
ENSG00000159753	584.982	0.450766	0.21917	2.0567	0.0397156	0.526758	CARMIL2
ENSG00000082512	1237.44	0.305208	0.148464	2.05577	0.0398051	0.52724	TRAF5
ENSG00000118217	2407.45	0.372994	0.181495	2.05512	0.0398677	0.52724	ATF6
ENSG00000169490	1229.2	-0.374363	0.182112	-2.05568	0.0398138	0.52724	TM2D2
ENSG00000235652	51.8371	0.655726	0.319041	2.05531	0.0398494	0.52724	RP11-545I5.3
ENSG00000272686	294.52	0.604425	0.294117	2.05505	0.0398744	0.52724	RP11-390E23.6
ENSG00000185085	929.14	-0.421868	0.205331	-2.05458	0.0399197	0.527514	INTS5
ENSG00000172901	10.2175	1.2105	0.589318	2.05407	0.0399691	0.527843	LVRN
ENSG00000081320	1130.64	0.561759	0.273657	2.05279	0.0400934	0.528835	STK17B
ENSG00000139620	1440.96	-0.305669	0.14889	-2.05299	0.0400737	0.528835	KANSL2
ENSG00000107679	2020.44	0.369053	0.180125	2.04887	0.0404746	0.529233	PLEKHA1
ENSG00000111799	443.677	-0.713031	0.347994	-2.04897	0.0404647	0.529233	COL12A1
ENSG00000115163	974.827	0.310641	0.151647	2.04846	0.0405153	0.529233	CENPA
ENSG00000125744	543.505	-0.339614	0.165805	-2.04828	0.0405326	0.529233	RTN2
ENSG00000129749	20.7306	-0.910951	0.444343	-2.05011	0.040354	0.529233	CHRNA10
ENSG00000139626	10.9112	-1.02011	0.497712	-2.0496	0.0404034	0.529233	ITGB7
ENSG00000140854	1925.55	-0.359093	0.175083	-2.05099	0.0402684	0.529233	KATNB1
ENSG00000177646	1246.81	-0.243964	0.118973	-2.05059	0.0403065	0.529233	ACAD9
ENSG00000183742	3484.75	0.470404	0.229697	2.04793	0.0405664	0.529233	MACC1
ENSG00000184584	7.49733	-1.64566	0.802492	-2.05069	0.0402973	0.529233	TMEM173
ENSG00000198231	4532.88	-0.285048	0.139049	-2.04998	0.0403661	0.529233	DDX42
ENSG00000204054	114.168	0.500747	0.244335	2.04943	0.0404205	0.529233	LINC00963
ENSG00000224789	32.6721	1.08258	0.528355	2.04896	0.0404658	0.529233	AC012363.4
ENSG00000259570	10.9442	-1.03774	0.506559	-2.04861	0.0405004	0.529233	RP11-671M22.4
ENSG00000259932	155.375	-0.904332	0.441574	-2.04798	0.0405623	0.529233	CTD-2651B20.7
ENSG00000272711	187.64	-0.368515	0.179792	-2.04967	0.0403966	0.529233	RP11-259N19.1
ENSG00000276846	24.2111	0.769459	0.375556	2.04885	0.0404766	0.529233	CTD-3220F14.3
ENSG00000279619	93.1853	0.765275	0.373509	2.04888	0.0404739	0.529233	CTD-2527I21.5
ENSG00000113532	46.4748	0.684503	0.334438	2.04673	0.0406849	0.529642	ST8SIA4
ENSG00000136010	833.154	0.548202	0.267811	2.04698	0.0406604	0.529642	ALDH1L2
ENSG00000205927	39.5967	1.03429	0.505183	2.04736	0.0406227	0.529642	OLIG2
ENSG00000267317	53.068	0.642902	0.31413	2.04661	0.0406963	0.529642	CTB-25B13.12
ENSG00000168806	569.88	-0.47224	0.230828	-2.04586	0.0407703	0.529677	LCMT2
ENSG00000168811	18.1325	-0.754723	0.36892	-2.04576	0.0407795	0.529677	IL12A
ENSG00000226377	6.13465	-1.25441	0.613043	-2.04621	0.0407359	0.529677	AC084809.2
ENSG00000268119	1260.86	0.299836	0.146577	2.04558	0.0407974	0.529677	CTD-2561J22.5
ENSG00000267119	6.78353	-1.67126	0.817121	-2.0453	0.0408253	0.52972	RPL10P15
ENSG00000061987	2324.57	0.277334	0.135857	2.04137	0.0412141	0.530306	MON2
ENSG00000100784	316.111	0.455216	0.223162	2.03985	0.0413652	0.530306	RPS6KA5
ENSG00000125482	1057.87	-0.315604	0.154704	-2.04004	0.0413459	0.530306	TTF1
ENSG00000132780	22890.3	-0.337559	0.16526	-2.0426	0.0410924	0.530306	NASP
ENSG00000149792	1650.34	-0.210917	0.103332	-2.04116	0.0412353	0.530306	MRPL49
ENSG00000157426	1224.95	0.44296	0.216753	2.04361	0.0409917	0.530306	AASDH
ENSG00000166598	29759.1	-0.49843	0.244369	-2.03966	0.0413842	0.530306	HSP90B1
ENSG00000167840	1024.05	-0.350051	0.171589	-2.04006	0.0413447	0.530306	ZNF232
ENSG00000173156	353.506	0.341884	0.167288	2.04369	0.0409844	0.530306	RHOD
ENSG00000174738	2419.63	0.440559	0.215563	2.04375	0.0409778	0.530306	NR1D2
ENSG00000177103	14.3873	1.03834	0.509044	2.03979	0.0413715	0.530306	DSCAML1
ENSG00000184178	708.679	-0.246966	0.120905	-2.04264	0.0410883	0.530306	SCFD2
ENSG00000205111	9.29899	1.13157	0.5545	2.0407	0.0412809	0.530306	CDKL4
ENSG00000221817	24.7236	-0.887068	0.434416	-2.04198	0.0411537	0.530306	PPP3CB-AS1
ENSG00000240086	48.602	1.15153	0.56411	2.04133	0.0412184	0.530306	RP11-657O9.1
ENSG00000251085	7.36715	-1.12007	0.548841	-2.0408	0.0412709	0.530306	RP11-893F2.6
ENSG00000251669	238.842	-0.481465	0.23582	-2.04166	0.0411848	0.530306	FAM86EP
ENSG00000254485	13.2953	1.04734	0.513497	2.03962	0.0413882	0.530306	RP11-380O24.1
ENSG00000256356	42.1302	-0.751781	0.368429	-2.04051	0.0413	0.530306	HSPA8P5
ENSG00000267568	32.5547	0.81939	0.400863	2.04406	0.0409473	0.530306	RP11-87G24.3
ENSG00000267723	27.9928	0.807608	0.395315	2.04295	0.0410576	0.530306	CTD-2189E23.1
ENSG00000170919	405.107	0.551568	0.270608	2.03826	0.0415244	0.531734	TPT1-AS1
ENSG00000225554	9.14598	1.44454	0.708904	2.0377	0.0415796	0.532125	RP11-527D7.1
ENSG00000090661	3048.63	0.450001	0.220967	2.03651	0.0416989	0.533269	CERS4
ENSG00000165091	16.8696	-1.36873	0.672158	-2.03632	0.0417186	0.533269	TMC1
ENSG00000131791	2236.11	0.304449	0.149587	2.03526	0.0418248	0.533675	PRKAB2
ENSG00000214999	70.329	0.53384	0.262276	2.03541	0.0418097	0.533675	AC129492.6
ENSG00000226074	8.77484	-1.04115	0.51151	-2.03543	0.0418071	0.533675	PRSS44
ENSG00000134627	23.8909	0.7453	0.366358	2.03435	0.0419166	0.534213	PIWIL4
ENSG00000237517	109.463	-0.505502	0.248475	-2.03442	0.0419095	0.534213	DGCR5
ENSG00000224383	24.1448	-0.822641	0.404454	-2.03396	0.0419559	0.534397	PRR29
ENSG00000065361	2683.21	-0.491173	0.241811	-2.03122	0.0422322	0.534762	ERBB3
ENSG00000081087	1051	0.532035	0.261973	2.03087	0.0422677	0.534762	OSTM1
ENSG00000099864	347.579	0.560583	0.275833	2.03232	0.0421208	0.534762	PALM
ENSG00000102878	6.40657	1.84234	0.906774	2.03175	0.0421793	0.534762	HSF4
ENSG00000151651	161.308	0.471175	0.231882	2.03196	0.0421577	0.534762	ADAM8
ENSG00000158089	384.435	-0.386915	0.190376	-2.03237	0.0421159	0.534762	GALNT14
ENSG00000161204	1318.64	-0.295872	0.145697	-2.03073	0.0422828	0.534762	ABCF3
ENSG00000172403	229.564	-0.761176	0.374729	-2.03127	0.0422278	0.534762	SYNPO2
ENSG00000197375	332.426	0.432758	0.213098	2.03079	0.0422766	0.534762	SLC22A5
ENSG00000226086	10.9225	-1.06565	0.524553	-2.03154	0.0422007	0.534762	EIF3LP3
ENSG00000238228	12.5514	1.27556	0.627949	2.03131	0.0422238	0.534762	OR7E7P
ENSG00000267745	50.6922	0.697742	0.343465	2.03148	0.0422062	0.534762	RP11-686D22.8
ENSG00000112175	11.998	1.66068	0.818438	2.02908	0.04245	0.536561	BMP5
ENSG00000125618	14.0554	-1.92897	0.950832	-2.02872	0.0424873	0.536621	PAX8
ENSG00000139209	893.348	0.636035	0.31358	2.0283	0.0425296	0.536621	SLC38A4
ENSG00000259456	16.924	-0.884968	0.436279	-2.02844	0.0425149	0.536621	ADNP-AS1
ENSG00000075785	1908.97	0.353422	0.174364	2.02692	0.0426705	0.537518	RAB7A
ENSG00000086289	293.157	-0.420633	0.207603	-2.02614	0.0427506	0.537518	EPDR1
ENSG00000157557	2186.54	0.576699	0.284618	2.02622	0.042742	0.537518	ETS2
ENSG00000160087	1304.57	-0.25911	0.127876	-2.02626	0.0427382	0.537518	UBE2J2
ENSG00000242242	46.0316	-0.759637	0.374756	-2.02702	0.0426609	0.537518	PVRL3-AS1
ENSG00000270362	81.6179	0.443984	0.219065	2.02672	0.042691	0.537518	HMGN3-AS1
ENSG00000179532	609.803	0.596857	0.294625	2.02582	0.0427833	0.537615	DNHD1
ENSG00000100982	774.563	0.455145	0.224869	2.02404	0.0429656	0.538647	PCIF1
ENSG00000230521	19.9647	0.99064	0.489321	2.02452	0.0429169	0.538647	HCG4P7
ENSG00000253683	54.4124	-0.61803	0.305343	-2.02405	0.0429647	0.538647	CTB-79E8.3
ENSG00000273314	103.1	-0.412111	0.203563	-2.02449	0.0429201	0.538647	RP5-1136G13.2
ENSG00000224738	25.829	0.626641	0.30979	2.0228	0.0430942	0.539945	AC099850.1
ENSG00000183617	733.608	-0.306706	0.151644	-2.02255	0.0431198	0.539952	MRPL54
ENSG00000267858	40.1781	-0.839109	0.414975	-2.02207	0.0431689	0.540252	MZF1-AS1
ENSG00000034677	890.05	0.445026	0.220301	2.02008	0.0433754	0.540383	RNF19A
ENSG00000088836	351.577	-0.328802	0.162791	-2.01979	0.0434054	0.540383	SLC4A11
ENSG00000110422	2405.87	0.335292	0.165867	2.02145	0.0432329	0.540383	HIPK3
ENSG00000132635	672.75	0.51295	0.253935	2.02	0.0433829	0.540383	PCED1A
ENSG00000132749	1025.88	0.385297	0.190783	2.01956	0.0434292	0.540383	TESMIN
ENSG00000196712	4872.51	0.259356	0.12839	2.02007	0.0433761	0.540383	NF1
ENSG00000198393	579.261	-0.352566	0.174577	-2.01955	0.0434306	0.540383	ZNF26
ENSG00000233820	34.6584	0.684446	0.338557	2.02165	0.0432121	0.540383	RP11-535M15.2
ENSG00000234648	40.739	-0.698898	0.345925	-2.02038	0.0433445	0.540383	AL162151.3
ENSG00000251654	9.37085	-1.93901	0.960058	-2.01968	0.0434168	0.540383	RP11-192H6.2
ENSG00000132376	589.175	-0.292871	0.145095	-2.01848	0.043541	0.541444	INPP5K
ENSG00000178662	1062.48	0.489359	0.242468	2.01824	0.0435664	0.541447	CSRNP3
ENSG00000167994	234.269	0.595491	0.295137	2.01768	0.0436249	0.541861	RAB3IL1
ENSG00000170190	569.016	0.365388	0.18118	2.01672	0.0437251	0.542479	SLC16A5
ENSG00000214595	66.5432	-0.57216	0.283708	-2.01672	0.0437246	0.542479	EML6
ENSG00000100211	363.654	-0.266322	0.132093	-2.01617	0.0437819	0.54287	CBY1
ENSG00000136828	1219.83	0.348456	0.172893	2.01544	0.0438581	0.543301	RALGPS1
ENSG00000153531	30.3163	-0.678189	0.33652	-2.0153	0.0438731	0.543301	ADPRHL1
ENSG00000185149	21.1313	-0.783204	0.388695	-2.01495	0.0439094	0.543301	NPY2R
ENSG00000255983	23.7953	0.950206	0.471595	2.01488	0.0439177	0.543301	RP11-1038A11.1
ENSG00000115525	195.73	0.356475	0.17701	2.01387	0.0440232	0.543356	ST3GAL5
ENSG00000121775	375.229	-0.376175	0.186754	-2.01427	0.0439808	0.543356	TMEM39B
ENSG00000236809	46.1131	-1.01967	0.50616	-2.01452	0.0439553	0.543356	SNX25P1
ENSG00000242104	12.7494	1.07926	0.535884	2.01398	0.0440113	0.543356	RP11-340E6.1
ENSG00000165406	1162.34	0.271931	0.135096	2.01287	0.0441282	0.544341	MARCH8
ENSG00000188573	184.008	-0.619414	0.307881	-2.01186	0.0442343	0.544713	FBLL1
ENSG00000226332	8.9336	-1.0553	0.524487	-2.01207	0.0442129	0.544713	RP11-157P1.4
ENSG00000262265	12.0811	0.977625	0.485896	2.012	0.0442195	0.544713	RP5-867C24.4
ENSG00000227827	106.065	2.59698	1.29103	2.01156	0.0442659	0.544789	RP11-958N24.2
ENSG00000163931	41978.7	0.252422	0.125511	2.01115	0.0443097	0.544932	TKT
ENSG00000251129	6.46444	2.34963	1.1684	2.01097	0.0443282	0.544932	RP11-734I18.1
ENSG00000141497	12.4106	1.15442	0.574215	2.01042	0.0443862	0.545335	ZMYND15
ENSG00000162434	3010.89	0.319406	0.158894	2.01018	0.0444118	0.545337	JAK1
ENSG00000075420	3001.14	0.235151	0.117207	2.00628	0.0448263	0.545351	FNDC3B
ENSG00000104368	219.289	-0.8404	0.419217	-2.00469	0.0449963	0.545351	PLAT
ENSG00000112599	40.276	0.820071	0.408755	2.00627	0.0448279	0.545351	GUCA1B
ENSG00000118508	259.946	0.472492	0.235747	2.00423	0.0450452	0.545351	RAB32
ENSG00000119314	9238.27	0.393116	0.196	2.00569	0.0448891	0.545351	PTBP3
ENSG00000126821	557.221	0.457	0.227878	2.00546	0.0449137	0.545351	SGPP1
ENSG00000127249	8.50924	1.19237	0.594933	2.00422	0.0450467	0.545351	ATP13A4
ENSG00000138823	24.2403	-0.921001	0.459436	-2.00464	0.0450021	0.545351	MTTP
ENSG00000140955	31.7113	-0.679351	0.338668	-2.00595	0.0448613	0.545351	ADAD2
ENSG00000148690	752.821	0.450886	0.224855	2.00524	0.0449379	0.545351	FRA10AC1
ENSG00000153898	195.018	0.330503	0.164554	2.00847	0.0445932	0.545351	MCOLN2
ENSG00000154079	782.861	0.283043	0.141075	2.00633	0.0448211	0.545351	SDHAF4
ENSG00000166855	3011.87	0.298118	0.148666	2.00528	0.0449327	0.545351	CLPX
ENSG00000169627	26.6121	-0.673298	0.335786	-2.00514	0.0449477	0.545351	BOLA2B
ENSG00000170088	845.749	0.330032	0.164602	2.00503	0.04496	0.545351	TMEM192
ENSG00000177192	903.686	-0.38462	0.191809	-2.00522	0.0449396	0.545351	PUS1
ENSG00000198176	2595.85	-0.325257	0.162223	-2.005	0.0449634	0.545351	TFDP1
ENSG00000224914	144.134	-0.434549	0.216388	-2.00819	0.0446229	0.545351	LINC00863
ENSG00000227946	382.22	0.479134	0.239052	2.00431	0.0450371	0.545351	AC007383.3
ENSG00000228420	6.40811	1.58135	0.788519	2.00547	0.0449124	0.545351	RP4-735C1.6
ENSG00000234899	37.9507	0.75586	0.376986	2.00501	0.0449621	0.545351	SOX9-AS1
ENSG00000237943	526.053	0.447324	0.222729	2.00838	0.0446028	0.545351	PRKCQ-AS1
ENSG00000244041	90.988	0.470374	0.234169	2.0087	0.0445693	0.545351	LINC01011
ENSG00000261765	9.67298	1.16367	0.579516	2.008	0.0446431	0.545351	RP11-498D10.3
ENSG00000268964	11.2697	1.30485	0.649884	2.00782	0.0446624	0.545351	ERVV-2
ENSG00000123444	625.718	-0.267332	0.133409	-2.00385	0.0450863	0.545525	KBTBD4
ENSG00000074071	3611.69	-0.231657	0.115676	-2.00264	0.0452159	0.546122	MRPS34
ENSG00000112561	57.2507	-0.463223	0.231305	-2.00265	0.0452147	0.546122	TFEB
ENSG00000232536	19.0446	1.16441	0.581419	2.0027	0.04521	0.546122	RP11-74C1.4
ENSG00000253307	14.4579	-0.969805	0.484311	-2.00244	0.0452372	0.546122	RP11-10J21.4
ENSG00000162378	2505.28	0.358686	0.179153	2.00212	0.0452716	0.54623	ZYG11B
ENSG00000140988	47878.9	0.349572	0.174651	2.00154	0.0453338	0.546674	RPS2
ENSG00000051180	821.165	-0.355497	0.177672	-2.00086	0.0454072	0.547217	RAD51
ENSG00000174243	5694.18	-0.264107	0.13201	-2.00065	0.0454297	0.547217	DDX23
ENSG00000002834	8994.21	-0.284189	0.142088	-2.00009	0.0454905	0.547271	LASP1
ENSG00000125753	6134.03	-0.282488	0.141289	-1.99936	0.0455691	0.547271	VASP
ENSG00000158467	1802.88	0.363355	0.181747	1.99923	0.0455833	0.547271	AHCYL2
ENSG00000163749	13.0566	1.29007	0.645293	1.9992	0.0455868	0.547271	CCDC158
ENSG00000175711	375.226	0.307814	0.153888	2.00024	0.0454742	0.547271	B3GNTL1
ENSG00000280355	51.0014	0.722111	0.361093	1.99979	0.0455225	0.547271	RP11-119F19.5
ENSG00000127831	334.336	-0.543675	0.272022	-1.99864	0.0456471	0.547689	VIL1
ENSG00000091972	1745.39	0.39587	0.198148	1.99785	0.045733	0.547881	CD200
ENSG00000129347	1359.7	-0.356715	0.178597	-1.99732	0.0457904	0.547881	KRI1
ENSG00000197721	84.5598	0.924863	0.46305	1.99733	0.0457896	0.547881	CR1L
ENSG00000204859	640.822	-0.284468	0.142414	-1.99747	0.0457737	0.547881	ZBTB48
ENSG00000223573	18.4611	0.877396	0.439223	1.99761	0.0457588	0.547881	TINCR
ENSG00000006740	1211.83	0.3607	0.180663	1.99653	0.0458765	0.548089	ARHGAP44
ENSG00000180998	261.75	0.517364	0.259118	1.99664	0.0458645	0.548089	GPR137C
ENSG00000228753	11.7316	-1.04277	0.52231	-1.99646	0.0458843	0.548089	EIF4BP2
ENSG00000137078	90.2705	-0.427626	0.214263	-1.9958	0.0459558	0.548638	SIT1
ENSG00000214578	14.4307	-0.893377	0.44776	-1.99521	0.0460194	0.549094	HMGN2P15
ENSG00000272911	9.66982	-0.958315	0.480619	-1.99392	0.0461608	0.550475	RP11-74E22.6
ENSG00000179476	226.169	0.459964	0.230819	1.99274	0.0462896	0.551705	C14orf28
ENSG00000078328	39.0403	0.602797	0.302738	1.99115	0.0464646	0.552111	RBFOX1
ENSG00000107537	801.067	0.32464	0.163084	1.99063	0.046522	0.552111	PHYH
ENSG00000124466	64.3729	0.524773	0.263465	1.99182	0.0463913	0.552111	LYPD3
ENSG00000129473	498.521	0.348264	0.174861	1.99167	0.0464077	0.552111	BCL2L2
ENSG00000134258	9.40086	-0.992015	0.498359	-1.99056	0.046529	0.552111	VTCN1
ENSG00000189350	86.0945	-0.618866	0.310876	-1.99071	0.0465124	0.552111	FAM179A
ENSG00000204257	120.25	0.594753	0.298734	1.99091	0.0464904	0.552111	HLA-DMA
ENSG00000230778	17.8521	0.920004	0.461857	1.99197	0.0463746	0.552111	ANKRD63
ENSG00000104853	1842.34	-0.318626	0.160114	-1.99	0.0465911	0.552239	CLPTM1
ENSG00000114166	55.1838	-0.813824	0.408947	-1.99005	0.0465859	0.552239	KAT2B
ENSG00000050628	26.3035	-1.06392	0.534918	-1.98895	0.0467072	0.55331	PTGER3
ENSG00000260528	31.7531	0.698219	0.351164	1.9883	0.0467784	0.553849	FAM157C
ENSG00000088876	304.639	0.33435	0.168239	1.98734	0.0468843	0.553884	ZNF343
ENSG00000124357	586.477	-0.276515	0.139098	-1.98791	0.0468211	0.553884	NAGK
ENSG00000169217	2875.76	-0.220898	0.111146	-1.98745	0.0468727	0.553884	CD2BP2
ENSG00000261502	8.0751	1.34807	0.678274	1.9875	0.0468673	0.553884	RP11-96H17.1
ENSG00000107281	403.163	0.454061	0.22854	1.98679	0.0469452	0.55418	NPDC1
ENSG00000144331	73.6396	0.535205	0.269401	1.98665	0.0469609	0.55418	ZNF385B
ENSG00000230789	10.4708	1.09091	0.549287	1.98606	0.0470272	0.554658	ARHGAP26-IT1
ENSG00000011485	3427.33	-0.190026	0.0957125	-1.98539	0.0471015	0.554765	PPP5C
ENSG00000171574	146.822	-0.634669	0.319688	-1.98528	0.0471136	0.554765	ZNF584
ENSG00000262096	17.1627	1.46016	0.735375	1.9856	0.0470779	0.554765	PCDHB19P
ENSG00000231806	125.77	0.66643	0.335825	1.98445	0.0472054	0.555277	PCAT7
ENSG00000234286	7.79042	-1.18555	0.597427	-1.98442	0.0472088	0.555277	AC006026.13
ENSG00000244280	94.3494	1.00278	0.505389	1.98417	0.0472372	0.555308	ECEL1P2
ENSG00000139318	14546.5	0.398855	0.201083	1.98354	0.0473075	0.555831	DUSP6
ENSG00000165655	11.1437	1.19676	0.603419	1.98329	0.047335	0.55585	ZNF503
ENSG00000033050	2876.36	-0.23703	0.119557	-1.98257	0.0474153	0.555909	ABCF2
ENSG00000104679	674.776	-0.356262	0.179699	-1.98255	0.0474175	0.555909	R3HCC1
ENSG00000145740	1702.94	0.31948	0.161115	1.98293	0.0473754	0.555909	SLC30A5
ENSG00000133962	29.7518	0.646151	0.326016	1.98196	0.047484	0.556385	CATSPERB
ENSG00000090013	931.177	0.420801	0.212368	1.98147	0.0475383	0.556415	BLVRB
ENSG00000137806	560.302	0.316763	0.159854	1.98157	0.0475272	0.556415	NDUFAF1
ENSG00000112981	11.1403	-0.979871	0.494863	-1.98008	0.0476941	0.556588	NME5
ENSG00000169689	1159.07	-0.295872	0.149387	-1.98058	0.0476387	0.556588	CENPX
ENSG00000170445	2304.12	-0.235475	0.118929	-1.97996	0.0477076	0.556588	HARS
ENSG00000170448	2071.01	0.276492	0.139637	1.98008	0.0476941	0.556588	NFXL1
ENSG00000177791	166.846	0.40297	0.203525	1.97996	0.0477083	0.556588	MYOZ1
ENSG00000214796	600.371	-0.346874	0.175127	-1.9807	0.0476246	0.556588	RP11-480I12.5
ENSG00000118004	36.8822	0.762096	0.384981	1.97957	0.0477521	0.556798	COLEC11
ENSG00000247675	27.1219	0.714149	0.360853	1.97906	0.0478096	0.557165	LRP4-AS1
ENSG00000163596	278.79	0.877473	0.443455	1.97872	0.0478477	0.557308	ICA1L
ENSG00000183431	6976.01	-0.288675	0.145919	-1.97832	0.0478921	0.557523	SF3A3
ENSG00000171798	1206.84	0.440812	0.222852	1.97805	0.0479229	0.55758	KNDC1
ENSG00000118946	80.8491	0.498863	0.252259	1.97758	0.047976	0.557896	PCDH17
ENSG00000188026	305.417	0.617734	0.312539	1.9765	0.0480977	0.55901	RILPL1
ENSG00000092853	2239.71	-0.385849	0.195433	-1.97433	0.0483438	0.561227	CLSPN
ENSG00000170653	389.878	0.386465	0.195764	1.97413	0.0483668	0.561227	ATF7
ENSG00000265263	17.8295	1.01265	0.512949	1.97417	0.0483619	0.561227	RP11-135L13.4
ENSG00000115207	4231.89	-0.232567	0.117843	-1.97353	0.0484347	0.561712	GTF3C2
ENSG00000207142	422.576	-0.718963	0.364375	-1.97314	0.0484793	0.561926	Y
ENSG00000116132	22.8291	-2.23967	1.1368	-1.97016	0.0488204	0.563732	PRRX1
ENSG00000117758	685.141	0.371419	0.188514	1.97025	0.0488102	0.563732	STX12
ENSG00000126070	2148.31	0.347873	0.176694	1.96879	0.0489773	0.563732	AGO3
ENSG00000128694	861.96	0.281387	0.142858	1.96969	0.0488737	0.563732	OSGEPL1
ENSG00000145428	311.477	-0.346888	0.176089	-1.96995	0.0488439	0.563732	RNF175
ENSG00000178996	1601.19	0.248187	0.125953	1.97048	0.0487839	0.563732	SNX18
ENSG00000186481	17.7441	1.38191	0.701248	1.97065	0.0487641	0.563732	ANKRD20A5P
ENSG00000188938	1325.28	-0.246836	0.125374	-1.96879	0.0489769	0.563732	FAM120AOS
ENSG00000198513	204.38	-0.446042	0.226269	-1.97129	0.0486906	0.563732	ATL1
ENSG00000198890	1457.12	-0.340211	0.172632	-1.97073	0.0487549	0.563732	PRMT6
ENSG00000215859	17.1469	1.09167	0.554535	1.96862	0.0489973	0.563732	RP6-74O6.2
ENSG00000237087	93.9491	1.6986	0.862703	1.96893	0.0489615	0.563732	AC068134.6
ENSG00000248973	7.59217	1.32539	0.673276	1.96858	0.0490019	0.563732	RP11-445O3.2
ENSG00000258405	494.423	1.29347	0.656925	1.96897	0.0489564	0.563732	ZNF578
ENSG00000086300	633.096	0.60958	0.309693	1.96834	0.0490293	0.563745	SNX10
ENSG00000109572	3730.77	0.267884	0.136125	1.96794	0.0490754	0.563875	CLCN3
ENSG00000131951	89.9511	0.699595	0.355678	1.96694	0.0491907	0.563875	LRRC9
ENSG00000150477	464.751	0.310931	0.158084	1.96687	0.0491978	0.563875	KIAA1328
ENSG00000180773	886.612	0.490213	0.24922	1.96699	0.0491843	0.563875	SLC36A4
ENSG00000207349	56.8494	-2.27884	1.15811	-1.96772	0.0491005	0.563875	RNVU1-17
ENSG00000274712	199.881	0.450735	0.229144	1.96704	0.0491787	0.563875	RP11-147L13.15
ENSG00000141076	1308.83	-0.33508	0.170446	-1.96589	0.0493108	0.564869	UTP4
ENSG00000048162	750.55	-0.329438	0.167642	-1.96512	0.0494001	0.565166	NOP16
ENSG00000130958	431.278	0.429868	0.218784	1.9648	0.0494369	0.565166	SLC35D2
ENSG00000196743	2178.33	0.217673	0.11079	1.96474	0.0494445	0.565166	GM2A
ENSG00000224745	25.9594	0.844318	0.429741	1.96471	0.0494474	0.565166	RP11-380G5.2
ENSG00000249850	75.2835	-0.399764	0.203491	-1.96453	0.0494681	0.565166	KRT18P31
ENSG00000103876	677.918	-0.270719	0.137842	-1.96397	0.0495331	0.565308	FAH
ENSG00000255085	65.5621	0.807386	0.411061	1.96415	0.0495129	0.565308	AF186192.5
ENSG00000224086	23.9156	-0.843545	0.429573	-1.96368	0.0495668	0.565393	LL22NC03-86G7.1
ENSG00000167113	817.929	-0.2634	0.134191	-1.96287	0.0496608	0.566165	COQ4
ENSG00000092200	27.9384	-0.731867	0.373036	-1.96192	0.0497719	0.56703	RPGRIP1
ENSG00000138101	1405.69	0.304654	0.155316	1.96151	0.0498197	0.56703	DTNB
ENSG00000149050	218.133	-0.547525	0.279233	-1.96082	0.0499002	0.56703	ZNF214
ENSG00000180185	481.554	-0.299884	0.152928	-1.96096	0.0498842	0.56703	FAHD1
ENSG00000183853	2401.7	-0.383046	0.195357	-1.96075	0.0499082	0.56703	KIRREL
ENSG00000232265	5.95154	-1.5079	0.769087	-1.96064	0.0499212	0.56703	XXyac-YX155B6.5
ENSG00000270696	557.932	0.512113	0.261067	1.96162	0.0498068	0.56703	RP11-342K6.1
ENSG00000100104	1001.95	-0.245477	0.125532	-1.9555	0.0505236	0.568098	SRRD
ENSG00000108590	182.324	-0.548326	0.28042	-1.95537	0.0505394	0.568098	MED31
ENSG00000109971	79783.1	-0.301887	0.154391	-1.95533	0.0505439	0.568098	HSPA8
ENSG00000112186	576.854	0.270883	0.138542	1.95524	0.050555	0.568098	CAP2
ENSG00000123395	1333.86	-0.243241	0.124455	-1.95445	0.0506484	0.568098	ATG101
ENSG00000128973	667.162	-0.339338	0.173514	-1.95568	0.050503	0.568098	CLN6
ENSG00000137992	1719.81	0.428012	0.218845	1.95578	0.0504915	0.568098	DBT
ENSG00000145692	58.1309	-0.821433	0.419237	-1.95935	0.0500716	0.568098	BHMT
ENSG00000155256	648.076	-0.255103	0.130454	-1.95551	0.0505231	0.568098	ZFYVE27
ENSG00000174109	324.88	-0.338807	0.173147	-1.95676	0.0503761	0.568098	C16orf91
ENSG00000181035	234.329	0.485672	0.248503	1.95439	0.050655	0.568098	SLC25A42
ENSG00000187650	76.5681	0.503837	0.257445	1.95707	0.0503397	0.568098	VMAC
ENSG00000196865	2375.72	0.354027	0.180929	1.95672	0.05038	0.568098	NHLRC2
ENSG00000197971	1342.97	0.278661	0.142318	1.95802	0.0502278	0.568098	MBP
ENSG00000214837	20.1779	-1.00284	0.512226	-1.95781	0.0502523	0.568098	LINC01347
ENSG00000225783	4326.51	0.609818	0.311862	1.95541	0.0505346	0.568098	MIAT
ENSG00000225849	6.72104	-1.1177	0.571084	-1.95715	0.0503296	0.568098	MKRN7P
ENSG00000236603	85.4471	-0.409104	0.20883	-1.95903	0.0501095	0.568098	RANP1
ENSG00000253598	17.9069	0.778408	0.397427	1.95862	0.0501578	0.568098	SLC10A5
ENSG00000256299	27.3418	0.864888	0.442405	1.95497	0.0505867	0.568098	RP11-989F5.3
ENSG00000257084	11.5947	-1.41204	0.722109	-1.95544	0.050531	0.568098	U47924.27
ENSG00000261455	36.1249	-0.628902	0.3211	-1.95859	0.0501609	0.568098	LINC01003
ENSG00000272927	15.1423	0.967513	0.49509	1.95422	0.0506754	0.568098	RP11-1191J2.5
ENSG00000275764	196.775	0.653073	0.334161	1.95436	0.0506582	0.568098	RP11-582E3.6
ENSG00000277011	19.0717	1.20048	0.613785	1.95587	0.0504806	0.568098	RP13-895J2.6
ENSG00000166938	1365.13	-0.42521	0.217621	-1.9539	0.0507128	0.568221	DIS3L
ENSG00000121274	1411.43	0.294902	0.151	1.95299	0.0508208	0.568543	PAPD5
ENSG00000154478	8.6639	-1.24563	0.637741	-1.95319	0.0507975	0.568543	GPR26
ENSG00000198732	44.0161	-0.874894	0.447918	-1.95325	0.0507905	0.568543	SMOC1
ENSG00000159208	249.815	0.472267	0.241879	1.95249	0.0508795	0.568608	CIART
ENSG00000276334	88.1913	0.383372	0.196341	1.95258	0.0508692	0.568608	AL133243.1
ENSG00000119950	975.424	0.340598	0.174526	1.95155	0.0509913	0.569301	MXI1
ENSG00000230552	18.7826	-1.1055	0.566477	-1.95153	0.0509944	0.569301	AC092162.1
ENSG00000214872	9.66324	-1.07446	0.550751	-1.95089	0.0510696	0.569844	SMTNL1
ENSG00000120328	52.4699	0.659983	0.338338	1.95066	0.0510974	0.569859	PCDHB12
ENSG00000184221	21.9409	1.11042	0.569344	1.95035	0.0511345	0.569903	OLIG1
ENSG00000197746	19682.2	0.253741	0.130111	1.95018	0.0511543	0.569903	PSAP
ENSG00000132698	968.286	0.363164	0.186302	1.94933	0.0512562	0.570269	RAB25
ENSG00000268093	10.3016	-0.973566	0.499459	-1.94924	0.0512667	0.570269	AC022154.7
ENSG00000268222	32.2495	-0.707994	0.363205	-1.94929	0.0512602	0.570269	EEF1A1P7
ENSG00000140403	321.812	-0.434339	0.222861	-1.94892	0.0513047	0.570397	DNAJA4
ENSG00000151414	834.963	0.543394	0.27889	1.94841	0.0513654	0.570596	NEK7
ENSG00000232559	183.378	-0.28899	0.148327	-1.94833	0.0513756	0.570596	GS1-124K5.12
ENSG00000141179	680.436	-0.221661	0.113834	-1.94723	0.0515066	0.571166	PCTP
ENSG00000213621	26.2477	-0.641253	0.32931	-1.94726	0.0515035	0.571166	RPSAP54
ENSG00000226913	50.5932	0.5515	0.283205	1.94735	0.0514926	0.571166	BSN-AS2
ENSG00000196656	35.8273	-0.675837	0.347177	-1.94666	0.0515751	0.57163	AC004057.1
ENSG00000232301	1539.29	0.827411	0.425145	1.94618	0.0516326	0.571973	RP11-132A1.3
ENSG00000166783	1263.99	0.278423	0.143118	1.94542	0.0517248	0.572699	KIAA0430
ENSG00000173611	1694.27	0.372603	0.19175	1.94317	0.0519958	0.575405	SCAI
ENSG00000125319	566.036	-0.264931	0.136503	-1.94085	0.0522766	0.575551	C17orf53
ENSG00000156510	9.65635	1.32837	0.683768	1.94271	0.0520509	0.575551	HKDC1
ENSG00000160539	208.617	0.459365	0.236617	1.94139	0.0522112	0.575551	PLPP7
ENSG00000170425	154.725	0.393242	0.202536	1.94159	0.0521864	0.575551	ADORA2B
ENSG00000177370	936.946	-0.211018	0.108717	-1.94098	0.0522603	0.575551	TIMM22
ENSG00000180304	4420.34	-0.200261	0.103173	-1.94102	0.0522556	0.575551	OAZ2
ENSG00000260035	193.645	-0.765955	0.394554	-1.94132	0.0522198	0.575551	CTD-2651B20.6
ENSG00000270722	23410.2	-0.547139	0.281727	-1.94209	0.052126	0.575551	U1
ENSG00000273014	31.3172	0.701329	0.361087	1.94227	0.0521043	0.575551	RP11-225B17.2
ENSG00000280374	22.837	0.684486	0.352415	1.94227	0.0521043	0.575551	RP11-337N6.3
ENSG00000103260	546.837	0.484336	0.249596	1.94048	0.0523208	0.575743	METRN
ENSG00000143315	396.874	-0.281533	0.145112	-1.94011	0.0523658	0.575943	PIGM
ENSG00000143543	1950.78	-0.255035	0.131496	-1.93948	0.0524424	0.576196	JTB
ENSG00000260088	8.5076	1.56162	0.80509	1.93969	0.0524176	0.576196	RP11-92G12.3
ENSG00000185697	317.677	0.375192	0.193504	1.93894	0.0525089	0.576632	MYBL1
ENSG00000148296	1816.28	-0.275419	0.142188	-1.93702	0.0527434	0.57717	SURF6
ENSG00000181481	427.995	0.292282	0.150826	1.93788	0.0526383	0.57717	RNF135
ENSG00000188389	33.1694	-0.952608	0.49169	-1.93742	0.0526946	0.57717	PDCD1
ENSG00000233381	8.13987	-1.027	0.530201	-1.937	0.0527456	0.57717	AK4P3
ENSG00000240622	21.331	-0.850033	0.438755	-1.93738	0.0526995	0.57717	RPL7P15
ENSG00000245156	6.22667	-1.45612	0.751493	-1.93763	0.0526681	0.57717	RP11-867G23.3
ENSG00000257803	37.8088	0.661886	0.341678	1.93717	0.0527252	0.57717	RP11-575G13.2
ENSG00000034533	376.097	-0.312453	0.161468	-1.93508	0.0529809	0.577511	ASTE1
ENSG00000064687	587.451	0.338262	0.17488	1.93425	0.0530823	0.577511	ABCA7
ENSG00000090316	2314.87	-0.30694	0.158661	-1.93457	0.0530435	0.577511	MAEA
ENSG00000111981	69.0039	0.755848	0.390353	1.93632	0.0528287	0.577511	ULBP1
ENSG00000156395	114.422	-0.603165	0.311854	-1.93413	0.0530975	0.577511	SORCS3
ENSG00000166292	28.1694	-0.821004	0.424374	-1.93462	0.0530366	0.577511	TMEM100
ENSG00000168300	2319.1	0.45284	0.233886	1.93615	0.0528487	0.577511	PCMTD1
ENSG00000221978	2742.6	-0.240293	0.124145	-1.93558	0.0529191	0.577511	CCNL2
ENSG00000226668	9.98722	-1.21705	0.628991	-1.93492	0.0529998	0.577511	RP11-526D8.7
ENSG00000229970	45.7693	0.606576	0.313378	1.9356	0.0529161	0.577511	AC007128.1
ENSG00000255495	21.1397	-0.773591	0.399971	-1.93412	0.0530989	0.577511	AC145124.2
ENSG00000258072	80.6289	0.560613	0.289829	1.93429	0.0530781	0.577511	RP11-554D14.2
ENSG00000280310	15.3207	0.839546	0.434196	1.93356	0.0531667	0.577956	RP11-326I19.2
ENSG00000196177	836.625	0.32384	0.167517	1.93318	0.0532146	0.578184	ACADSB
ENSG00000250069	8.17219	1.18228	0.611664	1.93289	0.0532498	0.578275	CTB-131B5.2
ENSG00000205155	247.094	-0.325495	0.168428	-1.93255	0.0532915	0.578435	PSENEN
ENSG00000079739	2681.52	0.463436	0.239928	1.93156	0.0534138	0.578565	PGM1
ENSG00000128266	889.828	0.311758	0.161419	1.93137	0.0534379	0.578565	GNAZ
ENSG00000139800	3401.75	0.316618	0.163893	1.93186	0.0533767	0.578565	ZIC5
ENSG00000168014	1176.98	-0.286278	0.148193	-1.93179	0.0533853	0.578565	C2CD3
ENSG00000205423	466.358	0.387177	0.200399	1.93203	0.0533563	0.578565	CNEP1R1
ENSG00000090520	1269.49	-0.304336	0.157753	-1.9292	0.0537065	0.579432	DNAJB11
ENSG00000115307	2032.42	-0.211142	0.109387	-1.93023	0.053578	0.579432	AUP1
ENSG00000163293	256.968	0.404195	0.209503	1.9293	0.053693	0.579432	NIPAL1
ENSG00000171848	5125.97	-0.371381	0.192503	-1.92922	0.0537033	0.579432	RRM2
ENSG00000176654	200.305	0.850062	0.440616	1.92926	0.053699	0.579432	NANOGP1
ENSG00000213551	2278.47	-0.272836	0.141384	-1.92975	0.0536383	0.579432	DNAJC9
ENSG00000254560	55.5803	0.667247	0.34576	1.9298	0.0536316	0.579432	BBOX1-AS1
ENSG00000135457	1656.62	-0.238001	0.123402	-1.92866	0.0537729	0.579635	TFCP2
ENSG00000144119	8.66114	-1.32557	0.687321	-1.92861	0.0537792	0.579635	C1QL2
ENSG00000100146	66.354	0.594118	0.308287	1.92716	0.0539595	0.579871	SOX10
ENSG00000107560	1197.6	0.312306	0.162008	1.92771	0.0538907	0.579871	RAB11FIP2
ENSG00000153982	213.79	0.389926	0.202252	1.92792	0.0538652	0.579871	GDPD1
[truncated: 28,488 more rows]

## Sheet: 71QvsWT
	baseMean	log2FoldChange	lfcSE	stat	pvalue	padj	gene_name
ENSG00000277918	33975.1	6.28607	0.318258	19.7515	7.78821e-87	1.67789e-82	U1
ENSG00000255192	429.567	5.16189	0.434374	11.8835	1.44163e-32	1.55293e-28	NANOGP8
ENSG00000175548	366.744	2.88302	0.248026	11.6239	3.11628e-31	2.2379e-27	ALG10B
ENSG00000155827	3108.78	-1.18277	0.114496	-10.3302	5.14618e-25	2.77173e-21	RNF20
ENSG00000197181	170.226	3.19423	0.325061	9.82658	8.65081e-23	3.72746e-19	PIWIL2
ENSG00000278630	17.1798	5.70469	1.34001	4.25722	2.06988e-05	0.00441519	RP11-78L16.1
ENSG00000165899	158.874	3.43496	0.352062	9.75669	1.72696e-22	6.20094e-19	OTOGL
ENSG00000186234	6.94619	4.69588	1.33925	3.50636	0.000454282	0.0414095	FAM86MP
ENSG00000274452	26.6993	4.52802	0.623717	7.25974	3.87844e-13	6.9631e-10	U2
ENSG00000106013	21.2089	4.37907	0.895413	4.89056	1.00548e-06	0.000361033	ANKRD7
ENSG00000080007	37.7085	4.25628	0.685571	6.20837	5.35384e-10	4.61373e-07	DDX43
ENSG00000111913	633.456	-2.77541	0.333431	-8.32377	8.52075e-17	2.62244e-13	FAM65B
ENSG00000184860	36.7053	4.0315	0.914477	4.40853	1.04073e-05	0.00257717	SDR42E1
ENSG00000203907	18.1458	3.93949	0.712412	5.5298	3.20599e-08	1.80282e-05	OOEP
ENSG00000274276	284.713	-3.10256	0.377149	-8.22637	1.92976e-16	5.19685e-13	CBSL
ENSG00000179750	166.08	-3.28338	0.401729	-8.17313	3.00499e-16	7.19329e-13	APOBEC3B
ENSG00000248663	15.7721	3.40733	0.794868	4.28666	1.81382e-05	0.00398744	LINC00992
ENSG00000100721	38.2662	3.39159	0.476992	7.11037	1.15733e-12	1.78097e-09	TCL1A
ENSG00000185610	14.9104	3.33579	0.754038	4.42391	9.69314e-06	0.00245681	DBX2
ENSG00000258376	46.6739	3.29303	0.751136	4.38407	1.16485e-05	0.00285176	RP4-647C14.2
ENSG00000132561	653.894	-1.15251	0.14734	-7.82207	5.19599e-15	1.11943e-11	MATN2
ENSG00000198535	9.92136	3.14717	0.830923	3.78756	0.000152136	0.0195872	C2CD4A
ENSG00000278272	6537.65	2.9798	0.381941	7.80173	6.10653e-15	1.19599e-11	HIST1H3C
ENSG00000197134	131.362	8.04348	1.11247	7.23032	4.81865e-13	7.98562e-10	ZNF257
ENSG00000185880	565.577	1.12953	0.161906	6.97644	3.02764e-12	4.34849e-09	TRIM69
ENSG00000206149	509.243	-1.39276	0.200839	-6.93472	4.07032e-12	5.48069e-09	HERC2P9
ENSG00000260232	15.3597	2.73282	0.609567	4.48321	7.353e-06	0.00198016	PWRN4
ENSG00000276410	2934.41	2.83218	0.411812	6.87737	6.09674e-12	7.72636e-09	HIST1H2BB
ENSG00000261622	13.246	2.71013	0.66718	4.06207	4.86389e-05	0.00845062	RP11-484P15.1
ENSG00000255374	28.3604	2.69977	0.626798	4.30724	1.65308e-05	0.00374883	TAS2R43
ENSG00000234816	21.8664	2.68557	0.519279	5.17173	2.31931e-07	9.7975e-05	HIST1H2APS5
ENSG00000279377	349.41	12.3802	1.81624	6.81643	9.33275e-12	1.05824e-08	AC003973.3
ENSG00000181234	32.7749	2.54194	0.603132	4.21458	2.50248e-05	0.00508617	TMEM132C
ENSG00000256274	79.4092	2.04524	0.309599	6.60611	3.94555e-11	4.25015e-08	TAS2R64P
ENSG00000215186	29.3912	2.52696	0.50371	5.01669	5.25695e-07	0.000202242	GOLGA6B
ENSG00000259723	11.8342	2.48412	0.649391	3.82531	0.000130606	0.017369	RP5-823G15.5
ENSG00000188257	33.227	2.4568	0.599426	4.09859	4.15682e-05	0.00740119	PLA2G2A
ENSG00000215252	280.727	-1.91687	0.296584	-6.46314	1.0255e-10	1.05207e-07	GOLGA8B
ENSG00000259065	14.0341	2.42102	0.603438	4.01204	6.0197e-05	0.00975101	RP5-1021I20.1
ENSG00000278266	17.5198	2.22162	0.60267	3.68629	0.000227545	0.0257912	RP11-575F12.3
ENSG00000124762	800.537	1.16124	0.186234	6.23535	4.50769e-10	4.22233e-07	CDKN1A
ENSG00000258670	35.5134	2.19162	0.627375	3.49331	0.000477066	0.042647	RP11-1042B17.3
ENSG00000081138	95.3472	-1.8672	0.29944	-6.23564	4.49924e-10	4.22233e-07	CDH7
ENSG00000160321	812.56	10.1737	1.63535	6.22111	4.93643e-10	4.43127e-07	ZNF208
ENSG00000226686	64.916	3.47096	0.566082	6.13155	8.7025e-10	6.88438e-07	LINC01535
ENSG00000244009	24.2684	1.91429	0.521246	3.67254	0.000240156	0.0265329	B3GAT3P1
ENSG00000271369	102.141	2.19411	0.357449	6.13825	8.34342e-10	6.88438e-07	RP11-350D17.3
ENSG00000272983	36.0586	1.8939	0.515522	3.67376	0.000239009	0.0265329	RP11-508N22.12
ENSG00000229271	33.4372	1.86302	0.455857	4.08686	4.37248e-05	0.0076586	AC091493.2
ENSG00000154529	63.3617	-2.50349	0.40859	-6.12714	8.94739e-10	6.88438e-07	CNTNAP3B
ENSG00000220008	31.0034	1.82848	0.476582	3.83666	0.000124718	0.0167933	LINGO3
ENSG00000143643	481.007	-0.88823	0.146209	-6.07507	1.23936e-09	9.20716e-07	TTC13
ENSG00000003393	3863.65	-0.74266	0.124858	-5.94805	2.71351e-09	1.94866e-06	ALS2
ENSG00000196502	227.151	-1.63243	0.279303	-5.84465	5.07639e-09	3.52793e-06	SULT1A1
ENSG00000225868	106.347	1.6489	0.283012	5.82624	5.669e-09	3.81665e-06	AC016582.2
ENSG00000206652	42.4891	1.77406	0.438401	4.04666	5.19529e-05	0.00880905	RNU1-1
ENSG00000198840	2863.67	1.0524	0.187364	5.61686	1.94456e-08	1.23217e-05	MT-ND3
ENSG00000144115	203.499	-1.44366	0.258887	-5.5764	2.45541e-08	1.51141e-05	THNSL2
ENSG00000130513	453.067	2.5341	0.456055	5.55657	2.75132e-08	1.64651e-05	GDF15
ENSG00000125337	24.9034	1.66947	0.441384	3.78234	0.000155359	0.0198051	KIF25
ENSG00000100311	451.667	1.33544	0.241634	5.52668	3.26355e-08	1.80282e-05	PDGFB
ENSG00000100297	12148.9	-0.78664	0.142325	-5.52707	3.25622e-08	1.80282e-05	MCM5
ENSG00000267313	335.993	1.18719	0.21535	5.51285	3.53079e-08	1.90168e-05	KC6
ENSG00000203799	113.545	1.63806	0.304041	5.38762	7.13968e-08	3.6941e-05	CCDC162P
ENSG00000269067	361.467	9.01655	1.68192	5.36088	8.2818e-08	4.14937e-05	ZNF728
ENSG00000142686	383.781	-0.979294	0.183557	-5.33509	9.54949e-08	4.67578e-05	C1orf216
ENSG00000263551	96.6456	1.74212	0.331275	5.25884	1.44965e-07	6.94028e-05	RP11-78F17.1
ENSG00000267662	42.4305	1.55649	0.442947	3.51394	0.000441513	0.0408239	AC007796.1
ENSG00000259345	46.2401	1.50162	0.331161	4.53441	5.77636e-06	0.00165928	RP11-624L4.1
ENSG00000276476	117.646	3.03264	0.579271	5.23526	1.6475e-07	7.57756e-05	LINC00540
ENSG00000261235	30.5626	1.48491	0.402724	3.68717	0.000226759	0.0257912	RP11-510J16.5
ENSG00000264448	30.9165	1.47103	0.422405	3.4825	0.000496746	0.0440407	MIR378D2
ENSG00000251533	29.7984	1.46939	0.408783	3.59454	0.000324969	0.0325634	LINC00605
ENSG00000237945	406.592	1.12033	0.214023	5.23464	1.65311e-07	7.57756e-05	LINC00649
ENSG00000106536	135.549	1.43215	0.274748	5.2126	1.86209e-07	8.35768e-05	POU6F2
ENSG00000176124	259.926	0.907411	0.174604	5.19698	2.02556e-07	8.90583e-05	DLEU1
ENSG00000250337	1222.08	1.8133	0.350545	5.17281	2.30605e-07	9.7975e-05	LINC01021
ENSG00000262874	34.2398	1.38273	0.360677	3.83371	0.000126224	0.0168905	C19orf84
ENSG00000204644	138.039	2.55209	0.498595	5.11857	3.07856e-07	0.000127547	ZFP57
ENSG00000197462	322.008	4.07578	0.805871	5.05761	4.2455e-07	0.00016938	AC005276.1
ENSG00000100281	2119.06	-0.571044	0.113649	-5.02461	5.0445e-07	0.000197598	HMGXB4
ENSG00000203279	297.431	-1.2019	0.243726	-4.93135	8.16635e-07	0.000308659	RP11-498P14.5
ENSG00000280623	77.3326	1.94028	0.395033	4.91169	9.02936e-07	0.000335394	PCAT14
ENSG00000105419	735.194	1.12535	0.229921	4.89451	9.85522e-07	0.000359866	MEIS3
ENSG00000263513	116.101	1.29471	0.265192	4.88216	1.04931e-06	0.000370595	FAM72C
ENSG00000267751	123.232	1.37161	0.282256	4.85947	1.17703e-06	0.000408999	AC009005.2
ENSG00000267327	72.6077	1.65121	0.341233	4.83895	1.3053e-06	0.00044637	CTD-2008L17.1
ENSG00000100867	51.0716	-2.56136	0.531323	-4.82073	1.43035e-06	0.000481493	DHRS2
ENSG00000158125	272.424	1.13997	0.237575	4.79835	1.59977e-06	0.000530237	XDH
ENSG00000157150	95.9767	-1.6264	0.339568	-4.78961	1.67104e-06	0.000545467	TIMP4
ENSG00000105143	574.915	0.909835	0.190861	4.76701	1.8698e-06	0.000601239	SLC1A6
ENSG00000258405	494.423	1.90807	0.401559	4.75165	2.0176e-06	0.00062996	ZNF578
ENSG00000162039	178.513	1.69352	0.356275	4.75339	2.00033e-06	0.00062996	MEIOB
ENSG00000275405	125.794	2.06138	0.445338	4.6288	3.67797e-06	0.00113197	U1
ENSG00000125730	385.579	1.19834	0.260217	4.60514	4.12196e-06	0.00123932	C3
ENSG00000177119	4644.68	-0.727158	0.157936	-4.60414	4.14182e-06	0.00123932	ANO6
ENSG00000245848	170.866	0.916594	0.200931	4.56174	5.07322e-06	0.00149723	CEBPA
ENSG00000059378	347.232	0.891862	0.195757	4.55596	5.21463e-06	0.00151816	PARP12
ENSG00000233016	927.092	-0.635858	0.140327	-4.53124	5.86382e-06	0.00166224	SNHG7
ENSG00000064989	306.375	1.81194	0.403277	4.49305	7.02108e-06	0.00193926	CALCRL
ENSG00000139835	1628.6	0.877808	0.195326	4.49407	6.98751e-06	0.00193926	GRTP1
ENSG00000090857	3451.62	-1.02695	0.228899	-4.48647	7.24123e-06	0.00197475	PDPR
ENSG00000276345	135.941	-5.20759	1.16627	-4.46517	8.00045e-06	0.00212792	AC004556.1
ENSG00000163191	688.58	0.862993	0.193738	4.45443	8.41153e-06	0.00220997	S100A11
ENSG00000185345	59.3663	1.73712	0.391673	4.43514	9.20108e-06	0.00235986	PARK2
ENSG00000181192	4811.18	0.756618	0.170524	4.43702	9.12122e-06	0.00235986	DHTKD1
ENSG00000141376	802.492	0.806194	0.182546	4.41638	1.00368e-05	0.00251433	BCAS3
ENSG00000260776	377.147	1.46766	0.335462	4.37505	1.21404e-05	0.00293881	RP11-114H24.2
ENSG00000224114	142.442	2.44593	0.563091	4.34376	1.40066e-05	0.00335288	RP11-343H5.4
ENSG00000236404	307.28	1.11838	0.25767	4.34036	1.4225e-05	0.00336773	VLDLR-AS1
ENSG00000144681	465.287	-0.922086	0.21324	-4.32417	1.53106e-05	0.00358534	STAC
ENSG00000183722	144.399	-1.67691	0.388774	-4.31332	1.60818e-05	0.00372544	LHFP
ENSG00000180694	3514.71	1.85577	0.43119	4.30384	1.67862e-05	0.0037671	TMEM64
ENSG00000254585	178.613	1.36802	0.318911	4.28966	1.78949e-05	0.0039745	MAGEL2
ENSG00000186417	82.5951	1.18624	0.277465	4.27527	1.90905e-05	0.00415439	GLDN
ENSG00000120784	746.986	0.884578	0.207015	4.27302	1.92847e-05	0.00415469	ZFP30
ENSG00000225178	1119.17	0.79787	0.187561	4.25392	2.10058e-05	0.00443676	RPSAP58
ENSG00000258592	65.8863	1.65564	0.390229	4.24274	2.20806e-05	0.00461849	RP11-108M12.3
ENSG00000135929	278.781	1.63649	0.387395	4.22435	2.39634e-05	0.0049641	CYP27A1
ENSG00000245532	1155.81	1.21893	0.288721	4.22183	2.42327e-05	0.00497208	NEAT1
ENSG00000257800	73.5273	1.29115	0.306662	4.21034	2.54991e-05	0.00513414	FNBP1P1
ENSG00000170248	4544.93	0.672712	0.160531	4.19054	2.7829e-05	0.00540133	PDCD6IP
ENSG00000182636	1489.49	1.06882	0.255862	4.17731	2.94974e-05	0.00562383	NDN
ENSG00000241015	415.455	-0.785005	0.188396	-4.16677	3.08941e-05	0.0058037	TPM3P9
ENSG00000120332	53.0347	-1.27086	0.305044	-4.16614	3.09797e-05	0.0058037	TNN
ENSG00000215030	1140.19	-3.0041	0.725723	-4.13947	3.48113e-05	0.00641004	RPL13P12
ENSG00000154265	132.561	-1.29315	0.312943	-4.13224	3.59247e-05	0.006559	ABCA5
ENSG00000075673	116.712	1.10205	0.267523	4.11947	3.79747e-05	0.00687502	ATP12A
ENSG00000175592	75.8063	1.31921	0.321731	4.10036	4.12499e-05	0.00740119	FOSL1
ENSG00000182983	86.0287	-5.86398	1.43251	-4.0935	4.24905e-05	0.0075034	ZNF662
ENSG00000123119	278.178	1.82382	0.449355	4.05875	4.93357e-05	0.0085031	NECAB1
ENSG00000278023	260.435	0.968035	0.239243	4.04624	5.20467e-05	0.00880905	RDM1
ENSG00000158555	204.128	-0.812437	0.200914	-4.04371	5.26124e-05	0.00880905	GDPD5
ENSG00000205534	151.943	0.85129	0.211672	4.02174	5.77693e-05	0.00950063	SMG1P2
ENSG00000124610	1968.54	2.72548	0.67848	4.01704	5.89349e-05	0.0096189	HIST1H1A
ENSG00000185090	123.717	0.990842	0.247782	3.99884	6.36543e-05	0.0102341	MANEAL
ENSG00000173295	307.68	1.05569	0.264574	3.99013	6.6037e-05	0.0105385	FAM86B3P
ENSG00000175265	333.879	0.730525	0.18368	3.97717	6.97406e-05	0.0110477	GOLGA8A
ENSG00000178852	120.088	1.44575	0.363868	3.97327	7.08917e-05	0.0111481	EFCAB13
ENSG00000260920	183.061	0.865274	0.218393	3.96201	7.4321e-05	0.0116027	RP1-228H13.5
ENSG00000029534	855.437	0.904867	0.229417	3.9442	8.00673e-05	0.0123212	ANK1
ENSG00000196083	366.781	0.668993	0.16974	3.94129	8.1045e-05	0.0123526	IL1RAP
ENSG00000111788	611.337	-0.769024	0.195174	-3.94019	8.14181e-05	0.0123526	RP11-22B23.1
ENSG00000167772	79.866	1.24244	0.315665	3.93593	8.28737e-05	0.0124855	ANGPTL4
ENSG00000163071	90.9039	1.081	0.275075	3.92984	8.50041e-05	0.012695	SPATA18
ENSG00000188747	89.9396	1.27239	0.324362	3.92274	8.75492e-05	0.0129189	NOXA1
ENSG00000166435	511.655	0.966292	0.24655	3.91926	8.88225e-05	0.0129297	XRRA1
ENSG00000156113	223.329	-0.981947	0.250496	-3.92	8.85472e-05	0.0129297	KCNMA1
ENSG00000168209	1930.59	1.02675	0.262666	3.90896	9.26934e-05	0.0134026	DDIT4
ENSG00000117305	752.418	0.55165	0.141249	3.90553	9.40199e-05	0.0135038	HMGCL
ENSG00000282100	74.3905	-1.27	0.325927	-3.89657	9.75649e-05	0.0139201	HSP90AB4P
ENSG00000111199	173.639	0.945148	0.242993	3.88961	0.000100406	0.0142313	TRPV4
ENSG00000142530	314.257	0.877762	0.226163	3.88111	0.000103983	0.0146364	FAM71E1
ENSG00000166147	783.195	-1.48072	0.381667	-3.87961	0.000104623	0.0146364	FBN1
ENSG00000188483	270.637	1.3238	0.342338	3.86694	0.000110209	0.0153183	IER5L
ENSG00000115318	429.757	1.05415	0.273478	3.8546	0.00011592	0.0159801	LOXL3
ENSG00000074410	214.418	-1.1804	0.306321	-3.85347	0.000116454	0.0159801	CA12
ENSG00000139629	461.514	-0.664991	0.17305	-3.84276	0.000121658	0.0165886	GALNT6
ENSG00000255666	844.087	1.07488	0.281474	3.81875	0.000134132	0.0177284	RP11-867G2.6
ENSG00000099860	272.273	1.01917	0.267153	3.81495	0.000136208	0.0178931	GADD45B
ENSG00000142273	621.667	0.719104	0.189598	3.79279	0.000148964	0.0193331	CBLC
ENSG00000160216	258.008	1.16298	0.307133	3.78657	0.000152741	0.0195872	AGPAT3
ENSG00000230937	2214.39	1.78492	0.472874	3.77462	0.000160251	0.0203085	MIR205HG
ENSG00000127585	212.153	1.08195	0.287117	3.76832	0.000164348	0.0203489	FBXL16
ENSG00000184381	601.282	1.02925	0.273111	3.76863	0.000164146	0.0203489	PLA2G6
ENSG00000111321	183.494	0.645616	0.171236	3.77032	0.000163039	0.0203489	LTBR
ENSG00000185052	208.25	-0.906542	0.240673	-3.76669	0.000165423	0.020365	SLC24A3
ENSG00000110107	4504.93	-0.525338	0.139531	-3.76502	0.000166533	0.0203852	PRPF19
ENSG00000105499	240.219	-1.758	0.467127	-3.76344	0.000167594	0.0203991	PLA2G4C
ENSG00000198804	67485.8	0.876967	0.23333	3.75848	0.000170946	0.0206902	MT-CO1
ENSG00000250682	108.979	0.954047	0.254284	3.7519	0.0001755	0.0211227	LINC00491
ENSG00000104635	11758.8	-0.541862	0.145338	-3.72829	0.000192781	0.0228779	SLC39A14
ENSG00000175445	481.077	-1.26172	0.338474	-3.72766	0.000193268	0.0228779	LPL
ENSG00000278970	219.347	0.775282	0.208097	3.72558	0.000194867	0.0229411	HEIH
ENSG00000143951	738.927	-0.833558	0.224409	-3.71446	0.000203638	0.0238434	WDPCP
ENSG00000177106	754.274	0.649164	0.175068	3.70808	0.00020884	0.0243202	EPS8L2
ENSG00000125414	112.19	-1.57204	0.424436	-3.70384	0.000212364	0.0245977	MYH2
ENSG00000186301	109.467	1.04451	0.282356	3.69926	0.000216233	0.0249119	MST1P2
ENSG00000051180	821.165	-0.575448	0.155953	-3.68988	0.000224364	0.0257111	RAD51
ENSG00000246792	286.986	1.62195	0.440144	3.68505	0.000228654	0.0257912	RP11-68L18.1
ENSG00000206579	257.856	0.906311	0.246227	3.68079	0.000232514	0.02609	XKR4
ENSG00000251363	127.824	1.49259	0.405726	3.67883	0.00023431	0.0261554	RP11-129M6.1
ENSG00000044574	11161.3	-0.557597	0.152255	-3.66226	0.000250004	0.02748	HSPA5
ENSG00000108551	129.535	1.05985	0.289627	3.65936	0.000252849	0.0276517	RASD1
ENSG00000116574	438.489	0.903173	0.247682	3.6465	0.000265834	0.0289249	RHOU
ENSG00000065328	3337.6	-0.571695	0.15693	-3.643	0.00026948	0.0291742	MCM10
ENSG00000137558	113.909	1.38938	0.381996	3.63716	0.000275658	0.0296939	PI15
ENSG00000125124	1087.41	0.689294	0.189656	3.63444	0.000278581	0.0298595	BBS2
ENSG00000176978	295.734	1.00467	0.276704	3.63084	0.000282503	0.0301299	DPP7
ENSG00000223509	68.519	1.02009	0.281062	3.62941	0.000284068	0.0301476	RP11-632K20.7
ENSG00000091656	403.422	0.761737	0.210251	3.62299	0.000291221	0.0307552	ZFHX4
ENSG00000274090	649.835	1.10727	0.305843	3.62039	0.000294163	0.0309143	RP11-415G4.1
ENSG00000167608	145.25	1.23261	0.341107	3.61355	0.000302029	0.0314343	TMC4
ENSG00000173705	131.371	-1.36526	0.377957	-3.61222	0.000303586	0.0314445	SUSD5
ENSG00000182718	4029.25	-1.13336	0.313982	-3.60965	0.000306615	0.0316063	ANXA2
ENSG00000141698	1821.39	-0.442699	0.122813	-3.60465	0.00031258	0.0320677	NT5C3B
ENSG00000145730	2938.37	-0.589833	0.163728	-3.60251	0.000315155	0.0321207	PAM
ENSG00000144476	50.9906	-1.22976	0.341433	-3.60175	0.000316078	0.0321207	ACKR3
ENSG00000162782	104.979	1.19199	0.331298	3.59794	0.000320746	0.032442	TDRD5
ENSG00000164128	387.238	1.23019	0.342153	3.59543	0.000323852	0.0325634	NPY1R
ENSG00000185070	391.463	-0.805221	0.224124	-3.59275	0.000327206	0.0326358	FLRT2
ENSG00000153157	104.487	-0.975512	0.271667	-3.59084	0.000329616	0.0327246	SYCP2L
ENSG00000120800	5446.45	-0.67829	0.189407	-3.58112	0.000342123	0.0337122	UTP20
ENSG00000197410	108.329	-1.06664	0.297887	-3.58069	0.000342692	0.0337122	DCHS2
ENSG00000162374	80.821	1.19603	0.334539	3.57515	0.000350022	0.0342767	ELAVL4
ENSG00000071282	617.109	-1.01994	0.286185	-3.56391	0.000365375	0.0356182	LMCD1
ENSG00000197279	708.458	0.961414	0.270286	3.55703	0.000375077	0.0363993	ZNF165
ENSG00000159374	311.302	0.811393	0.229001	3.54318	0.000395338	0.0381935	M1AP
ENSG00000162944	154.929	0.806703	0.227831	3.5408	0.000398923	0.0383678	RFTN2
ENSG00000144306	281.247	0.989385	0.27973	3.53693	0.000404805	0.0387605	SCRN3
ENSG00000167617	114.878	1.06246	0.300515	3.53546	0.000407071	0.038805	CDC42EP5
ENSG00000174307	463.395	0.503267	0.14246	3.5327	0.000411343	0.0390395	PHLDA3
ENSG00000169856	262.258	1.6583	0.470328	3.52584	0.000422148	0.0397732	ONECUT1
ENSG00000259445	57.5408	1.34546	0.381642	3.52545	0.000422766	0.0397732	RP11-276M12.1
ENSG00000163596	278.79	1.3771	0.391109	3.52102	0.000429897	0.0399211	ICA1L
ENSG00000260066	37.7412	-1.43323	0.38261	-3.74593	0.000179729	0.0215116	CTD-2587M23.1
ENSG00000103260	546.837	0.767083	0.21782	3.52163	0.000428901	0.0399211	METRN
ENSG00000124541	2062.09	-0.554912	0.157579	-3.52149	0.00042913	0.0399211	RRP36
ENSG00000213539	28.6487	-1.55605	0.430531	-3.61427	0.000301197	0.0314343	YBX1P6
ENSG00000248275	158.796	-0.704369	0.20067	-3.51008	0.000447975	0.0412443	TRIM52-AS1
ENSG00000100583	37.7219	-1.61689	0.390186	-4.1439	3.41446e-05	0.00634148	SAMD15
ENSG00000131507	1376.58	0.503486	0.143503	3.50854	0.000450569	0.0413067	NDFIP1
ENSG00000182621	657.208	1.01741	0.290222	3.50563	0.000455535	0.0414095	PLCB1
ENSG00000134574	1911.95	0.582491	0.16644	3.4997	0.00046578	0.0420736	DDB2
ENSG00000241478	29.3202	-1.75052	0.416913	-4.19876	2.68375e-05	0.00530448	HSPA8P9
ENSG00000255397	77.2435	-1.15357	0.329671	-3.49915	0.000466747	0.0420736	AC022182.2
ENSG00000143318	28.6419	-1.79934	0.446873	-4.02652	5.6608e-05	0.00938124	CASQ1
ENSG00000275074	79.357	1.23921	0.354637	3.4943	0.00047531	0.042647	NUDT18
ENSG00000177551	85.0812	0.878594	0.25182	3.48898	0.000484869	0.0431654	NHLH2
ENSG00000147364	539.545	0.849095	0.245116	3.46405	0.000532111	0.046791	FBXO25
ENSG00000235559	18.062	-2.2194	0.57798	-3.83993	0.000123072	0.0166758	NOP56P1
ENSG00000226816	49.2645	-2.3629	0.601461	-3.9286	8.54427e-05	0.012695	AC005082.12
ENSG00000112146	739.289	-0.583693	0.168613	-3.46174	0.000536703	0.0470029	FBXO9
ENSG00000115155	28.0182	-2.50701	0.440973	-5.68517	1.30681e-08	8.53152e-06	OTOF
ENSG00000240342	4751.56	0.491773	0.14233	3.45517	0.000549951	0.0476256	RPS2P5
ENSG00000189334	45.3852	-2.56373	0.3741	-6.85305	7.22917e-12	8.65251e-09	S100A14
ENSG00000186205	1526.18	-0.473373	0.137014	-3.45493	0.000550444	0.0476256	MARC1
ENSG00000273312	12.8064	-2.82586	0.713758	-3.95913	7.52244e-05	0.0116592	RP11-425A6.5
ENSG00000213025	27.0848	-2.90223	0.693744	-4.18344	2.87132e-05	0.00552318	COX20P1
ENSG00000081051	57.5062	-2.03249	0.588067	-3.45622	0.000547807	0.0476256	AFP
ENSG00000187824	103.35	0.89899	0.260739	3.44785	0.000565069	0.0486953	TMEM220
ENSG00000269001	340.557	0.791197	0.229756	3.44364	0.000573941	0.0492629	CTD-2245F17.3
ENSG00000182070	15.5232	-3.33492	0.87642	-3.80516	0.000141715	0.0185036	OR52A1
ENSG00000263503	7.9211	-3.69299	1.06484	-3.46811	0.00052414	0.046279	RP11-707O23.5
ENSG00000234814	13.4384	-5.05249	1.20238	-4.20207	2.6449e-05	0.00527609	SVILP1
ENSG00000264204	13.839	-5.16062	1.19716	-4.31071	1.62731e-05	0.00372967	AGAP7P
ENSG00000064655	67.1874	-1.0968	0.318888	-3.43945	0.000582893	0.0498327	EYA2
ENSG00000277734	19.6183	-5.22452	0.970006	-5.38607	7.20164e-08	3.6941e-05	TRAC
ENSG00000274419	6.66865	-5.4453	1.34681	-4.04311	5.27463e-05	0.00880905	TBC1D3D
ENSG00000207425	7.28101	-5.59379	1.33311	-4.19603	2.71631e-05	0.00532002	Y
ENSG00000169252	73.6551	1.18238	0.343938	3.43778	0.000586505	0.0499434	ADRB2
ENSG00000251654	9.37085	-6.57018	1.29511	-5.07308	3.9143e-07	0.000159113	RP11-192H6.2
ENSG00000204007	7.45067	-6.68839	1.77335	-3.7716	0.000162203	0.0203489	GLT6D1
ENSG00000163735	421.74	1.37614	0.400524	3.43585	0.000590704	0.0501028	CXCL5
ENSG00000139890	59.9479	-0.923652	0.269335	-3.42938	0.000604969	0.0511116	REM2
ENSG00000276007	70.4441	1.33107	0.388353	3.42748	0.000609214	0.0512692	RP11-358L22.3
ENSG00000176714	123.239	0.807969	0.236196	3.42076	0.000624468	0.0523418	CCDC121
ENSG00000243566	44.478	-2.00188	0.585389	-3.41974	0.000626818	0.0523418	UPK3B
ENSG00000121310	363.212	1.02292	0.299352	3.41711	0.000632908	0.0526462	ECHDC2
ENSG00000170430	667.26	0.541212	0.158516	3.41424	0.000639597	0.0527949	MGMT
ENSG00000214654	163.358	-0.925965	0.271156	-3.41488	0.00063809	0.0527949	RP11-27I1.4
ENSG00000254180	24.8244	2.00685	0.589244	3.4058	0.0006597	0.0542465	AB015752.3
ENSG00000254911	51.1826	1.06236	0.312274	3.402	0.000668946	0.0547976	SCARNA9
ENSG00000188001	51.5883	1.08325	0.318872	3.39714	0.000680942	0.055569	TPRG1
ENSG00000147852	2464.98	0.706987	0.20843	3.39197	0.000693926	0.0564149	VLDLR
ENSG00000166268	51.8874	-1.12422	0.331773	-3.38852	0.000702705	0.0569138	MYRFL
ENSG00000172403	229.564	-1.26682	0.374626	-3.38156	0.00072075	0.0581567	SYNPO2
ENSG00000121898	414.181	1.22631	0.362933	3.37888	0.000727805	0.0585069	CPXM2
ENSG00000146729	2254.2	0.716404	0.212159	3.37673	0.000733532	0.058748	GBAS
ENSG00000172250	44.0173	1.56679	0.464583	3.37246	0.00074501	0.0594463	SERHL
ENSG00000142698	187.874	-1.22248	0.363058	-3.36716	0.000759457	0.0601535	C1orf94
ENSG00000224086	23.9156	-1.55279	0.461052	-3.36793	0.000757351	0.0601535	LL22NC03-86G7.1
ENSG00000176654	200.305	1.33655	0.397091	3.36585	0.000763091	0.0602199	NANOGP1
ENSG00000170734	406.608	0.656486	0.195864	3.35175	0.000803024	0.06314	POLH
ENSG00000095321	531.32	0.704483	0.210784	3.34221	0.000831137	0.0647522	CRAT
ENSG00000138650	395.75	0.875508	0.261992	3.34174	0.000832545	0.0647522	PCDH10
ENSG00000143632	148.63	-2.71175	0.811171	-3.343	0.000828766	0.0647522	ACTA1
ENSG00000047662	30.6505	-1.66049	0.497617	-3.33688	0.00084725	0.0656588	FAM184B
ENSG00000249459	503.901	-0.599781	0.180106	-3.33016	0.000867969	0.0660761	ZNF286B
ENSG00000124092	258.271	0.868451	0.260642	3.33197	0.000862348	0.0660761	CTCFL
ENSG00000151962	156.014	3.38887	1.01738	3.33097	0.000865436	0.0660761	RBM46
ENSG00000266970	74.9051	1.09959	0.329896	3.33314	0.000858714	0.0660761	RP11-806H10.4
ENSG00000223784	13.3493	-3.00701	0.902583	-3.33156	0.000863593	0.0660761	LINP1
ENSG00000189060	2036.72	0.960202	0.289397	3.31794	0.000906847	0.0664881	H1F0
ENSG00000112667	799.156	0.578493	0.173968	3.32529	0.000883262	0.0664881	DNPH1
ENSG00000106688	733.138	-0.900014	0.271211	-3.3185	0.000905032	0.0664881	SLC1A1
ENSG00000132386	726.105	-0.593147	0.178463	-3.32365	0.000888475	0.0664881	SERPINF1
ENSG00000107262	710.986	-0.478549	0.144083	-3.32135	0.000895826	0.0664881	BAG1
ENSG00000122674	669.252	-0.669253	0.201426	-3.32257	0.000891917	0.0664881	CCZ1
ENSG00000133019	538.455	0.77106	0.232402	3.31779	0.00090733	0.0664881	CHRM3
ENSG00000111799	443.677	-1.15755	0.348695	-3.31967	0.000901249	0.0664881	COL12A1
ENSG00000279560	288.794	2.82848	0.851329	3.32243	0.000892385	0.0664881	AC007326.1
ENSG00000150636	89.9331	0.928417	0.279509	3.32161	0.000895008	0.0664881	CCDC102B
ENSG00000076344	25.2564	1.60529	0.483505	3.32011	0.000899805	0.0664881	RGS11
ENSG00000111305	12.5428	-2.17854	0.656981	-3.31598	0.000913216	0.0666926	GSG1
ENSG00000103037	1113.61	-0.559744	0.169031	-3.31148	0.00092804	0.0675463	SETD6
ENSG00000205363	323.187	-0.930037	0.281099	-3.30858	0.00093771	0.0675653	C15orf59
ENSG00000231952	15.7777	-1.83437	0.554318	-3.30923	0.000935525	0.0675653	DPY19L1P2
ENSG00000137959	7.8523	-4.71356	1.42424	-3.30953	0.000934541	0.0675653	IFI44L
ENSG00000099958	163.544	-0.854952	0.259143	-3.29915	0.000969786	0.0696435	DERL3
ENSG00000011332	252.162	-0.871531	0.264244	-3.29821	0.000973042	0.0696453	DPF1
ENSG00000106341	88.3689	-1.99249	0.604478	-3.29622	0.000979957	0.0698654	PPP1R17
ENSG00000196684	60.6383	0.917338	0.278364	3.29546	0.000982604	0.0698654	HSH2D
ENSG00000105784	49.623	-1.69536	0.515022	-3.29182	0.000995418	0.0705437	RUNDC3B
ENSG00000235590	665.32	-0.559118	0.169941	-3.29008	0.0010016	0.0707489	GNAS-AS1
ENSG00000235726	41.4489	1.55952	0.474252	3.28837	0.00100769	0.0709464	AC010148.1
ENSG00000134531	38.5624	-1.72581	0.52542	-3.28464	0.00102113	0.0711952	EMP1
ENSG00000268650	36.7639	1.35377	0.412074	3.28525	0.00101892	0.0711952	AC068499.10
ENSG00000260763	9.39852	2.55246	0.77694	3.28527	0.00101885	0.0711952	RP11-445O3.3
ENSG00000228278	93.2984	4.01249	1.22237	3.28256	0.00102868	0.0714901	ORM2
ENSG00000214244	51.2203	-1.29206	0.393801	-3.281	0.0010344	0.0716563	SETP21
ENSG00000259485	90.5055	1.35352	0.412716	3.27954	0.00103977	0.0717976	CTD-2147F2.1
ENSG00000155511	105.014	-1.17116	0.35721	-3.27862	0.00104317	0.0718021	GRIA1
ENSG00000172667	642.285	0.610491	0.18626	3.27762	0.00104685	0.071826	ZMAT3
ENSG00000110436	119.837	-0.90613	0.276621	-3.2757	0.00105399	0.0720862	SLC1A2
ENSG00000119684	1672.65	0.612258	0.186974	3.27457	0.00105823	0.0721472	MLH3
ENSG00000185344	2334.41	-0.464857	0.142083	-3.27173	0.00106892	0.0723904	ATP6V0A2
ENSG00000245205	440.432	-0.751087	0.229686	-3.27006	0.00107524	0.0723904	EEF1A1P4
ENSG00000122971	239.758	0.644874	0.197165	3.27072	0.00107273	0.0723904	ACADS
ENSG00000274993	58.649	0.940337	0.287447	3.27134	0.00107038	0.0723904	RP11-395B7.2
ENSG00000133316	2226.63	-0.453162	0.138717	-3.2668	0.00108771	0.0726654	WDR74
ENSG00000155792	223.001	1.13795	0.348385	3.26635	0.00108944	0.0726654	DEPTOR
ENSG00000176912	215.229	0.579889	0.177474	3.26745	0.0010852	0.0726654	TYMSOS
ENSG00000115738	1226.22	1.20438	0.369281	3.26141	0.00110859	0.0736972	ID2
ENSG00000169900	36.7681	1.61638	0.495731	3.2606	0.00111175	0.0736972	PYDC1
ENSG00000235152	231.118	-0.896363	0.275142	-3.25782	0.00112272	0.0739693	RP5-865N13.2
ENSG00000279483	126.365	0.768125	0.235776	3.25786	0.00112255	0.0739693	AC090498.1
ENSG00000204520	533.429	-0.608717	0.187235	-3.25108	0.00114967	0.0755135	MICA
ENSG00000130270	227.483	1.27491	0.392975	3.24425	0.0011776	0.0768797	ATP8B3
ENSG00000085514	24.1153	-1.33344	0.410955	-3.24473	0.00117561	0.0768797	PILRA
ENSG00000113389	28.493	1.92396	0.593658	3.24086	0.00119171	0.0773319	NPR3
ENSG00000249780	6.58687	3.22823	0.996046	3.24104	0.00119095	0.0773319	RP11-352E6.2
ENSG00000260518	10.1652	-3.25951	1.00647	-3.23856	0.00120135	0.0777234	BMS1P8
ENSG00000188177	1478.06	0.600082	0.185514	3.2347	0.00121772	0.078186	ZC3H6
ENSG00000214595	66.5432	-0.94615	0.292574	-3.23388	0.00122119	0.078186	EML6
ENSG00000257790	43.3844	-1.07744	0.333215	-3.23346	0.00122302	0.078186	EIF4A1P4
ENSG00000164845	38.8365	1.40032	0.432793	3.23555	0.00121408	0.078186	FAM86FP
ENSG00000184068	59.3127	1.01014	0.312628	3.23112	0.00123308	0.0785962	RP5-821D11.7
ENSG00000120693	69.3567	-0.92908	0.287793	-3.22829	0.00124532	0.0791424	SMAD9
ENSG00000124224	535.518	0.465182	0.144167	3.22668	0.00125234	0.0793538	PPP4R1L
ENSG00000115325	301.52	0.791549	0.245514	3.22405	0.00126391	0.0797422	DOK1
ENSG00000254837	209.033	0.709115	0.219976	3.22361	0.00126587	0.0797422	AP001372.2
ENSG00000188372	146.237	0.960932	0.298245	3.22196	0.00127318	0.079969	ZP3
ENSG00000227827	106.065	-1.55158	0.482232	-3.2175	0.00129314	0.0809865	RP11-958N24.2
ENSG00000162769	3521.66	-0.576002	0.179322	-3.21211	0.00131764	0.081225	FLVCR1
ENSG00000092853	2239.71	-0.60396	0.188067	-3.21141	0.00132087	0.081225	CLSPN
ENSG00000250312	1097.5	-0.72843	0.226864	-3.21087	0.00132334	0.081225	ZNF718
ENSG00000114646	116.999	-0.931681	0.289913	-3.21365	0.00131059	0.081225	CSPG5
ENSG00000240087	61.0158	-1.28302	0.399515	-3.21144	0.00132073	0.081225	RPSAP12
ENSG00000282458	31.509	-1.37821	0.429099	-3.21187	0.00131875	0.081225	WASH5P
ENSG00000214401	30.0658	-1.42315	0.443179	-3.21123	0.00132168	0.081225	KANSL1-AS1
ENSG00000120889	3932.98	0.462076	0.144011	3.20862	0.00133374	0.0816311	TNFRSF10B
ENSG00000233859	41.4074	-1.16307	0.362701	-3.20669	0.00134273	0.0819482	ADH5P4
ENSG00000176697	382.132	0.636795	0.198703	3.20475	0.00135178	0.0822675	BDNF
ENSG00000172247	128.451	0.796326	0.248552	3.20386	0.00135599	0.0822916	C1QTNF4
ENSG00000270977	33.1462	1.26686	0.395729	3.20134	0.0013679	0.082781	AC015849.16
ENSG00000052749	3091.89	-0.434744	0.135894	-3.19914	0.0013784	0.0831827	RRP12
ENSG00000261349	36.3547	1.1411	0.357154	3.195	0.00139833	0.0841496	RP3-465N24.5
ENSG00000281205	219.97	0.870396	0.272623	3.19268	0.00140961	0.0845921	LINC00950
ENSG00000162069	458.351	0.608052	0.190605	3.19011	0.00142218	0.0851095	BICDL2
ENSG00000113248	362.079	1.15472	0.362097	3.18897	0.00142779	0.0852084	PCDHB15
ENSG00000207340	241.931	-1.44787	0.454176	-3.18789	0.00143313	0.085249	RNVU1-1
ENSG00000258704	105.408	0.811941	0.254747	3.18724	0.00143638	0.085249	SRP54-AS1
ENSG00000280118	20.6345	2.46162	0.772926	3.18481	0.00144848	0.0857309	RP11-385H1.1
ENSG00000254951	39.5013	1.43308	0.45019	3.18328	0.00145615	0.0859485	RP11-494M8.4
ENSG00000136149	215.686	-0.791287	0.248733	-3.18127	0.00146629	0.0860792	RPL13AP25
ENSG00000203635	208.912	0.744709	0.234092	3.18126	0.00146635	0.0860792	AC144450.2
ENSG00000105173	1687.14	-0.524592	0.165022	-3.17893	0.00147821	0.0865395	CCNE1
ENSG00000197417	272.898	-0.601711	0.189328	-3.17814	0.00148225	0.0865412	SHPK
ENSG00000233006	63.3826	1.3716	0.431848	3.17613	0.00149256	0.0869074	AC034220.3
ENSG00000214199	248.324	-0.960538	0.30263	-3.17396	0.00150373	0.0873217	EEF1A1P12
ENSG00000130768	1375.45	-0.580989	0.183152	-3.17216	0.00151309	0.0874286	SMPDL3B
ENSG00000273295	45.8973	-1.30162	0.410341	-3.17205	0.00151369	0.0874286	AP000350.5
ENSG00000111644	59.5624	1.2575	0.396829	3.16888	0.00153028	0.0881506	ACRBP
ENSG00000170837	524.761	0.929831	0.294258	3.15992	0.00157815	0.0906656	GPR27
ENSG00000143878	834.58	0.930049	0.294588	3.15712	0.00159335	0.0910534	RHOB
ENSG00000115267	113.08	0.973939	0.308471	3.15731	0.00159232	0.0910534	IFIH1
ENSG00000253570	45.7359	-1.5165	0.480581	-3.15556	0.00160191	0.0913003	RNF5P1
ENSG00000157353	282.067	0.730793	0.231672	3.15443	0.00160809	0.0914111	FUK
ENSG00000114805	1747.63	-0.558591	0.177189	-3.15252	0.0016187	0.0917718	PLCH1
ENSG00000182534	1227.28	0.598571	0.190026	3.14995	0.00163299	0.0920974	MXRA7
ENSG00000118322	203.569	1.55385	0.493276	3.15007	0.00163233	0.0920974	ATP10B
ENSG00000006282	956.647	0.566672	0.18005	3.1473	0.00164784	0.0925663	SPATA20
ENSG00000116132	22.8291	-3.28477	1.0438	-3.14694	0.0016499	0.0925663	PRRX1
ENSG00000217555	24.6022	1.27607	0.405841	3.14425	0.00166511	0.0931771	CKLF
ENSG00000231991	19.0579	-1.69932	0.540912	-3.14157	0.00168043	0.0937907	ANXA2P2
ENSG00000015475	1089.88	-0.628251	0.200048	-3.1405	0.00168663	0.0938932	BID
ENSG00000276043	1853.98	-0.903397	0.288119	-3.1355	0.0017156	0.0952599	UHRF1
ENSG00000189283	90.4612	0.960211	0.30633	3.13456	0.00172111	0.0953205	FHIT
ENSG00000089248	3609.34	-0.412804	0.131783	-3.13245	0.00173353	0.0957619	ERP29
ENSG00000226465	6.34926	3.49442	1.11658	3.12958	0.00175058	0.0964566	RP13-401N8.1
ENSG00000249395	159.342	1.51799	0.485359	3.12755	0.00176269	0.0966297	CASC9
ENSG00000232320	8.51432	2.37051	0.757873	3.12784	0.00176096	0.0966297	AC009299.5
ENSG00000176171	1929.79	1.15653	0.370114	3.12478	0.00177938	0.0968046	BNIP3
ENSG00000176720	1271.84	-0.828437	0.265166	-3.12422	0.00178277	0.0968046	BOK
ENSG00000164070	592.717	0.8145	0.260591	3.12559	0.00177447	0.0968046	HSPA4L
ENSG00000184584	7.49733	-3.26716	1.04581	-3.12404	0.00178386	0.0968046	TMEM173
ENSG00000165215	568.363	1.07021	0.342701	3.12286	0.00179103	0.0969494	CLDN3
ENSG00000088305	43238.4	-0.533917	0.171184	-3.11895	0.00181494	0.0972663	DNMT3B
ENSG00000120708	613.465	-1.0432	0.334443	-3.11924	0.00181321	0.0972663	TGFBI
ENSG00000128274	352.54	1.00233	0.321316	3.11944	0.00181192	0.0972663	A4GALT
ENSG00000173947	211.65	0.727484	0.233114	3.12073	0.00180404	0.0972663	PIFO
ENSG00000165916	5520.05	-0.456534	0.146598	-3.11418	0.00184457	0.0986087	PSMC3
ENSG00000168496	2703.01	-0.476874	0.15338	-3.1091	0.00187657	0.0996651	FEN1
ENSG00000241484	187.835	0.822829	0.264708	3.10844	0.0018808	0.0996651	ARHGAP8
ENSG00000146001	30.8672	1.87442	0.602803	3.10951	0.00187401	0.0996651	PCDHB18P
ENSG00000197099	13.4016	-2.21019	0.711101	-3.10812	0.00188283	0.0996651	RP11-573D15.8
ENSG00000206932	46.624	1.34168	0.432024	3.10556	0.00189917	0.100283	RNU6-4P
ENSG00000270704	1089.76	0.800905	0.258458	3.09878	0.0019432	0.102358	RP11-701H24.5
ENSG00000080511	9.66325	2.58984	0.836616	3.09562	0.00196404	0.103203	RDH8
ENSG00000174343	133.195	-1.12858	0.365099	-3.09115	0.00199382	0.104033	CHRNA9
ENSG00000269388	25.279	1.19235	0.385741	3.09108	0.00199432	0.104033	AC018755.16
ENSG00000251152	13.5973	1.88198	0.608563	3.0925	0.0019848	0.104033	RP11-281P23.1
ENSG00000143149	2755.92	-0.474711	0.153923	-3.08409	0.00204175	0.104454	ALDH9A1
ENSG00000136938	982.327	0.573449	0.185793	3.0865	0.00202526	0.104454	ANP32B
ENSG00000143858	926.654	-0.822326	0.266372	-3.08713	0.00202099	0.104454	SYT2
ENSG00000146674	299.693	-0.968538	0.313898	-3.08552	0.00203196	0.104454	IGFBP3
ENSG00000214548	186.64	5.58974	1.81143	3.08582	0.00202994	0.104454	MEG3
ENSG00000140459	141.452	0.724861	0.23508	3.08347	0.00204602	0.104454	CYP11A1
ENSG00000226067	132.403	0.712873	0.231172	3.08374	0.00204416	0.104454	LINC00623
ENSG00000258815	51.0417	1.23309	0.399863	3.08379	0.00204384	0.104454	RP11-408B11.2
ENSG00000280913	42.647	1.12231	0.363918	3.08397	0.00204258	0.104454	CTSLP2
ENSG00000179528	8.90996	3.04143	0.98741	3.08021	0.00206853	0.105353	LBX2
ENSG00000165733	6171.18	-0.456578	0.148416	-3.07633	0.00209564	0.106007	BMS1
ENSG00000164124	255.319	0.666836	0.216768	3.07626	0.00209614	0.106007	TMEM144
ENSG00000265018	13.3696	-2.05468	0.667859	-3.07651	0.00209436	0.106007	AGAP12P
ENSG00000145675	865.156	0.587696	0.191207	3.07361	0.00211483	0.106681	PIK3R1
ENSG00000078319	329.055	0.504459	0.16416	3.07298	0.00211936	0.106681	PMS2P1
ENSG00000235508	40.9077	1.19984	0.390594	3.07184	0.00212744	0.106838	RPS2P7
ENSG00000274213	21.7472	1.33782	0.435655	3.07082	0.00213468	0.106953	RP11-670E13.6
ENSG00000172379	493.262	-0.614909	0.200499	-3.0669	0.00216294	0.107553	ARNT2
ENSG00000273079	427.192	-1.12898	0.368192	-3.06629	0.00216734	0.107553	GRIN2B
ENSG00000103174	269.697	-0.623646	0.203359	-3.06672	0.0021642	0.107553	NAGPA
ENSG00000229091	71.6075	-0.951386	0.310333	-3.0657	0.00217163	0.107553	HSPA8P8
ENSG00000274840	62.1194	1.50536	0.490733	3.06757	0.00215804	0.107553	RP11-320G10.1
ENSG00000113749	314.757	0.636683	0.207826	3.06354	0.00218739	0.107726	HRH2
ENSG00000184304	237.739	-0.616559	0.201327	-3.06248	0.00219512	0.107726	PRKD1
ENSG00000099822	60.887	1.22223	0.399051	3.06285	0.00219238	0.107726	HCN2
ENSG00000128917	18.8181	1.50099	0.489884	3.06398	0.00218416	0.107726	DLL4
ENSG00000023608	382.204	0.746304	0.243778	3.06141	0.00220298	0.107866	SNAPC1
ENSG00000256577	8.75754	-2.10556	0.688004	-3.06039	0.00221047	0.107987	RP11-283I3.2
ENSG00000217094	60.1632	-1.21741	0.398085	-3.05818	0.00222688	0.108543	PPIAP31
ENSG00000181404	131.276	0.741901	0.242691	3.05698	0.00223579	0.108731	WASH1
ENSG00000177694	55.9747	0.908979	0.29748	3.0556	0.00224614	0.108988	NAALADL2
ENSG00000164300	4837.52	0.716147	0.234925	3.04841	0.00230057	0.110458	SERINC5
ENSG00000134874	2234.26	-0.560199	0.18386	-3.04688	0.00231232	0.110458	DZIP1
ENSG00000170089	720.696	0.504339	0.165458	3.04814	0.0023026	0.110458	RP11-423H2.1
ENSG00000166415	520.885	1.17978	0.387054	3.04809	0.00230302	0.110458	WDR72
ENSG00000188290	98.3864	1.31661	0.432037	3.04746	0.00230785	0.110458	HES4
ENSG00000213244	95.8857	1.75131	0.574329	3.04932	0.00229364	0.110458	HIST2H3DP1
ENSG00000196109	39.1797	9.29442	3.04666	3.05069	0.00228318	0.110458	ZNF676
ENSG00000117877	1794.24	-0.508358	0.167105	-3.04214	0.00234903	0.111732	CD3EAP
ENSG00000263874	86.1872	-1.39744	0.459366	-3.0421	0.00234935	0.111732	LINC00672
ENSG00000156253	314.133	-0.975991	0.320966	-3.04079	0.00235959	0.111971	RWDD2B
ENSG00000163749	13.0566	1.86317	0.61365	3.03621	0.00239573	0.113436	CCDC158
ENSG00000251562	71129.6	1.01485	0.334618	3.03285	0.00242256	0.114455	MALAT1
ENSG00000225205	121.526	-0.980945	0.323575	-3.03159	0.00243272	0.114684	AC093818.1
ENSG00000152256	1349.02	-0.995825	0.328683	-3.02975	0.00244758	0.115132	PDK1
ENSG00000203727	6.76059	-2.77083	0.91486	-3.02869	0.00245615	0.115284	SAMD5
ENSG00000197444	1064.54	0.575476	0.190138	3.02662	0.00247305	0.115825	OGDHL
ENSG00000148680	2724.03	0.702368	0.232176	3.02515	0.00248506	0.115916	HTR7
ENSG00000071967	491.717	-0.955443	0.31591	-3.02442	0.00249113	0.115916	CYBRD1
ENSG00000259692	48.461	1.11386	0.36829	3.02442	0.00249113	0.115916	RP11-499F3.2
ENSG00000217648	23.2574	-1.4012	0.463711	-3.02171	0.00251349	0.116704	RP1-95L4.4
ENSG00000234171	545.281	-0.558568	0.185074	-3.01807	0.00254386	0.11786	RNASEH1-AS1
ENSG00000023892	435.853	0.568251	0.188511	3.01442	0.00257475	0.11792	DEF6
ENSG00000137501	374.817	-1.15075	0.381799	-3.01403	0.002578	0.11792	SYTL2
ENSG00000163040	330.361	-0.615892	0.204196	-3.01619	0.00255975	0.11792	CCDC74A
ENSG00000254876	163.685	0.606218	0.201081	3.0148	0.00257151	0.11792	RP11-23J9.5
ENSG00000167799	104.395	0.673669	0.223496	3.01423	0.00257629	0.11792	NUDT8
ENSG00000167754	77.8074	-0.985296	0.326775	-3.01521	0.00256801	0.11792	KLK5
ENSG00000164649	6960.35	-0.348054	0.115556	-3.01198	0.00259549	0.117969	CDCA7L
ENSG00000092345	118.425	1.09787	0.364471	3.01222	0.00259341	0.117969	DAZL
ENSG00000158560	103.671	0.97738	0.324494	3.01201	0.00259523	0.117969	DYNC1I1
ENSG00000259775	19.3023	1.53245	0.509562	3.00739	0.002635	0.119512	RP11-45P15.4
ENSG00000154134	341.889	0.570753	0.18992	3.00522	0.00265385	0.120115	ROBO3
ENSG00000159648	35.0295	-1.16556	0.387992	-3.00407	0.00266394	0.120319	TEPP
ENSG00000115241	8722.25	-0.423181	0.140965	-3.00202	0.00268192	0.120877	PPM1G
ENSG00000173825	58.9735	0.875693	0.291847	3.00051	0.00269524	0.121224	TIGD3
ENSG00000002746	323.483	-0.517346	0.172611	-2.99718	0.00272491	0.122303	HECW1
ENSG00000168310	744.582	0.567525	0.189505	2.99477	0.00274648	0.123015	IRF2
ENSG00000269343	2542.81	-0.586757	0.196009	-2.99353	0.00275773	0.123262	ZNF587B
ENSG00000136450	14317.4	-0.445922	0.149117	-2.99041	0.002786	0.124012	SRSF1
ENSG00000140478	46.1786	1.45257	0.485696	2.99069	0.00278345	0.124012	GOLGA6D
ENSG00000171793	3073.84	-0.455839	0.152534	-2.98844	0.00280406	0.124302	CTPS1
ENSG00000065621	620.102	0.5426	0.181542	2.98885	0.00280034	0.124302	GSTO2
ENSG00000198712	10993.7	0.871839	0.292145	2.98427	0.00284255	0.125235	MT-CO2
ENSG00000272055	33.5118	1.49739	0.501739	2.98441	0.00284127	0.125235	RNU6-6P
ENSG00000119147	32.5778	-1.21876	0.408299	-2.98498	0.00283599	0.125235	C2orf40
ENSG00000263013	83.9933	-0.785121	0.263161	-2.98342	0.00285047	0.125328	RP11-876N24.5
ENSG00000158163	369.897	-0.599075	0.200853	-2.98266	0.00285754	0.125383	DZIP1L
ENSG00000085840	3239.2	-0.396203	0.132953	-2.98002	0.00288231	0.125912	ORC1
ENSG00000070010	1711.56	-0.360174	0.120909	-2.97888	0.00289305	0.125912	UFD1L
ENSG00000167632	647.847	0.612633	0.205607	2.97964	0.00288589	0.125912	TRAPPC9
ENSG00000133110	212.079	-3.76431	1.26417	-2.97771	0.00290414	0.125912	POSTN
ENSG00000267470	40.7481	1.1845	0.397722	2.97821	0.00289942	0.125912	ZNF571-AS1
ENSG00000228252	36.4113	-1.8287	0.614143	-2.97765	0.00290466	0.125912	COL6A4P2
ENSG00000075391	3211.32	-0.34596	0.116248	-2.97606	0.0029198	0.126313	RASAL2
ENSG00000072201	330.736	0.912931	0.30715	2.97226	0.00295615	0.127375	LNX1
ENSG00000087085	59.6811	0.833533	0.280406	2.9726	0.00295293	0.127375	ACHE
ENSG00000128342	193.924	0.651413	0.219485	2.96791	0.0029983	0.128933	LIF
ENSG00000263535	67.251	1.77223	0.597341	2.96686	0.00300855	0.129116	AK4P1
ENSG00000167721	6244.57	-0.48928	0.165018	-2.965	0.00302681	0.129384	TSR1
ENSG00000204839	45.7572	1.02963	0.347222	2.96532	0.00302368	0.129384	MROH6
ENSG00000011007	2471.61	-0.431413	0.145785	-2.95924	0.00308394	0.129823	TCEB3
ENSG00000117395	2208.14	-0.686536	0.231853	-2.96108	0.00306563	0.129823	EBNA1BP2
ENSG00000151640	642.943	-0.697174	0.23541	-2.96153	0.00306111	0.129823	DPYSL4
ENSG00000168918	469.065	0.566983	0.191738	2.95706	0.00310583	0.129823	INPP5D
ENSG00000197355	265.972	1.43791	0.485413	2.96224	0.00305412	0.129823	UAP1L1
ENSG00000104892	122.37	0.640368	0.216497	2.95785	0.0030979	0.129823	KLC3
ENSG00000186047	110.175	-0.795894	0.26894	-2.95937	0.00308269	0.129823	DLEU7
ENSG00000166311	83.4825	1.15072	0.38891	2.95883	0.00308808	0.129823	SMPD1
ENSG00000178458	66.468	-0.861823	0.291248	-2.95906	0.00308575	0.129823	H3F3AP6
ENSG00000227986	55.214	1.84059	0.622324	2.9576	0.00310042	0.129823	TRIM60P18
ENSG00000256356	42.1302	-1.19624	0.404012	-2.96091	0.00306735	0.129823	HSPA8P5
ENSG00000214842	21.7538	1.41772	0.479493	2.95671	0.0031094	0.129823	RAD51AP2
ENSG00000261135	20.6396	1.4769	0.499668	2.95575	0.00311908	0.129976	RP4-798A10.7
ENSG00000174021	1301.08	0.431655	0.146118	2.95415	0.00313528	0.13001	GNG5
ENSG00000092094	1191.13	-0.371923	0.12591	-2.95388	0.00313801	0.13001	OSGEP
ENSG00000171574	146.822	-0.994104	0.336508	-2.95418	0.00313504	0.13001	ZNF584
ENSG00000185298	1113.61	-0.496399	0.168109	-2.95284	0.0031487	0.130053	CCDC137
ENSG00000182957	957.058	-0.69916	0.236795	-2.9526	0.00315111	0.130053	SPATA13
ENSG00000133315	582.936	0.538457	0.182426	2.95165	0.00316077	0.130202	MACROD1
ENSG00000142303	454.375	-0.701879	0.237874	-2.95063	0.00317125	0.130213	ADAMTS10
ENSG00000274602	417.174	1.21833	0.412932	2.95045	0.00317314	0.130213	PI4KAP1
ENSG00000247626	1615.86	0.431474	0.146348	2.94828	0.00319543	0.130879	MARS2
ENSG00000174989	1234.22	0.561369	0.190558	2.94593	0.00321987	0.131622	FBXW8
ENSG00000214144	40.1476	-1.17604	0.399287	-2.94536	0.0032258	0.131622	RP11-488L18.1
ENSG00000224039	26.4529	1.54899	0.526231	2.94356	0.00324464	0.131891	AC091493.1
ENSG00000273481	8.98547	2.29932	0.781008	2.94405	0.0032395	0.131891	RP11-126K1.9
ENSG00000162817	731.867	0.505542	0.171897	2.94095	0.00327205	0.13241	C1orf115
ENSG00000142694	437.031	0.800067	0.272019	2.94121	0.00326928	0.13241	EVA1B
ENSG00000245904	54.8466	0.91057	0.309656	2.94059	0.00327592	0.13241	RP11-796E2.4
ENSG00000264175	10.1127	2.04039	0.694006	2.94001	0.00328198	0.13241	MIR3189
ENSG00000198467	4317.34	-0.586133	0.19949	-2.93815	0.00330175	0.132513	TPM2
ENSG00000265972	994.794	2.40946	0.82009	2.93804	0.00330299	0.132513	TXNIP
ENSG00000274026	28.5479	1.24738	0.424556	2.93807	0.00330261	0.132513	FAM27E3
ENSG00000247363	29.9447	1.11109	0.378493	2.93555	0.00332957	0.133316	RP11-637A17.2
ENSG00000163612	11.0677	2.04613	0.697253	2.93455	0.00334027	0.133316	FAM86KP
ENSG00000248854	6.98355	-3.54403	1.20774	-2.93443	0.00334157	0.133316	HNRNPH1P3
ENSG00000106565	15.6555	-1.75255	0.597532	-2.93299	0.00335714	0.13369	TMEM176B
ENSG00000229893	11.2362	1.74177	0.594004	2.93226	0.00336507	0.133758	AC004549.6
ENSG00000141655	358.758	-1.18945	0.406016	-2.92957	0.00339426	0.13467	TNFRSF11A
ENSG00000240005	12.6923	1.64936	0.563182	2.92864	0.00340452	0.134829	RP11-293A21.1
ENSG00000168389	686.591	-0.666676	0.227797	-2.92663	0.00342661	0.134979	MFSD2A
ENSG00000134330	345.078	0.62917	0.21493	2.92733	0.00341891	0.134979	IAH1
ENSG00000223401	18.7771	1.6019	0.547406	2.92634	0.00342977	0.134979	RP11-211G3.2
ENSG00000262714	7.59253	2.65788	0.908362	2.92601	0.00343336	0.134979	RP11-44F14.8
ENSG00000165914	944.697	0.451131	0.154328	2.92319	0.00346465	0.135467	TTC7B
ENSG00000188732	931.51	0.755011	0.25827	2.92334	0.00346297	0.135467	FAM221A
ENSG00000268649	125.299	-1.01676	0.347819	-2.92325	0.00346398	0.135467	MIR296
ENSG00000164045	3917.28	-0.471419	0.161428	-2.92031	0.00349682	0.136052	CDC25A
ENSG00000128908	1990.67	-0.498267	0.170625	-2.92025	0.00349748	0.136052	INO80
ENSG00000179344	333.046	3.04561	1.0431	2.91977	0.00350284	0.136052	HLA-DQB1
ENSG00000131187	102.25	0.985191	0.337441	2.9196	0.00350486	0.136052	F12
ENSG00000261578	90.352	-0.833723	0.285623	-2.91896	0.00351198	0.136083	RP11-21L23.2
ENSG00000189223	182.565	-4.67317	1.60234	-2.91647	0.00354018	0.136929	PAX8-AS1
ENSG00000100242	637.643	0.717955	0.246282	2.91518	0.00355489	0.137252	SUN2
ENSG00000132773	420.735	-0.671793	0.230503	-2.91447	0.00356292	0.137316	TOE1
ENSG00000164733	1712.71	0.693623	0.238331	2.91033	0.00361051	0.137429	CTSB
ENSG00000258289	433.106	-0.751908	0.258251	-2.91154	0.00359651	0.137429	CHURC1
ENSG00000178078	308.6	-0.655594	0.225246	-2.91057	0.00360772	0.137429	STAP2
ENSG00000204172	150.65	0.926415	0.318284	2.91066	0.00360668	0.137429	AGAP9
ENSG00000226243	112.254	-0.978311	0.335864	-2.91282	0.00358184	0.137429	RPL37AP1
ENSG00000151320	63.6995	0.869506	0.298622	2.91173	0.00359438	0.137429	AKAP6
ENSG00000279048	32.4932	1.16608	0.400301	2.91302	0.00357953	0.137429	RP11-511H23.2
ENSG00000225465	30.8071	-1.34155	0.461416	-2.90746	0.00364374	0.138449	RFPL1S
ENSG00000242516	177.342	0.83636	0.287724	2.90681	0.00365135	0.138494	LINC00960
ENSG00000259917	40.4084	-0.990848	0.341058	-2.90522	0.00366996	0.138956	HNRNPLP2
ENSG00000248708	8.93038	2.65346	0.91355	2.90456	0.00367772	0.139005	CTD-2316B1.2
ENSG00000174243	5694.18	-0.382131	0.131672	-2.90214	0.00370625	0.139593	DDX23
ENSG00000225554	9.14598	2.02512	0.697677	2.90266	0.00370014	0.139593	RP11-527D7.1
ENSG00000137310	699.085	-0.481147	0.165831	-2.90143	0.00371467	0.139642	TCF19
ENSG00000145428	311.477	-0.524007	0.180668	-2.90039	0.00372699	0.139642	RNF175
ENSG00000228218	51.5125	-1.02726	0.354154	-2.90061	0.00372435	0.139642	ATF4P3
ENSG00000183023	262.534	-0.957848	0.330552	-2.89773	0.00375877	0.140409	SLC8A1
ENSG00000269994	98.1575	1.18034	0.407353	2.89758	0.00376048	0.140409	RP11-276H19.2
ENSG00000221890	185.799	0.809818	0.279683	2.89548	0.00378575	0.140751	NPTXR
ENSG00000160201	122.176	-0.680371	0.235	-2.89519	0.00378926	0.140751	U2AF1
ENSG00000215866	59.6308	0.89716	0.30986	2.89537	0.00378707	0.140751	LINC01356
ENSG00000054277	955.15	-0.450385	0.155636	-2.89383	0.00380577	0.140879	OPN3
ENSG00000196371	327.417	-0.463783	0.160256	-2.89401	0.0038036	0.140879	FUT4
ENSG00000105401	5698.48	-0.430109	0.148695	-2.89256	0.00382113	0.141026	CDC37
ENSG00000266680	60.579	0.788356	0.272559	2.89242	0.00382283	0.141026	RP5-1148A21.3
ENSG00000041802	2928.49	-0.444554	0.153784	-2.89076	0.00384315	0.141533	LSG1
ENSG00000181143	66.2188	-0.977434	0.338189	-2.8902	0.00385001	0.141544	MUC16
ENSG00000207442	1910.15	1.00734	0.348797	2.88804	0.00387654	0.141553	SNORD116-6
ENSG00000131203	1404.4	-0.928409	0.321405	-2.88859	0.00386969	0.141553	IDO1
ENSG00000168824	952.508	-0.886086	0.306806	-2.8881	0.00387574	0.141553	NSG1
ENSG00000170161	72.8692	-0.892965	0.309142	-2.88853	0.00387048	0.141553	RP11-262H14.4
ENSG00000175311	7.25085	3.78618	1.31229	2.88516	0.00391211	0.142369	ANKS4B
ENSG00000229178	6.42944	3.09693	1.07339	2.88519	0.00391181	0.142369	AC069513.4
ENSG00000170043	308.097	0.573549	0.198831	2.88461	0.00391904	0.142381	TRAPPC1
ENSG00000197467	145.351	-0.814081	0.28228	-2.88394	0.0039273	0.142441	COL13A1
ENSG00000260455	53.6728	0.942323	0.327216	2.87982	0.00397901	0.144073	NBAT1
ENSG00000087076	361.783	1.13036	0.39259	2.87925	0.00398626	0.144094	HSD17B14
ENSG00000111261	168.04	0.599198	0.208264	2.87711	0.0040133	0.144828	MANSC1
ENSG00000226314	89.1133	0.849301	0.29556	2.87353	0.00405908	0.146235	ZNF192P1
ENSG00000249264	600.818	-0.646998	0.225305	-2.87165	0.0040833	0.146374	EEF1A1P9
ENSG00000140398	244.058	0.681295	0.23723	2.87188	0.00408042	0.146374	NEIL1
ENSG00000014257	60.4133	-1.04003	0.362153	-2.8718	0.00408138	0.146374	ACPP
ENSG00000196584	2258.67	-0.698257	0.243344	-2.86942	0.00411226	0.147167	XRCC2
ENSG00000144136	3425.78	-0.475791	0.165962	-2.86686	0.0041457	0.147385	SLC20A1
ENSG00000110799	73.2489	0.719673	0.251012	2.86708	0.00414278	0.147385	VWF
ENSG00000116663	26.475	1.27958	0.446114	2.86828	0.00412711	0.147385	FBXO6
ENSG00000275966	19.1792	1.66523	0.580686	2.8677	0.00413464	0.147385	RP11-1055B8.9
ENSG00000183439	42.504	0.955459	0.333727	2.863	0.00419657	0.148947	TRIM61
ENSG00000179715	89.9165	0.647588	0.226241	2.86238	0.00420478	0.148993	PCED1B
ENSG00000112118	18000.1	-0.405128	0.141626	-2.86054	0.00422926	0.149198	MCM3
ENSG00000067369	5949.97	-0.538253	0.188162	-2.86058	0.0042287	0.149198	TP53BP1
ENSG00000159388	435.78	0.835732	0.292176	2.86037	0.00423151	0.149198	BTG2
ENSG00000134201	82.1049	-1.03606	0.362283	-2.8598	0.00423902	0.149198	GSTM5
ENSG00000274225	10.0832	-2.07223	0.724724	-2.85934	0.00424519	0.149198	KB-68A7.1
ENSG00000185272	197.07	0.707454	0.247474	2.8587	0.00425381	0.149257	RBM11
ENSG00000149485	8051.76	-0.448974	0.157367	-2.85303	0.0043304	0.15087	FADS1
ENSG00000100462	4602.36	-0.402167	0.140967	-2.85291	0.00433213	0.15087	PRMT5
ENSG00000182670	3290.48	0.616238	0.216018	2.85271	0.00433478	0.15087	TTC3
ENSG00000185565	397.753	-0.536787	0.188094	-2.85383	0.00431958	0.15087	LSAMP
ENSG00000128422	14.0255	-2.65678	0.930796	-2.85431	0.00431299	0.15087	KRT17
ENSG00000100285	140.096	-0.841738	0.295306	-2.85039	0.00436658	0.151731	NEFH
ENSG00000166446	301.364	-0.516807	0.181473	-2.84785	0.00440158	0.152159	CDYL2
ENSG00000214248	99.331	0.741946	0.2605	2.84816	0.00439722	0.152159	CTD-3193O13.12
ENSG00000216937	85.3308	0.911772	0.320207	2.84745	0.00440714	0.152159	CCDC7
ENSG00000103089	45.2348	1.73131	0.607915	2.84795	0.00440013	0.152159	FA2H
ENSG00000169894	123.623	0.88041	0.309447	2.84511	0.00443964	0.153036	MUC3A
ENSG00000082516	3627.46	-0.439517	0.154558	-2.8437	0.00445935	0.153232	GEMIN5
ENSG00000207507	84.0696	1.49512	0.525771	2.84368	0.00445954	0.153232	RNU6-9
ENSG00000214796	600.371	-0.512773	0.180479	-2.84117	0.00449477	0.153646	RP11-480I12.5
ENSG00000221955	456.192	-0.455638	0.160383	-2.84094	0.00449805	0.153646	SLC12A8
ENSG00000184702	376.472	0.951723	0.33502	2.8408	0.00450011	0.153646	SEPT5
ENSG00000183160	12.6859	-1.88132	0.661915	-2.84225	0.00447968	0.153646	TMEM119
ENSG00000279050	287.145	1.10381	0.388811	2.83894	0.00452635	0.154297	PWAR1
ENSG00000165091	16.8696	-2.22008	0.782263	-2.83803	0.0045393	0.154494	TMC1
ENSG00000007171	114.532	-0.791795	0.279107	-2.83689	0.00455556	0.154602	NOS2
ENSG00000241556	56.6876	-1.92712	0.679329	-2.8368	0.00455684	0.154602	RP11-490G8.1
ENSG00000146592	130.338	0.730067	0.257507	2.83513	0.00458065	0.155166	CREB5
ENSG00000054179	33.1336	1.20972	0.426991	2.83312	0.00460963	0.155658	ENTPD2
ENSG00000218502	27.07	-1.42617	0.50335	-2.83336	0.00460621	0.155658	H2AFZP3
ENSG00000254946	70.7446	-1.38889	0.490385	-2.83225	0.00462212	0.155836	RP11-531H8.1
ENSG00000138074	3721.74	-0.470319	0.166088	-2.83175	0.00462941	0.155838	SLC5A6
ENSG00000162576	262.309	-0.936132	0.330647	-2.83121	0.00463721	0.155857	MXRA8
ENSG00000186439	231.347	-3.31595	1.17167	-2.83011	0.00465313	0.155905	TRDN
ENSG00000225556	23.8774	1.20457	0.425611	2.83021	0.00465169	0.155905	C2CD4D
ENSG00000204347	322.573	-1.37851	0.48739	-2.82834	0.00467898	0.156452	BTBD17
ENSG00000255367	54.0853	0.938758	0.331951	2.828	0.00468397	0.156452	RP13-726E6.2
ENSG00000183431	6976.01	-0.418717	0.148237	-2.82465	0.00473323	0.157365	SF3A3
ENSG00000172572	644.021	-0.661088	0.233968	-2.82555	0.0047199	0.157365	PDE3A
ENSG00000139915	58.0274	1.31022	0.463819	2.82486	0.00473016	0.157365	MDGA2
ENSG00000111684	1165.06	-0.5696	0.201808	-2.82249	0.00476527	0.158187	LPCAT3
ENSG00000178163	2692.77	0.379216	0.134543	2.81854	0.00482432	0.159771	ZNF518B
ENSG00000131470	534.633	-0.463487	0.164499	-2.81757	0.00483892	0.159771	PSMC3IP
ENSG00000123700	125.295	0.818527	0.290502	2.81763	0.00483788	0.159771	KCNJ2
ENSG00000231742	33.3821	1.13437	0.402641	2.81732	0.00484267	0.159771	LINC01273
ENSG00000231680	6.33492	-2.88473	1.02455	-2.81562	0.00486838	0.160374	AP003774.6
ENSG00000196353	109.426	0.61527	0.218584	2.8148	0.00488081	0.160538	CPNE4
ENSG00000094804	3754.33	-0.590666	0.210085	-2.81156	0.00493025	0.161424	CDC6
ENSG00000213062	94.9403	0.691924	0.2461	2.81156	0.00493019	0.161424	RP1-206D15.6
ENSG00000166183	93.9539	0.937362	0.333356	2.8119	0.00492504	0.161424	ASPG
ENSG00000107968	502.98	1.32729	0.472219	2.81076	0.00494248	0.161579	MAP3K8
ENSG00000197461	2648.21	1.1845	0.421583	2.80965	0.0049595	0.16189	PDGFA
ENSG00000138764	812.353	0.716913	0.255314	2.80796	0.00498559	0.162173	CCNG2
ENSG00000105327	709.801	0.830488	0.295797	2.80763	0.00499074	0.162173	BBC3
ENSG00000277149	303.788	-1.15252	0.410405	-2.80824	0.00498124	0.162173	TYW1B
ENSG00000236008	37.2898	0.956133	0.340854	2.80511	0.0050299	0.163199	AC011747.4
ENSG00000171311	1275.35	-0.441813	0.157651	-2.80247	0.00507125	0.164046	EXOSC1
ENSG00000188596	8.39956	-2.1277	0.759137	-2.80278	0.00506638	0.164046	CFAP54
ENSG00000141682	5769.2	0.881237	0.31469	2.80034	0.00510495	0.164471	PMAIP1
ENSG00000136111	3655.7	-0.343439	0.122689	-2.79927	0.00512182	0.164471	TBC1D4
ENSG00000176092	513.135	-0.485505	0.173465	-2.79886	0.00512831	0.164471	AIM1L
ENSG00000228288	68.4751	0.835511	0.298497	2.79906	0.0051252	0.164471	PCAT6
ENSG00000267284	65.7076	0.887189	0.316774	2.8007	0.00509913	0.164471	RP11-397A16.1
ENSG00000234949	26.7941	1.4495	0.51791	2.79874	0.00513018	0.164471	AC104667.3
ENSG00000186577	206.118	0.772584	0.276149	2.79771	0.00514659	0.164752	C6orf1
ENSG00000166736	409.879	-0.71876	0.257139	-2.79522	0.00518651	0.165293	HTR3A
ENSG00000213777	38.0852	0.989452	0.353871	2.79608	0.00517265	0.165293	CTD-2224J9.8
ENSG00000278861	20.2309	1.33897	0.47898	2.79545	0.0051827	0.165293	RP11-338K17.6
ENSG00000218739	2372.89	0.870522	0.311649	2.79327	0.00521777	0.165478	CEBPZOS
ENSG00000010165	2187.8	-0.323979	0.115999	-2.79295	0.00522304	0.165478	METTL13
ENSG00000168952	390.518	-0.649377	0.232475	-2.79332	0.00521703	0.165478	STXBP6
ENSG00000150722	57.1744	1.2972	0.464352	2.79358	0.00521283	0.165478	PPP1R1C
ENSG00000174099	47.6743	-1.00225	0.35908	-2.79116	0.0052519	0.166148	MSRB3
ENSG00000225489	51.6168	1.63203	0.58528	2.78845	0.00529607	0.167055	RP11-390F4.3
ENSG00000251129	6.46444	3.15375	1.13085	2.78882	0.00528996	0.167055	RP11-734I18.1
ENSG00000078699	705.271	0.69946	0.250968	2.78705	0.00531905	0.167535	CBFA2T2
ENSG00000162734	1271.08	-0.435817	0.156457	-2.78554	0.00534389	0.167996	PEA15
ENSG00000170577	32.4851	1.67608	0.601777	2.78521	0.00534929	0.167996	SIX2
ENSG00000135763	2426.5	-0.472543	0.169811	-2.78276	0.00538985	0.168554	URB2
ENSG00000165156	202.757	-0.996742	0.35819	-2.78272	0.00539054	0.168554	ZHX1
ENSG00000144227	75.4504	-0.982694	0.353072	-2.78327	0.00538142	0.168554	NXPH2
ENSG00000187957	108.03	-0.766504	0.275575	-2.78147	0.00541127	0.16873	DNER
ENSG00000107147	8.61925	-2.23684	0.804202	-2.78144	0.00541184	0.16873	KCNT1
ENSG00000150764	1518.5	-0.389985	0.140242	-2.78081	0.00542237	0.168814	DIXDC1
ENSG00000184156	190	-0.729067	0.262327	-2.77923	0.00544873	0.16939	KCNQ3
ENSG00000107959	1849.32	0.456472	0.164382	2.77689	0.0054882	0.170372	PITRM1
ENSG00000144649	250.615	-0.598051	0.215459	-2.7757	0.00550829	0.170749	FAM198A
ENSG00000033011	1023.45	-0.54837	0.197684	-2.77397	0.00553764	0.171412	ALG1
ENSG00000105464	403.246	0.632511	0.22825	2.77113	0.00558625	0.172623	GRIN2D
ENSG00000224861	261.257	-0.815214	0.294271	-2.77028	0.0056008	0.172623	YBX1P1
ENSG00000069399	26.6646	1.2734	0.459647	2.77039	0.00559885	0.172623	BCL3
ENSG00000159212	47.1742	0.998389	0.360606	2.76864	0.00562906	0.173061	CLIC6
ENSG00000232536	19.0446	1.64923	0.595707	2.76852	0.00563108	0.173061	RP11-74C1.4
ENSG00000116133	19880.2	-0.547947	0.198058	-2.7666	0.00566446	0.173388	DHCR24
ENSG00000177082	760.86	-0.551207	0.199185	-2.76731	0.00565203	0.173388	WDR73
ENSG00000215612	14.2275	1.92388	0.695417	2.76652	0.00566584	0.173388	HMX1
ENSG00000188002	310.925	0.490064	0.177224	2.76523	0.00568833	0.173829	RP11-43F13.1
ENSG00000166796	10.1798	-2.36446	0.855642	-2.76338	0.00572063	0.174568	LDHC
ENSG00000266094	87.8067	-0.862802	0.312531	-2.76069	0.00576799	0.175765	RASSF5
ENSG00000253683	54.4124	-0.941821	0.341371	-2.75894	0.00579899	0.17646	CTB-79E8.3
ENSG00000100162	639.374	-0.459134	0.166477	-2.75794	0.00581667	0.176748	CENPM
ENSG00000154240	179.195	0.670455	0.243433	2.75417	0.00588413	0.178342	CEP112
ENSG00000136826	154.446	1.04683	0.380108	2.75404	0.00588647	0.178342	KLF4
ENSG00000242100	24.2415	-1.54522	0.56116	-2.75362	0.00589397	0.178342	RPL9P32
ENSG00000230438	11.992	1.67546	0.608611	2.75292	0.00590668	0.178476	SERPINB9P1
ENSG00000135829	20068	-0.44524	0.161783	-2.75208	0.00592181	0.178651	DHX9
ENSG00000135205	50.7553	1.0292	0.374027	2.75168	0.00592906	0.178651	CCDC146
ENSG00000172336	1358.48	-0.431665	0.156957	-2.75021	0.00595565	0.178718	POP7
ENSG00000277196	295.383	1.32979	0.483583	2.74988	0.00596176	0.178718	AC007325.2
ENSG00000125510	56.7719	1.00853	0.366773	2.74973	0.00596446	0.178718	OPRL1
ENSG00000213943	16.3062	-1.36965	0.497972	-2.75046	0.0059512	0.178718	KRT18P17
ENSG00000180425	170.383	0.690823	0.251375	2.74818	0.00599278	0.179246	C11orf71
ENSG00000153531	30.3163	-1.06556	0.387778	-2.74785	0.00599872	0.179246	ADPRHL1
ENSG00000204710	13.8224	1.72299	0.627347	2.74646	0.00602416	0.179757	SPDYC
ENSG00000235920	13.0231	-1.46892	0.535109	-2.74509	0.00604949	0.180263	AC073109.2
ENSG00000178568	218.8	0.878038	0.320002	2.74385	0.00607227	0.180692	ERBB4
ENSG00000204209	3019.04	-0.369339	0.134668	-2.7426	0.00609552	0.180884	DAXX
ENSG00000151572	122.602	-0.884742	0.32256	-2.74288	0.0060903	0.180884	ANO4
ENSG00000120725	309.374	0.501444	0.182939	2.74104	0.00612448	0.181244	SIL1
ENSG00000254682	259.237	-0.785308	0.28648	-2.74124	0.00612086	0.181244	RP11-660L16.2
ENSG00000188042	1294.04	0.420506	0.153462	2.74013	0.00614158	0.181501	ARL4C
ENSG00000153446	71.7195	-1.21841	0.444888	-2.7387	0.00616833	0.182042	C16orf89
ENSG00000267547	41.4106	1.03638	0.378661	2.73696	0.00620098	0.182755	RP11-686D22.4
ENSG00000073111	9752.3	-0.369867	0.135162	-2.73648	0.00621007	0.182773	MCM2
ENSG00000158816	78.5541	-1.16513	0.42591	-2.73562	0.00622624	0.182865	VWA5B1
ENSG00000164669	7.55381	-2.78216	1.01709	-2.73541	0.00623019	0.182865	INTS4P1
ENSG00000196510	2533.59	-0.379126	0.13864	-2.73461	0.00624537	0.183062	ANAPC7
ENSG00000278259	4847.77	-0.32253	0.117964	-2.73415	0.00625422	0.183072	MYO19
ENSG00000233971	15.0684	-1.61347	0.590224	-2.73366	0.00626347	0.183094	RPS20P10
ENSG00000092850	40.855	0.867525	0.317483	2.73251	0.00628541	0.183486	TEKT2
ENSG00000132518	21.9432	1.34322	0.491715	2.73169	0.00630095	0.183691	GUCY2D
ENSG00000270168	18.63	-1.31085	0.479991	-2.73098	0.00631467	0.183842	LA16c-380H5.3
ENSG00000196586	2560.48	0.709931	0.26	2.7305	0.00632376	0.183858	MYO6
ENSG00000100664	8487.34	-0.829498	0.303856	-2.7299	0.00633527	0.183945	EIF5
ENSG00000166743	12.0259	-2.27206	0.832529	-2.72911	0.00635063	0.184143	ACSM1
ENSG00000255282	22.4436	1.71318	0.627901	2.72842	0.00636387	0.184279	WTAPP1
ENSG00000214252	19.4251	1.5956	0.585018	2.72744	0.00638285	0.18458	AZGP1P2
ENSG00000109084	3872.45	-0.411696	0.151032	-2.72589	0.00641281	0.185099	TMEM97
ENSG00000185133	283.205	0.602473	0.22104	2.72563	0.00641797	0.185099	INPP5J
ENSG00000260464	10.3354	1.82854	0.671136	2.72454	0.00643916	0.185462	RP4-561L24.3
ENSG00000247092	470.264	-0.406615	0.149295	-2.72358	0.0064579	0.185533	SNHG10
ENSG00000224729	176.607	0.614863	0.22576	2.72353	0.00645886	0.185533	PCOLCE-AS1
ENSG00000164309	129.089	0.96888	0.35592	2.72219	0.00648515	0.18604	CMYA5
ENSG00000171314	9375.13	-0.431327	0.158516	-2.72104	0.00650774	0.18644	PGAM1
ENSG00000116062	18565.4	-0.430256	0.158188	-2.7199	0.00653022	0.186823	MSH6
ENSG00000269837	429.572	-0.641277	0.235888	-2.71857	0.00655651	0.186823	IPO5P1
ENSG00000197933	270.381	0.520612	0.191531	2.71817	0.00656447	0.186823	ZNF823
ENSG00000228502	267.775	-0.59043	0.217191	-2.71848	0.00655825	0.186823	EEF1A1P11
ENSG00000228265	64.3347	0.777388	0.285877	2.71931	0.00654192	0.186823	RALY-AS1
ENSG00000196696	81.0713	-0.819164	0.301479	-2.71715	0.00658473	0.187152	PDXDC2P
ENSG00000137880	508.314	0.416392	0.153322	2.71581	0.00661143	0.187663	GCHFR
ENSG00000157554	199.999	1.19425	0.440023	2.71406	0.00664645	0.188409	ERG
ENSG00000156471	3524.67	-0.370956	0.136725	-2.71316	0.00666454	0.188674	PTDSS1
ENSG00000173531	114.957	0.761328	0.280661	2.71262	0.00667529	0.18873	MST1
ENSG00000116793	1466.46	-0.530473	0.195674	-2.711	0.00670807	0.188842	PHTF1
ENSG00000125457	478.697	0.512048	0.18886	2.71125	0.00670293	0.188842	MIF4GD
ENSG00000269404	61.7844	-1.14039	0.420702	-2.71069	0.00671431	0.188842	SPIB
ENSG00000242970	21.0535	-1.34378	0.495513	-2.71189	0.00668998	0.188842	AC068522.4
ENSG00000049656	3073.64	-0.375744	0.138661	-2.70979	0.00673248	0.189106	CLPTM1L
ENSG00000161204	1318.64	-0.415792	0.153533	-2.70816	0.00676576	0.189381	ABCF3
ENSG00000076706	684.745	-0.501717	0.185318	-2.70733	0.00678278	0.189381	MCAM
ENSG00000079156	564.66	-0.511147	0.188798	-2.70737	0.00678183	0.189381	OSBPL6
ENSG00000065320	145.887	0.789676	0.291699	2.70716	0.00678622	0.189381	NTN1
ENSG00000251079	12.8418	1.65921	0.612835	2.70743	0.00678062	0.189381	BMS1P2
ENSG00000182541	1728.07	-0.38652	0.142845	-2.70586	0.00681273	0.189385	LIMK2
ENSG00000110148	199.836	-0.99549	0.367851	-2.70623	0.00680521	0.189385	CCKBR
ENSG00000255621	14.799	1.47297	0.544238	2.70649	0.00679992	0.189385	RP11-377D9.3
ENSG00000173401	46.7359	-2.26186	0.836631	-2.70354	0.00686053	0.190468	GLIPR1L1
ENSG00000272906	31.8215	1.02472	0.3791	2.70302	0.00687122	0.19052	RP11-533E19.7
ENSG00000116717	508.521	0.550051	0.203585	2.70182	0.00689602	0.190716	GADD45A
ENSG00000200879	51.6076	-0.925243	0.342428	-2.70201	0.00689218	0.190716	SNORD14E
ENSG00000046889	4464.51	-0.461544	0.170945	-2.69997	0.00693464	0.191538	PREX2
ENSG00000163449	178.138	-0.608616	0.225469	-2.69933	0.00694796	0.191661	TMEM169
ENSG00000075461	127.259	-0.678876	0.251658	-2.69761	0.00698382	0.192158	CACNG4
ENSG00000230313	21.6238	1.53412	0.568651	2.69783	0.00697927	0.192158	HCG24
ENSG00000197728	8744.7	-0.645619	0.23945	-2.69626	0.00701228	0.192378	RPS26
ENSG00000149328	361.725	-0.592876	0.219849	-2.69675	0.00700204	0.192378	GLB1L2
ENSG00000251495	77.2187	-1.02835	0.381442	-2.69596	0.0070186	0.192378	PPIAP11
ENSG00000243449	160.783	0.791338	0.293607	2.69523	0.00703399	0.192411	C4orf48
ENSG00000224059	9.39557	-1.85745	0.689205	-2.69506	0.00703768	0.192411	HSPA8P16
ENSG00000134256	44.4312	-0.970114	0.360139	-2.69372	0.00706586	0.192937	CD101
ENSG00000198093	5488.3	0.798755	0.29678	2.69141	0.00711512	0.194036	ZNF649
ENSG00000103550	6030.53	-0.414453	0.154061	-2.69018	0.00714128	0.194285	KNOP1
ENSG00000139289	2571.61	0.900297	0.334666	2.69014	0.0071423	0.194285	PHLDA1
ENSG00000134107	111.375	0.974517	0.362798	2.68611	0.00722885	0.196083	BHLHE40
ENSG00000278875	101.587	1.15316	0.42939	2.68558	0.00724048	0.196083	CTC-439O9.1
ENSG00000176681	28.6603	-1.23577	0.460183	-2.68538	0.00724479	0.196083	LRRC37A
ENSG00000177301	21.5446	-1.31413	0.489241	-2.68606	0.00723006	0.196083	KCNA2
ENSG00000005187	365.196	0.809493	0.301509	2.68481	0.00725712	0.19617	ACSM3
ENSG00000184887	340.877	-0.739585	0.275612	-2.68343	0.00728722	0.196737	BTBD6
ENSG00000269889	21.1144	1.13322	0.422403	2.6828	0.00730089	0.196859	RP11-816J6.3
ENSG00000183960	350.117	0.562186	0.209724	2.6806	0.00734914	0.196928	KCNH8
ENSG00000273136	267.013	0.611375	0.228046	2.68093	0.00734183	0.196928	NBPF26
ENSG00000250616	134.103	-2.76974	1.03272	-2.68199	0.00731867	0.196928	RP11-455F5.3
ENSG00000100033	61.0526	1.5192	0.566515	2.68167	0.00732559	0.196928	PRODH
ENSG00000128683	33	1.49016	0.5559	2.68062	0.00734863	0.196928	GAD1
ENSG00000208037	15.638	1.42578	0.532987	2.67508	0.00747113	0.199948	MIR320A
ENSG00000198899	1871.34	0.423958	0.158655	2.67219	0.00753576	0.201221	MT-ATP6
ENSG00000262001	1039.73	0.702879	0.263098	2.67154	0.00755031	0.201221	DLGAP1-AS2
ENSG00000130307	415.79	0.541857	0.202929	2.67017	0.00758121	0.201221	USHBP1
ENSG00000090932	380.568	0.656292	0.245716	2.67093	0.00756408	0.201221	DLL3
ENSG00000132967	372.652	-1.15981	0.434379	-2.67005	0.00758408	0.201221	HMGB1P5
ENSG00000171224	272.338	0.491677	0.18412	2.67041	0.00757583	0.201221	C10orf35
ENSG00000270605	83.28	-0.802428	0.300324	-2.67187	0.00754295	0.201221	RP5-1092A3.4
ENSG00000178636	15.0806	1.63151	0.611242	2.66917	0.00760385	0.201469	RP11-455G16.1
ENSG00000254852	9.10641	1.9918	0.746326	2.66881	0.00761214	0.201469	NPIPA2
ENSG00000085511	4191.05	-0.331547	0.124451	-2.66408	0.00771996	0.203845	MAP3K4
ENSG00000110721	2173.74	-0.358014	0.134414	-2.66352	0.00773277	0.203845	CHKA
ENSG00000102931	750.311	0.42782	0.160632	2.66336	0.00773638	0.203845	ARL2BP
ENSG00000256546	287.489	0.512283	0.192355	2.66322	0.00773974	0.203845	AC156455.1
ENSG00000175928	6884.02	-0.382298	0.143579	-2.66263	0.00775335	0.203954	LRRN1
ENSG00000235706	199.752	0.71844	0.270095	2.65996	0.00781509	0.205327	DICER1-AS1
ENSG00000226807	8.80597	2.07389	0.779941	2.65904	0.00783645	0.205638	MROH5
ENSG00000230267	6.1091	-3.67751	1.38352	-2.65807	0.00785886	0.205975	HERC2P4
ENSG00000117151	217.469	0.763275	0.287286	2.65685	0.00788754	0.206475	CTBS
ENSG00000142871	729.35	0.474153	0.178504	2.65626	0.00790125	0.206499	CYR61
ENSG00000206262	255.802	-0.630463	0.2374	-2.6557	0.00791435	0.206499	FOXL2NB
ENSG00000198108	119.54	-0.766627	0.288685	-2.65558	0.00791721	0.206499	CHSY3
ENSG00000226792	597.28	-0.848286	0.319694	-2.65343	0.00796791	0.20732	LINC00371
ENSG00000169548	23.5914	-1.64777	0.62092	-2.65376	0.00796015	0.20732	ZNF280A
ENSG00000188738	248.725	1.27678	0.481376	2.65235	0.00799328	0.207729	FSIP2
ENSG00000168259	3660.87	-0.306493	0.115581	-2.65176	0.00800739	0.207845	DNAJC7
ENSG00000229191	893.918	-0.770493	0.290659	-2.65085	0.00802886	0.208075	RP11-168O16.1
ENSG00000166573	33.0874	1.19883	0.452292	2.65057	0.00803556	0.208075	GALR1
ENSG00000130204	3855.7	-0.497006	0.187603	-2.64925	0.00806711	0.208279	TOMM40
ENSG00000120594	3174.95	-0.500277	0.188893	-2.64847	0.00808568	0.208279	PLXDC2
ENSG00000138640	1676.35	-0.384754	0.14525	-2.64891	0.00807522	0.208279	FAM13A
ENSG00000163235	184.668	-0.929873	0.351128	-2.64825	0.00809108	0.208279	TGFA
ENSG00000243517	113.392	-0.845301	0.319227	-2.64796	0.00809781	0.208279	RP11-627K11.1
ENSG00000270882	96.6498	-1.06995	0.404089	-2.64781	0.00810147	0.208279	HIST2H4A
ENSG00000235750	883.668	-0.454371	0.171711	-2.64614	0.00814155	0.20906	KIAA0040
ENSG00000212978	289.362	0.519589	0.196399	2.64557	0.00815533	0.209165	AC016747.3
ENSG00000092201	18060.1	-0.424953	0.160713	-2.64417	0.00818916	0.209783	SUPT16H
ENSG00000122870	99.435	-1.01252	0.383137	-2.64271	0.00822445	0.210436	BICC1
ENSG00000213465	1989.37	0.427588	0.161902	2.64103	0.00826532	0.210732	ARL2
ENSG00000189410	449.103	-0.596588	0.225855	-2.64146	0.00825493	0.210732	SH2D5
ENSG00000253706	51.7927	1.29053	0.488639	2.64107	0.00826437	0.210732	RP11-758M4.4
ENSG00000103227	229.24	0.843164	0.319306	2.64061	0.00827557	0.210743	LMF1
ENSG00000226666	40.457	-1.01507	0.384533	-2.63974	0.00829706	0.210792	HSPA9P1
ENSG00000274428	37.7006	1.12999	0.428028	2.64	0.00829061	0.210792	U1
ENSG00000214772	6.22789	-2.43001	0.921696	-2.63646	0.00837769	0.21259	RP11-174G6.1
ENSG00000037474	4190.05	-0.459281	0.174238	-2.63593	0.00839065	0.212668	NSUN2
ENSG00000132749	1025.88	0.532308	0.202154	2.63317	0.0084591	0.213776	TESMIN
ENSG00000227268	56.2307	0.82252	0.312373	2.63313	0.00846013	0.213776	KLLN
ENSG00000214878	8.81472	-1.95457	0.742344	-2.63297	0.00846413	0.213776	RPL5P31
ENSG00000183742	3484.75	0.645575	0.245263	2.63217	0.00848402	0.213974	MACC1
ENSG00000151388	1684.71	-0.376028	0.142875	-2.63186	0.00849182	0.213974	ADAMTS12
ENSG00000090661	3048.63	0.619213	0.235542	2.62889	0.00856653	0.214824	CERS4
ENSG00000105618	2887.55	-0.343517	0.130676	-2.62877	0.00856952	0.214824	PRPF31
ENSG00000275464	428.526	-0.472798	0.179872	-2.62853	0.0085754	0.214824	CH507-9B2.5
ENSG00000215808	39.6116	-1.8189	0.69188	-2.62892	0.00856559	0.214824	LINC01139
ENSG00000253583	7.08488	2.21674	0.843322	2.62858	0.00857423	0.214824	RP11-573J24.1
ENSG00000168875	12.3056	2.5641	0.97602	2.6271	0.00861168	0.215482	SOX14
ENSG00000270460	10.0667	1.92266	0.732635	2.62431	0.00868243	0.217	RP11-796E10.1
ENSG00000140854	1925.55	-0.495923	0.189077	-2.62287	0.00871932	0.217627	KATNB1
ENSG00000264164	191.397	0.58375	0.222589	2.62254	0.0087277	0.217627	RP11-640N20.6
ENSG00000116157	422.007	0.556134	0.212396	2.61838	0.00883486	0.219537	GPX7
ENSG00000276141	23.5355	1.09385	0.417746	2.61845	0.00883298	0.219537	WHAMMP3
ENSG00000006659	14.934	1.57515	0.601504	2.61868	0.00882714	0.219537	LGALS14
ENSG00000157916	1926.55	-0.347424	0.132781	-2.61651	0.0088833	0.219792	RER1
ENSG00000105088	1899.02	0.581332	0.22218	2.61649	0.00888386	0.219792	OLFM2
ENSG00000141485	41.3908	-1.01388	0.387357	-2.61742	0.00885968	0.219792	SLC13A5
ENSG00000254610	25.1392	1.50971	0.577068	2.61617	0.00889211	0.219792	RP5-903G2.2
ENSG00000267606	24.4894	1.11455	0.426048	2.61602	0.00889615	0.219792	AC006116.21
ENSG00000280234	8.69771	2.09861	0.80239	2.61546	0.00891085	0.219903	RP11-145P16.2
ENSG00000132780	22890.3	-0.464783	0.177836	-2.61354	0.00896092	0.220633	NASP
ENSG00000132522	53.2512	-0.834677	0.319351	-2.61367	0.0089576	0.220633	GPS2
ENSG00000236439	37.4364	-0.848573	0.324853	-2.61217	0.00899691	0.221266	RP11-175B9.3
ENSG00000260290	85.5112	-0.711267	0.272439	-2.61074	0.00903456	0.221939	CTD-2033A16.2
ENSG00000160214	1914.64	-0.371985	0.142528	-2.6099	0.00905674	0.22223	RRP1
ENSG00000261175	135.622	-0.959434	0.367736	-2.60903	0.00907994	0.222293	CTD-2015G9.2
ENSG00000143882	38.1683	1.18471	0.454078	2.60905	0.00907947	0.222293	ATP6V1C2
ENSG00000250182	928.596	-0.68461	0.262549	-2.60755	0.00911928	0.223003	EEF1A1P13
ENSG00000177479	5528.02	-0.315439	0.120994	-2.60706	0.00913224	0.223067	ARIH2
ENSG00000177459	55.5298	-0.773696	0.296914	-2.60579	0.00916623	0.223644	ERICH5
ENSG00000165028	23.02	1.11534	0.428246	2.60443	0.00920267	0.224279	NIPSNAP3B
ENSG00000204959	150.12	-1.12135	0.430649	-2.60385	0.00921827	0.224405	ARHGEF34P
ENSG00000108375	250.499	0.980769	0.376892	2.60225	0.00926137	0.2252	RNF43
ENSG00000178878	89.2949	0.693485	0.26681	2.59917	0.00934494	0.22672	APOLD1
ENSG00000246876	14.3369	1.5662	0.602543	2.59932	0.00934089	0.22672	RP11-519M16.1
ENSG00000173451	455.859	0.660963	0.254416	2.59796	0.00937782	0.227262	THAP2
ENSG00000160200	1594.22	0.574839	0.221513	2.59505	0.00945764	0.227753	CBS
ENSG00000176485	1439.86	1.10653	0.426266	2.59586	0.00943543	0.227753	PLA2G16
ENSG00000204388	1192.58	0.574372	0.221283	2.59564	0.00944148	0.227753	HSPA1B
ENSG00000095932	131.712	0.659357	0.254046	2.59542	0.00944748	0.227753	SMIM24
ENSG00000165810	18.4531	-1.43131	0.551584	-2.59491	0.00946151	0.227753	BTNL9
ENSG00000108405	7.16318	-3.20978	1.23692	-2.59497	0.00945995	0.227753	P2RX1
ENSG00000146038	45.7057	1.30902	0.504797	2.59316	0.00950993	0.228663	DCDC2
ENSG00000123500	7.40128	-4.09017	1.57754	-2.59275	0.0095212	0.228679	COL10A1
ENSG00000140937	578.066	-0.740766	0.286007	-2.59003	0.00959683	0.230239	CDH11
ENSG00000136158	1855.31	0.661063	0.255375	2.5886	0.0096368	0.23094	SPRY2
ENSG00000187372	72.7183	1.12555	0.434977	2.5876	0.00966463	0.23135	PCDHB13
ENSG00000081803	2025.81	0.702894	0.271823	2.58585	0.00971384	0.23183	CADPS2
ENSG00000137628	545.196	0.945513	0.365664	2.58574	0.00971698	0.23183	DDX60
ENSG00000118194	207.003	-0.790747	0.305773	-2.58606	0.00970809	0.23183	TNNT2
ENSG00000077514	2102.53	-0.488147	0.189172	-2.58044	0.0098675	0.234425	POLD3
ENSG00000225077	224.586	0.682399	0.264457	2.58038	0.00986928	0.234425	LINC00337
ENSG00000204588	25.9912	1.24033	0.480618	2.5807	0.00985988	0.234425	LINC01123
ENSG00000163746	23.2833	1.56384	0.605866	2.58116	0.00984698	0.234425	PLSCR2
ENSG00000234742	63.0102	-1.00313	0.388881	-2.57953	0.00989347	0.234741	AC144530.1
ENSG00000227097	84.5788	-0.766142	0.297104	-2.5787	0.00991732	0.234887	RPS28P7
ENSG00000182584	35.4845	0.930185	0.360739	2.57856	0.00992143	0.234887	ACTL10
ENSG00000141232	570.246	0.508984	0.197587	2.576	0.00999514	0.236113	TOB1
ENSG00000186994	129.357	0.621469	0.241249	2.57605	0.00999352	0.236113	KANK3
ENSG00000188856	30.2129	1.04686	0.406713	2.57397	0.010054	0.237243	RPSAP47
ENSG00000132510	95.8899	1.30288	0.50644	2.57262	0.0100931	0.237647	KDM6B
ENSG00000123095	93.2041	1.62014	0.629747	2.57268	0.0100914	0.237647	BHLHE41
ENSG00000206965	14.5528	1.40732	0.547182	2.57194	0.010113	0.237854	RNU6-5P
ENSG00000215571	7.88595	-1.89914	0.739046	-2.56972	0.010178	0.239122	GRK6P1
ENSG00000228038	71.061	-0.977657	0.380701	-2.56805	0.0102274	0.239629	VN1R51P
ENSG00000164129	69.8418	0.868857	0.338359	2.56786	0.0102329	0.239629	NPY5R
ENSG00000251468	30.115	-1.24104	0.48327	-2.56802	0.0102282	0.239629	RP11-369K16.1
ENSG00000204592	1707.35	0.507802	0.197798	2.56728	0.0102501	0.239769	HLA-E
ENSG00000000457	466.602	-0.37292	0.145284	-2.56684	0.0102631	0.239813	SCYL3
ENSG00000148834	1197.21	0.663711	0.25874	2.56516	0.0103127	0.239944	GSTO1
ENSG00000268225	142.708	0.727687	0.283711	2.56489	0.0103209	0.239944	CTD-2331H12.5
ENSG00000266904	92.9986	0.76706	0.298982	2.56557	0.0103007	0.239944	CTC-559E9.1
ENSG00000105550	25.2584	1.30295	0.50802	2.56477	0.0103244	0.239944	FGF21
ENSG00000112175	11.998	2.23713	0.871943	2.56569	0.0102971	0.239944	BMP5
ENSG00000167528	789.287	-0.354319	0.138175	-2.56427	0.0103394	0.240034	ZNF641
ENSG00000139874	42.9005	1.21947	0.475745	2.56328	0.0103689	0.240459	SSTR1
ENSG00000158711	1840.01	0.514667	0.200891	2.56193	0.0104094	0.241139	ELK4
ENSG00000237037	64.2165	0.853987	0.333541	2.56037	0.0104561	0.241961	NDUFA6-AS1
ENSG00000232389	33.426	-1.00329	0.391948	-2.55976	0.0104746	0.242129	RP11-134K13.2
ENSG00000105509	44.1391	1.28264	0.501169	2.55929	0.0104887	0.242195	HAS1
ENSG00000230658	56.722	-0.932132	0.364269	-2.55891	0.0105	0.242198	KLHL7-AS1
ENSG00000127415	81.2079	0.751682	0.293874	2.55784	0.0105324	0.242602	IDUA
ENSG00000232391	10.75	-1.92129	0.75121	-2.55759	0.0105401	0.242602	RANP2
ENSG00000179761	846.853	-0.574523	0.224678	-2.55709	0.0105551	0.242688	PIPOX
ENSG00000162783	1182.02	0.51707	0.202373	2.55503	0.0106178	0.243869	IER5
ENSG00000166349	136.353	0.743719	0.29122	2.5538	0.0106554	0.243953	RAG1
ENSG00000120262	8.20216	1.86107	0.728652	2.55412	0.0106456	0.243953	CCDC170
ENSG00000241582	5.9262	2.99404	1.17237	2.55385	0.010654	0.243953	RPL23AP8
ENSG00000101210	491.245	0.695308	0.272344	2.55305	0.0106785	0.244222	EEF1A2
ENSG00000200169	538.016	-2.71149	1.06229	-2.5525	0.0106952	0.244345	RNU5D-1
ENSG00000128581	366.098	-0.53757	0.210724	-2.55106	0.0107394	0.245096	IFT22
ENSG00000140988	47878.9	0.47663	0.186956	2.54942	0.0107901	0.245213	RPS2
ENSG00000250899	696.951	-0.542499	0.21278	-2.54957	0.0107854	0.245213	RP11-253E3.3
ENSG00000160460	138.437	0.771307	0.302441	2.55027	0.0107639	0.245213	SPTBN4
ENSG00000182379	23.8372	1.61691	0.634104	2.54991	0.0107751	0.245213	NXPH4
ENSG00000170921	567.114	-0.760112	0.298423	-2.5471	0.0108623	0.246075	TANC2
ENSG00000112539	28.46	-1.30748	0.513303	-2.5472	0.0108591	0.246075	C6orf118
ENSG00000250227	11.5211	1.60793	0.631145	2.54764	0.0108454	0.246075	TRIM60P14
ENSG00000104611	251.477	-0.602961	0.236847	-2.54578	0.0109034	0.246487	SH2D4A
ENSG00000189280	12.097	-1.89415	0.743993	-2.54592	0.010899	0.246487	GJB5
ENSG00000166450	1383.44	0.73008	0.287034	2.54353	0.0109739	0.247823	PRTG
ENSG00000140022	1875.54	-0.559552	0.220024	-2.54314	0.0109861	0.247838	STON2
ENSG00000093144	1358.16	0.760651	0.299503	2.53972	0.0110943	0.249991	ECHDC1
ENSG00000261557	184.97	-0.88419	0.348191	-2.53938	0.0111048	0.249991	EEF1A1P38
ENSG00000115993	1063.04	-0.620532	0.244442	-2.53857	0.0111307	0.250016	TRAK2
ENSG00000103196	382.873	0.557361	0.219585	2.53825	0.0111407	0.250016	CRISPLD2
ENSG00000168309	49.7043	0.819647	0.322851	2.53878	0.011124	0.250016	FAM107A
ENSG00000227057	2229.96	-0.401878	0.158357	-2.5378	0.0111552	0.250081	WDR46
ENSG00000235480	7.36471	1.81457	0.715303	2.53678	0.0111877	0.250548	RP11-363D14.1
ENSG00000272927	15.1423	1.34654	0.530883	2.53641	0.0111995	0.250553	RP11-1191J2.5
ENSG00000281016	16.007	2.75954	1.08838	2.53546	0.01123	0.250973	RP11-2H3.7
ENSG00000163629	9805.37	-0.456949	0.180327	-2.534	0.0112769	0.251614	PTPN13
ENSG00000128591	663.924	-0.862486	0.340484	-2.53312	0.0113053	0.251614	FLNC
ENSG00000245552	60.2367	0.809569	0.319571	2.5333	0.0112994	0.251614	RP11-712B9.2
ENSG00000233558	33.7999	-1.15185	0.45464	-2.53354	0.0112918	0.251614	RP3-486I3.4
ENSG00000235423	72.5932	-0.855641	0.338121	-2.53058	0.0113875	0.25318	RP11-282O18.3
ENSG00000183688	1489.62	0.475181	0.187871	2.52929	0.0114294	0.25385	RFLNB
ENSG00000261553	30.942	-1.02139	0.403918	-2.5287	0.0114485	0.254013	RP11-29G8.3
ENSG00000226690	7.09913	2.0978	0.829962	2.52759	0.0114848	0.254557	AC005281.1
ENSG00000258986	83.4517	0.95569	0.378484	2.52505	0.0115683	0.256143	TMEM179
ENSG00000154175	6.18829	-2.2903	0.907833	-2.52283	0.0116416	0.257502	ABI3BP
ENSG00000198231	4532.88	-0.382649	0.151717	-2.52213	0.0116646	0.257653	DDX42
ENSG00000237054	25.6348	1.10885	0.439688	2.5219	0.0116724	0.257653	PRMT5-AS1
ENSG00000109787	1631.91	0.400887	0.158989	2.52147	0.0116864	0.257699	KLF3
ENSG00000131504	3672.26	-0.425006	0.168681	-2.51958	0.0117495	0.25777	DIAPH1
ENSG00000171345	3253.53	-0.440737	0.174911	-2.51977	0.0117431	0.25777	KRT19
ENSG00000139154	1856.84	0.605875	0.240364	2.52066	0.0117135	0.25777	AEBP2
ENSG00000158220	303.803	-0.423494	0.168068	-2.51978	0.0117428	0.25777	ESYT3
ENSG00000230593	10.6864	-1.89713	0.752754	-2.52025	0.011727	0.25777	AC090804.1
ENSG00000237440	837.111	0.55148	0.219024	2.5179	0.0118057	0.258272	ZNF737
ENSG00000230383	101.912	-0.831363	0.330128	-2.5183	0.0117922	0.258272	AC009245.3
ENSG00000235026	48.2932	-0.75355	0.299329	-2.51746	0.0118203	0.258272	DPP10-AS1
ENSG00000164404	22.8877	1.16126	0.461262	2.51758	0.0118164	0.258272	GDF9
ENSG00000227403	62.2526	1.02218	0.40626	2.51609	0.0118666	0.259022	AC009299.3
ENSG00000118960	846.793	0.713411	0.283594	2.51561	0.0118828	0.259113	HS1BP3
ENSG00000012048	2468.06	-0.459906	0.183024	-2.51282	0.011977	0.260639	BRCA1
ENSG00000186973	20.188	1.20214	0.478334	2.51318	0.011965	0.260639	FAM183A
ENSG00000100077	3436.99	-0.310496	0.123593	-2.51225	0.0119965	0.260799	GRK3
ENSG00000139998	2150.22	-0.543868	0.21653	-2.51175	0.0120134	0.260904	RAB15
ENSG00000155465	204.495	-0.538945	0.214637	-2.51096	0.0120404	0.261228	SLC7A7
ENSG00000159176	1331.88	-0.70951	0.282679	-2.50995	0.0120749	0.261711	CSRP1
ENSG00000110628	170.164	0.845946	0.337189	2.50882	0.0121136	0.262067	SLC22A18
ENSG00000180347	11.7919	-1.556	0.620227	-2.50876	0.0121156	0.262067	CCDC129
ENSG00000149782	4417.68	-0.535276	0.213398	-2.50834	0.0121299	0.262094	PLCB3
ENSG00000144468	1018.51	0.422463	0.168445	2.50801	0.0121412	0.262094	RHBDD1
ENSG00000137494	204.916	-0.431146	0.171957	-2.50729	0.0121659	0.262366	ANKRD42
ENSG00000167861	376.454	0.852598	0.340231	2.50594	0.0122125	0.263107	HID1
ENSG00000197785	1758.13	-0.377011	0.150548	-2.50426	0.0122707	0.264097	ATAD3A
ENSG00000168411	6031.29	-0.385228	0.153932	-2.50258	0.0123293	0.26502	RFWD3
ENSG00000266714	400.579	0.816542	0.326341	2.50211	0.0123455	0.26502	MYO15B
ENSG00000223502	8.97848	1.79449	0.71723	2.50197	0.0123506	0.26502	RP11-96B5.3
ENSG00000279070	11.9916	1.39932	0.559575	2.50069	0.0123951	0.265712	RP11-287D1.2
ENSG00000163902	10547.2	-0.362987	0.145217	-2.49963	0.0124324	0.266246	RPN1
ENSG00000186141	1023.33	-0.437782	0.175206	-2.49868	0.0124658	0.266576	POLR3C
ENSG00000068903	389.225	0.514509	0.205928	2.49848	0.0124725	0.266576	SIRT2
ENSG00000164056	1574.11	0.719181	0.288528	2.49259	0.0126817	0.267026	SPRY1
ENSG00000063854	739.278	0.453314	0.181886	2.4923	0.0126919	0.267026	HAGH
ENSG00000155729	346.721	0.401703	0.161094	2.4936	0.0126455	0.267026	KCTD18
ENSG00000166997	307.605	-0.450619	0.180647	-2.49447	0.0126146	0.267026	CNPY4
ENSG00000267508	294.977	0.638112	0.255999	2.49263	0.0126799	0.267026	ZNF285
ENSG00000166676	121.653	0.576343	0.23093	2.49574	0.0125693	0.267026	TVP23A
ENSG00000157703	106.292	0.756873	0.303416	2.49451	0.0126132	0.267026	SVOPL
ENSG00000140675	94.6832	1.13156	0.453199	2.49682	0.0125312	0.267026	SLC5A2
ENSG00000244280	94.3494	1.37625	0.551118	2.49719	0.0125181	0.267026	ECEL1P2
ENSG00000213862	56.767	-0.981295	0.39369	-2.49256	0.0126827	0.267026	CTD-2270N23.1
ENSG00000234352	43.3499	0.961478	0.3856	2.49346	0.0126506	0.267026	AC009264.1
ENSG00000224789	32.6721	1.44803	0.580417	2.49481	0.0126024	0.267026	AC012363.4
ENSG00000234985	11.1172	-1.67461	0.671107	-2.49529	0.0125853	0.267026	RP11-3L10.3
ENSG00000276282	9.74707	1.84473	0.739691	2.49393	0.0126339	0.267026	RP11-210K20.5
ENSG00000234998	7.89969	2.04168	0.818216	2.49529	0.0125856	0.267026	RP11-439A17.10
ENSG00000269938	7.36447	2.46889	0.98898	2.4964	0.0125462	0.267026	RP11-214K3.20
ENSG00000210100	172.203	0.932792	0.374324	2.49193	0.012705	0.26704	MT-TI
ENSG00000125966	936.152	1.02883	0.413173	2.49006	0.0127721	0.26819	MMP24
ENSG00000169750	2203.31	-0.416557	0.167357	-2.48904	0.012809	0.268702	RAC3
ENSG00000261599	6.96143	-4.12825	1.65953	-2.4876	0.0128607	0.269524	HERC2P8
ENSG00000204237	785.285	-0.419925	0.169045	-2.4841	0.012988	0.270351	OXLD1
ENSG00000104419	243.365	0.859324	0.345773	2.48522	0.012947	0.270351	NDRG1
ENSG00000086967	193.925	-0.852366	0.343118	-2.48418	0.0129852	0.270351	MYBPC2
ENSG00000145692	58.1309	-1.191	0.479105	-2.48588	0.0129231	0.270351	BHMT
ENSG00000215374	36.2299	1.05751	0.425704	2.48415	0.012986	0.270351	FAM66B
ENSG00000255040	11.8753	-1.43504	0.577342	-2.48559	0.0129335	0.270351	RP11-677N16.1
ENSG00000233061	7.90064	-1.8865	0.759387	-2.48425	0.0129826	0.270351	TTLL7-IT1
ENSG00000279207	470.924	-0.645544	0.259955	-2.48329	0.0130175	0.270684	RP11-159D12.8
ENSG00000151490	62.8167	-0.957455	0.385662	-2.48263	0.0130417	0.270684	PTPRO
ENSG00000216031	42.0766	-0.982751	0.395814	-2.48286	0.0130332	0.270684	MIR298
ENSG00000213949	479.546	-0.730743	0.294775	-2.47898	0.0131758	0.273204	ITGA1
ENSG00000142657	15793	-0.295667	0.119351	-2.4773	0.0132382	0.27397	PGD
ENSG00000186710	28.7681	-1.32111	0.533217	-2.47762	0.0132262	0.27397	CFAP73
ENSG00000113369	2106.05	0.849643	0.343111	2.47629	0.0132755	0.274216	ARRDC3
ENSG00000104808	67.5783	0.903115	0.364666	2.47655	0.0132659	0.274216	DHDH
ENSG00000175197	256.365	1.20449	0.48664	2.47512	0.0133193	0.274584	DDIT3
ENSG00000227347	63.1641	-0.814317	0.329045	-2.47479	0.0133315	0.274584	HNRNPKP2
ENSG00000224846	11.3755	1.78157	0.719881	2.47481	0.0133305	0.274584	RP1-90J20.8
ENSG00000198355	1814.84	0.675947	0.273204	2.47415	0.0133553	0.274811	PIM3
ENSG00000134262	373.638	-0.505076	0.204265	-2.47265	0.0134114	0.275701	AP4B1
ENSG00000272686	294.52	0.80224	0.324631	2.47124	0.0134645	0.27653	RP11-390E23.6
ENSG00000160818	1593.19	-0.445193	0.180279	-2.46947	0.0135313	0.276595	GPATCH4
ENSG00000198763	1017.99	0.521684	0.211284	2.46912	0.0135447	0.276595	MT-ND2
ENSG00000135063	325.084	0.523138	0.211794	2.47003	0.0135103	0.276595	FAM189A2
ENSG00000169129	308.447	-0.674515	0.273162	-2.46928	0.0135384	0.276595	AFAP1L2
ENSG00000226085	98.0181	-0.578249	0.23416	-2.46946	0.0135317	0.276595	UQCRFS1P1
ENSG00000267711	12.2515	1.65585	0.670242	2.47053	0.0134913	0.276595	RP11-686D22.5
ENSG00000153187	40888.4	-0.350191	0.141915	-2.46761	0.0136019	0.276769	HNRNPU
ENSG00000141741	504.715	0.508104	0.205902	2.4677	0.0135985	0.276769	MIEN1
ENSG00000154027	353.688	-0.551979	0.223696	-2.46754	0.0136046	0.276769	AK5
ENSG00000180764	50.0481	-0.868078	0.351788	-2.46762	0.0136015	0.276769	PIPSL
ENSG00000280316	41.9996	0.898795	0.364361	2.46677	0.0136338	0.2771	AL365181.1
ENSG00000241644	59.0121	1.1268	0.457081	2.46522	0.0136931	0.278031	INMT
ENSG00000187546	10.8385	2.02374	0.821025	2.46489	0.0137054	0.278031	AGMO
ENSG00000261069	16828.5	2.5141	1.02022	2.46428	0.013729	0.278248	RP11-701H24.4
ENSG00000240489	173.078	-0.578876	0.234957	-2.46375	0.013749	0.278295	SETP14
ENSG00000163491	46.4526	-0.756797	0.307198	-2.46354	0.0137571	0.278295	NEK10
ENSG00000278451	28.0435	1.06984	0.434362	2.463	0.0137778	0.278452	RP11-923I11.8
ENSG00000164591	393.933	-0.53915	0.218954	-2.4624	0.0138012	0.278664	MYOZ3
ENSG00000117868	7260.76	1.04631	0.425254	2.46042	0.0138773	0.279413	ESYT2
ENSG00000250144	333.623	-0.757639	0.307891	-2.46074	0.0138651	0.279413	RP11-553P9.1
ENSG00000138100	56.4153	-0.842963	0.342584	-2.46061	0.0138702	0.279413	TRIM54
ENSG00000026025	4601.32	-1.10864	0.451326	-2.45642	0.014033	0.279417	VIM
ENSG00000137411	1817.2	0.463477	0.188507	2.45867	0.0139451	0.279417	VARS2
ENSG00000179299	1514.64	0.360773	0.146765	2.45817	0.0139645	0.279417	NSUN7
ENSG00000171246	1257.01	-1.09408	0.445381	-2.4565	0.0140296	0.279417	NPTX1
ENSG00000198888	911.731	0.546926	0.222542	2.45763	0.0139855	0.279417	MT-ND1
ENSG00000100626	258.982	-0.580021	0.236125	-2.45642	0.0140331	0.279417	GALNT16
ENSG00000173846	220.869	0.560555	0.228098	2.45752	0.0139901	0.279417	PLK3
ENSG00000207322	43.8987	-2.8512	1.16016	-2.45758	0.0139875	0.279417	RNU1-89P
ENSG00000159387	21.2879	-2.61671	1.06484	-2.45738	0.0139956	0.279417	IRX6
ENSG00000162399	13.468	-1.48107	0.602836	-2.45683	0.0140168	0.279417	BSND
ENSG00000235454	11.1277	-1.76116	0.716408	-2.45831	0.0139591	0.279417	HAUS6P3
ENSG00000180458	7.45029	3.20341	1.30287	2.45873	0.0139428	0.279417	CTD-3064H18.4
ENSG00000137393	416.323	-0.695054	0.28306	-2.4555	0.0140689	0.279613	RNF144B
ENSG00000232134	17.419	-1.42807	0.581568	-2.45555	0.0140669	0.279613	RPS15AP12
ENSG00000174371	2415.75	-0.498481	0.203063	-2.45481	0.0140961	0.279614	EXO1
ENSG00000203666	227.486	-0.504229	0.20543	-2.45451	0.0141079	0.279614	EFCAB2
ENSG00000188659	49.0358	-1.0928	0.445161	-2.45485	0.0140943	0.279614	SAXO2
ENSG00000282978	42.1231	-1.02191	0.4165	-2.45357	0.0141444	0.279823	RP11-144C15.2
ENSG00000260475	18.9626	1.26513	0.515571	2.45384	0.0141338	0.279823	RP11-85A1.3
ENSG00000275700	2161.6	-0.356776	0.145568	-2.45093	0.0142488	0.280979	AATF
ENSG00000116667	1526.76	-0.519507	0.211977	-2.45077	0.014255	0.280979	C1orf21
ENSG00000105248	839.829	-0.358601	0.1463	-2.45114	0.0142405	0.280979	CCDC94
ENSG00000179978	20.4062	1.07422	0.438271	2.45105	0.0142438	0.280979	RP11-1319K7.1
ENSG00000150961	3356.53	-0.392402	0.160258	-2.44856	0.0143427	0.282449	SEC24D
ENSG00000243547	130.133	-0.735193	0.300562	-2.44606	0.0144427	0.283899	HNRNPKP4
ENSG00000189409	77.2778	0.983353	0.401991	2.4462	0.0144369	0.283899	MMP23B
ENSG00000125746	753.761	0.438463	0.179314	2.44522	0.0144763	0.2843	EML2
ENSG00000225548	81.4642	0.741274	0.303232	2.44457	0.0145023	0.284551	AC098973.2
ENSG00000278969	6.16797	2.0877	0.854244	2.44391	0.0145289	0.284815	RP11-662I13.3
ENSG00000197818	441.32	-0.452002	0.185091	-2.44205	0.0146039	0.285247	SLC9A8
ENSG00000186868	86.6667	0.678986	0.277967	2.44269	0.0145783	0.285247	MAPT
ENSG00000278156	76.4699	0.604077	0.247336	2.44234	0.0145924	0.285247	TSC22D1-AS1
ENSG00000230699	16.2102	1.62204	0.664178	2.44218	0.0145988	0.285247	RP11-54O7.1
ENSG00000123643	744.519	-0.532804	0.218267	-2.44107	0.014644	0.285769	SLC36A1
ENSG00000129003	4221.75	0.79908	0.327535	2.43968	0.0147005	0.286612	VPS13C
ENSG00000198885	473.828	-0.516396	0.211754	-2.43866	0.0147416	0.286896	ITPRIPL1
ENSG00000263597	7.86896	2.13225	0.874286	2.43884	0.0147343	0.286896	MIR3936
ENSG00000161558	276.338	0.521849	0.214048	2.438	0.0147687	0.287162	TMEM143
ENSG00000226180	45.5164	-0.955646	0.392053	-2.43754	0.0147875	0.28727	RP11-278A23.1
ENSG00000214222	44.4053	-0.986179	0.40489	-2.43567	0.0148642	0.288499	TUBBP2
ENSG00000171861	706.778	-0.470352	0.193211	-2.4344	0.0149166	0.289256	MRM3
ENSG00000162946	136.696	-0.600159	0.246714	-2.43261	0.0149903	0.290423	DISC1
ENSG00000187634	41.8004	1.45706	0.599511	2.43042	0.0150815	0.291927	SAMD11
ENSG00000260916	115.634	0.784869	0.322995	2.42997	0.0151001	0.292026	CCPG1
ENSG00000169855	7683.15	0.663552	0.27321	2.42873	0.0151519	0.292764	ROBO1
ENSG00000147459	1525.98	-0.324051	0.133555	-2.42635	0.0152514	0.294424	DOCK5
ENSG00000129455	27.5353	0.92445	0.381072	2.42592	0.0152696	0.29451	KLK8
ENSG00000115053	31146.3	-0.351687	0.145041	-2.42474	0.0153192	0.294557	NCL
ENSG00000170291	1022.75	-0.305611	0.126067	-2.42419	0.0153426	0.294557	ELP5
ENSG00000115183	973.276	-0.354419	0.146217	-2.42392	0.0153541	0.294557	TANC1
ENSG00000277767	37.7925	0.774589	0.319501	2.42437	0.0153348	0.294557	RP11-365P13.5
ENSG00000125869	29.6982	-1.63802	0.67576	-2.42397	0.0153518	0.294557	LAMP5
ENSG00000200737	7.74337	2.21093	0.912055	2.42412	0.0153457	0.294557	Y
ENSG00000187017	362.54	0.885394	0.365344	2.42345	0.0153737	0.294672	ESPN
ENSG00000249042	161.633	0.788433	0.325872	2.41946	0.0155437	0.29642	CTD-2015H6.3
ENSG00000246596	87.1656	-0.833042	0.344322	-2.41937	0.0155475	0.29642	RP11-1277A3.2
ENSG00000243005	35.3725	-0.837446	0.346113	-2.41957	0.0155388	0.29642	RN7SL16P
ENSG00000277007	34.8815	0.935488	0.386608	2.41973	0.0155319	0.29642	RP11-392O17.2
ENSG00000157111	34.6804	1.0766	0.444787	2.42049	0.0154996	0.29642	TMEM171
ENSG00000214617	7.5911	-6.84854	2.82981	-2.42014	0.0155144	0.29642	SLC6A10P
ENSG00000103187	3413.01	-0.5225	0.216095	-2.41791	0.0156099	0.296561	COTL1
ENSG00000088876	304.639	0.448005	0.185262	2.41823	0.0155962	0.296561	ZNF343
ENSG00000170469	179.808	-0.480975	0.198843	-2.41887	0.0155686	0.296561	SPATA24
ENSG00000183117	117.931	0.951451	0.393435	2.41832	0.0155924	0.296561	CSMD1
ENSG00000198830	6192.09	-0.364293	0.150768	-2.41626	0.015681	0.296604	HMGN2
ENSG00000104375	1130.58	0.606863	0.251125	2.41658	0.0156672	0.296604	STK3
ENSG00000162999	174.807	0.649176	0.268666	2.41629	0.0156795	0.296604	DUSP19
ENSG00000258099	27.9443	0.977403	0.40438	2.41704	0.0156472	0.296604	ATXN2-AS
ENSG00000261848	19.5004	1.32334	0.547612	2.41656	0.015668	0.296604	CTD-2309O5.3
ENSG00000253250	791.598	0.786121	0.325471	2.41533	0.0157208	0.296931	C8orf88
ENSG00000259612	192.554	-0.705523	0.292116	-2.41522	0.0157259	0.296931	EEF1A1P22
ENSG00000136861	3503.13	-0.371217	0.153758	-2.4143	0.0157655	0.297418	CDK5RAP2
ENSG00000165996	393.205	-0.732993	0.303775	-2.41295	0.0158241	0.297505	HACD1
ENSG00000041982	299.738	-1.08711	0.450536	-2.41292	0.0158253	0.297505	TNC
ENSG00000141526	180.614	1.35388	0.561094	2.41294	0.0158246	0.297505	SLC16A3
ENSG00000279094	12.904	-1.78317	0.738909	-2.41325	0.0158111	0.297505	CH507-24F1.1
ENSG00000133026	30101.4	-0.302601	0.125446	-2.41221	0.0158562	0.297566	MYH10
ENSG00000155980	1063.79	-0.536778	0.22251	-2.41238	0.0158487	0.297566	KIF5A
ENSG00000188501	286.35	-0.73429	0.304559	-2.411	0.015909	0.298039	LCTL
ENSG00000134202	120.767	-0.606584	0.25156	-2.41129	0.0158962	0.298039	GSTM3
ENSG00000143515	3578.51	-0.469022	0.194665	-2.40938	0.0159795	0.298603	ATP8B2
ENSG00000105643	180.591	0.651757	0.270531	2.40918	0.0159886	0.298603	ARRDC2
ENSG00000203811	91.4783	-1.04491	0.433783	-2.40884	0.0160035	0.298603	HIST2H3C
ENSG00000226913	50.5932	0.755996	0.313858	2.40872	0.0160085	0.298603	BSN-AS2
ENSG00000276107	35.3436	0.958478	0.397775	2.4096	0.01597	0.298603	CTD-2033D15.2
ENSG00000236444	5.96285	1.9616	0.814712	2.40773	0.0160522	0.299159	UBE2L5P
ENSG00000260412	58.0152	0.940653	0.390848	2.4067	0.0160976	0.299746	RP11-438B23.2
ENSG00000241061	51.565	-1.02798	0.427209	-2.40628	0.0161161	0.299832	RPL5P1
ENSG00000272894	69.4105	0.75785	0.315036	2.4056	0.0161459	0.300126	RP5-1159O4.1
ENSG00000197721	84.5598	1.23751	0.51462	2.40471	0.0161853	0.3006	CR1L
ENSG00000187792	309.814	-0.560727	0.233447	-2.40195	0.016308	0.302358	ZNF70
ENSG00000135905	106.154	-0.573969	0.238944	-2.4021	0.0163011	0.302358	DOCK10
ENSG00000141736	11764.4	-0.586335	0.244237	-2.40068	0.0163646	0.30256	ERBB2
ENSG00000207357	231.458	-1.79733	0.74875	-2.40045	0.0163751	0.30256	RNU6-2
ENSG00000270276	52.8021	-0.975373	0.406302	-2.40061	0.0163676	0.30256	HIST2H4B
ENSG00000203896	20.1709	-1.49533	0.622915	-2.40054	0.0163709	0.30256	LIME1
ENSG00000143772	735.002	0.775201	0.323222	2.39836	0.0164688	0.303771	ITPKB
ENSG00000279117	220.85	1.34452	0.5606	2.39836	0.0164688	0.303771	CTD-2562J17.6
ENSG00000183853	2401.7	-0.518587	0.216462	-2.39574	0.0165867	0.304875	KIRREL
ENSG00000198874	1243.45	-0.313548	0.130836	-2.39649	0.0165528	0.304875	TYW1
ENSG00000136950	898.627	-0.437684	0.182714	-2.39546	0.0165994	0.304875	ARPC5L
ENSG00000007255	582.475	0.466132	0.194535	2.39614	0.016569	0.304875	TRAPPC6A
ENSG00000270872	85.482	1.18857	0.496145	2.39561	0.0165927	0.304875	SRGAP2D
ENSG00000234028	152.631	0.565883	0.236343	2.39433	0.0166507	0.305557	AC062029.1
ENSG00000277526	7.47199	-2.45545	1.02584	-2.39361	0.0166836	0.305898	RP11-378A12.1
ENSG00000172992	1650.86	0.436497	0.182403	2.39304	0.0167096	0.306116	DCAKD
ENSG00000231532	14.647	1.38644	0.579528	2.39237	0.0167401	0.306414	LINC01249
ENSG00000161798	52.0983	0.704267	0.294594	2.39064	0.0168192	0.306818	AQP5
ENSG00000251026	11.4738	1.53096	0.640366	2.39076	0.0168137	0.306818	RP11-138J23.1
ENSG00000266805	7.76262	1.86614	0.780566	2.39076	0.0168136	0.306818	RP11-61L19.1
ENSG00000254701	7.56787	2.10781	0.881547	2.39103	0.016801	0.306818	RP11-1415C14.4
ENSG00000120129	393.309	0.630127	0.263865	2.38807	0.0169373	0.308712	DUSP1
ENSG00000179218	19265.9	-0.388354	0.16281	-2.38533	0.0170639	0.308757	CALR
ENSG00000140416	11545.3	-0.53033	0.222144	-2.38733	0.0169713	0.308757	TPM1
ENSG00000168906	8236.31	-0.452031	0.189378	-2.38693	0.0169898	0.308757	MAT2A
ENSG00000206621	1897.86	0.823016	0.345118	2.38474	0.0170913	0.308757	SNORD116-14
ENSG00000164236	833.103	-0.631553	0.264706	-2.38587	0.0170388	0.308757	ANKRD33B
ENSG00000092871	736.847	0.424565	0.178015	2.385	0.0170792	0.308757	RFFL
ENSG00000178127	420.925	0.44935	0.188438	2.38461	0.0170974	0.308757	NDUFV2
ENSG00000228526	418.204	0.537849	0.225494	2.3852	0.0170698	0.308757	MIR34A
ENSG00000225573	92.5762	-0.649909	0.27235	-2.3863	0.017019	0.308757	RPL35P5
ENSG00000154319	66.8939	-0.952995	0.399342	-2.38641	0.0170136	0.308757	FAM167A
ENSG00000259030	12.6624	1.71283	0.717891	2.38592	0.0170364	0.308757	FPGT-TNNI3K
ENSG00000182853	9.11315	1.82305	0.764645	2.38418	0.0171172	0.308855	VMO1
ENSG00000160208	6342.28	-0.398931	0.167577	-2.38059	0.0172849	0.310784	RRP1B
ENSG00000175643	2007.65	-0.340146	0.142877	-2.38069	0.0172801	0.310784	RMI2
ENSG00000250486	129.04	0.718719	0.301956	2.38021	0.0173028	0.310784	FAM218A
ENSG00000108798	83.2526	-0.810615	0.340571	-2.38016	0.017305	0.310784	ABI3
ENSG00000188050	21.1949	1.48934	0.625761	2.38004	0.0173106	0.310784	RNF133
ENSG00000231827	7.42703	-1.95674	0.821853	-2.38089	0.017271	0.310784	RP11-216N14.5
ENSG00000100116	1064.79	0.4428	0.186077	2.37966	0.0173286	0.310848	GCAT
ENSG00000233927	8365.38	0.395022	0.166029	2.37924	0.0173486	0.310941	RPS28
ENSG00000173281	2221.13	0.835097	0.351038	2.37894	0.0173627	0.310941	PPP1R3B
ENSG00000226525	147.699	-0.725027	0.304834	-2.37843	0.0173865	0.311108	RPS7P10
ENSG00000170919	405.107	0.719217	0.302477	2.37775	0.0174184	0.311347	TPT1-AS1
ENSG00000214140	45.0442	1.00097	0.421065	2.37723	0.0174432	0.311347	PRCD
ENSG00000167588	12.1425	-1.48409	0.624285	-2.37727	0.0174414	0.311347	GPD1
ENSG00000280987	359.723	-0.567841	0.239067	-2.37523	0.0175378	0.312777	MATR3
ENSG00000277511	17.4109	1.315	0.553751	2.37472	0.0175624	0.312929	CTD-2095E4.5
ENSG00000265933	17.3441	1.58557	0.667766	2.37444	0.0175754	0.312929	LINC00668
ENSG00000104883	93.0372	0.656395	0.276584	2.37323	0.0176335	0.312929	PEX11G
ENSG00000229980	69.1243	0.797501	0.335915	2.37412	0.0175911	0.312929	TOB1-AS1
ENSG00000267009	14.5364	1.35176	0.56953	2.37347	0.017622	0.312929	RP11-120M18.2
ENSG00000172478	7.36711	2.66665	1.12363	2.37325	0.0176323	0.312929	C2orf54
ENSG00000237296	605.852	0.462124	0.194781	2.37253	0.0176666	0.313259	SMG1P1
ENSG00000170100	1263.33	-0.505636	0.213153	-2.37218	0.0176836	0.313303	ZNF778
ENSG00000128656	1227.68	-0.43483	0.183418	-2.37071	0.0177542	0.313781	CHN1
ENSG00000183506	347.701	-0.685833	0.289258	-2.37101	0.0177397	0.313781	PI4KAP2
ENSG00000196834	36.8887	-1.13404	0.478355	-2.3707	0.0177543	0.313781	POTEI
ENSG00000116337	1341.78	-0.444683	0.187633	-2.36997	0.0177897	0.313782	AMPD2
ENSG00000147655	24.0383	-1.22893	0.518458	-2.37036	0.0177709	0.313782	RSPO2
ENSG00000223864	23.2567	-1.20778	0.509657	-2.36979	0.0177981	0.313782	NPM1P19
ENSG00000250241	57.9878	0.994986	0.419953	2.36928	0.0178228	0.31396	RP11-9G1.3
ENSG00000112659	619.219	0.598035	0.25249	2.36855	0.0178582	0.314327	CUL9
ENSG00000123977	27.2986	-1.56256	0.659968	-2.36764	0.017902	0.314841	DAW1
ENSG00000018236	860.164	-0.785719	0.33201	-2.36655	0.0179546	0.315489	CNTN1
ENSG00000282965	8.11841	2.00569	0.847614	2.36627	0.0179681	0.315489	RP11-683L23.7
ENSG00000124228	3078.57	-0.346357	0.146511	-2.36403	0.0180775	0.315556	DDX27
ENSG00000043514	1323.54	-0.406266	0.17186	-2.36394	0.018082	0.315556	TRIT1
ENSG00000205758	613.43	0.516255	0.218408	2.36372	0.0180925	0.315556	CRYZL1
ENSG00000174206	551.561	0.359397	0.152139	2.36229	0.0181623	0.315556	C12orf66
ENSG00000126005	344.669	0.643084	0.27211	2.36332	0.0181119	0.315556	MMP24-AS1
ENSG00000070159	328.81	0.472735	0.200056	2.36301	0.0181271	0.315556	PTPN3
ENSG00000184792	207.9	0.684646	0.289822	2.3623	0.0181619	0.315556	OSBP2
ENSG00000253878	86.4543	0.68573	0.289852	2.36579	0.0179917	0.315556	RP11-347C18.3
ENSG00000279329	56.4213	0.767763	0.32497	2.36257	0.0181489	0.315556	CTD-2553L13.9
ENSG00000231473	31.125	0.900825	0.381116	2.36365	0.0180961	0.315556	LINC00441
ENSG00000260625	26.4912	0.996284	0.421447	2.36396	0.0180807	0.315556	RP11-452L6.7
ENSG00000273175	18.7229	1.05856	0.44764	2.36476	0.0180418	0.315556	RP11-11N7.4
ENSG00000231313	13.4619	-1.79274	0.758838	-2.36249	0.0181529	0.315556	CLIC1P1
ENSG00000103152	1191.21	0.418444	0.177301	2.36008	0.0182712	0.31684	MPG
ENSG00000181481	427.995	0.39194	0.166084	2.35989	0.0182804	0.31684	RNF135
ENSG00000268696	12.3253	4.91011	2.08042	2.36015	0.0182677	0.31684	ZNF723P
ENSG00000164707	189.957	0.533154	0.22602	2.35888	0.0183301	0.317352	SLC13A4
ENSG00000206532	115.604	-2.38283	1.01023	-2.35869	0.0183394	0.317352	RP11-553A10.1
ENSG00000127328	1636.17	0.560429	0.237645	2.35826	0.0183607	0.317354	RAB3IP
ENSG00000164463	755.951	0.805452	0.341569	2.3581	0.018369	0.317354	CREBRF
ENSG00000243811	586.883	0.541157	0.229538	2.35759	0.0183939	0.317531	APOBEC3D
ENSG00000182134	1184.62	0.334721	0.141995	2.35728	0.0184096	0.317547	TDRKH
ENSG00000170515	5618.41	-0.341072	0.144885	-2.35409	0.0185683	0.320029	PA2G4
ENSG00000224669	28.3444	1.42799	0.606696	2.35371	0.0185871	0.320096	RP11-561N12.1
ENSG00000177807	19.7036	-1.37619	0.584997	-2.35248	0.0186486	0.320898	KCNJ10
ENSG00000109906	13.5835	1.51617	0.644611	2.35207	0.0186692	0.320998	ZBTB16
ENSG00000214711	17.7695	1.24462	0.529392	2.35104	0.018721	0.321632	CAPN14
ENSG00000207524	40.8802	1.30522	0.555338	2.35031	0.0187576	0.322002	RNU6-33P
ENSG00000187812	20.3102	1.44604	0.615396	2.34977	0.0187849	0.322214	RP11-24M17.5
ENSG00000165476	1585.76	0.553089	0.235663	2.34695	0.0189279	0.323191	REEP3
ENSG00000113319	1447.52	-0.869293	0.370541	-2.34601	0.0189755	0.323191	RASGRF2
ENSG00000081721	674.961	-0.409545	0.174495	-2.34703	0.0189239	0.323191	DUSP12
ENSG00000049246	639.883	0.556055	0.237008	2.34614	0.0189688	0.323191	PER3
ENSG00000178573	350.025	1.09078	0.46473	2.34713	0.0189185	0.323191	MAF
ENSG00000108733	231.797	0.594983	0.253453	2.3475	0.0188997	0.323191	PEX12
ENSG00000229692	117.371	0.652659	0.278088	2.34695	0.0189279	0.323191	SOS1-IT1
ENSG00000275765	81.7781	0.591766	0.252169	2.34671	0.0189401	0.323191	RP11-54C4.3
ENSG00000271882	11.0709	1.4766	0.629414	2.34599	0.0189768	0.323191	KB-1410C5.5
ENSG00000256167	16.6396	-1.4411	0.614386	-2.34559	0.0189968	0.323277	ATF4P4
ENSG00000111432	44.6508	1.66648	0.710564	2.34529	0.0190123	0.323284	FZD10
ENSG00000249855	489.98	-0.599451	0.255698	-2.34437	0.0190594	0.323824	EEF1A1P19
ENSG00000142327	184.954	0.668359	0.285126	2.34408	0.0190741	0.323824	RNPEPL1
ENSG00000271254	269.745	0.71382	0.304737	2.34241	0.0191597	0.324625	AC240274.1
ENSG00000161835	200.706	0.764527	0.326385	2.34241	0.0191596	0.324625	GRASP
ENSG00000205056	6.5237	-2.33642	0.997498	-2.34228	0.0191665	0.324625	RP11-693J15.5
ENSG00000169683	1051.47	-0.443134	0.189233	-2.34174	0.019194	0.324835	LRRC45
ENSG00000242445	68.3534	-0.691078	0.295188	-2.34115	0.0192246	0.325098	RPL7AP11
ENSG00000109323	2320.99	-0.342266	0.146252	-2.34026	0.0192704	0.325616	MANBA
ENSG00000169896	47.3609	1.09774	0.469291	2.33914	0.0193279	0.326333	ITGAM
ENSG00000237517	109.463	-0.673628	0.288115	-2.33805	0.0193844	0.326519	DGCR5
ENSG00000259953	35.2138	0.810064	0.346404	2.3385	0.0193616	0.326519	RP11-4O1.2
ENSG00000272031	22.9448	1.16849	0.499756	2.33812	0.0193809	0.326519	ANKRD34A
ENSG00000272702	39.1412	0.7351	0.314499	2.33737	0.0194201	0.326865	RP11-44N22.3
ENSG00000182013	1568.85	-0.451271	0.193205	-2.33572	0.019506	0.327642	PNMAL1
ENSG00000142166	601.767	0.427924	0.183218	2.3356	0.0195119	0.327642	IFNAR1
ENSG00000186470	302.52	0.807431	0.345654	2.33595	0.0194937	0.327642	BTN3A2
ENSG00000180481	11.3794	1.46881	0.629061	2.33493	0.0195471	0.327977	GLIPR1L2
ENSG00000164078	116.094	0.569976	0.244175	2.33429	0.0195806	0.328028	MST1R
ENSG00000275371	9.37018	-2.93938	1.25921	-2.3343	0.0195801	0.328028	RP11-455F5.6
ENSG00000185000	680.722	0.425575	0.18237	2.33358	0.0196176	0.328393	DGAT1
ENSG00000138092	1852.35	-0.341438	0.146368	-2.33274	0.019662	0.328703	CENPO
ENSG00000226476	59.3187	1.1189	0.47967	2.33265	0.0196667	0.328703	RP11-776H12.1
ENSG00000254333	9.37376	1.56521	0.671373	2.33135	0.0197347	0.329585	CTC-367J11.1
ENSG00000078549	1202.28	-0.740845	0.317878	-2.33059	0.0197748	0.329999	ADCYAP1R1
ENSG00000115339	1084.01	0.720372	0.309159	2.3301	0.0198007	0.330173	GALNT3
ENSG00000167641	160.567	0.566076	0.242991	2.32962	0.0198264	0.330173	PPP1R14A
ENSG00000196748	46.0278	0.774784	0.332598	2.32949	0.019833	0.330173	CLPSL2
ENSG00000234268	44.1438	-0.828285	0.355604	-2.32924	0.0198465	0.330173	AP000936.1
ENSG00000164403	172.092	0.537396	0.230783	2.32858	0.0198813	0.330496	SHROOM1
ENSG00000248540	41.151	1.64881	0.708305	2.32782	0.0199215	0.330909	RP11-247C2.2
ENSG00000237036	171.376	0.58004	0.249268	2.32698	0.0199665	0.331402	ZEB1-AS1
ENSG00000164331	598.795	0.471767	0.202781	2.32648	0.0199927	0.33158	ANKRA2
ENSG00000272047	577.299	0.613681	0.263861	2.32577	0.0200309	0.331958	GTF2H5
ENSG00000132639	23.0134	-1.00428	0.431907	-2.32521	0.0200606	0.332195	SNAP25
ENSG00000255318	26.3315	-1.18149	0.508344	-2.3242	0.0201146	0.332834	RP11-655M14.13
ENSG00000248740	45.1003	0.921055	0.396369	2.32373	0.0201399	0.332996	RP11-328K4.1
ENSG00000206053	5838.74	-0.323184	0.139203	-2.32168	0.0202503	0.333124	HN1L
ENSG00000104331	2301.85	0.404638	0.174341	2.32096	0.0202892	0.333124	IMPAD1
ENSG00000129347	1359.7	-0.467151	0.201265	-2.32107	0.020283	0.333124	KRI1
ENSG00000178927	1307.45	-0.474274	0.204191	-2.3227	0.0201954	0.333124	C17orf62
ENSG00000256087	539.213	0.61969	0.267075	2.32029	0.0203254	0.333124	ZNF432
ENSG00000103253	412.548	0.440694	0.189698	2.32313	0.020172	0.333124	HAGHL
ENSG00000260711	105.395	0.621691	0.267861	2.32095	0.0202896	0.333124	RP11-747H7.3
ENSG00000255085	65.5621	1.06922	0.460465	2.32204	0.0202307	0.333124	AF186192.5
ENSG00000226015	45.7435	-0.883077	0.380557	-2.32049	0.0203146	0.333124	CCT8P1
ENSG00000116032	27.7659	1.12099	0.483155	2.32014	0.0203332	0.333124	GRIN3B
ENSG00000247121	23.1764	1.17256	0.504826	2.3227	0.0201952	0.333124	CTD-2260A17.2
ENSG00000259570	10.9442	-1.4855	0.640116	-2.32067	0.0203048	0.333124	RP11-671M22.4
ENSG00000112130	1568.13	-0.316549	0.13655	-2.3182	0.0204385	0.334595	RNF8
ENSG00000141543	4310.4	-0.352508	0.152232	-2.31559	0.0205807	0.33493	EIF4A3
ENSG00000167645	1957.43	0.416494	0.179799	2.31644	0.0205342	0.33493	YIF1B
ENSG00000099785	684.459	0.39072	0.168755	2.31532	0.0205956	0.33493	MARCH2
ENSG00000143507	135.009	0.830784	0.358754	2.31574	0.0205722	0.33493	DUSP10
ENSG00000172594	78.781	-0.674334	0.29122	-2.31555	0.0205828	0.33493	SMPDL3A
ENSG00000266931	68.1822	1.06341	0.459198	2.3158	0.0205694	0.33493	RP11-1252D15.1
ENSG00000271614	42.0908	0.75169	0.324429	2.31696	0.0205057	0.33493	LINC00936
ENSG00000204291	19.1289	-1.18795	0.513097	-2.31526	0.0205989	0.33493	COL15A1
ENSG00000230439	15.2461	1.26729	0.547301	2.31553	0.0205841	0.33493	RP11-488P3.1
ENSG00000101361	9573.51	-0.417819	0.180597	-2.31354	0.020693	0.335701	NOP56
ENSG00000091732	1206.45	-0.322538	0.139398	-2.31379	0.0206792	0.335701	ZC3HC1
ENSG00000247498	51.0149	5.21826	2.25507	2.31402	0.0206669	0.335701	RP11-392P7.6
ENSG00000013275	3999.96	-0.33758	0.145944	-2.31308	0.020718	0.335853	PSMC4
ENSG00000216775	476.01	-0.69385	0.300148	-2.31169	0.0207945	0.33684	RP1-152L7.5
ENSG00000228944	19.8566	-1.04276	0.451152	-2.31132	0.0208149	0.336918	AC004485.3
ENSG00000100413	815.47	-0.552176	0.238964	-2.31071	0.020849	0.337216	POLR3H
ENSG00000104738	15024.1	-0.365843	0.158416	-2.30938	0.0209223	0.337409	MCM4
ENSG00000177519	162.079	1.16449	0.504178	2.30969	0.0209053	0.337409	RPRM
ENSG00000254349	38.5541	0.998834	0.432516	2.30936	0.0209236	0.337409	MIR2052HG
ENSG00000141497	12.4106	1.49444	0.646895	2.31018	0.0208781	0.337409	ZMYND15
ENSG00000204642	145.751	0.509758	0.220771	2.30899	0.0209441	0.337487	HLA-F
ENSG00000113758	13002.3	-0.369285	0.159964	-2.30856	0.0209682	0.337583	DBN1
ENSG00000145934	208.623	-0.825657	0.357688	-2.30832	0.0209814	0.337583	TENM2
ENSG00000118162	307.926	0.421361	0.182593	2.30765	0.0210186	0.337694	KPTN
ENSG00000250519	37.3059	-0.852284	0.369333	-2.30763	0.0210196	0.337694	RP11-680H20.2
ENSG00000278771	47012.7	0.6532	0.283142	2.30697	0.0210567	0.338036	Metazoa
ENSG00000233476	739.56	-0.484195	0.209944	-2.30631	0.0210933	0.338121	EEF1A1P6
ENSG00000173156	353.506	0.437117	0.189517	2.30648	0.0210837	0.338121	RHOD
ENSG00000171724	2561.35	-0.849267	0.368675	-2.30357	0.0212469	0.338509	VAT1L
ENSG00000053372	2220.24	-0.426001	0.184826	-2.30487	0.0211739	0.338509	MRTO4
ENSG00000091436	1562.59	0.341265	0.14816	2.30335	0.0212589	0.338509	AC013461.1
ENSG00000172123	933.934	0.677911	0.294276	2.30366	0.0212419	0.338509	SLFN12
ENSG00000163116	25.5244	0.906635	0.393575	2.30359	0.0212458	0.338509	STPG2
ENSG00000213938	25.1798	-0.934792	0.405638	-2.3045	0.0211948	0.338509	SEPHS1P6
ENSG00000135824	16.5045	-1.42417	0.617948	-2.30468	0.0211843	0.338509	RGS8
ENSG00000215302	16.1655	1.15295	0.500445	2.30385	0.021231	0.338509	CTD-3092A11.1
ENSG00000230212	13.1782	-1.49935	0.650548	-2.30475	0.0211804	0.338509	AP000688.14
ENSG00000178996	1601.19	0.323151	0.140358	2.30234	0.0213159	0.338641	SNX18
ENSG00000130165	1356.83	-0.36623	0.159082	-2.30214	0.0213273	0.338641	ELOF1
ENSG00000157601	334.066	-0.42942	0.186477	-2.30281	0.0212896	0.338641	MX1
ENSG00000221821	38.157	0.741832	0.322243	2.30209	0.0213301	0.338641	C6orf226
ENSG00000155324	620.158	0.500904	0.217696	2.30093	0.0213953	0.339177	GRAMD3
ENSG00000279348	216.829	-0.556103	0.241682	-2.30097	0.0213933	0.339177	RP11-566E18.1
ENSG00000230648	9.08186	1.62434	0.706075	2.30052	0.0214188	0.3393	RP3-406P24.3
ENSG00000099194	50161.6	-0.285116	0.123984	-2.29962	0.0214699	0.339605	SCD
ENSG00000110711	762.467	0.472604	0.205613	2.29851	0.0215327	0.339605	AIP
ENSG00000223745	604.443	0.542997	0.236236	2.29853	0.0215315	0.339605	CCDC18-AS1
ENSG00000188026	305.417	0.806761	0.350987	2.29855	0.0215307	0.339605	RILPL1
ENSG00000242114	113.05	-0.475538	0.206786	-2.29966	0.0214674	0.339605	MTFP1
ENSG00000244757	7.87954	1.64982	0.717631	2.29898	0.021506	0.339605	RP11-45A16.4
ENSG00000273320	35.2476	1.04037	0.452688	2.2982	0.0215505	0.339637	RP11-22N19.2
ENSG00000114796	3697.66	0.611843	0.26636	2.29705	0.0216158	0.340181	KLHL24
ENSG00000134109	1035.19	0.461346	0.200878	2.29665	0.0216388	0.340181	EDEM1
ENSG00000132698	968.286	0.47704	0.207755	2.29616	0.0216666	0.340181	RAB25
ENSG00000151468	64.7071	-0.822694	0.358327	-2.29593	0.0216798	0.340181	CCDC3
ENSG00000275401	25.0672	-0.91249	0.397347	-2.29646	0.0216498	0.340181	RP4-564F22.7
ENSG00000269604	13.4632	-2.39165	1.04125	-2.2969	0.0216246	0.340181	AC005523.2
ENSG00000248774	96.5137	0.915007	0.39862	2.29544	0.0217081	0.340379	RP11-798M19.3
ENSG00000198732	44.0161	-1.20608	0.525714	-2.29418	0.0217801	0.341258	SMOC1
ENSG00000262096	17.1627	1.89297	0.825406	2.29339	0.0218257	0.341725	PCDHB19P
ENSG00000099864	347.579	0.716069	0.312294	2.29293	0.0218521	0.341889	PALM
ENSG00000176915	3264.16	-0.302487	0.131953	-2.29237	0.0218841	0.342141	ANKLE2
ENSG00000159753	584.982	0.569742	0.248599	2.29181	0.0219166	0.342153	CARMIL2
ENSG00000128262	13.0957	-1.29811	0.56636	-2.29203	0.0219042	0.342153	POM121L9P
ENSG00000108439	425.414	-0.545046	0.237886	-2.29121	0.0219513	0.34234	PNPO
ENSG00000214077	62.0577	-0.721626	0.314976	-2.29105	0.0219604	0.34234	GNAQP1
ENSG00000116455	1496.27	-0.345653	0.150961	-2.28968	0.0220396	0.342661	WDR77
ENSG00000128805	335.154	-0.514677	0.224843	-2.28905	0.0220764	0.342661	ARHGAP22
ENSG00000102890	240.95	0.539873	0.235747	2.29005	0.0220182	0.342661	ELMO3
ENSG00000230667	127.76	-0.776995	0.339264	-2.29024	0.0220074	0.342661	SETSIP
ENSG00000263711	30.6958	8.94622	3.90777	2.28934	0.0220594	0.342661	RP11-169F17.1
ENSG00000277453	30.4218	1.06023	0.463166	2.28909	0.0220742	0.342661	CTC-492K19.7
ENSG00000198131	1940.8	-0.401834	0.175573	-2.2887	0.0220969	0.342733	ZNF544
ENSG00000181472	1012.15	-0.400107	0.174886	-2.28781	0.0221487	0.343288	ZBTB2
ENSG00000129595	334.05	0.396157	0.173238	2.28678	0.0222087	0.343971	EPB41L4A
ENSG00000135473	2217.71	0.443837	0.194161	2.28592	0.0222591	0.344505	PAN2
ENSG00000103266	1864.05	-0.378978	0.165942	-2.2838	0.0223832	0.345817	STUB1
ENSG00000104129	741.956	-0.319637	0.139956	-2.28384	0.022381	0.345817	DNAJC17
ENSG00000272674	95.5594	0.794699	0.347995	2.28365	0.022392	0.345817	PCDHB16
ENSG00000268034	37.3835	-0.84446	0.370036	-2.2821	0.0224834	0.346978	AC005795.1
ENSG00000185808	261.974	0.433174	0.189856	2.28159	0.0225137	0.347198	PIGP
ENSG00000267272	87.8932	0.668447	0.293038	2.2811	0.0225427	0.347396	LINC01140
ENSG00000114904	1759.87	-0.386631	0.169543	-2.28043	0.022582	0.347753	NEK4
ENSG00000168913	478.968	0.405296	0.177824	2.2792	0.022655	0.348626	ENHO
ENSG00000162755	201.702	0.452746	0.198666	2.27893	0.022671	0.348626	KLHDC9
ENSG00000099901	8918.69	-0.40686	0.178591	-2.27816	0.0227169	0.348924	RANBP1
ENSG00000140386	881.669	0.452463	0.198617	2.27806	0.0227228	0.348924	SCAPER
ENSG00000167508	2405.76	-0.31618	0.138851	-2.27711	0.0227794	0.349046	MVD
ENSG00000237906	8.6628	1.70603	0.749122	2.27737	0.0227641	0.349046	MUPP
ENSG00000259450	6.00934	1.76068	0.773136	2.27733	0.0227666	0.349046	RP11-265N7.1
ENSG00000185043	357.455	0.428377	0.188196	2.27623	0.0228325	0.349611	CIB1
ENSG00000152558	4300.74	0.529295	0.232669	2.27488	0.0229131	0.350099	TMEM123
ENSG00000128965	1244.07	0.702372	0.308728	2.27505	0.0229028	0.350099	CHAC1
ENSG00000140450	281.296	0.877093	0.385553	2.2749	0.022912	0.350099	ARRDC4
ENSG00000002834	8994.21	-0.36551	0.160697	-2.27453	0.0229343	0.350175	LASP1
ENSG00000279852	171.276	-0.452482	0.198976	-2.27405	0.0229629	0.350363	RP11-91J19.2
ENSG00000110675	28.8607	-0.955146	0.420306	-2.2725	0.0230564	0.351541	ELMOD1
ENSG00000259048	67.6591	1.18896	0.523326	2.27193	0.023091	0.351819	CTD-2058B24.2
ENSG00000270504	34.3425	1.40176	0.617214	2.27111	0.0231401	0.352319	RP11-420L9.5
ENSG00000065978	47788	-0.293495	0.129295	-2.26996	0.02321	0.353132	YBX1
ENSG00000151553	1564.61	0.480784	0.211951	2.26837	0.0233066	0.353673	FAM160B1
ENSG00000124275	1496.53	-0.35753	0.157608	-2.26847	0.0233004	0.353673	MTRR
ENSG00000185495	275.383	0.451534	0.199012	2.26887	0.0232762	0.353673	RP11-504P24.3
ENSG00000177990	137.616	-0.647772	0.285576	-2.2683	0.0233111	0.353673	DPY19L2
ENSG00000279191	8.90213	-1.49201	0.657902	-2.26783	0.0233399	0.353859	RP11-803D5.1
ENSG00000235106	492.508	-0.436087	0.19232	-2.26751	0.0233592	0.353903	LINC00094
ENSG00000037897	455.299	-0.426191	0.188028	-2.26663	0.0234127	0.354081	METTL1
ENSG00000221869	166.271	0.733964	0.323851	2.26636	0.0234294	0.354081	CEBPD
ENSG00000125657	54.0315	0.86945	0.383619	2.26644	0.0234243	0.354081	TNFSF9
ENSG00000240392	22.5473	-1.08912	0.480586	-2.26624	0.0234367	0.354081	RPL9P3
ENSG00000229150	130.836	0.652111	0.287791	2.26592	0.0234563	0.35413	CRYGEP
ENSG00000187609	233.151	0.677901	0.299296	2.26498	0.0235137	0.354747	EXD3
ENSG00000135077	7.70695	2.01969	0.892138	2.26388	0.0235817	0.355524	HAVCR2
ENSG00000169169	1519.28	-0.396463	0.175178	-2.26321	0.023623	0.355576	CPT1C
ENSG00000184144	90.3851	-0.954329	0.421607	-2.26355	0.0236016	0.355576	CNTN2
ENSG00000250186	15.1885	-2.81648	1.24457	-2.26302	0.0236346	0.355576	RP11-1079K10.4
ENSG00000085978	1810.6	-0.33859	0.149747	-2.26108	0.0237546	0.355594	ATG16L1
ENSG00000077348	983.381	-0.384473	0.169999	-2.26162	0.0237207	0.355594	EXOSC5
ENSG00000018408	656.317	0.402573	0.178	2.26165	0.0237193	0.355594	WWTR1
ENSG00000176845	576.703	0.782561	0.345921	2.26226	0.0236816	0.355594	METRNL
ENSG00000124134	155.503	0.577277	0.255301	2.26116	0.0237494	0.355594	KCNS1
ENSG00000170425	154.725	0.517474	0.22873	2.26237	0.0236744	0.355594	ADORA2B
ENSG00000233588	18.1964	-1.29214	0.571524	-2.26086	0.0237679	0.355594	CYP51A1P2
ENSG00000259967	6.67388	-1.9096	0.844339	-2.26166	0.0237187	0.355594	RP11-2E17.2
ENSG00000185885	2037.9	0.945223	0.418293	2.25972	0.0238389	0.356162	IFITM1
ENSG00000239672	1819.26	-0.573401	0.253741	-2.25979	0.0238343	0.356162	NME1
ENSG00000169877	48.7671	0.957288	0.423737	2.25915	0.0238738	0.356435	AHSP
ENSG00000166337	1682.79	0.406225	0.179882	2.25828	0.0239284	0.356558	TAF10
ENSG00000254614	94.81	-0.639689	0.283271	-2.25823	0.0239316	0.356558	AP003068.23
ENSG00000273062	25.782	0.830402	0.367656	2.25864	0.0239059	0.356558	RP11-428K3.1
ENSG00000124766	18379.7	0.373364	0.165365	2.25782	0.0239569	0.356688	SOX4
ENSG00000237152	8.05899	1.77819	0.787902	2.25687	0.0240161	0.357323	DLEU7-AS1
ENSG00000173890	1210.63	0.761577	0.337614	2.25576	0.0240854	0.358106	GPR160
ENSG00000152315	9.53988	-1.53054	0.678995	-2.25413	0.0241883	0.359387	KCNK13
ENSG00000170629	15.7189	-1.35	0.599032	-2.25364	0.0242191	0.359598	DPY19L2P2
ENSG00000036448	48.5352	0.839299	0.372482	2.25326	0.0242428	0.359702	MYOM2
ENSG00000122884	2231.39	0.55255	0.24527	2.25283	0.0242701	0.359729	P4HA1
ENSG00000066629	888.049	-0.393493	0.174717	-2.25217	0.0243114	0.359729	EML1
ENSG00000133665	93.9176	-0.653927	0.290293	-2.25265	0.0242814	0.359729	DYDC2
ENSG00000164627	39.466	-1.03861	0.46115	-2.25221	0.0243088	0.359729	KIF6
ENSG00000207137	2145.26	0.761985	0.338802	2.24906	0.0245088	0.3624	SNORD116-13
ENSG00000140939	38.8551	1.12634	0.501052	2.24796	0.0245789	0.363187	NOL3
ENSG00000005421	11.3416	-2.04445	0.909609	-2.24762	0.0246004	0.363257	PON1
ENSG00000226383	426.378	0.598573	0.266485	2.24617	0.0246928	0.364372	AC093375.1
ENSG00000172575	300.646	0.408953	0.182125	2.24545	0.024739	0.364384	RASGRP1
ENSG00000220472	192.137	-0.706507	0.31465	-2.24537	0.0247444	0.364384	RP11-69L16.5
ENSG00000254343	19.2284	1.30747	0.582271	2.24546	0.0247385	0.364384	RP11-760H22.2
ENSG00000111490	110.989	-0.578236	0.257559	-2.24506	0.0247643	0.364427	TBC1D30
ENSG00000183421	477.916	0.92291	0.411177	2.24456	0.0247966	0.364654	RIPK4
ENSG00000104783	23.8112	-0.958954	0.427298	-2.24423	0.0248176	0.364714	KCNN4
ENSG00000123146	136.249	-0.441547	0.196829	-2.2433	0.0248773	0.364845	ADGRE5
ENSG00000255568	55.1098	0.683238	0.304499	2.24381	0.0248448	0.364845	BRWD1-AS2
ENSG00000188512	24.6617	-1.35146	0.602372	-2.24356	0.0248609	0.364845	RP1-273G13.2
ENSG00000033867	11738.8	0.542513	0.241986	2.24191	0.0249669	0.365305	SLC4A7
ENSG00000175970	2632.87	-0.34703	0.154809	-2.24167	0.024983	0.365305	UNC119B
ENSG00000198933	296.365	-0.616335	0.274853	-2.24242	0.0249345	0.365305	TBKBP1
ENSG00000183145	52.4662	0.959448	0.428088	2.24124	0.0250105	0.365305	RIPPLY3
ENSG00000164037	28.6676	1.06804	0.476512	2.24137	0.0250024	0.365305	SLC9B1
ENSG00000234118	8.7287	-1.54749	0.690138	-2.24228	0.0249431	0.365305	RPL13AP6
ENSG00000213757	88.9072	-0.896314	0.400128	-2.24007	0.0250864	0.365671	CTC-451P13.1
ENSG00000149380	8.02941	-1.81053	0.808164	-2.2403	0.0250712	0.365671	P4HA3
ENSG00000228791	6.01583	1.78188	0.795377	2.2403	0.0250715	0.365671	THRB-AS1
ENSG00000270039	19.4463	-1.14499	0.511215	-2.23975	0.0251075	0.365731	RP11-571M6.17
ENSG00000100023	1090.24	-0.353766	0.15801	-2.23888	0.0251638	0.366197	PPIL2
ENSG00000163467	31.6946	-0.812563	0.362957	-2.23873	0.0251735	0.366197	TSACC
ENSG00000006007	2820.26	-0.377088	0.168512	-2.23775	0.0252372	0.366321	GDE1
ENSG00000076242	2352.54	-0.418161	0.186904	-2.2373	0.025267	0.366321	MLH1
ENSG00000134809	1114.43	0.495766	0.221503	2.23819	0.025209	0.366321	TIMM10
ENSG00000197020	1099.14	0.586086	0.261941	2.23747	0.0252554	0.366321	ZNF100
ENSG00000169220	777.976	0.785425	0.350995	2.23771	0.0252398	0.366321	RGS14
ENSG00000113368	9832.59	-0.336472	0.150463	-2.23625	0.0253355	0.366482	LMNB1
ENSG00000145604	3507.7	-0.44618	0.199542	-2.23603	0.0253501	0.366482	SKP2
ENSG00000052344	3193.65	0.398659	0.17832	2.23564	0.0253756	0.366482	PRSS8
ENSG00000268658	637.789	2.36185	1.05661	2.23531	0.0253972	0.366482	LINC00664
ENSG00000256663	52.5344	-0.804404	0.359787	-2.23578	0.0253664	0.366482	RP11-424C20.2
ENSG00000181418	22.3212	1.38277	0.618602	2.23532	0.0253963	0.366482	DDN
ENSG00000148655	13.8164	1.46516	0.655294	2.23589	0.0253591	0.366482	C10orf11
ENSG00000215256	324.424	0.55714	0.249284	2.23496	0.02542	0.366565	DHRS4-AS1
ENSG00000131473	25561.9	-0.333094	0.149127	-2.23363	0.0255075	0.366705	ACLY
ENSG00000129354	3949.87	0.3902	0.174692	2.23364	0.0255067	0.366705	AP1M2
ENSG00000096746	2891.68	0.526121	0.235693	2.23223	0.0255999	0.366705	HNRNPH3
ENSG00000085063	2347.47	0.379108	0.169665	2.23445	0.0254534	0.366705	CD59
ENSG00000100418	1684.77	-0.337219	0.151022	-2.23291	0.025555	0.366705	DESI1
ENSG00000277287	42.6926	0.814098	0.364629	2.23268	0.0255703	0.366705	RP4-794I6.4
ENSG00000176884	41.3249	0.897752	0.401907	2.23373	0.0255009	0.366705	GRIN1
ENSG00000205359	17.3781	1.10719	0.495908	2.23266	0.0255712	0.366705	SLCO6A1
ENSG00000270361	11.714	1.40515	0.629443	2.23238	0.0255901	0.366705	RP11-307C12.13
ENSG00000228217	10.7194	-1.4852	0.665156	-2.23286	0.0255584	0.366705	PNRC2P1
ENSG00000184117	8354.74	0.322015	0.14436	2.23064	0.0257049	0.366873	NIPSNAP1
ENSG00000172840	1986.45	0.446853	0.20036	2.23025	0.0257309	0.366873	PDP2
ENSG00000196839	760.626	0.394815	0.177015	2.23041	0.0257202	0.366873	ADA
ENSG00000120942	741.375	-0.398798	0.178717	-2.23145	0.0256516	0.366873	UBIAD1
ENSG00000168421	290.161	0.542467	0.243108	2.23138	0.0256558	0.366873	RHOH
ENSG00000121851	75.0998	0.703385	0.315364	2.23039	0.0257217	0.366873	POLR3GL
ENSG00000237361	9.86608	-1.57761	0.707215	-2.23073	0.0256988	0.366873	TUSC8
ENSG00000183022	19.725	-1.21507	0.544896	-2.22991	0.0257537	0.366956	TPM3P8
ENSG00000044090	1755.9	0.619288	0.277864	2.22875	0.0258308	0.367812	CUL7
ENSG00000205899	6.98899	-1.72821	0.776334	-2.22611	0.0260067	0.370071	BHLHA9
ENSG00000232258	10.5452	1.34886	0.606054	2.22564	0.026038	0.370272	TMEM114
ENSG00000178607	283.723	0.436249	0.196044	2.22526	0.0260639	0.370397	ERN1
ENSG00000168439	13689	-0.258498	0.116218	-2.22426	0.0261311	0.371008	STIP1
ENSG00000099812	17.5867	1.09771	0.493553	2.2241	0.0261414	0.371008	MISP
ENSG00000269425	13.4613	1.24143	0.558268	2.22371	0.0261678	0.371139	AC007292.7
ENSG00000173269	62.0192	-0.656085	0.295124	-2.22308	0.0262104	0.371498	MMRN2
ENSG00000187140	824.93	0.505727	0.227555	2.22244	0.0262538	0.371625	FOXD3
ENSG00000151611	279.255	0.528107	0.237599	2.22269	0.026237	0.371625	MMAA
ENSG00000260528	31.7531	0.898585	0.404649	2.22066	0.0263743	0.373085	FAM157C
ENSG00000171954	56.0257	1.44339	0.650212	2.21988	0.0264267	0.373581	CYP4F22
ENSG00000232445	1693.41	-0.458222	0.206502	-2.21898	0.0264883	0.373716	RP11-132A1.4
ENSG00000186976	43.0198	-0.88369	0.398203	-2.21919	0.0264736	0.373716	EFCAB6
ENSG00000105668	10.7631	1.7848	0.804182	2.21939	0.0264599	0.373716	UPK1A
ENSG00000207605	11.8151	1.38587	0.624795	2.21812	0.0265466	0.374294	MIR191
ENSG00000166938	1365.13	-0.549138	0.247678	-2.21714	0.0266132	0.374742	DIS3L
ENSG00000272086	143.82	-0.480482	0.216691	-2.21736	0.0265984	0.374742	CTD-2186M15.3
ENSG00000188730	70.6575	0.994509	0.448676	2.21654	0.0266543	0.375075	VWC2
ENSG00000168016	1448.99	0.494119	0.222989	2.21589	0.0266992	0.37522	TRANK1
ENSG00000187091	863.51	0.379899	0.171476	2.21546	0.0267283	0.37522	PLCD1
ENSG00000248008	244.032	-0.390262	0.176181	-2.21512	0.0267517	0.37522	NRAV
ENSG00000126583	191.517	0.53453	0.241294	2.21526	0.0267419	0.37522	PRKCG
ENSG00000106686	63.0959	0.585068	0.264052	2.21573	0.0267098	0.37522	SPATA6L
ENSG00000118160	186.98	0.794152	0.358678	2.21411	0.0268213	0.375952	SLC8A2
ENSG00000167193	3132.51	-0.340266	0.153862	-2.21151	0.0270009	0.377155	CRK
ENSG00000133639	1732.78	0.463664	0.209681	2.21128	0.0270166	0.377155	BTG1
ENSG00000147439	613.543	-0.365997	0.16554	-2.21093	0.0270405	0.377155	BIN3
ENSG00000172830	478.739	0.504937	0.228392	2.21084	0.0270472	0.377155	SSH3
ENSG00000187801	386.649	0.424145	0.191829	2.21106	0.0270317	0.377155	ZFP69B
ENSG00000165863	267.848	-0.529443	0.239397	-2.21157	0.0269963	0.377155	C10orf82
ENSG00000114698	131.568	0.631964	0.285657	2.21231	0.0269449	0.377155	PLSCR4
ENSG00000173404	66.6635	1.37749	0.622624	2.2124	0.026939	0.377155	INSM1
ENSG00000135801	1136.44	-0.288215	0.130423	-2.20986	0.027115	0.377612	TAF5L
ENSG00000254048	10.0595	-1.53302	0.693668	-2.21003	0.0271033	0.377612	RP11-328K2.1
ENSG00000112983	2413.94	-0.271797	0.123008	-2.20959	0.0271338	0.377629	BRD8
ENSG00000254893	25.8145	-1.01557	0.459721	-2.2091	0.0271674	0.377854	AC113404.1
ENSG00000184588	423.282	-0.814635	0.368908	-2.20823	0.027228	0.378452	PDE4B
ENSG00000166197	9011.39	-0.305742	0.13848	-2.20784	0.0272557	0.378592	NOLC1
ENSG00000227051	1629.57	-0.523129	0.236976	-2.20752	0.0272778	0.378655	C14orf132
ENSG00000100714	9955.86	-0.3163	0.143383	-2.20598	0.0273856	0.379547	MTHFD1
ENSG00000141219	1867.96	-0.326193	0.147877	-2.20584	0.0273949	0.379547	C17orf80
ENSG00000248668	29.2194	0.817801	0.370666	2.2063	0.0273627	0.379547	OXCT1-AS1
ENSG00000172663	330.477	0.428295	0.194193	2.20552	0.0274178	0.379621	TMEM134
ENSG00000139269	724.17	0.781692	0.354524	2.2049	0.0274609	0.379973	INHBE
ENSG00000108799	1233.15	0.436613	0.198208	2.20281	0.0276083	0.381523	EZH1
ENSG00000229931	23.6767	0.988094	0.448521	2.20301	0.0275943	0.381523	RP1-151F17.1
ENSG00000105186	4040.66	-0.287029	0.130445	-2.20039	0.0277792	0.381557	ANKRD27
ENSG00000124067	1476.57	0.398045	0.180899	2.20037	0.0277807	0.381557	SLC12A4
ENSG00000272168	1357.93	0.472728	0.214875	2.20002	0.0278056	0.381557	CASC15
ENSG00000179899	1215.39	-0.489125	0.222264	-2.20065	0.0277609	0.381557	PHC1P1
ENSG00000083828	626.565	-0.291542	0.132433	-2.20143	0.0277058	0.381557	ZNF586
ENSG00000196967	437.977	0.649257	0.294971	2.20108	0.02773	0.381557	ZNF585A
ENSG00000178935	365.522	-0.434962	0.197493	-2.20242	0.027636	0.381557	ZNF552
ENSG00000197429	292.633	0.547283	0.248584	2.2016	0.0276935	0.381557	IPP
ENSG00000100100	162.149	0.727224	0.330507	2.20033	0.0277836	0.381557	PIK3IP1
ENSG00000128016	141.206	0.701648	0.318738	2.20133	0.0277129	0.381557	ZFP36
ENSG00000244479	122.535	-0.696199	0.316443	-2.20007	0.0278016	0.381557	OR2A1-AS1
ENSG00000197044	155.41	0.863329	0.392647	2.19874	0.0278965	0.38256	ZNF441
ENSG00000173812	3943.36	0.327035	0.148799	2.19783	0.0279614	0.382614	EIF1
ENSG00000273008	23.9058	0.895356	0.407454	2.19744	0.0279888	0.382614	RP11-351D16.3
ENSG00000126467	18.6286	1.12547	0.512175	2.19744	0.0279893	0.382614	TSKS
ENSG00000261302	9.21752	1.47056	0.66917	2.19759	0.0279782	0.382614	RP11-343H19.1
ENSG00000248610	6.05248	-2.00979	0.914348	-2.19805	0.0279454	0.382614	HSPA8P4
ENSG00000075856	6049.99	-0.272883	0.124365	-2.19421	0.0282206	0.38262	SART3
ENSG00000158966	3547.1	-0.331073	0.150805	-2.19537	0.0281371	0.38262	CACHD1
ENSG00000250366	2121.99	0.373903	0.170346	2.19496	0.0281664	0.38262	TUNAR
ENSG00000119280	1934.83	-0.352469	0.160494	-2.19615	0.0280812	0.38262	C1orf198
ENSG00000234444	1310.86	2.01591	0.918207	2.19548	0.0281292	0.38262	ZNF736
ENSG00000103811	778.172	0.356642	0.162374	2.19642	0.0280618	0.38262	CTSH
ENSG00000253190	683.308	-0.837388	0.381166	-2.19691	0.0280269	0.38262	AC084082.3
ENSG00000153832	360.651	0.418227	0.190365	2.19697	0.0280225	0.38262	FBXO36
ENSG00000082014	145.519	0.783499	0.356811	2.19584	0.0281035	0.38262	SMARCD3
ENSG00000240668	30.1652	-0.963054	0.438868	-2.19441	0.0282062	0.38262	KRT8P36
ENSG00000166292	28.1694	-1.12237	0.511484	-2.19434	0.0282109	0.38262	TMEM100
ENSG00000174912	27.7041	-1.28174	0.584017	-2.1947	0.0281851	0.38262	METTL15P1
ENSG00000251138	9.11215	1.48027	0.674422	2.19488	0.0281724	0.38262	RP11-81H3.2
ENSG00000087263	2154.17	-0.339451	0.154732	-2.19381	0.0282493	0.382769	OGFOD1
ENSG00000166598	29759.1	-0.615421	0.280672	-2.19267	0.0283311	0.383395	HSP90B1
ENSG00000231784	40.2107	0.707053	0.322433	2.19287	0.0283166	0.383395	DBIL5P
ENSG00000274376	17.1344	1.46323	0.667425	2.19236	0.0283538	0.383461	ADAMTS7P1
ENSG00000197713	2830.53	-0.598947	0.273335	-2.19126	0.0284333	0.383909	RPE
ENSG00000166261	1428.96	-0.340369	0.155326	-2.19132	0.0284288	0.383909	ZNF202
ENSG00000179979	48.3184	0.866648	0.39552	2.19116	0.0284403	0.383909	CRIPAK
ENSG00000256576	24.6011	0.854743	0.390135	2.19089	0.0284599	0.383932	RP13-977J11.2
ENSG00000010810	3392.28	-0.422017	0.192672	-2.19034	0.0284998	0.383989	FYN
ENSG00000252906	70.2355	0.768562	0.350871	2.19044	0.0284922	0.383989	SCARNA3
ENSG00000080546	1098.62	0.45902	0.209652	2.18944	0.028565	0.384627	SESN1
ENSG00000275763	13.8637	1.26749	0.578989	2.18914	0.0285864	0.384675	C18orf65
ENSG00000242265	7839.18	0.720075	0.329023	2.18852	0.0286314	0.385041	PEG10
ENSG00000185404	48.4015	1.12419	0.513815	2.18794	0.0286741	0.385375	SP140L
ENSG00000175600	216.886	0.513866	0.234938	2.18724	0.0287249	0.385816	SUGCT
ENSG00000166788	1575.76	-0.425761	0.194866	-2.18489	0.0288968	0.387641	SAAL1
ENSG00000124613	442.446	0.492849	0.225563	2.18497	0.0288908	0.387641	ZNF391
ENSG00000108312	4341.44	-0.336627	0.154116	-2.18424	0.0289445	0.388041	UBTF
ENSG00000113739	2723.05	0.543189	0.248746	2.18371	0.0289834	0.388078	STC2
ENSG00000261437	56.2498	0.652718	0.298897	2.18375	0.0289805	0.388078	RP11-22C11.2
ENSG00000116199	3792.91	0.292464	0.134068	2.18145	0.02915	0.389016	FAM20B
ENSG00000132109	598.699	-0.349364	0.160123	-2.18185	0.0291203	0.389016	TRIM21
ENSG00000187775	51.1254	-0.861614	0.39483	-2.18224	0.0290916	0.389016	DNAH17
ENSG00000197406	36.6949	1.14996	0.527194	2.18129	0.0291618	0.389016	DIO3
ENSG00000235082	21.9488	-1.18638	0.543854	-2.18142	0.029152	0.389016	SUMO1P3
ENSG00000201785	18.715	1.12164	0.514011	2.18213	0.0291	0.389016	SNORD117
ENSG00000050438	777.369	0.615434	0.282205	2.1808	0.029198	0.389259	SLC4A8
ENSG00000177963	2255.13	-0.36652	0.168095	-2.18044	0.0292248	0.389374	RIC8A
ENSG00000157379	243.985	0.477493	0.219091	2.17942	0.0293003	0.390139	DHRS1
ENSG00000118816	6704.53	0.381818	0.175536	2.17515	0.0296186	0.390711	CCNI
ENSG00000101191	5224.35	-0.378112	0.173815	-2.17537	0.0296027	0.390711	DIDO1
ENSG00000188848	3322.61	0.466143	0.214107	2.17715	0.0294694	0.390711	BEND4
ENSG00000106211	1782.51	0.404237	0.185574	2.17831	0.0293831	0.390711	HSPB1
ENSG00000143545	1433.23	-0.418758	0.192486	-2.17553	0.0295905	0.390711	RAB13
ENSG00000197989	937.618	-0.36761	0.168773	-2.17813	0.0293961	0.390711	SNHG12
ENSG00000173482	591.816	0.628292	0.288657	2.1766	0.0295101	0.390711	PTPRM
ENSG00000124357	586.477	-0.350156	0.16098	-2.17515	0.029619	0.390711	NAGK
ENSG00000189362	384.892	0.468221	0.215275	2.17499	0.0296312	0.390711	NEMP2
ENSG00000275198	50.5869	0.732169	0.336525	2.17568	0.0295795	0.390711	RP11-471B22.3
ENSG00000187098	45.0446	-0.843424	0.387519	-2.17647	0.0295199	0.390711	MITF
ENSG00000259448	27.4346	1.06424	0.488776	2.17736	0.0294538	0.390711	RP11-16E12.1
ENSG00000213376	21.1551	-1.10804	0.509025	-2.1768	0.0294958	0.390711	GAPDHP71
ENSG00000229586	15.6785	-1.23406	0.567396	-2.17496	0.0296334	0.390711	TNPO1P3
ENSG00000112319	11.6211	1.37119	0.630073	2.17625	0.0295369	0.390711	EYA4
ENSG00000122585	8.02769	-1.69146	0.777646	-2.17511	0.0296222	0.390711	NPY
ENSG00000172818	189.265	1.12155	0.515936	2.17382	0.0297189	0.391599	OVOL1
ENSG00000136040	141.173	-0.739333	0.340208	-2.17318	0.0297669	0.391793	PLXNC1
ENSG00000259045	8.8249	-2.15119	0.989901	-2.17314	0.02977	0.391793	MTCO1P2
ENSG00000207093	235.919	0.744007	0.342498	2.1723	0.0298332	0.391986	SNORD116-8
ENSG00000276115	40.8198	0.759366	0.349581	2.17222	0.0298393	0.391986	RP11-817I4.2
ENSG00000233178	19.5696	-1.70796	0.786192	-2.17244	0.0298225	0.391986	RP11-88I18.2
ENSG00000139178	580.654	0.57198	0.26338	2.17169	0.029879	0.392014	C1RL
ENSG00000163344	346.241	0.441587	0.203344	2.17162	0.0298842	0.392014	PMVK
ENSG00000132031	147.004	0.542796	0.249967	2.17147	0.029896	0.392014	MATN3
ENSG00000104044	31.9254	-0.86743	0.399559	-2.17097	0.0299337	0.39227	OCA2
ENSG00000151881	242.333	0.59008	0.271875	2.17041	0.029976	0.392586	TMEM267
ENSG00000173473	18578.5	-0.294778	0.135853	-2.16982	0.0300204	0.392927	SMARCC1
ENSG00000163481	574.711	-0.376937	0.173758	-2.16932	0.0300581	0.393182	RNF25
ENSG00000113048	5379.3	-0.311729	0.143759	-2.16842	0.0301269	0.393356	MRPS27
ENSG00000064763	1189.19	-0.634776	0.292727	-2.16849	0.0301212	0.393356	FAR2
ENSG00000143248	974.71	-0.969439	0.447183	-2.16788	0.0301677	0.393356	RGS5
ENSG00000148204	139.573	-1.28158	0.591098	-2.16813	0.0301489	0.393356	CRB2
ENSG00000079385	34.9699	0.983927	0.45383	2.16805	0.0301545	0.393356	CEACAM1
ENSG00000273145	25.1639	0.906084	0.417992	2.16771	0.0301809	0.393356	CITF22-92A6.1
ENSG00000167526	44273.3	0.367336	0.169631	2.1655	0.0303493	0.3938	RPL13
ENSG00000204590	2283.61	-0.309777	0.143029	-2.16583	0.0303239	0.3938	GNL1
ENSG00000181513	406.825	0.458283	0.211583	2.16597	0.0303133	0.3938	ACBD4
ENSG00000224717	132.508	-0.716325	0.330784	-2.16554	0.0303467	0.3938	RP11-576D8.4
ENSG00000152580	102.093	-0.750042	0.34613	-2.16694	0.0302394	0.3938	IGSF10
ENSG00000204194	37.1596	-0.91246	0.421206	-2.16631	0.0302879	0.3938	RPL12P1
ENSG00000248873	29.035	-0.898971	0.415163	-2.16535	0.0303612	0.3938	SERBP1P6
ENSG00000180318	27.7503	1.12917	0.521394	2.16566	0.0303368	0.3938	ALX1
ENSG00000130433	73.842	0.60572	0.279788	2.16492	0.0303935	0.393981	CACNG6
ENSG00000120705	9960.06	-0.374821	0.173201	-2.16408	0.0304581	0.39441	ETF1
ENSG00000170619	469.191	-0.370818	0.171356	-2.16402	0.0304631	0.39441	COMMD5
ENSG00000172318	1639.23	-0.355679	0.164498	-2.16221	0.0306022	0.395498	B3GALT1
ENSG00000204472	99.3995	-0.725998	0.335741	-2.16238	0.0305892	0.395498	AIF1
ENSG00000234498	56.3221	-0.77737	0.35946	-2.16261	0.0305714	0.395498	RPL13AP20
ENSG00000213866	156.763	-0.658302	0.304518	-2.16178	0.030635	0.395683	YBX1P10
ENSG00000226091	83.2403	0.743774	0.344133	2.1613	0.0306723	0.395928	LINC00937
ENSG00000178096	246.974	0.386139	0.178719	2.16059	0.030727	0.395973	BOLA1
ENSG00000197019	216.122	0.460811	0.213249	2.16091	0.0307025	0.395973	SERTAD1
ENSG00000170231	125.488	0.456296	0.211195	2.16054	0.0307309	0.395973	FABP6
ENSG00000267057	14.6762	1.13005	0.523114	2.16024	0.030754	0.396033	RP11-456O19.2
ENSG00000065183	4691.6	-0.405204	0.18768	-2.15902	0.0308485	0.396303	WDR3
ENSG00000148297	2045.7	-0.357203	0.165437	-2.15915	0.0308387	0.396303	MED22
ENSG00000281398	919.612	-0.559126	0.258939	-2.1593	0.0308273	0.396303	SNHG4
ENSG00000249210	38.0929	-0.870209	0.403038	-2.15912	0.0308406	0.396303	GAPDHP38
ENSG00000187189	921.905	-0.344696	0.159673	-2.15876	0.0308687	0.396327	TSPYL4
ENSG00000280036	17.3728	1.04679	0.485041	2.15816	0.0309154	0.39669	RP11-540O11.8
ENSG00000166508	16808.8	-0.262085	0.121506	-2.15698	0.0310074	0.397306	MCM7
ENSG00000141098	1107.43	-0.367832	0.170565	-2.15655	0.0310411	0.397306	GFOD2
ENSG00000049239	912.944	0.784078	0.363599	2.15644	0.0310497	0.397306	H6PD
ENSG00000140650	839.839	-0.305525	0.141686	-2.15636	0.0310557	0.397306	PMM2
ENSG00000179832	756.873	0.48587	0.225266	2.15687	0.0310159	0.397306	MROH1
ENSG00000151470	173.398	0.745838	0.345927	2.15606	0.0310791	0.39737	C4orf33
ENSG00000166750	846.205	-0.474437	0.220188	-2.15469	0.031186	0.398264	SLFN5
ENSG00000171223	263.132	0.518403	0.240588	2.15474	0.0311824	0.398264	JUNB
ENSG00000135926	1144.15	0.592682	0.275359	2.1524	0.0313658	0.398383	TMBIM1
ENSG00000204149	326.817	-0.446535	0.207473	-2.15225	0.0313775	0.398383	AGAP6
ENSG00000277053	229.051	-0.653076	0.303443	-2.15222	0.0313802	0.398383	GTF2IP1
ENSG00000143382	124.349	0.539768	0.250647	2.1535	0.0312795	0.398383	ADAMTSL4
ENSG00000148948	94.6693	-0.851801	0.395699	-2.15265	0.0313462	0.398383	LRRC4C
ENSG00000210117	73.4388	0.685236	0.318292	2.15285	0.0313302	0.398383	MT-TW
ENSG00000213885	54.7205	-0.736781	0.342155	-2.15336	0.0312907	0.398383	RPL13AP7
ENSG00000129538	19.4904	-1.35356	0.628405	-2.15397	0.0312429	0.398383	RNASE1
ENSG00000250222	15.0666	1.19069	0.553155	2.15254	0.0313552	0.398383	CTC-338M12.5
ENSG00000171189	5.93026	-2.19629	1.02015	-2.15291	0.0313254	0.398383	GRIK1
ENSG00000139344	16.034	-1.38989	0.645939	-2.15174	0.0314176	0.398622	AMDHD1
ENSG00000141556	4056.47	0.457828	0.21284	2.15105	0.0314724	0.399082	TBCD
ENSG00000160789	1397.79	-0.32836	0.152744	-2.14973	0.0315764	0.400166	LMNA
ENSG00000172578	16.0039	1.12013	0.521217	2.14906	0.0316298	0.400607	KLHL6
ENSG00000265100	20.6129	0.952908	0.443538	2.14842	0.0316802	0.401009	RP11-147L13.2
ENSG00000109113	4562.44	-0.339934	0.158339	-2.14687	0.0318033	0.401153	RAB34
ENSG00000207263	378.549	0.792355	0.369053	2.147	0.0317935	0.401153	SNORD116-16
ENSG00000173409	335.859	-0.543809	0.253226	-2.14753	0.0317513	0.401153	ARV1
ENSG00000184254	271.354	0.821943	0.382745	2.14749	0.0317541	0.401153	ALDH1A3
ENSG00000129244	223.918	0.817138	0.380548	2.14727	0.0317722	0.401153	ATP1B2
ENSG00000095713	28.3526	0.897362	0.417874	2.14745	0.0317576	0.401153	CRTAC1
ENSG00000227355	17.84	1.02864	0.479192	2.14661	0.0318245	0.401186	RP11-162D16.2
ENSG00000177595	657.825	0.504679	0.235306	2.14478	0.0319704	0.402084	PIDD1
ENSG00000231167	57.1743	-0.894065	0.416849	-2.14482	0.0319674	0.402084	YBX1P2
ENSG00000226453	10.5764	1.63827	0.76369	2.14521	0.0319362	0.402084	RP11-379B8.1
ENSG00000177989	6.46386	1.70934	0.796777	2.14532	0.0319275	0.402084	ODF3B
ENSG00000168356	26.1312	-0.823536	0.384078	-2.14419	0.0320175	0.402441	SCN11A
ENSG00000170190	569.016	0.448679	0.20937	2.143	0.0321133	0.40294	SLC16A5
ENSG00000177855	40.6613	-0.782783	0.365199	-2.14344	0.0320776	0.40294	CACYBPP2
ENSG00000175356	32.1715	1.0147	0.473473	2.1431	0.0321051	0.40294	SCUBE2
ENSG00000164181	489.371	0.598607	0.279518	2.14157	0.0322282	0.404147	ELOVL7
ENSG00000185507	286.328	0.410303	0.191733	2.13997	0.0323572	0.405528	IRF7
ENSG00000006453	1761.65	0.354184	0.16555	2.13944	0.0324	0.405568	BAIAP2L1
ENSG00000270246	984.322	0.712952	0.333492	2.13784	0.0325298	0.405568	RP11-701H24.8
ENSG00000213976	428.453	-0.915739	0.427977	-2.13969	0.0323795	0.405568	CTD-2561J22.2
ENSG00000252835	343.797	0.774935	0.362435	2.13814	0.0325057	0.405568	SCARNA21
ENSG00000196151	267.884	0.531152	0.248379	2.13847	0.0324788	0.405568	WDSUB1
ENSG00000112562	211.336	-0.689952	0.322582	-2.13884	0.0324485	0.405568	SMOC2
ENSG00000158445	140.887	0.762481	0.356656	2.13786	0.0325282	0.405568	KCNB1
ENSG00000253982	137.583	0.655861	0.306635	2.1389	0.0324441	0.405568	CTD-2336O2.1
ENSG00000151876	58.7776	0.703183	0.32892	2.13785	0.0325288	0.405568	FBXO4
ENSG00000279584	10.3325	1.32943	0.622202	2.13665	0.0326261	0.406533	AC005593.2
ENSG00000118894	944.126	-0.386764	0.181064	-2.13606	0.0326742	0.406662	EEF2KMT
ENSG00000240032	15.2301	-1.29113	0.604417	-2.13616	0.0326667	0.406662	RP11-274H2.3
ENSG00000105700	3314.42	0.331496	0.155301	2.13453	0.032799	0.40798	KXD1
ENSG00000085552	568.046	-0.604575	0.283419	-2.13315	0.0329126	0.409157	IGSF9
ENSG00000158773	1999.7	-0.334097	0.15671	-2.13194	0.0330116	0.409679	USF1
ENSG00000238083	164.183	-0.612352	0.28721	-2.13207	0.0330008	0.409679	LRRC37A2
ENSG00000232883	10.3396	-1.46312	0.686213	-2.13217	0.032993	0.409679	RP11-302I18.1
ENSG00000138032	3838.74	0.349756	0.164082	2.13159	0.0330402	0.40977	PPM1B
ENSG00000148158	2333.57	0.475233	0.223053	2.13059	0.0331233	0.40977	SNX30
ENSG00000168286	1737.28	-0.351257	0.164873	-2.13047	0.0331331	0.40977	THAP11
ENSG00000100031	313.885	0.494398	0.232046	2.1306	0.0331219	0.40977	GGT1
ENSG00000231312	186.001	0.652754	0.306295	2.13113	0.0330785	0.40977	AC007246.3
ENSG00000272654	67.9505	0.613768	0.288087	2.13049	0.0331311	0.40977	RP11-422P24.11
ENSG00000163468	23272.8	-0.297317	0.139713	-2.12806	0.0333322	0.410113	CCT3
ENSG00000137573	1525.37	0.682912	0.32072	2.12931	0.0332288	0.410113	SULF1
ENSG00000132406	580.78	0.52903	0.248522	2.1287	0.0332789	0.410113	TMEM128
ENSG00000110011	248.03	0.563727	0.264712	2.12959	0.0332058	0.410113	DNAJC4
ENSG00000154721	211.46	-0.527959	0.248047	-2.12846	0.0332986	0.410113	JAM2
ENSG00000135253	108.519	-0.923882	0.434143	-2.12806	0.0333319	0.410113	KCP
ENSG00000261121	25.74	-1.00254	0.471101	-2.12809	0.0333299	0.410113	RP11-496D24.2
ENSG00000279716	23.5086	-1.51135	0.709795	-2.12928	0.0332315	0.410113	AC006128.2
ENSG00000275383	10.6634	1.63989	0.770513	2.12831	0.0333112	0.410113	RP11-615I2.6
ENSG00000267321	282.373	-0.485028	0.228062	-2.12674	0.0334414	0.410515	RP11-1094M14.11
ENSG00000259203	195.837	0.733076	0.34467	2.1269	0.0334288	0.410515	RP11-209K10.2
ENSG00000099994	78.0482	-1.17952	0.554479	-2.12726	0.0333983	0.410515	SUSD2
ENSG00000249087	51.9315	0.804152	0.37812	2.12671	0.033444	0.410515	ZNF436-AS1
ENSG00000225030	8.01626	-1.58884	0.747157	-2.12652	0.0334601	0.410515	RP4-784A16.3
ENSG00000173545	1221.78	-0.343346	0.161493	-2.12607	0.0334975	0.41074	ZNF622
ENSG00000282164	28.4035	1.40224	0.659635	2.12578	0.0335214	0.4108	PEG13
ENSG00000139354	1147.99	0.455808	0.214462	2.12536	0.033557	0.411001	GAS2L3
ENSG00000147813	950.886	0.413981	0.194846	2.12466	0.033615	0.411478	NAPRT
ENSG00000114473	365.3	-0.409004	0.192575	-2.12387	0.0336808	0.41205	IQCG
ENSG00000137936	651.392	0.503795	0.237232	2.12364	0.0337001	0.412052	BCAR3
ENSG00000144485	924.352	0.55153	0.259814	2.12278	0.033772	0.412463	HES6
ENSG00000105472	170.125	0.445004	0.209631	2.12279	0.0337712	0.412463	CLEC11A
ENSG00000103489	1711.33	-0.42338	0.199499	-2.12221	0.0338201	0.412816	XYLT1
ENSG00000186642	225.201	0.597349	0.281558	2.12159	0.0338725	0.413222	PDE2A
ENSG00000140368	39.3663	-0.770472	0.363201	-2.12134	0.0338933	0.413241	PSTPIP1
ENSG00000240776	29.5346	-0.999067	0.471172	-2.12039	0.0339735	0.413985	RP11-435F17.1
ENSG00000233593	47.0668	1.01682	0.479611	2.12009	0.0339989	0.41406	RP4-665J23.1
ENSG00000046604	6374.76	-0.381766	0.18016	-2.11904	0.034087	0.414613	DSG2
ENSG00000179262	2478.93	0.403036	0.190229	2.11869	0.034117	0.414613	RAD23A
ENSG00000143633	365.508	-0.380896	0.179751	-2.11902	0.0340884	0.414613	C1orf131
ENSG00000183914	47.2354	0.748132	0.35312	2.11864	0.0341212	0.414613	DNAH2
ENSG00000059691	817.221	-0.294573	0.139066	-2.11822	0.0341562	0.414803	GATB
ENSG00000230832	40.9643	0.754834	0.356396	2.11796	0.0341782	0.414836	RP11-325P15.2
ENSG00000139579	1367.46	-0.332731	0.157137	-2.11746	0.0342207	0.415119	NABP2
ENSG00000160688	2798.52	-0.334048	0.157787	-2.11708	0.034253	0.415277	FLAD1
ENSG00000207133	1512.15	0.787262	0.372037	2.11609	0.0343374	0.415365	SNORD116-7
ENSG00000101350	1299.47	-0.478685	0.226211	-2.1161	0.0343362	0.415365	KIF3B
ENSG00000137103	351.218	0.647738	0.30603	2.11658	0.0342955	0.415365	TMEM8B
ENSG00000213942	38.4477	-1.00255	0.473753	-2.11618	0.0343293	0.415365	RP1-102E24.1
ENSG00000245498	118.837	0.499671	0.23617	2.11573	0.0343678	0.415499	RP11-677M14.7
ENSG00000128191	1910.24	-0.35537	0.168	-2.1153	0.0344048	0.415713	DGCR8
ENSG00000189241	3590.55	-0.347327	0.164236	-2.1148	0.0344469	0.415852	TSPYL1
ENSG00000129103	2196.81	0.332862	0.157437	2.11426	0.0344931	0.415852	SUMF2
ENSG00000198822	251.137	-0.683755	0.323575	-2.11313	0.03459	0.415852	GRM3
ENSG00000165633	128.837	-0.572108	0.2707	-2.11344	0.0345628	0.415852	VSTM4
ENSG00000156427	39.2959	0.862711	0.408233	2.11328	0.0345767	0.415852	FGF18
ENSG00000227115	22.7678	-1.05366	0.498258	-2.11469	0.0344564	0.415852	LINC01630
ENSG00000248966	17.7518	-1.13955	0.538985	-2.11424	0.0344944	0.415852	BCLAF1P1
ENSG00000182256	12.4896	-1.21227	0.57364	-2.11329	0.0345757	0.415852	GABRG3
ENSG00000137203	9.85867	1.9896	0.941492	2.11324	0.0345804	0.415852	TFAP2A
ENSG00000105676	2385.08	-0.324263	0.153701	-2.1097	0.0348845	0.417529	ARMC6
ENSG00000219481	529.577	0.431301	0.204354	2.11055	0.0348107	0.417529	NBPF1
ENSG00000120645	145.633	-0.772067	0.365703	-2.11118	0.0347566	0.417529	IQSEC3
ENSG00000270362	81.6179	0.543571	0.257654	2.1097	0.0348844	0.417529	HMGN3-AS1
ENSG00000232228	16.6011	-1.23527	0.585497	-2.10978	0.0348772	0.417529	RP11-77O7.1
ENSG00000206899	14.3178	1.32754	0.629221	2.10982	0.0348743	0.417529	RNU6-36P
ENSG00000173338	9.43584	1.4502	0.687334	2.1099	0.0348671	0.417529	KCNK7
ENSG00000126500	6.2913	2.11602	1.00286	2.10999	0.0348592	0.417529	FLRT1
ENSG00000197813	22.9469	1.03701	0.491671	2.10915	0.0349314	0.417858	CTC-301O7.4
ENSG00000224557	983.864	0.325755	0.154511	2.1083	0.0350054	0.418279	HLA-DPB2
ENSG00000180229	780.939	-0.928079	0.440172	-2.10845	0.0349925	0.418279	HERC2P3
ENSG00000187123	624.852	-0.526711	0.249876	-2.10789	0.0350403	0.418458	LYPD6
ENSG00000279948	40.2511	-0.802845	0.380915	-2.10767	0.0350593	0.418458	CTD-2233K9.1
ENSG00000234664	111.27	-0.446708	0.211997	-2.10715	0.0351048	0.418769	HMGN2P5
ENSG00000223473	107.099	0.489407	0.232371	2.10614	0.0351921	0.419578	GS1-124K5.3
ENSG00000253716	131.702	0.618576	0.293769	2.10566	0.0352341	0.419847	MINCR
ENSG00000124193	5253.76	-0.411626	0.195712	-2.10322	0.0354463	0.420157	SRSF6
ENSG00000171720	2861.85	-0.29665	0.140983	-2.10415	0.0353654	0.420157	HDAC3
ENSG00000246705	928.322	0.545629	0.259465	2.1029	0.0354747	0.420157	H2AFJ
ENSG00000197857	325.413	0.46267	0.219912	2.10389	0.035388	0.420157	ZNF44
ENSG00000214050	283.188	0.426603	0.202764	2.10394	0.0353835	0.420157	FBXO16
ENSG00000173535	167.254	0.59133	0.281187	2.10298	0.0354675	0.420157	TNFRSF10C
ENSG00000243477	116.36	0.594132	0.282471	2.10334	0.0354361	0.420157	NAT6
ENSG00000237087	93.9491	2.09966	0.998279	2.10328	0.0354413	0.420157	AC068134.6
ENSG00000256139	33.6829	0.923492	0.439149	2.10291	0.0354733	0.420157	RP11-968O1.5
ENSG00000276727	11.9289	1.23837	0.588323	2.10492	0.035298	0.420157	RP11-123K3.9
ENSG00000227012	6.03534	-3.13263	1.48853	-2.1045	0.0353345	0.420157	RP1-97J1.2
ENSG00000116957	1482.23	-0.38332	0.182349	-2.10212	0.0355423	0.420416	TBCE
ENSG00000093009	1010.04	-0.451656	0.214856	-2.10213	0.0355418	0.420416	CDC45
ENSG00000110975	114.865	-0.805499	0.383209	-2.10198	0.035555	0.420416	SYT10
ENSG00000061987	2324.57	0.333117	0.158562	2.10086	0.0356534	0.420976	MON2
ENSG00000174607	1802.51	0.536963	0.25563	2.10055	0.0356806	0.420976	UGT8
ENSG00000106305	1782.13	-0.368324	0.175295	-2.10116	0.0356267	0.420976	AIMP2
ENSG00000248874	18.4287	8.21019	3.90845	2.10063	0.0356737	0.420976	C5orf17
ENSG00000206688	3060.58	0.721411	0.343485	2.10027	0.0357051	0.421035	SNORD116-18
ENSG00000172009	2963.44	-0.357049	0.170023	-2.10001	0.0357282	0.421077	THOP1
ENSG00000103740	170.138	-0.512629	0.244145	-2.09969	0.0357558	0.421172	ACSBG1
ENSG00000139624	1259.74	-0.303109	0.144384	-2.09932	0.0357886	0.421327	CERS5
ENSG00000124459	881.762	-0.448426	0.213713	-2.09826	0.0358819	0.422196	ZNF45
ENSG00000113391	887.792	0.424432	0.20239	2.0971	0.0359847	0.423174	FAM172A
ENSG00000221883	46.9807	0.683523	0.326186	2.0955	0.0361263	0.424607	ARIH2OS
ENSG00000178814	937.783	0.574734	0.274431	2.09428	0.0362352	0.424931	OPLAH
ENSG00000187118	599.255	0.399204	0.190634	2.09408	0.0362525	0.424931	CMC1
ENSG00000121716	245.54	-0.445741	0.212843	-2.09422	0.0362404	0.424931	PILRB
ENSG00000260804	209.854	-0.407381	0.194506	-2.09444	0.0362209	0.424931	PKI55
ENSG00000279674	43.3481	-0.904959	0.43202	-2.09472	0.0361962	0.424931	RP11-1086I4.2
ENSG00000157557	2186.54	0.688207	0.328707	2.09368	0.0362884	0.425022	ETS2
ENSG00000272769	15.5374	1.02276	0.48853	2.09355	0.0362997	0.425022	RP11-725P16.2
ENSG00000121440	874.932	-0.597881	0.285683	-2.09281	0.0363658	0.425112	PDZRN3
ENSG00000280129	49.8896	0.817654	0.39073	2.09263	0.036382	0.425112	RP11-298I3.3
ENSG00000210107	34.371	0.741868	0.354432	2.09312	0.0363385	0.425112	MT-TQ
ENSG00000127249	8.50924	1.44061	0.688436	2.09258	0.0363863	0.425112	ATP13A4
ENSG00000143502	241.912	-0.776734	0.371356	-2.09161	0.0364731	0.425522	SUSD4
ENSG00000233922	166.121	-0.606835	0.290148	-2.09146	0.0364865	0.425522	AL133493.2
ENSG00000248632	101.83	1.04828	0.501253	2.09131	0.0365004	0.425522	RP11-366M4.11
ENSG00000105647	6.99581	-1.6794	0.802863	-2.09177	0.0364595	0.425522	PIK3R2
ENSG00000138802	1948.32	0.329441	0.157623	2.09006	0.0366128	0.425681	SEC24B
ENSG00000145979	929.831	0.313987	0.150224	2.09013	0.0366065	0.425681	TBC1D7
ENSG00000229638	476.718	-0.504062	0.241144	-2.0903	0.036591	0.425681	RPL4P4
ENSG00000160345	159.566	-0.520377	0.248894	-2.09076	0.03655	0.425681	C9orf116
ENSG00000227953	34.6051	-0.759639	0.36341	-2.09031	0.0365899	0.425681	LINC01341
ENSG00000131153	1940.84	-0.446289	0.213557	-2.08979	0.0366368	0.425729	GINS2
ENSG00000204713	4064.26	-0.276732	0.132451	-2.08932	0.0366792	0.425993	TRIM27
ENSG00000096060	2681.78	-0.374829	0.179443	-2.08885	0.0367215	0.426025	FKBP5
ENSG00000183778	1676.62	0.596114	0.285364	2.08896	0.0367112	0.426025	B3GALT5
ENSG00000244485	8.19884	-1.76256	0.844268	-2.08768	0.0368264	0.427012	RPL18P13
ENSG00000245060	153.668	0.407581	0.195314	2.0868	0.036906	0.427705	LINC00847
ENSG00000175602	1214.18	0.395256	0.189452	2.08631	0.0369503	0.427988	CCDC85B
ENSG00000196569	562.125	0.660544	0.316891	2.08445	0.0371192	0.429209	LAMA2
ENSG00000135750	508.35	0.533125	0.255774	2.08436	0.0371273	0.429209	KCNK1
ENSG00000237491	101.224	0.536041	0.25715	2.08454	0.0371108	0.429209	RP11-206L10.9
ENSG00000167646	38.0741	-0.764571	0.366843	-2.08419	0.0371428	0.429209	DNAAF3
ENSG00000213864	14.2271	-1.22769	0.589086	-2.08405	0.0371553	0.429209	EEF1B2P2
ENSG00000274012	1.0135e+06	0.615782	0.295901	2.08104	0.0374302	0.429345	RN7SL2
ENSG00000143799	28244.6	-0.252813	0.121344	-2.08344	0.0372114	0.429345	PARP1
ENSG00000089737	7467.04	-0.300554	0.144432	-2.08094	0.0374392	0.429345	DDX24
ENSG00000125753	6134.03	-0.34289	0.164619	-2.08294	0.0372571	0.429345	VASP
ENSG00000141524	2156.68	-0.389859	0.187223	-2.08232	0.0373131	0.429345	TMC6
ENSG00000140511	1781.82	-0.375349	0.180301	-2.08179	0.0373618	0.429345	HAPLN3
ENSG00000130766	1461.35	0.481229	0.231288	2.08065	0.0374661	0.429345	SESN2
ENSG00000125877	962.714	-0.373654	0.179359	-2.08327	0.0372269	0.429345	ITPA
ENSG00000166963	176.901	-0.666862	0.320313	-2.08191	0.0373506	0.429345	MAP1A
ENSG00000196139	150.085	-0.721832	0.346865	-2.08101	0.0374327	0.429345	AKR1C3
ENSG00000118946	80.8491	0.614309	0.295137	2.08144	0.037394	0.429345	PCDH17
ENSG00000008226	46.9746	-0.675896	0.324825	-2.0808	0.0374524	0.429345	DLEC1
ENSG00000253210	33.6529	0.738458	0.354506	2.08306	0.0372454	0.429345	RP11-809O17.1
ENSG00000251661	23.1628	0.943711	0.453221	2.08223	0.0373211	0.429345	RP11-326C3.11
ENSG00000229848	9.95986	1.33649	0.641815	2.08235	0.0373102	0.429345	RP13-766D20.2
ENSG00000138101	1405.69	0.373786	0.179749	2.07949	0.0375722	0.429648	DTNB
ENSG00000089876	1236.45	0.380019	0.182691	2.08012	0.0375143	0.429648	DHX32
ENSG00000273117	371.065	0.406049	0.195231	2.07984	0.0375405	0.429648	AC144652.1
ENSG00000270638	48.0831	0.634918	0.305303	2.07963	0.0375594	0.429648	RP3-466P17.1
ENSG00000128739	1527.73	0.631264	0.303825	2.07772	0.0377348	0.430261	SNRPN
ENSG00000067113	1419.63	0.814809	0.392186	2.07761	0.0377457	0.430261	PLPP1
ENSG00000198435	1280.7	0.357486	0.172035	2.07799	0.0377103	0.430261	NRARP
ENSG00000275902	24.6439	-0.890406	0.428421	-2.07834	0.0376779	0.430261	RP13-1032I1.11
ENSG00000215895	9.37655	-1.29584	0.623557	-2.07814	0.0376966	0.430261	RP11-334L9.1
ENSG00000240770	5.91092	-2.06419	0.99348	-2.07774	0.0377336	0.430261	C21orf91-OT1
ENSG00000006125	9119.68	0.260141	0.125279	2.07649	0.0378491	0.431211	AP2B1
ENSG00000077238	971	-0.365104	0.175853	-2.0762	0.0378758	0.431288	IL4R
ENSG00000183850	1693.35	0.771283	0.371698	2.07503	0.0379841	0.431381	ZNF730
ENSG00000163754	1193.08	0.375227	0.180784	2.07556	0.0379351	0.431381	GYG1
ENSG00000127125	1084.42	0.351989	0.16961	2.07529	0.0379595	0.431381	PPCS
ENSG00000167981	348.318	-0.819276	0.394813	-2.0751	0.0379775	0.431381	ZNF597
ENSG00000258741	16.5243	-1.04533	0.503753	-2.07509	0.0379779	0.431381	RP11-386M24.4
ENSG00000244480	6.53057	1.8512	0.89228	2.07468	0.0380159	0.431514	AC005154.7
ENSG00000169519	1002.18	0.450234	0.217051	2.07433	0.0380489	0.43163	METTL15
ENSG00000103490	547.912	0.351371	0.169405	2.07414	0.0380662	0.43163	PYCARD
ENSG00000236088	228.604	-0.38415	0.185312	-2.07298	0.0381737	0.432415	COX10-AS1
ENSG00000234589	127.436	-0.73501	0.354569	-2.07296	0.0381755	0.432415	RP11-253E3.1
ENSG00000224505	53.1635	0.691119	0.333565	2.07192	0.0382729	0.43329	AC002117.1
ENSG00000204632	33.7362	-0.975396	0.47105	-2.07069	0.0383882	0.434368	HLA-G
ENSG00000274099	14.5168	-1.40818	0.680413	-2.06959	0.0384908	0.435299	ABCB10P1
ENSG00000038002	250.428	0.458848	0.221863	2.06815	0.0386255	0.436594	AGA
ENSG00000130813	509.917	-0.402912	0.194901	-2.06727	0.0387088	0.43719	C19orf66
ENSG00000167195	29.4007	1.29353	0.62575	2.06716	0.0387188	0.43719	GOLGA6C
ENSG00000106263	16448.1	-0.239195	0.115728	-2.06686	0.0387471	0.43728	EIF3B
ENSG00000140455	1256.4	0.561876	0.271975	2.06591	0.038837	0.437835	USP3
ENSG00000231889	285.82	0.41327	0.200042	2.06592	0.0388364	0.437835	TRAF3IP2-AS1
ENSG00000085415	2467.61	-0.254792	0.123368	-2.0653	0.0388949	0.437995	SEH1L
ENSG00000060718	1333.58	-0.422177	0.204475	-2.06469	0.0389528	0.437995	COL11A1
ENSG00000134324	1049.44	0.407876	0.197529	2.06489	0.0389336	0.437995	LPIN1
ENSG00000159685	854.753	0.317734	0.153872	2.06492	0.0389307	0.437995	CHCHD6
ENSG00000138080	167.259	-0.624664	0.302466	-2.06524	0.0389006	0.437995	EMILIN1
ENSG00000185710	12.8595	-1.18605	0.574943	-2.0629	0.039122	0.439669	SMG1P4
ENSG00000130724	1897.78	0.352574	0.170934	2.06263	0.0391478	0.439729	CHMP2A
ENSG00000143321	13216.3	-0.268997	0.130539	-2.06067	0.039335	0.440302	HDGF
ENSG00000071626	9027.53	-0.351915	0.170714	-2.06143	0.0392624	0.440302	DAZAP1
ENSG00000198818	986.688	0.447659	0.217134	2.06167	0.039239	0.440302	SFT2D1
ENSG00000112812	195.25	0.46657	0.226411	2.06072	0.0393298	0.440302	PRSS16
ENSG00000218537	82.7984	-1.26963	0.615869	-2.06152	0.039253	0.440302	MIF-AS1
ENSG00000099866	56.3094	0.856313	0.415566	2.06059	0.0393419	0.440302	MADCAM1
ENSG00000104818	9.21274	1.60672	0.779653	2.06081	0.0393211	0.440302	CGB2
ENSG00000063244	6379.61	-0.316381	0.153832	-2.05667	0.0397178	0.440381	U2AF2
ENSG00000183684	5039.65	-0.323804	0.1575	-2.0559	0.0397925	0.440381	ALYREF
ENSG00000140688	1585.39	0.44871	0.218047	2.05786	0.0396038	0.440381	C16orf58
ENSG00000163611	1026.28	-0.30751	0.149551	-2.05622	0.0397611	0.440381	SPICE1
ENSG00000244509	936.187	0.443865	0.215466	2.06002	0.0393965	0.440381	APOBEC3C
ENSG00000196850	859.872	0.366175	0.177947	2.05777	0.039612	0.440381	PPTC7
ENSG00000089195	799.113	-0.433306	0.21071	-2.05641	0.0397433	0.440381	TRMT6
ENSG00000276291	430.038	-0.642449	0.312301	-2.05715	0.0396722	0.440381	FRG1HP
ENSG00000144043	412.915	-0.474786	0.230689	-2.05812	0.0395784	0.440381	TEX261
ENSG00000228594	405.024	0.669145	0.325486	2.05583	0.0397986	0.440381	FNDC10
ENSG00000079308	345.751	-0.541605	0.263133	-2.0583	0.0395617	0.440381	TNS1
ENSG00000169826	300.902	0.466698	0.226899	2.05685	0.0397008	0.440381	CSGALNACT2
ENSG00000140557	113.371	-0.494806	0.240172	-2.06021	0.0393783	0.440381	ST8SIA2
ENSG00000129451	112.362	0.690162	0.335394	2.05776	0.039613	0.440381	KLK10
ENSG00000117148	45.881	-1.26505	0.614336	-2.05922	0.039473	0.440381	ACTL8
ENSG00000258932	36.1396	1.60609	0.780873	2.05679	0.0397062	0.440381	CTD-3006G17.2
ENSG00000100373	14.6568	1.09047	0.529889	2.05791	0.0395985	0.440381	UPK3A
ENSG00000258940	14.643	1.24766	0.606467	2.05726	0.0396614	0.440381	RP11-407N17.5
ENSG00000206073	12.485	-2.15292	1.04594	-2.05836	0.0395551	0.440381	SERPINB4
ENSG00000123610	8.77256	-2.24764	1.09315	-2.05612	0.0397707	0.440381	TNFAIP6
ENSG00000237676	7.90794	-1.86748	0.907477	-2.05788	0.039602	0.440381	RPL30P4
ENSG00000240785	6.30878	-1.81787	0.883703	-2.05711	0.0396756	0.440381	RPL36AP21
ENSG00000176619	13795.8	-0.351164	0.170879	-2.05504	0.0398749	0.440483	LMNB2
ENSG00000100888	10383.1	-0.328747	0.159983	-2.05489	0.0398897	0.440483	CHD8
ENSG00000111641	1788.28	-0.314689	0.153127	-2.05509	0.0398702	0.440483	NOP2
ENSG00000235912	34.5379	-0.89143	0.433766	-2.0551	0.0398697	0.440483	RP1-159A19.3
ENSG00000231389	128.936	0.693048	0.337305	2.05467	0.0399113	0.440497	HLA-DPA1
ENSG00000267102	98.65	0.616797	0.300276	2.0541	0.0399659	0.440647	RP11-686D22.7
ENSG00000225156	5.97327	2.82779	1.37656	2.05424	0.0399527	0.440647	AC012354.6
ENSG00000152778	294.161	0.644793	0.314171	2.05236	0.0401346	0.440928	IFIT5
ENSG00000210195	77.4125	0.903463	0.440055	2.05307	0.0400661	0.440928	MT-TT
ENSG00000214975	44.27	-0.807208	0.393142	-2.05322	0.040051	0.440928	PPIAP29
ENSG00000196277	42.0816	0.763652	0.372006	2.05279	0.0400926	0.440928	GRM7
ENSG00000258702	39.3295	0.698933	0.340518	2.05256	0.0401156	0.440928	RP11-433J8.1
ENSG00000156006	29.8155	0.987547	0.480889	2.05359	0.0400156	0.440928	NAT2
ENSG00000198502	9.29251	-2.16365	1.05411	-2.05259	0.0401126	0.440928	HLA-DRB5
ENSG00000105329	97.5513	-0.498062	0.242758	-2.05168	0.040201	0.441433	TGFB1
ENSG00000135930	3953.13	-0.297776	0.145157	-2.0514	0.0402276	0.441499	EIF4E2
ENSG00000133107	133.573	-0.689266	0.336035	-2.05117	0.0402499	0.441519	TRPC4
ENSG00000198765	11.0552	-1.37084	0.668489	-2.05065	0.0403012	0.441857	SYCP1
ENSG00000163931	41978.7	0.30151	0.147089	2.04985	0.0403795	0.442041	TKT
ENSG00000182481	25195.5	0.382105	0.18637	2.05025	0.0403401	0.442041	KPNA2
ENSG00000177455	30.2855	1.12938	0.550914	2.05001	0.0403637	0.442041	CD19
ENSG00000212864	26.9624	1.01986	0.497597	2.04956	0.0404075	0.442122	RNF208
ENSG00000152137	365.771	0.452879	0.221046	2.0488	0.0404818	0.442486	HSPB8
ENSG00000187553	33.2314	1.09301	0.533483	2.04881	0.0404805	0.442486	CYP26C1
ENSG00000180787	134.77	1.08297	0.528747	2.04818	0.0405423	0.442923	ZFP3
ENSG00000087087	3943.1	-0.418711	0.204453	-2.04796	0.040564	0.442935	SRRT
ENSG00000267575	381.279	-0.370701	0.181061	-2.04738	0.0406204	0.443326	CTC-459F4.3
ENSG00000163161	1786.89	-0.273021	0.133378	-2.04697	0.0406607	0.443327	ERCC3
ENSG00000166473	286.498	0.948549	0.463393	2.04696	0.0406616	0.443327	PKD1L2
ENSG00000188785	556.482	0.391592	0.191325	2.04673	0.0406844	0.443351	ZNF548
ENSG00000254485	13.2953	1.23556	0.604034	2.04551	0.0408045	0.444435	RP11-380O24.1
ENSG00000085982	674.615	-0.376456	0.18407	-2.04518	0.0408371	0.444566	USP40
ENSG00000184925	24.8295	0.961399	0.470148	2.04489	0.040866	0.444655	LCN12
ENSG00000099795	2376.79	0.382339	0.187036	2.04421	0.040933	0.445097	NDUFB7
ENSG00000171421	872.439	-0.456068	0.223142	-2.04385	0.0409686	0.445097	MRPL36
ENSG00000175318	86.155	0.544502	0.266403	2.0439	0.0409636	0.445097	GRAMD2
ENSG00000159131	10472.1	-0.258653	0.126669	-2.04195	0.0411563	0.445938	GART
ENSG00000107651	3121.05	-0.270244	0.132463	-2.04015	0.0413358	0.445938	SEC23IP
ENSG00000122687	1196.03	-0.338816	0.165896	-2.04235	0.0411173	0.445938	MRM2
ENSG00000162073	789.311	-0.496452	0.24332	-2.04032	0.0413182	0.445938	PAQR4
ENSG00000162772	771.583	0.486801	0.238473	2.04132	0.0412185	0.445938	ATF3
ENSG00000265735	394.087	0.790416	0.387414	2.04024	0.0413269	0.445938	RN7SL5P
ENSG00000133794	327.824	-0.508576	0.248991	-2.04255	0.0410974	0.445938	ARNTL
ENSG00000144642	224.495	1.00022	0.490118	2.04078	0.0412726	0.445938	RBMS3
ENSG00000178773	182.516	0.550097	0.269424	2.04175	0.0411761	0.445938	CPNE7
ENSG00000197647	151.601	0.658046	0.322209	2.0423	0.0411222	0.445938	ZNF433
ENSG00000163421	38.3138	0.9351	0.457939	2.04198	0.0411539	0.445938	PROK2
ENSG00000153233	27.1992	0.950825	0.465938	2.04067	0.0412839	0.445938	PTPRR
ENSG00000232732	20.4458	-1.78314	0.873861	-2.04053	0.0412976	0.445938	AC073043.1
ENSG00000205220	7.91935	-1.60424	0.786135	-2.04067	0.041284	0.445938	PSMB10
ENSG00000180198	3935.5	-0.240944	0.118116	-2.0399	0.0413606	0.445983	RCC1
ENSG00000167653	7.76462	1.3307	0.652501	2.03938	0.0414124	0.446318	PSCA
[truncated: 28,488 more rows]

## Sheet: 109QvsWT
	baseMean	log2FoldChange	lfcSE	stat	pvalue	padj	gene_name
ENSG00000277918	33975.1	6.2199	0.318255	19.5437	4.66511e-85	1.08776e-80	U1
ENSG00000124762	800.537	-3.93348	0.217357	-18.0969	3.37053e-73	3.92953e-69	CDKN1A
ENSG00000174307	463.395	-2.55102	0.161509	-15.7949	3.37561e-56	2.62364e-52	PHLDA3
ENSG00000175548	366.744	3.8027	0.245741	15.4744	5.16518e-54	3.01091e-50	ALG10B
ENSG00000141510	2665.9	-3.27455	0.224632	-14.5774	3.91195e-48	1.8243e-44	TP53
ENSG00000180574	142.45	3.03722	0.254081	11.9537	6.20671e-33	2.41203e-29	EIF2S3L
ENSG00000248498	72.485	5.96588	0.533069	11.1916	4.48465e-29	1.49384e-25	ASNSP1
ENSG00000231007	62.1782	4.12485	0.376449	10.9572	6.13381e-28	1.78778e-24	CDC20P1
ENSG00000265185	607.124	-3.68537	0.340384	-10.8271	2.56129e-27	6.63574e-24	SNORD3B-1
ENSG00000168918	469.065	-2.1886	0.203042	-10.7791	4.32203e-27	1.00777e-23	INPP5D
ENSG00000228526	418.204	-2.52316	0.239236	-10.5467	5.25853e-26	1.11467e-22	MIR34A
ENSG00000255192	429.567	4.41794	0.434809	10.1606	2.97149e-24	5.77386e-21	NANOGP8
ENSG00000205592	107.555	-3.33696	0.344074	-9.69839	3.06298e-22	5.49381e-19	MUC19
ENSG00000227827	106.065	3.58901	0.379527	9.45655	3.18271e-21	5.3008e-18	RP11-958N24.2
ENSG00000087088	1805.22	-1.20446	0.130109	-9.25732	2.0962e-20	3.25848e-17	BAX
ENSG00000250337	1222.08	-3.13535	0.359844	-8.71308	2.95736e-18	4.30979e-15	LINC01021
ENSG00000229150	130.836	2.38707	0.275427	8.66681	4.44404e-18	6.09539e-15	CRYGEP
ENSG00000274276	284.713	-3.09118	0.375128	-8.24034	1.71725e-16	2.22451e-13	CBSL
ENSG00000135605	362.803	1.63974	0.200907	8.16171	3.30324e-16	4.05377e-13	TEC
ENSG00000165899	158.874	2.83935	0.353098	8.04125	8.89259e-16	1.03674e-12	OTOGL
ENSG00000173295	307.68	1.95164	0.26179	7.45499	8.98717e-14	9.97875e-11	FAM86B3P
ENSG00000248632	101.83	-4.56131	0.629594	-7.24484	4.32953e-13	4.58871e-10	RP11-366M4.11
ENSG00000223509	68.519	1.92504	0.268996	7.15639	8.28268e-13	8.39684e-10	RP11-632K20.7
ENSG00000185880	565.577	1.15151	0.161333	7.13747	9.50629e-13	9.23576e-10	TRIM69
ENSG00000163071	90.9039	-2.3289	0.330539	-7.04576	1.84448e-12	1.72031e-09	SPATA18
ENSG00000183439	42.504	-4.36017	0.63222	-6.89661	5.32594e-12	4.77634e-09	TRIM61
ENSG00000234546	58.9223	-2.83094	0.41317	-6.85176	7.29473e-12	6.29967e-09	RP3-510D11.2
ENSG00000251095	758.409	-3.09967	0.458216	-6.76464	1.33638e-11	1.11287e-08	RP11-115D19.1
ENSG00000181026	6055.63	-0.980726	0.145755	-6.72858	1.71332e-11	1.37757e-08	AEN
ENSG00000181201	163.34	-1.81082	0.273487	-6.62123	3.56225e-11	2.7687e-08	HIST3H2BA
ENSG00000064042	554.328	2.5004	0.378578	6.60471	3.9829e-11	2.99578e-08	LIMCH1
ENSG00000134574	1911.95	-1.10431	0.167737	-6.58355	4.59338e-11	3.347e-08	DDB2
ENSG00000132274	696.09	-2.02466	0.3107	-6.51644	7.19937e-11	5.0869e-08	TRIM22
ENSG00000244694	37.5654	-2.90303	0.451563	-6.42884	1.28581e-10	8.81802e-08	PTCHD4
ENSG00000185745	152.669	-1.9345	0.30137	-6.41903	1.37149e-10	9.13684e-08	IFIT1
ENSG00000250508	33.746	-5.45187	0.875212	-6.2292	4.68834e-10	3.03661e-07	RP11-757G1.6
ENSG00000148680	2724.03	1.43365	0.231861	6.18322	6.28065e-10	3.85384e-07	HTR7
ENSG00000167992	115.895	-1.39343	0.225307	-6.18457	6.22723e-10	3.85384e-07	VWCE
ENSG00000196890	1744.01	-1.40987	0.228698	-6.16477	7.05864e-10	4.22016e-07	HIST3H2BB
ENSG00000215845	476.769	-4.5421	0.738875	-6.14732	7.88023e-10	4.59358e-07	TSTD1
ENSG00000162039	178.513	2.16482	0.354219	6.11154	9.86744e-10	5.61168e-07	MEIOB
ENSG00000179698	63.611	2.05398	0.33954	6.04929	1.45486e-09	8.07689e-07	WDR97
ENSG00000167754	77.8074	-2.03966	0.339001	-6.01667	1.78041e-09	9.65435e-07	KLK5
ENSG00000177551	85.0812	-1.73844	0.289622	-6.00243	1.94391e-09	1.03014e-06	NHLH2
ENSG00000147813	950.886	-1.16574	0.196925	-5.91971	3.22509e-09	1.6711e-06	NAPRT
ENSG00000175592	75.8063	-2.26406	0.383621	-5.9018	3.59555e-09	1.82255e-06	FOSL1
ENSG00000232346	86.0468	1.97891	0.338325	5.84914	4.9411e-09	2.45131e-06	SC22CB-1E7.1
ENSG00000206077	53.5202	1.92607	0.329966	5.83717	5.30942e-09	2.57916e-06	ZDHHC11B
ENSG00000159388	435.78	-1.72566	0.298713	-5.77699	7.60489e-09	3.61884e-06	BTG2
ENSG00000120889	3932.98	-0.828329	0.144499	-5.73243	9.89995e-09	4.61674e-06	TNFRSF10B
ENSG00000125730	385.579	1.48232	0.259207	5.71866	1.0737e-08	4.90891e-06	C3
ENSG00000182109	46.1341	-2.29767	0.402938	-5.70231	1.18197e-08	5.3e-06	RP11-69E11.4
ENSG00000214922	142.378	1.28915	0.226338	5.69566	1.22894e-08	5.40663e-06	HLA-F-AS1
ENSG00000118322	203.569	2.78533	0.490368	5.68008	1.34629e-08	5.81321e-06	ATP10B
ENSG00000173535	167.254	-1.67659	0.295722	-5.66949	1.43224e-08	6.0719e-06	TNFRSF10C
ENSG00000110900	204.348	-1.68248	0.297987	-5.64615	1.64077e-08	6.83174e-06	TSPAN11
ENSG00000240342	4751.56	-0.798714	0.142735	-5.59576	2.19652e-08	8.98531e-06	RPS2P5
ENSG00000256274	79.4092	1.72859	0.310077	5.5747	2.47957e-08	9.96831e-06	TAS2R64P
ENSG00000225420	42.738	-2.61027	0.475932	-5.48453	4.14574e-08	1.63841e-05	AC104134.2
ENSG00000197462	322.008	4.39666	0.805513	5.45821	4.80946e-08	1.86904e-05	AC005276.1
ENSG00000232229	77.9743	-1.43786	0.265327	-5.41918	5.98731e-08	2.28863e-05	LINC00865
ENSG00000204172	150.65	1.69781	0.314053	5.40611	6.4407e-08	2.38875e-05	AGAP9
ENSG00000128342	193.924	-1.24841	0.230942	-5.40574	6.45414e-08	2.38875e-05	LIF
ENSG00000154529	63.3617	-2.13113	0.395148	-5.39324	6.91971e-08	2.52104e-05	CNTNAP3B
ENSG00000196684	60.6383	1.44276	0.269248	5.35849	8.39184e-08	3.01035e-05	HSH2D
ENSG00000263513	116.101	1.39979	0.263021	5.32195	1.02659e-07	3.6268e-05	FAM72C
ENSG00000162576	262.309	-1.76029	0.33304	-5.28551	1.25357e-07	4.36262e-05	MXRA8
ENSG00000130513	453.067	-2.49989	0.47466	-5.2667	1.38896e-07	4.70439e-05	GDF15
ENSG00000272983	36.0586	2.6619	0.505461	5.26628	1.39213e-07	4.70439e-05	RP11-508N22.12
ENSG00000163644	964.412	1.09149	0.209777	5.20311	1.9598e-07	6.5281e-05	PPM1K
ENSG00000186523	192.35	-1.52801	0.299143	-5.10796	3.25661e-07	0.00010695	FAM86B1
ENSG00000142552	533.029	0.843164	0.165936	5.08128	3.74905e-07	0.000121412	RCN3
ENSG00000137558	113.909	1.91057	0.378683	5.0453	4.52804e-07	0.00014351	PI15
ENSG00000259848	15.5263	3.06784	0.608193	5.04419	4.55449e-07	0.00014351	AC097374.2
ENSG00000168309	49.7043	1.55622	0.310374	5.01403	5.33024e-07	0.000165714	FAM107A
ENSG00000271369	102.141	1.79064	0.358189	4.99913	5.75896e-07	0.000174392	RP11-350D17.3
ENSG00000249378	62.8987	-4.17938	0.835971	-4.99943	5.74999e-07	0.000174392	LINC01060
ENSG00000120784	746.986	1.01751	0.206524	4.92683	8.35741e-07	0.000249833	ZFP30
ENSG00000065361	2683.21	-0.875789	0.180305	-4.85727	1.19013e-06	0.00035127	ERBB3
ENSG00000172785	853.552	-0.830611	0.171371	-4.84686	1.25429e-06	0.00036558	CBWD1
ENSG00000142089	1551.03	-1.29382	0.268389	-4.82071	1.43048e-06	0.000411783	IFITM3
ENSG00000237945	406.592	1.02827	0.213669	4.81244	1.49098e-06	0.000423965	LINC00649
ENSG00000272674	95.5594	1.63689	0.341327	4.79567	1.62132e-06	0.000455475	PCDHB16
ENSG00000065675	1153.16	0.984467	0.206148	4.77552	1.7924e-06	0.000491687	PRKCQ
ENSG00000282458	31.509	-2.12341	0.444528	-4.77678	1.78126e-06	0.000491687	WASH5P
ENSG00000187812	20.3102	2.80528	0.588935	4.76331	1.90443e-06	0.00051343	RP11-24M17.5
ENSG00000198648	1552.71	0.789157	0.165715	4.76212	1.9157e-06	0.00051343	STK39
ENSG00000125734	866.35	-0.817697	0.172131	-4.75045	2.02968e-06	0.000537795	GPR108
ENSG00000258484	10.8111	5.55822	1.17861	4.7159	2.40648e-06	0.000623465	SPESP1
ENSG00000265018	13.3696	-3.66871	0.777934	-4.71597	2.40562e-06	0.000623465	AGAP12P
ENSG00000144852	125.724	-1.32063	0.28038	-4.71015	2.47536e-06	0.000634264	NR1I2
ENSG00000277103	736.162	-1.08735	0.232015	-4.68656	2.77837e-06	0.000704166	RP11-520B13.8
ENSG00000162944	154.929	1.04495	0.225069	4.6428	3.43714e-06	0.000861762	RFTN2
ENSG00000185088	1709.96	-1.2203	0.26319	-4.63657	3.54236e-06	0.000878694	RPS27L
ENSG00000276256	681.033	0.940328	0.204419	4.60001	4.22476e-06	0.00103693	AC011043.1
ENSG00000122507	1543.79	-1.41482	0.309239	-4.57516	4.75863e-06	0.00114389	BBS9
ENSG00000189223	182.565	-7.60361	1.66175	-4.57567	4.74702e-06	0.00114389	PAX8-AS1
ENSG00000115884	2178.18	-0.906131	0.199321	-4.5461	5.46494e-06	0.00130027	SDC1
ENSG00000224114	142.442	2.55326	0.562326	4.54054	5.61115e-06	0.00132157	RP11-343H5.4
ENSG00000236924	195.984	1.19189	0.264109	4.51288	6.39527e-06	0.00149118	RP11-390F4.6
ENSG00000145632	883.295	-1.34749	0.300492	-4.48426	7.3168e-06	0.00168917	PLK2
ENSG00000279377	349.41	8.14892	1.81925	4.47928	7.48959e-06	0.00171211	AC003973.3
ENSG00000091656	403.422	0.931039	0.209254	4.44933	8.61402e-06	0.0019418	ZFHX4
ENSG00000246130	34.6481	-2.20808	0.496403	-4.44816	8.66096e-06	0.0019418	RP11-875O11.2
ENSG00000181218	1861.64	-0.957535	0.215476	-4.44381	8.83806e-06	0.00196264	HIST3H2A
ENSG00000160606	487.816	-0.813773	0.183731	-4.42916	9.46014e-06	0.00208096	TLCD1
ENSG00000132561	653.894	-0.637592	0.144878	-4.4009	1.07804e-05	0.00231019	MATN2
ENSG00000196263	107.512	-3.8742	0.880398	-4.40052	1.07994e-05	0.00231019	ZNF471
ENSG00000226007	33.1909	-2.30535	0.523608	-4.40282	1.06851e-05	0.00231019	RP11-211N8.2
ENSG00000169877	48.7671	1.80805	0.413084	4.37695	1.20354e-05	0.00255118	AHSP
ENSG00000059378	347.232	0.848641	0.195148	4.34872	1.36937e-05	0.00287654	PARP12
ENSG00000267751	123.232	1.22438	0.281695	4.34647	1.38345e-05	0.00288017	AC009005.2
ENSG00000167195	29.4007	2.64011	0.607931	4.34277	1.40696e-05	0.0029032	GOLGA6C
ENSG00000124224	535.518	0.618534	0.14306	4.32361	1.53498e-05	0.00313957	PPP4R1L
ENSG00000270022	40.0394	-2.76704	0.641438	-4.3138	1.60469e-05	0.00325361	RNU12
ENSG00000163913	1057.69	-0.713448	0.165561	-4.30928	1.63786e-05	0.00329224	IFT122
ENSG00000243970	22.9875	-2.05752	0.478238	-4.3023	1.69034e-05	0.0033687	PPIEL
ENSG00000269983	4.67531	6.19789	1.44192	4.29836	1.72066e-05	0.00340005	RP11-497H16.9
ENSG00000204287	104.315	1.4331	0.334686	4.28194	1.85273e-05	0.00363026	HLA-DRA
ENSG00000134324	1049.44	0.841593	0.196832	4.2757	1.90537e-05	0.00367169	LPIN1
ENSG00000281741	12.0405	-4.17683	0.976741	-4.27629	1.90035e-05	0.00367169	AC241377.1
ENSG00000166415	520.885	1.64927	0.386376	4.26856	1.96741e-05	0.00376016	WDR72
ENSG00000112406	827.823	0.962939	0.22637	4.25383	2.10145e-05	0.00397601	HECA
ENSG00000162931	44.254	-1.44794	0.340495	-4.25245	2.11444e-05	0.00397601	TRIM17
ENSG00000263551	96.6456	1.40772	0.331752	4.24328	2.20276e-05	0.00407633	RP11-78F17.1
ENSG00000005187	365.196	1.27434	0.300216	4.24474	2.18842e-05	0.00407633	ACSM3
ENSG00000158125	272.424	1.00496	0.237227	4.23628	2.27249e-05	0.00417226	XDH
ENSG00000161513	842.591	-1.15779	0.274212	-4.22224	2.41881e-05	0.00440621	FDXR
ENSG00000253190	683.308	-1.61141	0.38186	-4.21989	2.44417e-05	0.00441789	AC084082.3
ENSG00000250420	52.6872	2.40024	0.570239	4.20918	2.56301e-05	0.00459705	AACSP1
ENSG00000260776	377.147	1.40759	0.335181	4.19948	2.6753e-05	0.00476183	RP11-114H24.2
ENSG00000158711	1840.01	0.841618	0.200566	4.19622	2.71406e-05	0.00479423	ELK4
ENSG00000185052	208.25	-0.999368	0.239703	-4.1692	3.05676e-05	0.00528655	SLC24A3
ENSG00000074660	97.5344	-1.27954	0.306925	-4.1689	3.06079e-05	0.00528655	SCARF1
ENSG00000230313	21.6238	2.30565	0.552964	4.16961	3.05119e-05	0.00528655	HCG24
ENSG00000278023	260.435	0.992914	0.238373	4.16537	3.10842e-05	0.00532934	RDM1
ENSG00000262074	332.639	-2.04601	0.491569	-4.16221	3.15188e-05	0.0053644	SNORD3B-2
ENSG00000197134	131.362	4.64664	1.1197	4.14991	3.32603e-05	0.00561978	ZNF257
ENSG00000224174	17.6069	-3.04083	0.735781	-4.13279	3.58385e-05	0.0059689	RP4-798A10.4
ENSG00000260265	49.9427	1.45317	0.351596	4.13308	3.57934e-05	0.0059689	RP11-44F21.5
ENSG00000128594	352.065	-1.3844	0.335471	-4.12675	3.67926e-05	0.00608435	LRRC4
ENSG00000262663	31.3447	1.75289	0.427376	4.10151	4.10466e-05	0.00674003	RP11-497H17.1
ENSG00000172667	642.285	-0.773584	0.188739	-4.09869	4.15492e-05	0.00677485	ZMAT3
ENSG00000256673	43.2613	-1.3926	0.339929	-4.09675	4.18984e-05	0.00678434	RP11-599J14.2
ENSG00000215030	1140.19	-2.95289	0.725439	-4.07048	4.69164e-05	0.00754448	RPL13P12
ENSG00000272787	10.8558	-6.42448	1.57974	-4.0668	4.76626e-05	0.00761198	KB-226F1.2
ENSG00000175274	866.633	-0.678675	0.166984	-4.06431	4.81754e-05	0.00764153	TP53I11
ENSG00000154734	761.531	-0.982042	0.242201	-4.05466	5.02076e-05	0.00791007	ADAMTS1
ENSG00000100596	2806.82	-0.795015	0.196177	-4.05253	5.0667e-05	0.00792887	SPTLC2
ENSG00000273768	161.634	-1.28985	0.318917	-4.04446	5.2443e-05	0.00815209	U1
ENSG00000103550	6030.53	-0.622504	0.154048	-4.04097	5.32313e-05	0.00821983	KNOP1
ENSG00000269994	98.1575	1.63182	0.404011	4.03906	5.36669e-05	0.00823257	RP11-276H19.2
ENSG00000259692	48.461	1.4515	0.361944	4.0103	6.06422e-05	0.0092418	RP11-499F3.2
ENSG00000207357	231.458	-3.0119	0.752046	-4.00494	6.20342e-05	0.00939254	RNU6-2
ENSG00000160201	122.176	-0.940957	0.235111	-4.00219	6.27591e-05	0.00944099	U2AF1
ENSG00000196275	20.9844	-2.10202	0.525548	-3.99967	6.34299e-05	0.00948074	GTF2IRD2
ENSG00000107959	1849.32	0.653017	0.164072	3.98008	6.88934e-05	0.0102318	PITRM1
ENSG00000232938	6.9979	4.21429	1.05973	3.97675	6.98632e-05	0.0103101	RPL23AP87
ENSG00000134463	999.229	0.569387	0.143362	3.97168	7.13675e-05	0.0104659	ECHDC3
ENSG00000104331	2301.85	0.687597	0.174059	3.95038	7.80276e-05	0.0113711	IMPAD1
ENSG00000280367	57.2919	1.37241	0.347739	3.94667	7.92441e-05	0.0114766	RP11-121L10.2
ENSG00000181031	78.844	1.21733	0.309297	3.9358	8.29201e-05	0.0119349	RPH3AL
ENSG00000163431	164.04	0.869447	0.221586	3.92375	8.71804e-05	0.0123235	LMOD1
ENSG00000162777	119.348	-1.00854	0.256963	-3.92486	8.67814e-05	0.0123235	DENND2D
ENSG00000249518	38.7371	1.83799	0.468436	3.92368	8.72061e-05	0.0123235	CTC-327F10.1
ENSG00000085465	133.099	1.25448	0.320564	3.91335	9.10262e-05	0.0127495	OVGP1
ENSG00000095932	131.712	0.979634	0.250564	3.90971	9.24073e-05	0.0127495	SMIM24
ENSG00000050405	2839.98	0.662426	0.16937	3.91111	9.18713e-05	0.0127495	LIMA1
ENSG00000271755	23.7121	1.68354	0.430356	3.91197	9.15447e-05	0.0127495	RP1-153G14.4
ENSG00000119333	1824.73	-0.702852	0.180023	-3.90424	9.45227e-05	0.0129646	WDR34
ENSG00000023902	1285.91	-0.61884	0.158636	-3.901	9.57971e-05	0.0129866	PLEKHO1
ENSG00000228050	4.45268	-5.57621	1.42915	-3.90177	9.54921e-05	0.0129866	TOP3BP1
ENSG00000213025	27.0848	-2.62809	0.674297	-3.89752	9.71817e-05	0.0130982	COX20P1
ENSG00000178081	20.8794	1.76087	0.452528	3.89117	9.97605e-05	0.0133685	ULK4P3
ENSG00000029534	855.437	-0.899357	0.231611	-3.88305	0.000103156	0.0137445	ANK1
ENSG00000185070	391.463	-0.865715	0.22348	-3.87378	0.000107158	0.0141416	FLRT2
ENSG00000129654	226.874	-0.952457	0.2459	-3.87335	0.000107349	0.0141416	FOXJ1
ENSG00000236809	46.1131	-1.89077	0.488401	-3.87135	0.000108233	0.0141779	SNX25P1
ENSG00000185610	14.9104	2.92519	0.756426	3.86712	0.00011013	0.0143458	DBX2
ENSG00000265565	34.0357	-1.99199	0.515335	-3.86543	0.000110894	0.0143651	MIR3143
ENSG00000230091	55.857	-1.2614	0.327413	-3.85262	0.000116859	0.0150541	TMEM254-AS1
ENSG00000138080	167.259	-1.16924	0.30423	-3.84326	0.00012141	0.0155545	EMILIN1
ENSG00000179750	166.08	1.28693	0.335025	3.8413	0.000122385	0.0155938	APOBEC3B
ENSG00000251648	5.39204	-6.03361	1.57151	-3.83937	0.000123351	0.0156313	CTD-2353N24.1
ENSG00000242516	177.342	1.09076	0.285758	3.81709	0.000135034	0.0170194	LINC00960
ENSG00000141384	2106.35	0.475071	0.124657	3.81102	0.000138396	0.0173494	TAF4B
ENSG00000099284	1365.94	-1.3484	0.353987	-3.80917	0.000139435	0.0173862	H2AFY2
ENSG00000204961	70.9006	-2.69177	0.70885	-3.79737	0.000146238	0.0181374	PCDHA9
ENSG00000114796	3697.66	1.00716	0.266226	3.7831	0.000154887	0.0187014	KLHL24
ENSG00000165689	2343.08	-0.591478	0.156213	-3.78635	0.000152875	0.0187014	SDCCAG3
ENSG00000178977	45.146	-1.55812	0.411987	-3.78196	0.000155598	0.0187014	LINC00324
ENSG00000199102	478.228	-1.24649	0.329504	-3.78294	0.000154988	0.0187014	MIR302C
ENSG00000277269	7.58727	-5.37771	1.42178	-3.78238	0.000155336	0.0187014	MESTIT1
ENSG00000280913	42.647	1.35393	0.357967	3.78227	0.000155404	0.0187014	CTSLP2
ENSG00000200879	51.6076	-1.30323	0.344792	-3.77976	0.000156982	0.018771	SNORD14E
ENSG00000166435	511.655	0.928299	0.246216	3.77026	0.000163078	0.0192045	XRRA1
ENSG00000173530	632.52	-0.880159	0.233335	-3.77208	0.000161893	0.0192045	TNFRSF10D
ENSG00000207005	74.2489	-1.82585	0.484156	-3.7712	0.000162461	0.0192045	RNU1-2
ENSG00000181798	91.394	-1.07032	0.284314	-3.76457	0.000166837	0.0195484	LINC00471
ENSG00000177943	204.442	-0.953224	0.253312	-3.76304	0.000167863	0.0195703	MAMDC4
ENSG00000261848	19.5004	1.98591	0.531248	3.7382	0.000185339	0.0215003	CTD-2309O5.3
ENSG00000227986	55.214	2.31055	0.618562	3.73536	0.000187449	0.0216374	TRIM60P18
ENSG00000100100	162.149	1.22242	0.327704	3.73024	0.000191294	0.021965	PIK3IP1
ENSG00000248473	18.4056	-2.57155	0.689591	-3.72909	0.000192171	0.021965	CTC-338M12.2
ENSG00000164845	38.8365	1.59367	0.427877	3.7246	0.000195629	0.0222511	FAM86FP
ENSG00000073910	1095.19	0.825339	0.221937	3.71879	0.000200179	0.0226581	FRY
ENSG00000110092	6819.34	-0.833412	0.224231	-3.71676	0.000201792	0.0227303	CCND1
ENSG00000186715	164.163	1.25996	0.339931	3.70653	0.000210119	0.0235546	MST1L
ENSG00000185596	268.243	0.805215	0.217602	3.70041	0.000215251	0.0239977	WASH3P
ENSG00000186234	6.94619	4.92391	1.33101	3.69938	0.000216131	0.0239977	FAM86MP
ENSG00000173226	2517.9	0.687129	0.185971	3.69481	0.000220048	0.0243169	IQCB1
ENSG00000124587	1025.51	1.07319	0.292441	3.66977	0.000242767	0.0267009	PEX6
ENSG00000206195	4.6627	6.18701	1.69254	3.65545	0.000256726	0.0281037	DUXAP8
ENSG00000270977	33.1462	1.42456	0.389881	3.65382	0.000258365	0.0281509	AC015849.16
ENSG00000177340	7.79514	-3.58386	0.98179	-3.65033	0.000261899	0.0284032	FLJ13224
ENSG00000160321	812.56	5.96546	1.63676	3.64467	0.000267735	0.0289017	ZNF208
ENSG00000168806	569.88	-0.769911	0.211345	-3.6429	0.000269579	0.0289667	LCMT2
ENSG00000011638	1008.8	0.880423	0.241858	3.64024	0.000272383	0.0290269	TMEM159
ENSG00000125124	1087.41	0.689438	0.189405	3.64001	0.000272629	0.0290269	BBS2
ENSG00000100889	2695.87	-0.859348	0.236298	-3.63672	0.000276134	0.0292664	PCK2
ENSG00000177839	34.1492	1.70628	0.469465	3.63452	0.000278497	0.0293833	PCDHB9
ENSG00000153902	156.488	1.12426	0.309911	3.62767	0.000285993	0.0299036	LGI4
ENSG00000276248	129.06	0.937596	0.25838	3.62875	0.000284793	0.0299036	RP11-230F18.5
ENSG00000198382	1160.55	0.819642	0.22622	3.62321	0.00029097	0.0301339	UVRAG
ENSG00000144290	47.0064	1.39873	0.386044	3.62324	0.000290933	0.0301339	SLC4A10
ENSG00000143633	365.508	-0.651389	0.179831	-3.62223	0.000292073	0.0301339	C1orf131
ENSG00000197818	441.32	-0.668475	0.184976	-3.61385	0.000301682	0.0309882	SLC9A8
ENSG00000262202	144.632	-1.86432	0.516311	-3.61086	0.000305189	0.0312109	RP11-160E2.6
ENSG00000154240	179.195	0.86953	0.241331	3.60306	0.000314492	0.0320218	CEP112
ENSG00000255374	28.3604	2.26208	0.628611	3.59855	0.000320002	0.0324413	TAS2R43
ENSG00000258592	65.8863	1.4014	0.390253	3.59099	0.000329419	0.0332514	RP11-108M12.3
ENSG00000114054	3075.02	0.451694	0.125954	3.58617	0.000335567	0.033726	PCCB
ENSG00000165912	1323.17	-0.627331	0.175111	-3.58248	0.000340354	0.0340602	PACSIN3
ENSG00000115155	28.0182	-1.36941	0.382996	-3.57553	0.000349525	0.0348285	OTOF
ENSG00000100583	37.7219	-1.34525	0.376669	-3.57144	0.00035502	0.0352256	SAMD15
ENSG00000182621	657.208	1.0346	0.289947	3.56824	0.000359391	0.0355081	PLCB1
ENSG00000261068	28.8028	1.68184	0.471548	3.56663	0.000361599	0.0355756	RP11-7K24.3
ENSG00000105341	2000.67	-0.562244	0.157957	-3.55948	0.000371589	0.0364048	ATP5SL
ENSG00000258053	57.1164	1.10194	0.30975	3.5575	0.000374402	0.0365269	CTD-2021H9.3
ENSG00000168490	381.775	0.902169	0.254487	3.54504	0.000392548	0.0379794	PHYHIP
ENSG00000138074	3721.74	-0.58868	0.16603	-3.54563	0.000391672	0.0379794	SLC5A6
ENSG00000147852	2464.98	0.738258	0.208317	3.54391	0.000394245	0.037986	VLDLR
ENSG00000106536	135.549	0.976841	0.275802	3.54183	0.000397368	0.0381294	POU6F2
ENSG00000260412	58.0152	1.36271	0.385042	3.53911	0.000401472	0.0383653	RP11-438B23.2
ENSG00000120708	613.465	-1.18197	0.334263	-3.53605	0.00040616	0.0386548	TGFBI
ENSG00000275221	1844.32	-1.08089	0.305881	-3.53369	0.000409802	0.0386856	HIST1H2AK
ENSG00000168255	77.7982	-1.26266	0.35726	-3.53429	0.000408875	0.0386856	POLR2J3
ENSG00000248099	19.4694	1.845	0.522866	3.52863	0.000417714	0.0392735	INSL3
ENSG00000259030	12.6624	2.45631	0.697687	3.52065	0.000430484	0.0403117	FPGT-TNNI3K
ENSG00000206828	79.7008	-1.91105	0.54367	-3.51508	0.00043962	0.0410025	U1
ENSG00000227533	208.746	1.0466	0.298219	3.50951	0.000448929	0.0415384	SLC2A1-AS1
ENSG00000117308	565.503	-0.796462	0.226927	-3.50977	0.000448492	0.0415384	GALE
ENSG00000174891	1545.17	0.610964	0.174287	3.50551	0.000455732	0.0420012	RSRC1
ENSG00000123146	136.249	-0.689482	0.196815	-3.5032	0.000459705	0.0420351	ADGRE5
ENSG00000225205	121.526	-1.13091	0.322758	-3.5039	0.000458498	0.0420351	AC093818.1
ENSG00000232732	20.4458	-3.19752	0.914206	-3.49759	0.000469482	0.0427613	AC073043.1
ENSG00000112379	3344.54	0.791422	0.226698	3.49108	0.000481074	0.0435733	ARFGEF3
ENSG00000145675	865.156	0.665961	0.190793	3.49049	0.000482134	0.0435733	PIK3R1
ENSG00000162434	3010.89	0.482462	0.138388	3.4863	0.000489746	0.0439263	JAK1
ENSG00000135905	106.154	-0.833153	0.239052	-3.48524	0.000491691	0.0439263	DOCK10
ENSG00000270580	49.1022	1.26525	0.362986	3.48569	0.000490877	0.0439263	PKD1P6-NPIPP1
ENSG00000108551	129.535	-1.05719	0.304106	-3.47639	0.00050821	0.0452288	RASD1
ENSG00000132466	7923.89	-0.464573	0.133849	-3.47086	0.000518789	0.0458205	ANKRD17
ENSG00000266217	31.5817	1.53708	0.442793	3.47133	0.000517895	0.0458205	CTSLP2
ENSG00000261625	12.2568	-2.12018	0.611386	-3.46783	0.000524685	0.0461664	RP11-554A11.4
ENSG00000278630	17.1798	4.66532	1.34584	3.46647	0.00052735	0.0462264	RP11-78L16.1
ENSG00000164463	755.951	1.17969	0.341087	3.45861	0.000542965	0.0471343	CREBRF
ENSG00000137992	1719.81	0.667432	0.193	3.4582	0.000543799	0.0471343	DBT
ENSG00000198899	1871.34	0.547575	0.158386	3.45721	0.000545793	0.0471343	MT-ATP6
ENSG00000224877	645.133	-0.916762	0.265023	-3.45918	0.000541827	0.0471343	NDUFAF8
ENSG00000282988	51.076	-1.46247	0.423485	-3.45342	0.000553528	0.0476259	RP1-34B20.21
ENSG00000076067	902.175	0.452261	0.13106	3.4508	0.000558925	0.0479135	RBMS2
ENSG00000264343	28.8635	1.45785	0.422812	3.44799	0.00056477	0.0482372	NOTCH2NL
ENSG00000276007	70.4441	1.33082	0.386636	3.44205	0.000577323	0.048961	RP11-358L22.3
ENSG00000134201	82.1049	-1.24468	0.361821	-3.44003	0.000581644	0.048961	GSTM5
ENSG00000214401	30.0658	-1.50909	0.438623	-3.44051	0.000580625	0.048961	KANSL1-AS1
ENSG00000113209	384.373	-3.24906	0.944104	-3.44142	0.00057866	0.048961	PCDHB5
ENSG00000101445	1030.88	0.543967	0.15826	3.43717	0.000587835	0.0493041	PPP1R16B
ENSG00000204264	419.659	-0.816159	0.237587	-3.4352	0.000592117	0.0493085	PSMB8
ENSG00000106484	4839.39	-2.81963	0.820603	-3.43605	0.000590261	0.0493085	MEST
ENSG00000255621	14.799	1.82068	0.530473	3.43218	0.000598756	0.049684	RP11-377D9.3
ENSG00000100078	1316.63	0.512048	0.149281	3.43008	0.000603394	0.0497149	PLA2G3
ENSG00000164743	20.2227	-1.79014	0.521845	-3.43041	0.000602664	0.0497149	C8orf48
ENSG00000151640	642.943	-0.805722	0.235138	-3.4266	0.00061119	0.0500039	DPYSL4
ENSG00000171793	3073.84	-0.522355	0.152429	-3.42687	0.00061057	0.0500039	CTPS1
ENSG00000142627	1270.99	-0.743367	0.217059	-3.42472	0.000615431	0.0501749	EPHA2
ENSG00000183250	63.5541	-1.09235	0.319388	-3.42013	0.00062591	0.0508514	LINC01547
ENSG00000158825	76.6811	1.17707	0.345031	3.41149	0.000646092	0.0523087	CDA
ENSG00000250120	259.091	-1.60402	0.471753	-3.40013	0.000673535	0.05409	PCDHA10
ENSG00000183722	144.399	-1.3073	0.384554	-3.39952	0.000675052	0.05409	LHFP
ENSG00000157916	1926.55	-0.450979	0.132631	-3.40025	0.000673234	0.05409	RER1
ENSG00000070778	627.298	-0.651279	0.192153	-3.38938	0.000700516	0.0559381	PTPN21
ENSG00000169169	1519.28	-0.593118	0.175123	-3.38687	0.000706946	0.0562057	CPT1C
ENSG00000131437	652.206	0.488838	0.144362	3.3862	0.000708688	0.0562057	KIF3A
ENSG00000160193	524.995	-0.944555	0.279594	-3.37831	0.000729339	0.0575015	WDR4
ENSG00000237491	101.224	0.853355	0.252619	3.37803	0.000730072	0.0575015	RP11-206L10.9
ENSG00000250686	30.6586	1.70004	0.503395	3.37714	0.000732425	0.0575015	RP1-240B8.3
ENSG00000264204	13.839	-3.13485	0.929753	-3.3717	0.000747051	0.058453	AGAP7P
ENSG00000129991	207.319	0.767071	0.227921	3.36552	0.000764003	0.0594	TNNI3
ENSG00000104375	1130.58	0.843955	0.250772	3.36543	0.00076425	0.0594	STK3
ENSG00000267882	52.0191	-1.38309	0.411302	-3.36271	0.000771819	0.059789	RP4-569M23.5
ENSG00000226243	112.254	1.06512	0.31696	3.36041	0.000778276	0.0600896	RPL37AP1
ENSG00000175283	609.014	-0.635318	0.189173	-3.35839	0.00078399	0.060321	DOLK
ENSG00000224870	636.668	-0.548834	0.163464	-3.35752	0.000786446	0.060321	RP4-758J18.2
ENSG00000132773	420.735	-0.772019	0.230058	-3.35576	0.000791466	0.0605069	TOE1
ENSG00000140675	94.6832	1.50747	0.450408	3.3469	0.000817215	0.0622713	SLC5A2
ENSG00000174482	174.693	0.900301	0.26927	3.34349	0.000827314	0.0626315	LINGO2
ENSG00000221539	48.4874	-1.05651	0.315958	-3.34383	0.000826293	0.0626315	SNORD99
ENSG00000204389	617.652	-0.867823	0.259667	-3.34206	0.000831584	0.062751	HSPA1A
ENSG00000173846	220.869	-0.780025	0.233734	-3.33724	0.000846155	0.0636445	PLK3
ENSG00000119138	210.474	1.17681	0.352877	3.33492	0.000853242	0.0638941	KLF9
ENSG00000277287	42.6926	-1.33887	0.401536	-3.33436	0.000854954	0.0638941	RP4-794I6.4
ENSG00000184227	57.0423	-1.21886	0.365798	-3.33206	0.000862054	0.0639662	ACOT1
ENSG00000144115	203.499	-0.844149	0.253393	-3.33139	0.000864149	0.0639662	THNSL2
ENSG00000258702	39.3295	1.10138	0.330575	3.33171	0.000863134	0.0639662	RP11-433J8.1
ENSG00000155158	1392.33	0.615206	0.184799	3.32906	0.000871396	0.064216	TTC39B
ENSG00000138185	158.167	1.04088	0.312715	3.32854	0.000873031	0.064216	ENTPD1
ENSG00000018408	656.317	0.589496	0.1772	3.32673	0.00087873	0.0644319	WWTR1
ENSG00000182544	481.306	-0.600295	0.180889	-3.31859	0.000904738	0.0661309	MFSD5
ENSG00000198840	2863.67	0.621678	0.187432	3.31683	0.000910466	0.0663416	MT-ND3
ENSG00000233016	927.092	-0.462004	0.139437	-3.31334	0.000921882	0.066741	SNHG7
ENSG00000139874	42.9005	1.55733	0.470286	3.31145	0.000928137	0.066741	SSTR1
ENSG00000196177	836.625	0.494427	0.149415	3.30909	0.000935982	0.066741	ACADSB
ENSG00000006453	1761.65	0.546777	0.165222	3.30934	0.000935163	0.066741	BAIAP2L1
ENSG00000255052	19.2156	-2.5043	0.756736	-3.30934	0.000935159	0.066741	FAM66D
ENSG00000260630	161.434	0.719721	0.217459	3.30969	0.000934001	0.066741	SNAI3-AS1
ENSG00000260230	88.5239	0.986042	0.297911	3.30986	0.000933437	0.066741	FRRS1L
ENSG00000129990	26.4245	1.42407	0.430942	3.30456	0.000951264	0.0676239	SYT5
ENSG00000162409	1319.88	0.932225	0.28262	3.29852	0.000971971	0.0686771	PRKAA2
ENSG00000168702	23.7605	-1.71981	0.521264	-3.2993	0.000969253	0.0686771	LRP1B
ENSG00000169032	3192.8	0.369786	0.11221	3.2955	0.000982479	0.0688264	MAP2K1
ENSG00000144331	73.6396	0.815169	0.247342	3.29572	0.000981691	0.0688264	ZNF385B
ENSG00000214946	24.4777	1.37859	0.418341	3.29536	0.000982939	0.0688264	TBC1D26
ENSG00000078319	329.055	0.536767	0.163052	3.29199	0.000994795	0.069448	PMS2P1
ENSG00000159917	216.871	-0.646704	0.196579	-3.2898	0.0010026	0.069576	ZNF235
ENSG00000198799	3190.35	0.690327	0.209835	3.28986	0.00100239	0.069576	LRIG2
ENSG00000206341	60.8889	-1.50944	0.45956	-3.28453	0.00102151	0.0701222	HLA-H
ENSG00000249042	161.633	1.06408	0.323876	3.28546	0.00101817	0.0701222	CTD-2015H6.3
ENSG00000228828	38.4025	2.34118	0.712847	3.28426	0.0010225	0.0701222	TLK2P2
ENSG00000227403	62.2526	1.32072	0.402058	3.2849	0.00102019	0.0701222	AC009299.3
ENSG00000277149	303.788	-1.34528	0.410243	-3.27922	0.00104094	0.0710377	TYW1B
ENSG00000138641	268.65	0.875146	0.266898	3.27895	0.00104194	0.0710377	HERC3
ENSG00000130270	227.483	1.28516	0.392422	3.27495	0.00105682	0.0718424	ATP8B3
ENSG00000241484	187.835	0.862089	0.263537	3.27123	0.00107081	0.0725817	ARHGAP8
ENSG00000203812	57.147	-1.45999	0.446682	-3.26851	0.00108114	0.0726016	HIST2H2AA3
ENSG00000226210	413.937	0.893086	0.273169	3.26935	0.00107795	0.0726016	WASH7P
ENSG00000233006	63.3826	1.40488	0.429905	3.26788	0.00108356	0.0726016	AC034220.3
ENSG00000260409	8.37668	3.09661	0.947475	3.26828	0.00108204	0.0726016	RP11-403B2.7
ENSG00000211751	4.09907	-5.07357	1.55323	-3.26646	0.00108901	0.0727578	TRBC1
ENSG00000279602	386.216	-1.16307	0.356156	-3.26561	0.00109228	0.072768	CTD-3014M21.1
ENSG00000225192	9.84291	3.07423	0.941678	3.26463	0.00109607	0.0728124	ZNF33BP1
ENSG00000101311	676.118	-1.0985	0.336635	-3.26318	0.00110168	0.0729767	FERMT1
ENSG00000274997	12018.9	-1.1425	0.350581	-3.25888	0.00111853	0.0736742	HIST1H2AH
ENSG00000234171	545.281	-0.601441	0.18451	-3.25967	0.00111542	0.0736742	RNASEH1-AS1
ENSG00000117480	359.176	-1.15849	0.355937	-3.25477	0.00113485	0.0742771	FAAH
ENSG00000172840	1986.45	0.651118	0.200118	3.25367	0.00113926	0.0742771	PDP2
ENSG00000137193	3068.15	0.660612	0.203036	3.25366	0.00113927	0.0742771	PIM1
ENSG00000276216	48.4078	-1.75734	0.540158	-3.25338	0.00114042	0.0742771	CH17-373J23.1
ENSG00000204252	1914.09	0.640201	0.196887	3.25162	0.00114749	0.074529	HLA-DOA
ENSG00000138802	1948.32	0.510344	0.157319	3.24401	0.0011786	0.0763371	SEC24B
ENSG00000181240	9.21383	2.38449	0.735247	3.24311	0.00118231	0.0763654	SLC25A41
ENSG00000243244	877.937	0.848566	0.261767	3.24168	0.00118826	0.0765377	STON1
ENSG00000196116	137.55	0.726358	0.224319	3.23805	0.00120349	0.0773052	TDRD7
ENSG00000148832	156.277	-0.818193	0.252977	-3.23426	0.00121957	0.0779707	PAOX
ENSG00000170836	723.751	-0.477135	0.147549	-3.23374	0.00122181	0.0779707	PPM1D
ENSG00000188177	1478.06	0.599199	0.185324	3.23325	0.00122388	0.0779707	ZC3H6
ENSG00000267711	12.2515	2.11537	0.654452	3.23228	0.00122805	0.0780232	RP11-686D22.5
ENSG00000080546	1098.62	-0.680243	0.210639	-3.22943	0.00124038	0.0783794	SESN1
ENSG00000154760	2114.97	0.794441	0.245945	3.23016	0.00123722	0.0783794	SLFN13
ENSG00000168016	1448.99	-0.721657	0.223762	-3.22511	0.00125926	0.0789303	TRANK1
ENSG00000075239	1357.85	0.587739	0.182232	3.22523	0.00125873	0.0789303	ACAT1
ENSG00000010610	145.753	1.10212	0.341571	3.22662	0.0012526	0.0789303	CD4
ENSG00000159618	200.821	-3.35713	1.04129	-3.224	0.00126412	0.079023	ADGRG5
ENSG00000196152	356.219	-0.693042	0.215042	-3.22281	0.00126938	0.0791395	ZNF79
ENSG00000224557	983.864	0.49545	0.153912	3.21905	0.00128618	0.0799729	HLA-DPB2
ENSG00000267313	335.993	0.69467	0.216013	3.21587	0.0013005	0.0806485	KC6
ENSG00000152208	3396.47	1.04495	0.325134	3.21389	0.00130948	0.08081	GRID2
ENSG00000183317	42.6734	1.27614	0.397086	3.21377	0.00131004	0.08081	EPHA10
ENSG00000233593	47.0668	1.51821	0.473125	3.20891	0.0013324	0.0819723	RP4-665J23.1
ENSG00000109846	35.3561	-1.20775	0.376686	-3.20625	0.00134478	0.0822998	CRYAB
ENSG00000130511	731.003	-0.520215	0.162227	-3.20672	0.00134259	0.0822998	SSBP4
ENSG00000182768	1670.45	-0.562397	0.175598	-3.20276	0.00136117	0.083085	NGRN
ENSG00000181234	32.7749	1.94101	0.606239	3.20173	0.00136606	0.0831654	TMEM132C
ENSG00000210082	1314.18	-1.52708	0.477685	-3.19683	0.00138944	0.0841785	MT-RNR2
ENSG00000105327	709.801	-0.952117	0.29784	-3.19674	0.00138992	0.0841785	BBC3
ENSG00000143632	148.63	-2.58219	0.809122	-3.19135	0.00141607	0.0855404	ACTA1
ENSG00000100647	164.461	-0.778731	0.244527	-3.18464	0.00144935	0.0870989	SUSD6
ENSG00000140403	321.812	-0.692876	0.217554	-3.18485	0.00144831	0.0870989	DNAJA4
ENSG00000172073	12.21	-3.26051	1.02492	-3.18122	0.00146656	0.0879071	TEX37
ENSG00000198046	686.525	-3.21944	1.01385	-3.17545	0.00149604	0.0885111	ZNF667
ENSG00000199879	149.508	-1.37888	0.434135	-3.17616	0.0014924	0.0885111	RNU1-120P
ENSG00000129255	1618.52	-0.595989	0.187748	-3.17441	0.00150143	0.0885111	MPDU1
ENSG00000182325	487.307	-0.526712	0.165784	-3.17709	0.00148762	0.0885111	FBXL6
ENSG00000158467	1802.88	0.541755	0.170453	3.17832	0.00148133	0.0885111	AHCYL2
ENSG00000054356	113.472	0.900532	0.283716	3.17406	0.00150321	0.0885111	PTPRN
ENSG00000188372	146.237	0.943972	0.297186	3.17637	0.00149132	0.0885111	ZP3
ENSG00000167272	796.464	-0.608274	0.192015	-3.16784	0.00153574	0.0901987	POP5
ENSG00000270276	52.8021	-1.289	0.407274	-3.16496	0.00155107	0.0903179	HIST2H4B
ENSG00000108592	3475.84	-0.533178	0.168482	-3.16459	0.001553	0.0903179	FTSJ3
ENSG00000120256	1389.18	0.476465	0.150598	3.16382	0.00155714	0.0903179	LRP11
ENSG00000229358	169.566	0.862593	0.272505	3.16542	0.00154861	0.0903179	DPY19L1P1
ENSG00000124159	52.7735	1.07325	0.339194	3.16413	0.00155548	0.0903179	MATN4
ENSG00000134539	18.5394	1.98243	0.626832	3.16262	0.00156356	0.0904653	KLRD1
ENSG00000260763	9.39852	2.44431	0.773655	3.15943	0.00158077	0.0912346	RP11-445O3.3
ENSG00000075673	116.712	0.844377	0.267567	3.15576	0.00160082	0.0921639	ATP12A
ENSG00000170775	360.46	0.74915	0.237464	3.15479	0.00160613	0.0921995	GPR37
ENSG00000267079	9.79736	2.27455	0.721115	3.15421	0.00160935	0.0921995	RP11-820I16.1
ENSG00000175311	7.25085	4.09169	1.30273	3.14087	0.00168449	0.0960887	ANKS4B
ENSG00000267858	40.1781	-1.37951	0.439238	-3.14069	0.00168548	0.0960887	MZF1-AS1
ENSG00000142698	187.874	-1.1341	0.361392	-3.13814	0.00170025	0.0965489	C1orf94
ENSG00000105329	97.5513	-0.762284	0.242931	-3.13787	0.00170183	0.0965489	TGFB1
ENSG00000140478	46.1786	1.51342	0.483132	3.13252	0.00173313	0.098086	GOLGA6D
ENSG00000276903	4095.39	-0.894241	0.286038	-3.1263	0.00177023	0.0988801	HIST1H2AL
ENSG00000258704	105.408	0.790073	0.253034	3.1224	0.00179381	0.0988801	SRP54-AS1
ENSG00000131069	1220.77	0.838569	0.268038	3.12855	0.00175673	0.0988801	ACSS2
ENSG00000198156	9.4549	2.21988	0.710253	3.12547	0.00177518	0.0988801	NPIPB6
ENSG00000230923	9.52397	-2.1652	0.693142	-3.12375	0.00178562	0.0988801	LINC00309
ENSG00000238090	17.2492	-2.01919	0.645731	-3.12699	0.00176605	0.0988801	AC006195.2
ENSG00000251079	12.8418	1.88013	0.602009	3.1231	0.00178959	0.0988801	BMS1P2
ENSG00000140043	389.538	0.880944	0.281926	3.12474	0.00177962	0.0988801	PTGR2
ENSG00000260278	26.6752	-1.30178	0.41621	-3.12769	0.00176187	0.0988801	RP11-109G23.3
ENSG00000272030	15.282	-1.60022	0.512203	-3.12418	0.00178301	0.0988801	RP1-178F15.4
ENSG00000162374	80.821	1.04399	0.333835	3.12727	0.00176436	0.0988801	ELAVL4
ENSG00000080573	72.3101	0.982535	0.31479	3.12124	0.00180092	0.0990381	COL5A3
ENSG00000197903	12451.8	-1.02362	0.32823	-3.11859	0.00181716	0.099229	HIST1H2BK
ENSG00000092871	736.847	0.553237	0.177397	3.11863	0.00181692	0.099229	RFFL
ENSG00000243811	586.883	0.713943	0.228882	3.11926	0.00181307	0.099229	APOBEC3D
ENSG00000167461	2435.56	-0.384154	0.123359	-3.11411	0.001845	0.100514	RAB8A
ENSG00000234745	974.663	-0.577279	0.185433	-3.11315	0.00185104	0.100563	HLA-B
ENSG00000120324	59.8831	1.60602	0.515976	3.11259	0.00185454	0.100563	PCDHB10
ENSG00000137573	1525.37	0.997286	0.320486	3.11179	0.00185958	0.100603	SULF1
ENSG00000088538	610.431	0.724767	0.233126	3.10891	0.00187781	0.101354	DOCK3
ENSG00000247626	1615.86	0.4539	0.146099	3.10679	0.0018913	0.101847	MARS2
ENSG00000108306	801.835	0.712149	0.229327	3.10538	0.00190035	0.102098	FBXL20
ENSG00000206737	52.6482	-1.46472	0.47209	-3.10263	0.00191812	0.102808	RNVU1-18
ENSG00000136960	203.96	-1.25262	0.403813	-3.10197	0.00192238	0.102808	ENPP2
ENSG00000140398	244.058	0.732348	0.236161	3.10105	0.00192833	0.10289	NEIL1
ENSG00000186976	43.0198	-1.24022	0.400197	-3.09902	0.00194161	0.102892	EFCAB6
ENSG00000276700	8.03467	-5.16904	1.66767	-3.09956	0.00193806	0.102892	RNA5-8S5
ENSG00000278055	13.0781	-3.81312	1.23016	-3.0997	0.0019372	0.102892	MESTIT1
ENSG00000233421	146.467	-1.01665	0.328365	-3.0961	0.00196082	0.103674	RP5-875O13.1
ENSG00000264175	10.1127	-4.19634	1.35597	-3.09471	0.00197008	0.103928	MIR3189
ENSG00000168310	744.582	0.584846	0.189107	3.09268	0.00198358	0.104404	IRF2
ENSG00000173041	1733.47	1.06869	0.345665	3.09169	0.0019902	0.104517	ZNF680
ENSG00000170619	469.191	-0.528663	0.171051	-3.09067	0.00199705	0.104641	COMMD5
ENSG00000115020	4501.75	0.50396	0.163168	3.08859	0.00201109	0.10514	PIKFYVE
ENSG00000111962	2700.5	0.558936	0.181036	3.08742	0.00201901	0.105318	UST
ENSG00000144476	50.9906	-1.02535	0.332761	-3.08133	0.00206075	0.106598	ACKR3
ENSG00000118473	38.6625	1.03928	0.337299	3.08118	0.00206183	0.106598	SGIP1
ENSG00000188229	9312.24	-0.425348	0.138003	-3.08217	0.00205496	0.106598	TUBB4B
ENSG00000077157	1201.07	0.61374	0.199069	3.08305	0.00204888	0.106598	PPP1R12B
ENSG00000131507	1376.58	0.441058	0.143299	3.07788	0.00208479	0.107546	NDFIP1
ENSG00000167617	114.878	0.922742	0.299884	3.07699	0.00209099	0.107628	CDC42EP5
ENSG00000139835	1628.6	0.600697	0.195342	3.0751	0.00210429	0.108074	GRTP1
ENSG00000152939	843.415	-2.55884	0.832571	-3.07342	0.00211624	0.108449	MARVELD2
ENSG00000115129	897.489	-0.628138	0.20495	-3.06484	0.00217787	0.109443	TP53I3
ENSG00000136717	1972.63	0.410892	0.133868	3.06938	0.00214504	0.109443	BIN1
ENSG00000124253	4.53868	4.64962	1.51517	3.06871	0.00214982	0.109443	PCK1
ENSG00000105464	403.246	0.698516	0.227539	3.06988	0.00214145	0.109443	GRIN2D
ENSG00000139597	218.459	0.834982	0.272383	3.06547	0.00217328	0.109443	N4BP2L1
ENSG00000164398	53.6676	0.86807	0.283056	3.06678	0.00216379	0.109443	ACSL6
ENSG00000224540	7.62792	-3.29256	1.07396	-3.06582	0.00217071	0.109443	RP11-385M4.3
ENSG00000258376	46.6739	2.31408	0.754817	3.06575	0.00217125	0.109443	RP4-647C14.2
ENSG00000260645	83.7918	0.923196	0.300917	3.06794	0.00215542	0.109443	RP11-250B2.5
ENSG00000268324	11.0142	-2.35351	0.768082	-3.06413	0.00218301	0.109465	LRRC2-AS1
ENSG00000164002	286.943	-0.577901	0.188757	-3.06161	0.00220151	0.109897	EXO5
ENSG00000174775	583.835	-0.502261	0.164015	-3.06229	0.00219652	0.109897	HRAS
ENSG00000256417	39.8805	1.15175	0.376262	3.06103	0.00220576	0.109897	RP11-1038A11.3
ENSG00000248817	51.328	1.19161	0.389519	3.05919	0.00221933	0.110337	PMPCAP1
ENSG00000167705	270.806	-0.578345	0.189391	-3.05372	0.00226025	0.111162	RILP
ENSG00000121775	375.229	-0.569537	0.186454	-3.05457	0.00225386	0.111162	TMEM39B
ENSG00000227199	187.887	0.54228	0.177613	3.05315	0.00226453	0.111162	ST7-AS1
ENSG00000026950	435.596	0.633401	0.207363	3.05455	0.002254	0.111162	BTN3A1
ENSG00000251533	29.7984	1.24699	0.408367	3.0536	0.00226114	0.111162	LINC00605
ENSG00000256299	27.3418	1.2874	0.421233	3.05625	0.00224123	0.111162	RP11-989F5.3
ENSG00000154736	62.4626	-1.26441	0.414274	-3.0521	0.00227246	0.111168	ADAMTS5
ENSG00000011009	3482.8	-0.468149	0.153397	-3.05187	0.00227418	0.111168	LYPLA2
ENSG00000185272	197.07	0.750978	0.246242	3.04975	0.0022903	0.111722	RBM11
ENSG00000155858	830.955	0.637977	0.209499	3.04524	0.00232492	0.113173	LSM11
ENSG00000275464	428.526	-0.54519	0.17925	-3.0415	0.00235404	0.114114	CH507-9B2.5
ENSG00000106772	1382.84	0.64278	0.211335	3.04153	0.0023538	0.114114	PRUNE2
ENSG00000051596	1261.1	-0.755127	0.249109	-3.03132	0.00243491	0.11779	THOC3
ENSG00000277453	30.4218	-1.57619	0.520095	-3.03058	0.00244082	0.117832	CTC-492K19.7
ENSG00000188732	931.51	0.781193	0.258036	3.02746	0.00246617	0.118809	FAM221A
ENSG00000198515	46.4361	0.997403	0.329587	3.02622	0.00247634	0.119053	CNGA1
ENSG00000197153	7454.18	-0.794177	0.262926	-3.02054	0.00252328	0.120861	HIST1H3J
ENSG00000175414	340.665	0.698285	0.231236	3.01979	0.00252949	0.120861	ARL10
ENSG00000253333	5.42774	2.92868	0.969789	3.01991	0.00252849	0.120861	RP11-497H16.8
ENSG00000173705	131.371	-1.12921	0.374571	-3.01467	0.00257257	0.122668	SUSD5
ENSG00000182584	35.4845	-1.21771	0.404096	-3.01341	0.00258329	0.122928	ACTL10
ENSG00000142303	454.375	-0.714437	0.237245	-3.01138	0.00260062	0.122999	ADAMTS10
ENSG00000168159	2341.05	-0.708049	0.235085	-3.01189	0.00259628	0.122999	RNF187
ENSG00000179598	53.0608	1.30652	0.433698	3.01251	0.00259094	0.122999	PLD6
ENSG00000196793	569.264	-0.797102	0.264824	-3.00994	0.00261303	0.123336	ZNF239
ENSG00000183598	6084.11	-0.851576	0.283489	-3.00391	0.0026653	0.124543	HIST2H3D
ENSG00000124766	18379.7	0.496998	0.165338	3.00595	0.00264753	0.124543	SOX4
ENSG00000108375	250.499	1.12995	0.376065	3.00466	0.00265874	0.124543	RNF43
ENSG00000197813	22.9469	1.44305	0.48034	3.00423	0.00266255	0.124543	CTC-301O7.4
ENSG00000267197	26.3947	-1.23615	0.411395	-3.00477	0.00265784	0.124543	CTC-429L19.3
ENSG00000197181	170.226	1.00001	0.333348	2.99991	0.00270058	0.125939	PIWIL2
ENSG00000143499	203.207	-1.03047	0.343869	-2.99668	0.00272933	0.126665	SMYD2
ENSG00000111321	183.494	-0.534753	0.178451	-2.99664	0.00272974	0.126665	LTBR
ENSG00000156535	471.451	0.682088	0.227687	2.99573	0.00273787	0.126665	CD109
ENSG00000178852	120.088	1.09151	0.364314	2.99606	0.00273494	0.126665	EFCAB13
ENSG00000088986	3893.35	-0.542599	0.181207	-2.99437	0.00275013	0.12698	DYNLL1
ENSG00000224669	28.3444	1.79514	0.60007	2.99155	0.00277562	0.127903	RP11-561N12.1
ENSG00000203288	44.3851	1.17597	0.394063	2.98422	0.002843	0.130074	RP11-98D18.9
ENSG00000223131	61.0277	-1.30248	0.436487	-2.984	0.00284503	0.130074	RNA5SP304
ENSG00000240086	48.602	1.66835	0.558884	2.98515	0.00283438	0.130074	RP11-657O9.1
ENSG00000260455	53.6728	0.967366	0.324133	2.98448	0.00284065	0.130074	NBAT1
ENSG00000012223	12.1415	-1.9428	0.651347	-2.98274	0.00285677	0.130355	LTF
ENSG00000152409	2019.87	0.587893	0.197162	2.98177	0.00286585	0.13045	JMY
ENSG00000275611	28.1272	1.18269	0.3967	2.98132	0.00287005	0.13045	RP11-291I6.2
ENSG00000136997	2988.97	0.62754	0.210786	2.97715	0.00290946	0.131984	MYC
ENSG00000015475	1089.88	-0.594257	0.199686	-2.97595	0.0029208	0.132206	BID
ENSG00000160190	1199.72	-0.459648	0.154481	-2.97544	0.0029257	0.132206	SLC37A1
ENSG00000163162	1191.24	0.516353	0.173668	2.97322	0.00294692	0.132393	RNF149
ENSG00000180488	481.929	0.687297	0.231287	2.97162	0.00296232	0.132393	MIGA1
ENSG00000187824	103.35	0.772049	0.259821	2.97146	0.00296389	0.132393	TMEM220
ENSG00000225345	32.4542	-1.53568	0.516782	-2.97162	0.00296233	0.132393	SNX18P3
ENSG00000231240	8.91388	-4.46835	1.50292	-2.9731	0.00294805	0.132393	KLF2P1
ENSG00000231312	186.001	0.905338	0.304491	2.97328	0.00294636	0.132393	AC007246.3
ENSG00000235159	4.3502	-4.70787	1.58537	-2.96957	0.00298213	0.132953	RP6-109B7.4
ENSG00000278588	11369.6	-0.705761	0.237867	-2.96704	0.00300682	0.133798	HIST1H2BI
ENSG00000121691	1122.02	0.808927	0.272823	2.96503	0.00302656	0.13442	CAT
ENSG00000270882	96.6498	-1.19446	0.403025	-2.96373	0.00303933	0.13473	HIST2H4A
ENSG00000272196	74.5235	-1.28547	0.434092	-2.96129	0.00306351	0.134777	HIST2H2AA4
ENSG00000134202	120.767	-0.741865	0.250496	-2.96158	0.00306067	0.134777	GSTM3
ENSG00000196787	15901.4	-0.734125	0.247881	-2.9616	0.00306047	0.134777	HIST1H2AG
ENSG00000168802	2377.42	-0.620427	0.209425	-2.96253	0.00305127	0.134777	CHTF8
ENSG00000116032	27.7659	1.407	0.47549	2.95906	0.00308578	0.135501	GRIN3B
ENSG00000065621	620.102	-0.542415	0.183375	-2.95796	0.00309683	0.135731	GSTO2
ENSG00000197182	18.6425	-2.45495	0.830496	-2.956	0.00311653	0.136338	MIRLET7BHG
ENSG00000115267	113.08	0.907812	0.307427	2.95294	0.00314768	0.137179	IFIH1
ENSG00000221986	3.84836	-4.5764	1.54967	-2.95315	0.0031455	0.137179	MYBPHL
ENSG00000261622	13.246	1.99712	0.676446	2.95238	0.00315339	0.137179	RP11-484P15.1
ENSG00000254701	7.56787	2.54788	0.863247	2.95151	0.00316223	0.137307	RP11-1415C14.4
ENSG00000164619	36.6768	-1.31146	0.444734	-2.94887	0.00318939	0.138228	BMPER
ENSG00000166770	394.535	-3.2074	1.08895	-2.94539	0.00322544	0.139112	ZNF667-AS1
ENSG00000101670	663.261	1.12899	0.383334	2.94518	0.00322766	0.139112	LIPG
ENSG00000232284	9.51082	1.93001	0.655085	2.9462	0.00321701	0.139112	GNG12-AS1
ENSG00000169495	9.56289	-3.95045	1.34261	-2.94237	0.00325711	0.140122	HTRA4
ENSG00000269793	35.3708	-6.96794	2.36888	-2.94145	0.00326678	0.140279	ZIM2-AS1
ENSG00000156671	1459.15	0.544724	0.185301	2.93967	0.00328562	0.140829	SAMD8
ENSG00000162769	3521.66	0.52535	0.178772	2.93866	0.00329631	0.141028	FLVCR1
ENSG00000146005	27.3565	1.42455	0.484859	2.93807	0.00330258	0.141037	PSD2
ENSG00000008226	46.9746	-0.955212	0.325409	-2.93542	0.00333096	0.141989	DLEC1
ENSG00000057657	21.9158	-1.43738	0.490476	-2.93059	0.00338316	0.143876	PRDM1
ENSG00000253210	33.6529	-1.15194	0.39313	-2.93019	0.00338756	0.143876	RP11-809O17.1
ENSG00000133454	97.8827	0.995376	0.339928	2.92819	0.00340937	0.144394	MYO18B
ENSG00000186235	71.2775	1.12103	0.382872	2.92794	0.00341216	0.144394	AC016757.3
ENSG00000214553	13.8821	-2.33445	0.797553	-2.92702	0.00342225	0.144559	LRRC37A11P
ENSG00000103226	285.569	0.702614	0.240342	2.9234	0.00346236	0.145989	NOMO3
ENSG00000175395	150.822	0.988591	0.338292	2.9223	0.00347454	0.146238	ZNF25
ENSG00000231389	128.936	0.977929	0.334812	2.92083	0.00349102	0.146667	HLA-DPA1
ENSG00000259485	90.5055	1.20253	0.412207	2.91729	0.00353087	0.148074	CTD-2147F2.1
ENSG00000272341	20.1153	1.71219	0.587055	2.91657	0.00353899	0.148149	RP1-151F17.2
ENSG00000100027	833.545	0.795954	0.272989	2.9157	0.00354896	0.148299	YPEL1
ENSG00000116199	3792.91	0.390074	0.133918	2.91278	0.00358226	0.149423	FAM20B
ENSG00000228038	71.061	-1.10393	0.379243	-2.91088	0.00360413	0.149609	VN1R51P
ENSG00000163481	574.711	-0.504718	0.173433	-2.91017	0.00361237	0.149609	RNF25
ENSG00000135248	126.475	1.18918	0.408577	2.91054	0.00360804	0.149609	FAM71F1
ENSG00000239827	18.7952	1.32238	0.454306	2.91078	0.00360526	0.149609	SUGT1P3
ENSG00000196735	3.96599	4.28799	1.47396	2.90917	0.00362394	0.149822	HLA-DQA1
ENSG00000006016	327.774	-1.27136	0.437669	-2.90485	0.00367433	0.150835	CRLF1
ENSG00000111450	1259.49	0.46993	0.161772	2.90489	0.00367381	0.150835	STX2
ENSG00000223719	10.4512	-6.88005	2.36814	-2.90526	0.00366949	0.150835	AC024162.2
ENSG00000256546	287.489	0.555769	0.191232	2.90626	0.00365779	0.150835	AC156455.1
ENSG00000152778	294.161	-0.923679	0.318067	-2.90404	0.00368376	0.150957	IFIT5
ENSG00000124635	11197.6	-0.719562	0.247968	-2.90183	0.00370984	0.151759	HIST1H2BJ
ENSG00000089177	946.056	0.385332	0.132865	2.90016	0.00372967	0.152036	KIF16B
ENSG00000187624	35.0009	-1.4775	0.509435	-2.90027	0.00372847	0.152036	C17orf97
ENSG00000272180	30.8256	1.38622	0.478085	2.89953	0.00373728	0.152081	RP11-481J13.1
ENSG00000280511	315.241	1.00952	0.348369	2.89786	0.00375722	0.152625	RP11-35J1.2
ENSG00000180340	855.846	-1.12112	0.387174	-2.89565	0.00378369	0.153167	FZD2
ENSG00000101638	58.0626	-1.00695	0.347739	-2.89571	0.00378301	0.153167	ST8SIA5
ENSG00000215866	59.6308	0.889203	0.307251	2.89406	0.00380301	0.153683	LINC01356
ENSG00000277475	14.393	-2.52594	0.873141	-2.89293	0.00381664	0.153967	AC213203.1
ENSG00000179218	19265.9	-0.470632	0.162795	-2.89094	0.00384093	0.154412	CALR
ENSG00000181264	633.716	0.530005	0.183322	2.89111	0.00383885	0.154412	TMEM136
ENSG00000246560	47.6095	-0.814081	0.282009	-2.88672	0.00389281	0.15596	RP11-10L12.4
ENSG00000261335	74.3875	-0.84986	0.294383	-2.88692	0.00389032	0.15596	RP11-318A15.2
ENSG00000163421	38.3138	1.30156	0.451037	2.88571	0.00390531	0.156174	PROK2
ENSG00000222019	85.7071	0.761319	0.26387	2.88521	0.00391156	0.156174	URAHP
ENSG00000142621	91.9177	-0.997883	0.346093	-2.88328	0.00393557	0.156597	FHAD1
ENSG00000269837	429.572	-0.678461	0.235296	-2.88344	0.00393361	0.156597	IPO5P1
ENSG00000256663	52.5344	-1.03623	0.359499	-2.88243	0.00394619	0.156668	RP11-424C20.2
ENSG00000124507	428.795	0.479343	0.166319	2.88206	0.0039508	0.156668	PACSIN1
ENSG00000206503	7231.34	0.491345	0.170596	2.88016	0.00397468	0.157081	HLA-A
ENSG00000273015	839.591	0.63066	0.218953	2.88034	0.00397244	0.157081	RP11-352M15.2
ENSG00000106341	88.3689	-1.72832	0.600192	-2.87961	0.00398172	0.157093	PPP1R17
ENSG00000275405	125.794	-1.34614	0.467942	-2.87671	0.0040184	0.158272	U1
ENSG00000178636	15.0806	1.73684	0.604287	2.87419	0.00405063	0.159272	RP11-455G16.1
ENSG00000185201	608.197	-0.736082	0.256377	-2.87109	0.00409053	0.160571	IFITM2
ENSG00000174628	174.964	-0.530518	0.184855	-2.86992	0.00410574	0.160897	IQCK
ENSG00000116991	1416.33	-0.859165	0.299512	-2.86855	0.00412364	0.16121	SIPA1L2
ENSG00000154359	3995.62	0.533656	0.186072	2.86801	0.00413068	0.16121	LONRF1
ENSG00000254634	100.364	0.746187	0.260203	2.86771	0.00413448	0.16121	SMG1P6
ENSG00000180628	231.251	0.891984	0.311172	2.86653	0.00414996	0.161543	PCGF5
ENSG00000111058	1856.86	0.56976	0.19895	2.86383	0.00418552	0.162656	ACSS3
ENSG00000204588	25.9912	1.35762	0.475077	2.85768	0.00426754	0.165568	LINC01123
ENSG00000076604	4401.12	-0.433031	0.151586	-2.85666	0.00428118	0.165821	TRAF4
ENSG00000081277	20.4122	-1.66518	0.584129	-2.8507	0.00436228	0.167847	PKP1
ENSG00000182362	428.789	-0.471206	0.165257	-2.85135	0.00435335	0.167847	YBEY
ENSG00000169302	157.22	0.709353	0.248812	2.85096	0.0043587	0.167847	STK32A
ENSG00000213777	38.0852	0.998234	0.350111	2.8512	0.00435552	0.167847	CTD-2224J9.8
ENSG00000164576	819.988	-0.443512	0.155774	-2.84715	0.00441124	0.168895	SAP30L
ENSG00000163960	5329.19	0.477749	0.167793	2.84725	0.00440993	0.168895	UBXN7
ENSG00000170624	19.2483	-1.31373	0.461412	-2.84719	0.00441069	0.168895	SGCD
ENSG00000235590	665.32	-0.481447	0.169157	-2.84615	0.00442513	0.169147	GNAS-AS1
ENSG00000149218	463.748	0.429939	0.151087	2.84563	0.00443233	0.169147	ENDOD1
ENSG00000261654	31.0339	1.17255	0.412171	2.84482	0.00444361	0.1693	RP11-96K19.4
ENSG00000001561	390.543	1.01405	0.356584	2.84378	0.00445813	0.169576	ENPP4
ENSG00000100298	40.7816	-2.16805	0.762776	-2.84231	0.00447874	0.170083	APOBEC3H
ENSG00000104808	67.5783	1.02751	0.361668	2.84103	0.00449675	0.170489	DHDH
ENSG00000189229	182.362	-3.06215	1.07904	-2.83785	0.00454178	0.170533	AC069277.2
ENSG00000065618	41.8738	-1.09518	0.385754	-2.83906	0.00452463	0.170533	COL17A1
ENSG00000197291	79.9903	-0.834891	0.294052	-2.83926	0.00452182	0.170533	RAMP2-AS1
ENSG00000123329	95.7817	-0.761041	0.268125	-2.83838	0.00453431	0.170533	ARHGAP9
ENSG00000010165	2187.8	-0.328783	0.115751	-2.84043	0.00450531	0.170533	METTL13
ENSG00000227001	22.733	1.23681	0.435796	2.83806	0.00453886	0.170533	NBPF2P
ENSG00000255471	50.9753	0.922397	0.325132	2.83699	0.00455406	0.170719	RP11-736K20.5
ENSG00000207322	43.8987	-3.29839	1.1633	-2.83537	0.00457725	0.171247	RNU1-89P
ENSG00000220804	28.4254	1.25863	0.443963	2.83498	0.00458283	0.171247	AC093642.5
ENSG00000197712	822.327	0.441285	0.155772	2.83289	0.00461299	0.17195	FAM114A1
ENSG00000204740	27.0713	-1.50064	0.529765	-2.83265	0.0046164	0.17195	MALRD1
ENSG00000165730	195.818	-0.558391	0.197191	-2.83173	0.00462973	0.172171	STOX1
ENSG00000204291	19.1289	-1.4537	0.513711	-2.8298	0.00465774	0.172937	COL15A1
ENSG00000221829	1947.61	-0.3502	0.12379	-2.82898	0.00466966	0.173104	FANCG
ENSG00000173805	210.611	-0.664756	0.235032	-2.82837	0.00467859	0.17316	HAP1
ENSG00000169071	432.975	-0.88468	0.313146	-2.82514	0.00472603	0.174638	ROR2
ENSG00000163873	234.456	-1.09244	0.386942	-2.82326	0.00475379	0.174833	GRIK3
ENSG00000204344	220.842	-0.562028	0.199039	-2.8237	0.00474724	0.174833	STK19
ENSG00000170734	406.608	-0.561538	0.198879	-2.82351	0.00475004	0.174833	POLH
ENSG00000259932	155.375	-1.35412	0.480587	-2.81764	0.00483778	0.177621	CTD-2651B20.7
ENSG00000169035	44.4867	1.09209	0.387695	2.81687	0.00484942	0.177621	KLK7
ENSG00000138760	3174.33	0.512921	0.182102	2.81667	0.00485245	0.177621	SCARB2
ENSG00000196482	244.762	0.586046	0.208151	2.81548	0.00487045	0.178	ESRRG
ENSG00000164181	489.371	0.78496	0.278859	2.8149	0.00487922	0.178042	ELOVL7
ENSG00000228696	32.1535	-1.46363	0.520478	-2.8121	0.00492192	0.17904	ARL17B
ENSG00000260035	193.645	-1.18609	0.421743	-2.81234	0.00491824	0.17904	CTD-2651B20.6
ENSG00000205758	613.43	0.612099	0.217864	2.80955	0.00496111	0.180184	CRYZL1
ENSG00000043143	1611.18	-0.507015	0.180717	-2.80558	0.00502265	0.181223	JADE2
ENSG00000002746	323.483	-0.480611	0.171233	-2.80677	0.00500409	0.181223	HECW1
ENSG00000079112	12.1682	1.96982	0.702241	2.80505	0.00503095	0.181223	CDH17
ENSG00000128422	14.0255	-2.56435	0.914002	-2.80563	0.00502188	0.181223	KRT17
ENSG00000150593	1100.53	0.623711	0.222414	2.80428	0.00504286	0.181223	PDCD4
ENSG00000155792	223.001	0.976141	0.348161	2.80371	0.00505189	0.181223	DEPTOR
ENSG00000163347	148.244	1.00112	0.357018	2.80412	0.00504546	0.181223	CLDN1
ENSG00000185972	7.65181	-2.28611	0.814664	-2.8062	0.00501292	0.181223	CCIN
ENSG00000276368	10682.3	-0.709675	0.253466	-2.79988	0.00511212	0.182754	HIST1H2AJ
ENSG00000100297	12148.9	-0.398082	0.142222	-2.79901	0.00512591	0.182754	MCM5
ENSG00000203279	297.431	0.656559	0.234539	2.79936	0.0051204	0.182754	RP11-498P14.5
ENSG00000226383	426.378	0.74419	0.265764	2.80019	0.00510722	0.182754	AC093375.1
ENSG00000160345	159.566	-0.694673	0.248364	-2.79699	0.0051581	0.183394	C9orf116
ENSG00000141232	570.246	-0.55766	0.199385	-2.7969	0.00515959	0.183394	TOB1
ENSG00000268093	10.3016	-1.66995	0.597351	-2.7956	0.00518037	0.183852	AC022154.7
ENSG00000278318	232.288	-3.68995	1.32113	-2.79303	0.00522173	0.185038	ZNF229
ENSG00000132434	588.649	-0.511638	0.183325	-2.79088	0.00525652	0.185916	LANCL2
ENSG00000251661	23.1628	1.23622	0.443033	2.79036	0.00526487	0.185916	RP11-326C3.11
ENSG00000267547	41.4106	1.04745	0.375428	2.79002	0.00527041	0.185916	RP11-686D22.4
ENSG00000156395	114.422	-0.928718	0.333011	-2.78885	0.0052896	0.186311	SORCS3
ENSG00000186594	51.2745	-0.994713	0.356801	-2.78787	0.00530562	0.186312	MIR22HG
ENSG00000126070	2148.31	0.498805	0.178891	2.78832	0.00529817	0.186312	AGO3
ENSG00000124160	789.496	-0.704499	0.252868	-2.78604	0.00533567	0.186525	NCOA5
ENSG00000100023	1090.24	-0.439593	0.157761	-2.78645	0.00532887	0.186525	PPIL2
ENSG00000125246	445.793	0.576208	0.206798	2.78633	0.00533086	0.186525	CLYBL
ENSG00000147439	613.543	-0.45996	0.165136	-2.78534	0.00534717	0.186646	BIN3
ENSG00000141698	1821.39	-0.340334	0.122402	-2.78045	0.00542834	0.189134	NT5C3B
ENSG00000281383	5.00767	-5.45355	1.96166	-2.78007	0.00543465	0.189134	CH507-513H4.5
ENSG00000259172	39.5879	-0.878865	0.316345	-2.77819	0.00546629	0.189479	RP11-299G20.2
ENSG00000269825	147.577	-0.92844	0.334208	-2.77803	0.00546894	0.189479	CTD-3099C6.9
ENSG00000271788	4.54077	-4.28433	1.54212	-2.7782	0.00546609	0.189479	CTD-2201E18.5
ENSG00000196547	625.883	0.83754	0.301566	2.7773	0.00548123	0.189623	MAN2A2
ENSG00000278637	2462.62	-0.858565	0.309255	-2.77624	0.00549922	0.189963	HIST1H4A
ENSG00000223703	125.391	-1.64499	0.592853	-2.77471	0.00552514	0.190501	AC027612.4
ENSG00000107099	75.2906	-1.18367	0.426794	-2.7734	0.00554746	0.190501	DOCK8
ENSG00000124613	442.446	0.623499	0.224758	2.77409	0.00553568	0.190501	ZNF391
ENSG00000100784	316.111	0.640859	0.23104	2.7738	0.00554057	0.190501	RPS6KA5
ENSG00000197016	549.405	-1.04927	0.378566	-2.77171	0.00557627	0.190928	ZNF470
ENSG00000114473	365.3	-0.532518	0.192095	-2.77217	0.00556848	0.190928	IQCG
ENSG00000283078	56.9178	-0.926126	0.334406	-2.76947	0.0056148	0.191202	RP11-11M20.4
ENSG00000164542	34.1369	1.36293	0.491998	2.77019	0.00560243	0.191202	KIAA0895
ENSG00000166855	3011.87	0.419023	0.151308	2.76934	0.00561707	0.191202	CLPX
ENSG00000162378	2505.28	0.508094	0.183413	2.77022	0.00560176	0.191202	ZYG11B
ENSG00000011347	646.988	1.03509	0.373915	2.76824	0.00563596	0.191565	SYT7
ENSG00000260804	209.854	-0.535907	0.193717	-2.76644	0.00566716	0.192345	PKI55
ENSG00000198885	473.828	-0.583848	0.211257	-2.76369	0.00571525	0.193227	ITPRIPL1
ENSG00000173918	48.5722	-0.874625	0.316534	-2.76313	0.005725	0.193227	C1QTNF1
ENSG00000130433	73.842	0.761798	0.275709	2.76306	0.0057263	0.193227	CACNG6
ENSG00000249437	8.25019	2.08965	0.756114	2.76367	0.00571549	0.193227	NAIP
ENSG00000126458	248.878	0.647255	0.234357	2.76183	0.00574777	0.193392	RRAS
ENSG00000135828	124.105	0.889015	0.321884	2.76191	0.00574647	0.193392	RNASEL
ENSG00000122870	99.435	-1.05279	0.381385	-2.76044	0.00577241	0.19359	BICC1
ENSG00000272667	74.8089	-0.869373	0.315065	-2.75934	0.00579177	0.19359	RP11-395A13.2
ENSG00000104679	674.776	-0.517703	0.187716	-2.75791	0.00581714	0.19359	R3HCC1
ENSG00000169981	884.529	-0.452253	0.163848	-2.76021	0.0057765	0.19359	ZNF35
ENSG00000144724	9227.64	0.426106	0.154445	2.75894	0.00579892	0.19359	PTPRG
ENSG00000111275	850.776	0.460193	0.166805	2.75887	0.00580009	0.19359	ALDH2
ENSG00000257298	77.3114	0.833536	0.302212	2.75812	0.00581354	0.19359	RP3-405J10.3
ENSG00000185345	59.3663	1.08905	0.394905	2.75775	0.00582007	0.19359	PARK2
ENSG00000196867	445.507	-1.36886	0.496688	-2.75598	0.00585161	0.19381	ZFP28
ENSG00000104312	667.559	0.612485	0.222219	2.75623	0.00584719	0.19381	RIPK2
ENSG00000242580	5.11504	-3.14261	1.13992	-2.75686	0.00583587	0.19381	IGKV1D-43
ENSG00000133107	133.573	-0.925494	0.335938	-2.75495	0.00587005	0.19387	TRPC4
ENSG00000122687	1196.03	-0.456559	0.16572	-2.75499	0.00586935	0.19387	MRM2
ENSG00000253878	86.4543	-0.833848	0.303155	-2.75057	0.00594917	0.194921	RP11-347C18.3
ENSG00000155666	373.886	-0.526089	0.191276	-2.75041	0.00595203	0.194921	KDM8
ENSG00000164896	1199.89	-0.441134	0.160284	-2.75219	0.00591974	0.194921	FASTK
ENSG00000201699	12.5515	-2.98388	1.08446	-2.75149	0.0059325	0.194921	RNU1-59P
ENSG00000120539	2437.6	0.542789	0.197253	2.75174	0.005928	0.194921	MASTL
ENSG00000265766	19.5841	2.50833	0.911808	2.75094	0.00594249	0.194921	CXADRP3
ENSG00000238363	302.654	-1.15578	0.420446	-2.74893	0.00597893	0.19498	SNORA13
ENSG00000164236	833.103	-0.727142	0.264506	-2.74905	0.00597674	0.19498	ANKRD33B
ENSG00000188266	116.088	0.732376	0.266389	2.74927	0.00597278	0.19498	HYKK
ENSG00000146411	741.645	0.549154	0.199902	2.74712	0.00601218	0.195517	SLC2A12
ENSG00000272894	69.4105	0.856719	0.311814	2.74753	0.00600454	0.195517	RP5-1159O4.1
ENSG00000209042	105.09	-0.851243	0.310054	-2.74547	0.00604252	0.195958	SNORD12C
ENSG00000170345	314.732	-0.789269	0.287438	-2.74587	0.00603503	0.195958	FOS
ENSG00000266680	60.579	-0.805625	0.293594	-2.74402	0.00606928	0.196552	RP5-1148A21.3
ENSG00000128228	375.266	-0.508542	0.185395	-2.74302	0.00608775	0.196604	SDF2L1
ENSG00000054148	1278.29	-0.436479	0.159111	-2.74324	0.00608356	0.196604	PHPT1
ENSG00000270933	119.452	0.719221	0.262328	2.74169	0.00611249	0.19713	CTD-2227E11.1
ENSG00000005421	11.3416	1.7996	0.65654	2.74104	0.00612446	0.197243	PON1
ENSG00000138496	250.221	-0.970063	0.354228	-2.73853	0.00617152	0.197963	PARP9
ENSG00000111846	4311.49	0.479389	0.175006	2.73928	0.00615742	0.197963	GCNT2
ENSG00000124171	1713.76	0.517215	0.188869	2.73849	0.00617229	0.197963	PARD6B
ENSG00000174456	486.909	0.520896	0.190316	2.737	0.00620015	0.198311	C12orf76
ENSG00000230098	4.09718	-4.39955	1.60727	-2.73727	0.00619506	0.198311	TCERG1L-AS1
ENSG00000245694	232.888	0.848452	0.310505	2.73249	0.00628572	0.200498	CRNDE
ENSG00000260740	17.2547	1.90877	0.698472	2.73278	0.00628029	0.200498	AC026471.6
ENSG00000112218	1313.95	0.442082	0.161863	2.73122	0.00631005	0.200757	GPR63
ENSG00000148158	2333.57	0.608568	0.222897	2.73027	0.00632826	0.200757	SNX30
ENSG00000023608	382.204	0.664603	0.243406	2.73044	0.00632508	0.200757	SNAPC1
ENSG00000269964	21.3834	-1.91603	0.701599	-2.73095	0.00631524	0.200757	MEI4
ENSG00000143217	10.1141	-1.95841	0.71782	-2.72827	0.00636681	0.201705	NECTIN4
ENSG00000095139	7713.47	0.361408	0.132506	2.72748	0.00638198	0.201775	ARCN1
ENSG00000168795	1378.61	0.395902	0.145212	2.72636	0.00640362	0.201775	ZBTB5
ENSG00000088002	63.2528	0.788744	0.2893	2.72639	0.00640316	0.201775	SULT2B1
ENSG00000180318	27.7503	1.40302	0.514486	2.72702	0.00639085	0.201775	ALX1
ENSG00000234444	1310.86	2.50242	0.918099	2.72566	0.0064173	0.201933	ZNF736
ENSG00000146094	60.3438	-0.855554	0.31406	-2.72417	0.00644624	0.202077	DOK3
ENSG00000168389	686.591	-0.619282	0.227263	-2.72495	0.00643107	0.202077	MFSD2A
ENSG00000152078	208.26	0.696298	0.255638	2.72376	0.00645429	0.202077	TMEM56
ENSG00000165312	439.634	0.708852	0.260258	2.72365	0.00645654	0.202077	OTUD1
ENSG00000188747	89.9396	0.88473	0.325276	2.71994	0.00652941	0.20381	NOXA1
ENSG00000235026	48.2932	-0.803356	0.295323	-2.72026	0.00652307	0.20381	DPP10-AS1
ENSG00000171105	4026.21	0.565027	0.207962	2.71697	0.0065883	0.205373	INSR
ENSG00000117020	2458.87	0.38653	0.142405	2.7143	0.00664169	0.205937	AKT3
ENSG00000153234	29.6232	1.04642	0.385497	2.71447	0.00663817	0.205937	NR4A2
ENSG00000248810	12.1707	-1.55899	0.574361	-2.7143	0.00664163	0.205937	RP11-362F19.1
ENSG00000261143	8.06734	-2.64263	0.973492	-2.71459	0.00663588	0.205937	ADAMTS7P3
ENSG00000162946	136.696	-0.665091	0.245186	-2.71259	0.00667588	0.206201	DISC1
ENSG00000122783	1121.2	-0.529166	0.19508	-2.71255	0.00667674	0.206201	C7orf49
ENSG00000260063	22.7482	-1.16962	0.431115	-2.71302	0.00666731	0.206201	RP5-968P14.2
ENSG00000185304	80.9099	-2.61174	0.963731	-2.71003	0.00672768	0.206736	RGPD2
ENSG00000212195	285.33	-1.21631	0.448783	-2.71024	0.00672345	0.206736	U3
ENSG00000152256	1349.02	-0.890088	0.328435	-2.71009	0.00672647	0.206736	PDK1
ENSG00000169683	1051.47	-0.512149	0.188989	-2.70994	0.00672953	0.206736	LRRC45
ENSG00000261512	72.7467	-0.899553	0.332286	-2.70717	0.00678602	0.207923	RP11-46D6.1
ENSG00000221866	150.194	-0.730786	0.269926	-2.70736	0.00678205	0.207923	PLXNA4
ENSG00000250616	134.103	-2.78966	1.03156	-2.70431	0.00684456	0.208383	RP11-455F5.3
ENSG00000166822	2597.35	0.607579	0.224586	2.70532	0.00682376	0.208383	TMEM170A
ENSG00000179455	5.09501	3.729	1.37894	2.70426	0.00684572	0.208383	MKRN3
ENSG00000232063	35.1949	-2.08319	0.769974	-2.70554	0.00681941	0.208383	RP11-307E17.8
ENSG00000112679	1581.14	0.672232	0.248527	2.70486	0.00683322	0.208383	DUSP22
ENSG00000171885	184.607	0.961058	0.355448	2.7038	0.00685526	0.208402	AQP4
ENSG00000196353	109.426	0.5852	0.216669	2.7009	0.00691529	0.209953	CPNE4
ENSG00000221955	456.192	-0.43029	0.159388	-2.69964	0.0069415	0.210203	SLC12A8
ENSG00000117335	7658.45	0.64467	0.238799	2.69963	0.00694156	0.210203	CD46
ENSG00000131370	451.504	0.537106	0.199005	2.69896	0.00695568	0.210357	SH3BP5
ENSG00000128294	2762.53	0.416795	0.154472	2.69819	0.0069718	0.210572	TPST2
ENSG00000188573	184.008	-0.90314	0.334984	-2.69607	0.0070163	0.210603	FBLL1
ENSG00000172531	6173.19	-0.395152	0.146585	-2.69572	0.00702371	0.210603	PPP1CA
ENSG00000156687	5982.98	0.44558	0.165232	2.6967	0.00700312	0.210603	UNC5D
ENSG00000166900	3636.28	0.484797	0.179722	2.69748	0.00698671	0.210603	STX3
ENSG00000204257	120.25	0.842143	0.312406	2.69567	0.00702469	0.210603	HLA-DMA
ENSG00000275764	196.775	0.936334	0.347361	2.69556	0.00702702	0.210603	RP11-582E3.6
ENSG00000204438	982.948	-0.530561	0.196907	-2.69447	0.00705006	0.210752	GPANK1
ENSG00000280083	5.25009	-2.66557	0.989264	-2.69449	0.00704957	0.210752	RP11-317J9.1
ENSG00000073111	9752.3	-0.363882	0.135111	-2.6932	0.00707689	0.211261	MCM2
ENSG00000166473	286.498	1.24566	0.462587	2.69281	0.00708523	0.211261	PKD1L2
ENSG00000176125	130.661	-0.759111	0.282093	-2.691	0.00712392	0.211603	UFSP1
ENSG00000177963	2255.13	-0.452064	0.16798	-2.69117	0.00712022	0.211603	RIC8A
ENSG00000179344	333.046	2.80704	1.04309	2.69107	0.00712222	0.211603	HLA-DQB1
ENSG00000121274	1411.43	0.41583	0.15459	2.68989	0.00714751	0.211868	PAPD5
ENSG00000111199	173.639	0.654102	0.243185	2.68973	0.00715102	0.211868	TRPV4
ENSG00000260518	10.1652	-2.4982	0.929269	-2.68835	0.00718069	0.212477	BMS1P8
ENSG00000156113	223.329	-0.664751	0.24746	-2.6863	0.0072249	0.213514	KCNMA1
ENSG00000275714	7602.07	-0.845702	0.315045	-2.68438	0.00726636	0.214468	HIST1H3A
ENSG00000172575	300.646	0.485364	0.180843	2.68389	0.00727711	0.214514	RASGRP1
ENSG00000109113	4562.44	-0.424219	0.158279	-2.68019	0.00735795	0.215806	RAB34
ENSG00000185215	370.925	0.61902	0.230916	2.68071	0.00734663	0.215806	TNFAIP2
ENSG00000149451	252.762	0.747482	0.278815	2.68092	0.00734195	0.215806	ADAM33
ENSG00000163958	50.0958	1.01371	0.378165	2.6806	0.007349	0.215806	ZDHHC19
ENSG00000137872	264.519	-1.09381	0.408173	-2.67977	0.00736724	0.215806	SEMA6D
ENSG00000259802	107.694	-0.645419	0.241004	-2.67805	0.0074053	0.215837	CTD-2256P15.2
ENSG00000188191	1230.03	-0.429221	0.160266	-2.67819	0.00740215	0.215837	PRKAR1B
ENSG00000119684	1672.65	0.500609	0.18688	2.67878	0.0073891	0.215837	MLH3
ENSG00000133687	2215.86	0.623317	0.232664	2.67904	0.00738337	0.215837	TMTC1
ENSG00000151320	63.6995	0.794594	0.296779	2.67739	0.00741973	0.215987	AKAP6
ENSG00000278828	10190	-0.732999	0.273837	-2.67677	0.00743363	0.216122	HIST1H3H
ENSG00000167981	348.318	-1.05555	0.394779	-2.67379	0.00750005	0.216477	ZNF597
ENSG00000224886	23.179	1.41269	0.528033	2.67538	0.00746441	0.216477	RP11-119F19.4
ENSG00000235749	8.14997	-4.1784	1.56284	-2.67358	0.00750455	0.216477	RP11-634B7.4
ENSG00000266965	22.5068	-1.162	0.434421	-2.67483	0.00747679	0.216477	RP11-712P20.2
ENSG00000269887	38.7298	1.25694	0.470155	2.67346	0.00750739	0.216477	RP11-477H21.2
ENSG00000272462	89.5682	0.902367	0.337547	2.6733	0.00751081	0.216477	U91328.19
ENSG00000269974	52.2431	1.32341	0.494826	2.67451	0.00748394	0.216477	RP11-932O9.10
ENSG00000110442	600.908	-0.542511	0.202988	-2.67262	0.00752611	0.21665	COMMD9
ENSG00000059728	116.754	0.752258	0.281517	2.67215	0.0075366	0.216684	MXD1
ENSG00000140057	324.554	0.463706	0.173598	2.67114	0.00755937	0.217071	AK7
ENSG00000013588	39.1426	1.51097	0.56588	2.67012	0.00758235	0.217327	GPRC5A
ENSG00000157168	98.2027	-0.780672	0.292485	-2.6691	0.00760555	0.217327	NRG1
ENSG00000044574	11161.3	-0.406251	0.152192	-2.66934	0.00760013	0.217327	HSPA5
ENSG00000135778	2277.04	-0.36901	0.138245	-2.66925	0.00760204	0.217327	NTPCR
ENSG00000280088	125.271	0.635082	0.238051	2.66784	0.00763411	0.217876	RP11-135F9.3
ENSG00000081177	1521.91	0.34655	0.129922	2.66737	0.00764485	0.217916	EXD2
ENSG00000213638	102.613	-0.72649	0.272444	-2.66656	0.00766319	0.218172	ADAT3
ENSG00000177425	12127.6	0.593257	0.222598	2.66515	0.00769537	0.218288	PAWR
ENSG00000159374	311.302	0.609967	0.228858	2.66526	0.00769286	0.218288	M1AP
ENSG00000267871	37.0556	1.02344	0.383916	2.66579	0.00768071	0.218288	CTC-444N24.6
ENSG00000274559	25.684	-1.11009	0.416605	-2.66461	0.00770766	0.218371	CH507-42P11.1
ENSG00000160117	266.3	0.544271	0.20439	2.66291	0.0077469	0.218421	ANKLE1
ENSG00000161912	416.613	0.717409	0.269346	2.66353	0.00773266	0.218421	ADCY10P1
ENSG00000170324	9.48164	-1.91547	0.719156	-2.66349	0.00773342	0.218421	FRMPD2
ENSG00000206652	42.4891	-1.31062	0.492113	-2.66325	0.00773892	0.218421	RNU1-1
ENSG00000232442	64.6148	0.798753	0.300227	2.66049	0.00780266	0.219728	CTD-3184A7.4
ENSG00000170113	1185.11	0.886235	0.333205	2.65973	0.0078204	0.219962	NIPA1
ENSG00000127903	184.658	-3.57582	1.34629	-2.65606	0.00790599	0.220507	ZNF835
ENSG00000139722	310.493	-0.877965	0.330319	-2.65793	0.00786213	0.220507	VPS37B
ENSG00000162461	21.8111	-1.40805	0.530007	-2.65667	0.0078917	0.220507	SLC25A34
ENSG00000173421	6.28797	3.40879	1.2828	2.6573	0.00787682	0.220507	CCDC36
ENSG00000203814	11531.1	-0.694662	0.261327	-2.65821	0.00785578	0.220507	HIST2H2BF
ENSG00000182473	4258.1	-0.491224	0.184892	-2.65682	0.00788823	0.220507	EXOC7
ENSG00000280347	56.8069	0.894088	0.336619	2.65608	0.00790537	0.220507	AC000123.2
ENSG00000106714	286.594	0.754971	0.284424	2.65439	0.00794525	0.221337	CNTNAP3
ENSG00000100664	8487.34	-0.805971	0.303825	-2.65275	0.00798389	0.222006	EIF5
ENSG00000101443	391.965	0.464822	0.175235	2.65256	0.00798829	0.222006	WFDC2
ENSG00000250234	8.23608	-1.95131	0.735908	-2.65157	0.00801187	0.222396	CTD-2024P10.1
ENSG00000185130	9137.34	-0.652122	0.246005	-2.65085	0.00802889	0.222604	HIST1H2BL
ENSG00000136827	1222.54	-0.350775	0.132406	-2.64924	0.00806736	0.223405	TOR1A
ENSG00000207217	357.873	-0.719562	0.2718	-2.6474	0.00811141	0.224358	SNORA42
ENSG00000274376	17.1344	-2.10294	0.795162	-2.64467	0.00817694	0.225903	ADAMTS7P1
ENSG00000176244	531.646	0.686311	0.259552	2.64421	0.00818817	0.225945	ACBD7
ENSG00000260625	26.4912	1.09766	0.41528	2.64317	0.00821331	0.226371	RP11-452L6.7
ENSG00000132199	1332.26	-0.453029	0.171447	-2.64239	0.00823239	0.226629	ENOSF1
ENSG00000112234	1650.33	0.476156	0.180302	2.64088	0.00826921	0.226839	FBXL4
ENSG00000166796	10.1798	-2.19036	0.829398	-2.64091	0.00826839	0.226839	LDHC
ENSG00000261716	464.944	0.702975	0.266138	2.6414	0.00825644	0.226839	RP11-196G18.22
ENSG00000136267	238.884	0.696227	0.26385	2.63872	0.00832185	0.227747	DGKB
ENSG00000258451	26.0231	1.6007	0.606565	2.63896	0.00831606	0.227747	RP11-903H12.3
ENSG00000133519	24.5718	1.33905	0.507756	2.63719	0.0083597	0.228515	ZDHHC8P1
ENSG00000279175	18.9933	1.36471	0.517774	2.63573	0.00839566	0.229229	CTA-414D7.1
ENSG00000184319	264.607	-0.54881	0.208339	-2.63422	0.00843318	0.229984	RPL23AP82
ENSG00000214837	20.1779	-1.54804	0.588013	-2.63266	0.00847191	0.23077	LINC01347
ENSG00000227258	34.9169	-1.25524	0.476899	-2.63209	0.00848621	0.23089	SMIM2-AS1
ENSG00000232265	5.95154	-2.56098	0.973159	-2.63161	0.00849801	0.230942	XXyac-YX155B6.5
ENSG00000078237	621.431	-0.579531	0.220357	-2.62996	0.00853948	0.23111	TIGAR
ENSG00000189007	990.755	0.426643	0.162173	2.63079	0.00851872	0.23111	ADAT2
ENSG00000150627	343.049	0.791306	0.300901	2.62979	0.00854384	0.23111	WDR17
ENSG00000235558	5.70571	2.72062	1.03449	2.62992	0.00854058	0.23111	RP11-1198D22.1
ENSG00000100580	2031.58	0.401483	0.15276	2.62819	0.00858405	0.231502	TMED8
ENSG00000262001	1039.73	0.690958	0.262919	2.62803	0.00858812	0.231502	DLGAP1-AS2
ENSG00000274386	22.1463	1.16175	0.442024	2.62824	0.00858273	0.231502	RP5-994D16.11
ENSG00000095627	42.1433	-1.74255	0.663302	-2.62708	0.00861214	0.231881	TDRD1
ENSG00000134398	70.2961	0.954955	0.363701	2.62566	0.00864812	0.232582	ERN2
ENSG00000187079	5436.12	0.394649	0.150356	2.62476	0.00867091	0.232658	TEAD1
ENSG00000211451	56.313	0.898543	0.342315	2.6249	0.00866744	0.232658	GNRHR2
ENSG00000125347	255.111	-0.545746	0.208031	-2.62339	0.00870594	0.233329	IRF1
ENSG00000278463	6317.33	-0.71733	0.2738	-2.61991	0.00879532	0.234646	HIST1H2AB
ENSG00000168077	491.103	-0.594275	0.22679	-2.62038	0.0087832	0.234646	SCARA3
ENSG00000125826	1246.63	-0.40487	0.154509	-2.62037	0.00878353	0.234646	RBCK1
ENSG00000164171	795.39	0.363389	0.138696	2.62004	0.00879198	0.234646	ITGA2
ENSG00000187531	489.776	-0.495556	0.189212	-2.61905	0.00881749	0.234969	SIRT7
ENSG00000269118	5.85267	-3.53081	1.34856	-2.6182	0.00883949	0.235286	FAM90A28P
ENSG00000266538	30.4978	0.972206	0.371485	2.61708	0.0088686	0.235791	RP11-385D13.3
ENSG00000103811	778.172	0.423292	0.161829	2.61568	0.00890494	0.236488	CTSH
ENSG00000260948	118.266	0.885868	0.338751	2.6151	0.00892016	0.236623	RP11-552M11.8
ENSG00000139410	33.8345	-1.94614	0.744883	-2.61268	0.00898342	0.23803	SDSL
ENSG00000123739	1632.25	0.370511	0.141904	2.61099	0.00902801	0.238129	PLA2G12A
ENSG00000186868	86.6667	0.719407	0.275486	2.61141	0.00901694	0.238129	MAPT
ENSG00000204538	12.9561	-1.82946	0.700465	-2.61178	0.00900722	0.238129	PSORS1C2
ENSG00000279619	93.1853	1.04975	0.402005	2.61128	0.00902035	0.238129	CTD-2527I21.5
ENSG00000162144	671.026	-0.467183	0.178958	-2.61057	0.00903924	0.238156	CYB561A3
ENSG00000185085	929.14	-0.5831	0.223473	-2.60926	0.00907391	0.238313	INTS5
ENSG00000136490	1667.61	-0.434853	0.166662	-2.60918	0.00907585	0.238313	LIMD2
ENSG00000135740	228.403	0.717865	0.275126	2.60922	0.00907488	0.238313	SLC9A5
ENSG00000231365	251.092	-0.528617	0.202678	-2.60816	0.00910295	0.238342	RP11-418J17.1
ENSG00000086475	31697.1	-0.3988	0.152915	-2.60799	0.00910763	0.238342	SEPHS1
ENSG00000241644	59.0121	1.18662	0.454864	2.60874	0.00908753	0.238342	INMT
ENSG00000099812	17.5867	1.26298	0.484363	2.60752	0.00912011	0.238401	MISP
ENSG00000136052	140.768	0.715287	0.274371	2.60701	0.00913372	0.238489	SLC41A2
ENSG00000186047	110.175	-0.691659	0.265483	-2.60528	0.00917986	0.239159	DLEU7
ENSG00000112146	739.289	-0.437076	0.167754	-2.60546	0.00917518	0.239159	FBXO9
ENSG00000165879	178.653	-0.841625	0.323277	-2.60342	0.00922992	0.240194	FRAT1
ENSG00000161547	10617.5	-0.530846	0.204104	-2.60086	0.00929901	0.241722	SRSF2
ENSG00000198547	19.4987	1.91009	0.734551	2.60035	0.00931279	0.241811	C20orf203
ENSG00000039139	116.75	0.917915	0.353267	2.59836	0.009367	0.242948	DNAH5
ENSG00000280852	24.24	1.28226	0.493565	2.59795	0.00937811	0.242966	CTD-2319I12.10
ENSG00000172336	1358.48	-0.406719	0.156618	-2.59688	0.00940736	0.243453	POP7
ENSG00000117481	683.787	-0.363552	0.140017	-2.59648	0.00941853	0.243472	NSUN4
ENSG00000189431	97.1369	-0.733135	0.282442	-2.5957	0.00943981	0.243482	RASSF10
ENSG00000104093	2065.57	0.643278	0.247815	2.5958	0.009437	0.243482	DMXL2
ENSG00000111788	611.337	-0.502866	0.193958	-2.59266	0.0095238	0.244836	RP11-22B23.1
ENSG00000278959	10.0194	1.76723	0.681614	2.59272	0.0095221	0.244836	RP11-455I9.1
ENSG00000279419	18.8598	1.43464	0.553253	2.5931	0.00951153	0.244836	RP5-907C10.3
ENSG00000111670	2850.68	0.374183	0.144392	2.59144	0.00955753	0.244996	GNPTAB
ENSG00000105357	1094.89	0.616119	0.237765	2.5913	0.00956154	0.244996	MYH14
ENSG00000267353	5.8714	-4.21191	1.62505	-2.59186	0.00954594	0.244996	CTD-2162K18.3
ENSG00000105519	81.8876	0.849794	0.328259	2.58879	0.00963139	0.24603	CAPS
ENSG00000230561	19.1138	1.50663	0.58196	2.5889	0.00962832	0.24603	CCDC192
ENSG00000261235	30.5626	1.04993	0.405578	2.58871	0.00963356	0.24603	RP11-510J16.5
ENSG00000138942	995.964	-0.351048	0.135716	-2.58663	0.00969183	0.246978	RNF185
ENSG00000006740	1211.83	0.496282	0.19186	2.58669	0.00969029	0.246978	ARHGAP44
ENSG00000091436	1562.59	0.382087	0.147885	2.58368	0.00977529	0.248749	AC013461.1
ENSG00000168807	1559.06	0.400806	0.155146	2.58342	0.00978269	0.248749	SNTB2
ENSG00000101751	1818.06	0.519005	0.20095	2.58276	0.00980141	0.248954	POLI
ENSG00000260920	183.061	0.564464	0.218648	2.5816	0.00983421	0.249515	RP1-228H13.5
ENSG00000183621	131.717	0.656501	0.254558	2.57898	0.00990927	0.250601	ZNF438
ENSG00000227214	46.1156	-0.752779	0.29184	-2.57943	0.00989643	0.250601	HCG15
ENSG00000273335	15.8554	-1.35561	0.525637	-2.57899	0.00990897	0.250601	RP11-61L19.2
ENSG00000186615	253.119	0.447878	0.173731	2.578	0.00993732	0.251039	KTN1-AS1
ENSG00000277007	34.8815	0.985216	0.382228	2.57756	0.00995013	0.25109	RP11-392O17.2
ENSG00000266066	23.3329	-1.71478	0.6656	-2.57629	0.0099868	0.251743	POLRMTP1
ENSG00000155542	237.255	-0.922418	0.358302	-2.57441	0.010041	0.252598	SETD9
ENSG00000197785	1758.13	-0.386901	0.150312	-2.57399	0.0100532	0.252598	ATAD3A
ENSG00000244687	309.47	0.509482	0.197931	2.57404	0.0100518	0.252598	UBE2V1
ENSG00000197261	260.373	-0.896679	0.348504	-2.57294	0.010084	0.2529	C6orf141
ENSG00000239305	507.245	0.451385	0.175519	2.57172	0.0101195	0.2529	RNF103
ENSG00000281195	309.049	0.52668	0.204753	2.57227	0.0101035	0.2529	ZNF638-IT1
ENSG00000268812	8.61324	-2.08159	0.80914	-2.5726	0.0100938	0.2529	RP1-102K2.8
ENSG00000164659	2462.85	0.566236	0.220151	2.57204	0.0101101	0.2529	KIAA1324L
ENSG00000261150	941.413	-0.665085	0.258887	-2.56902	0.0101986	0.254606	EPPK1
ENSG00000137968	232.279	0.583448	0.227177	2.56825	0.0102213	0.254898	SLC44A5
ENSG00000171084	70.1384	-1.26609	0.493254	-2.56681	0.0102639	0.255413	FAM86JP
ENSG00000165816	124.695	-0.617722	0.24065	-2.56689	0.0102616	0.255413	VWA2
ENSG00000238083	164.183	0.713801	0.278364	2.56427	0.0103393	0.257017	LRRC37A2
ENSG00000237301	5.76094	-2.35306	0.91847	-2.56193	0.0104092	0.257656	RP4-680D5.2
ENSG00000269896	14.3285	-1.39209	0.543307	-2.56226	0.0103994	0.257656	RP4-740C4.5
ENSG00000272824	8.01425	2.17912	0.850455	2.5623	0.0103981	0.257656	RP6-74O6.6
ENSG00000278703	6.05143	2.20524	0.860487	2.56278	0.0103838	0.257656	RP11-706P11.2
ENSG00000055813	15.3347	1.48292	0.57911	2.56069	0.0104464	0.258076	CCDC85A
ENSG00000116874	604.961	-0.537904	0.210072	-2.56057	0.01045	0.258076	WARS2
ENSG00000270015	408.213	0.523812	0.204652	2.55952	0.0104815	0.258076	RP11-540B6.6
ENSG00000255240	48.9681	0.802961	0.313697	2.55967	0.0104771	0.258076	RP11-142C4.6
ENSG00000165476	1585.76	0.602861	0.235494	2.55998	0.0104677	0.258076	REEP3
ENSG00000076344	25.2564	1.24107	0.485251	2.55758	0.0105403	0.258983	RGS11
ENSG00000184669	28.6243	-0.954223	0.373129	-2.55735	0.0105473	0.258983	OR7E14P
ENSG00000221676	960.466	-0.837862	0.327674	-2.557	0.010558	0.258983	RNU6ATAC
ENSG00000223745	604.443	0.60285	0.23578	2.55684	0.0105628	0.258983	CCDC18-AS1
ENSG00000152137	365.771	0.562656	0.220099	2.55638	0.0105768	0.259053	HSPB8
ENSG00000203685	65.3253	0.756419	0.29596	2.55582	0.0105939	0.2592	STUM
ENSG00000003137	13.6521	1.58527	0.620674	2.55412	0.0106458	0.260197	CYP26B1
ENSG00000226792	597.28	-0.813506	0.319251	-2.54817	0.0108288	0.26115	LINC00371
ENSG00000275713	14165.1	-0.581788	0.228103	-2.55055	0.0107554	0.26115	HIST1H2BH
ENSG00000113212	20.4784	1.2507	0.491056	2.54695	0.0108669	0.26115	PCDHB7
ENSG00000116717	508.521	-0.523695	0.205544	-2.54786	0.0108387	0.26115	GADD45A
ENSG00000033011	1023.45	-0.502579	0.197288	-2.54744	0.0108517	0.26115	ALG1
ENSG00000141076	1308.83	-0.468221	0.183594	-2.5503	0.010763	0.26115	UTP4
ENSG00000148290	523.284	-0.402107	0.157568	-2.55196	0.0107118	0.26115	SURF1
ENSG00000176406	1979.49	-0.290116	0.113817	-2.54898	0.0108039	0.26115	RIMS2
ENSG00000117305	752.418	0.359739	0.141129	2.549	0.0108032	0.26115	HMGCL
ENSG00000173889	1798.66	0.390965	0.15321	2.55182	0.0107162	0.26115	PHC3
ENSG00000138032	3838.74	0.417679	0.163972	2.54726	0.0108574	0.26115	PPM1B
ENSG00000131375	1164.36	0.501592	0.196923	2.54714	0.0108608	0.26115	CAPN7
ENSG00000048405	325.537	0.62706	0.245947	2.54957	0.0107855	0.26115	ZNF800
ENSG00000128039	1483.08	0.643252	0.252295	2.5496	0.0107845	0.26115	SRD5A3
ENSG00000146833	856.979	0.710486	0.278985	2.54668	0.0108752	0.26115	TRIM4
ENSG00000272472	17.8155	-2.0627	0.808465	-2.55138	0.0107298	0.26115	RP11-95G17.2
ENSG00000272316	193.088	0.749886	0.294376	2.54737	0.0108538	0.26115	XXbac-BPGBPG55C20.2
ENSG00000255983	23.7953	1.28976	0.506571	2.54607	0.0108944	0.261343	RP11-1038A11.1
ENSG00000100162	639.374	-0.421734	0.165763	-2.5442	0.0109529	0.262311	CENPM
ENSG00000234791	7.91651	-1.73897	0.68354	-2.54406	0.0109573	0.262311	AC108448.3
ENSG00000267106	170.711	-0.567115	0.222986	-2.54327	0.0109819	0.262455	ZNF561-AS1
ENSG00000111912	480.347	0.390959	0.153738	2.54301	0.0109901	0.262455	NCOA7
ENSG00000117479	1726.86	0.529552	0.208256	2.54279	0.0109971	0.262455	SLC19A2
ENSG00000069702	266.383	-0.415273	0.163372	-2.54189	0.0110256	0.262867	TGFBR3
ENSG00000239128	29.3013	-4.28994	1.68819	-2.54114	0.011049	0.263157	SNORD13P3
ENSG00000121898	414.181	0.922209	0.363	2.54052	0.0110689	0.263324	CPXM2
ENSG00000267898	8.65372	-1.85279	0.729387	-2.54021	0.0110787	0.263324	CTD-2639E6.9
ENSG00000182853	9.11315	1.91845	0.755809	2.53827	0.0111402	0.26398	VMO1
ENSG00000197355	265.972	1.23205	0.485346	2.5385	0.0111329	0.26398	UAP1L1
ENSG00000198178	13.1977	1.38672	0.546251	2.53862	0.0111291	0.26398	CLEC4C
ENSG00000207280	78.9054	-0.775317	0.305546	-2.53748	0.0111654	0.264307	SNORD20
ENSG00000214077	62.0577	-0.791616	0.312314	-2.53468	0.0112551	0.264317	GNAQP1
ENSG00000112578	675.853	-0.473426	0.186825	-2.53407	0.0112748	0.264317	BYSL
ENSG00000113303	17.5981	1.38378	0.546167	2.53362	0.0112892	0.264317	BTNL8
ENSG00000130768	1375.45	-0.463598	0.182757	-2.53668	0.0111908	0.264317	SMPDL3B
ENSG00000055332	4164.35	0.48576	0.191709	2.53384	0.0112819	0.264317	EIF2AK2
ENSG00000138075	4.12104	-3.41341	1.34592	-2.53612	0.0112087	0.264317	ABCG5
ENSG00000198535	9.92136	2.14711	0.847192	2.53438	0.0112646	0.264317	C2CD4A
ENSG00000124743	69.4544	0.763752	0.301406	2.53397	0.011278	0.264317	KLHL31
ENSG00000229591	5.73626	-2.13602	0.842694	-2.53475	0.0112528	0.264317	RP5-981O7.2
ENSG00000259291	122.714	0.787959	0.31091	2.53436	0.0112652	0.264317	RP11-617F23.1
ENSG00000260362	126.258	3.24288	1.28009	2.53332	0.0112988	0.264317	RP11-297M9.1
ENSG00000261621	3.85665	3.05535	1.20611	2.53323	0.0113018	0.264317	RP11-580I1.2
ENSG00000139351	4.12991	3.36999	1.33066	2.53257	0.011323	0.264548	SYCP3
ENSG00000122481	114.201	0.511267	0.202083	2.52999	0.0114066	0.266202	RWDD3
ENSG00000277511	17.4109	1.38516	0.547562	2.52968	0.0114167	0.266202	CTD-2095E4.5
ENSG00000233426	98.903	-0.698659	0.276342	-2.52824	0.0114635	0.266575	EIF3FP3
ENSG00000226900	25.3435	1.01554	0.401615	2.52863	0.0114507	0.266575	RP11-432J24.5
ENSG00000040633	1936.44	-0.356581	0.141064	-2.52779	0.0114784	0.266575	PHF23
ENSG00000250658	3.85872	-5.28369	2.08996	-2.52813	0.0114673	0.266575	RP11-138B4.1
ENSG00000168148	8.59847	-1.73757	0.687516	-2.52731	0.0114939	0.26667	HIST3H3
ENSG00000099974	27.8108	-1.45035	0.57403	-2.52661	0.0115169	0.266682	DDTL
ENSG00000166446	301.364	-0.454649	0.179945	-2.5266	0.0115173	0.266682	CDYL2
ENSG00000172123	933.934	0.742758	0.29404	2.52604	0.0115356	0.266841	SLFN12
ENSG00000167118	1182.23	-0.415098	0.164451	-2.52414	0.011598	0.267754	URM1
ENSG00000233954	542.225	0.568501	0.225224	2.52416	0.0115976	0.267754	UQCRHL
ENSG00000175567	361.499	-0.668948	0.265106	-2.52332	0.0116252	0.267994	UCP2
ENSG00000259045	8.8249	-2.51617	0.997242	-2.52313	0.0116314	0.267994	MTCO1P2
ENSG00000241556	56.6876	-1.69993	0.673915	-2.52247	0.0116535	0.268237	RP11-490G8.1
ENSG00000196747	11321.7	-0.613846	0.243452	-2.52143	0.011688	0.268501	HIST1H2AI
ENSG00000167608	145.25	0.861352	0.341579	2.52168	0.0116797	0.268501	TMC4
ENSG00000233966	151.644	-0.670999	0.266257	-2.52012	0.0117314	0.269234	UBE2SP1
ENSG00000197989	937.618	-0.424374	0.168454	-2.51923	0.0117611	0.269385	SNHG12
ENSG00000116761	1172.62	0.491717	0.195161	2.51954	0.0117508	0.269385	CTH
ENSG00000030419	512.545	0.722662	0.287086	2.51723	0.0118283	0.270657	IKZF2
ENSG00000184144	90.3851	-1.05729	0.420389	-2.51503	0.0119022	0.271548	CNTN2
ENSG00000185619	2500.42	-0.43274	0.172057	-2.51509	0.0119001	0.271548	PCGF3
ENSG00000115318	429.757	0.688378	0.273672	2.51534	0.0118918	0.271548	LOXL3
ENSG00000260941	42.3086	1.10863	0.440978	2.51402	0.0119363	0.272061	LINC00622
ENSG00000067836	655.948	-0.489323	0.194717	-2.513	0.011971	0.272363	ROGDI
ENSG00000112619	46.0489	-1.13116	0.450133	-2.51294	0.0119729	0.272363	PRPH2
ENSG00000162511	13.0492	1.44518	0.575282	2.51212	0.0120007	0.27273	LAPTM5
ENSG00000130528	309.242	0.774775	0.308478	2.5116	0.0120184	0.27275	HRC
ENSG00000123095	93.2041	1.5799	0.62909	2.51141	0.012025	0.27275	BHLHE41
ENSG00000268655	11.1564	1.85103	0.737261	2.51068	0.01205	0.273051	CTB-60B18.10
ENSG00000272812	26.904	0.969517	0.386379	2.50924	0.0120991	0.273897	RP5-855D21.3
ENSG00000090339	379.58	1.22834	0.489628	2.50872	0.0121171	0.274039	ICAM1
ENSG00000278099	68.3276	-1.24826	0.497654	-2.50829	0.0121316	0.274102	U1
ENSG00000130706	3759.73	-0.373764	0.149148	-2.50599	0.0122108	0.275625	ADRM1
ENSG00000187778	2981.85	-0.400475	0.159849	-2.50533	0.0122337	0.275875	MCRS1
ENSG00000274292	54.6475	-0.84105	0.335809	-2.50455	0.0122607	0.276215	RP11-347I19.7
ENSG00000270820	35.0343	-0.950104	0.379624	-2.50275	0.0123232	0.277355	RP11-355B11.2
ENSG00000273542	1551.74	-0.562841	0.224946	-2.50212	0.0123454	0.277586	HIST1H4K
ENSG00000171681	9822.24	0.493197	0.197158	2.50153	0.0123657	0.277776	ATF7IP
ENSG00000131558	5572.77	0.348511	0.139373	2.50057	0.0123994	0.278264	EXOC4
ENSG00000116678	581.189	0.733199	0.293443	2.4986	0.0124684	0.279275	LEPR
ENSG00000183273	10.4363	-2.35565	0.942755	-2.49869	0.0124653	0.279275	CCDC60
ENSG00000157827	4520.43	0.326043	0.130566	2.49715	0.0125196	0.280152	FMNL2
ENSG00000114166	55.1838	-1.16011	0.465094	-2.49435	0.0126188	0.280504	KAT2B
ENSG00000134285	445.875	-0.516084	0.206823	-2.49529	0.0125855	0.280504	FKBP11
ENSG00000037897	455.299	-0.467394	0.187382	-2.49433	0.0126195	0.280504	METTL1
ENSG00000198380	6746.99	0.400349	0.16042	2.49563	0.0125733	0.280504	GFPT1
ENSG00000251603	199.192	0.531676	0.213086	2.49512	0.0125913	0.280504	RP11-164P12.4
ENSG00000272767	24.0029	-1.214	0.486619	-2.49478	0.0126037	0.280504	JMJD1C-AS1
ENSG00000274317	4.91668	-4.76034	1.90726	-2.49591	0.0125636	0.280504	RP11-93G5.1
ENSG00000160113	3790.02	-0.364543	0.146212	-2.49324	0.0126583	0.280565	NR2F6
ENSG00000254851	7.5323	-3.22413	1.2931	-2.49333	0.0126552	0.280565	RP11-109L13.1
ENSG00000276550	1514.96	0.6072	0.243485	2.49379	0.0126388	0.280565	HERC2P2
ENSG00000187372	72.7183	1.08075	0.433719	2.49181	0.0127095	0.281432	PCDHB13
ENSG00000273274	555.869	0.515549	0.206929	2.49144	0.0127228	0.281459	ZBTB8B
ENSG00000080823	43.2634	-0.817556	0.32827	-2.4905	0.0127563	0.281933	MOK
ENSG00000102802	106.145	0.750018	0.301222	2.48992	0.0127771	0.282125	MEDAG
ENSG00000008405	1304.47	0.387457	0.155651	2.48927	0.0128005	0.282266	CRY1
ENSG00000157554	199.999	1.09443	0.439692	2.48907	0.0128077	0.282266	ERG
ENSG00000160097	25.3296	-1.16869	0.469596	-2.48871	0.0128208	0.282288	FNDC5
ENSG00000103342	9502.63	0.295223	0.118684	2.48747	0.0128657	0.282318	GSPT1
ENSG00000166439	2555.9	0.313033	0.125851	2.48733	0.0128706	0.282318	RNF169
ENSG00000166664	22.4406	1.35534	0.544705	2.4882	0.0128391	0.282318	CHRFAM7A
ENSG00000203799	113.545	0.765129	0.307603	2.48739	0.0128683	0.282318	CCDC162P
ENSG00000107731	1554.9	-0.71909	0.289299	-2.48563	0.0129324	0.283406	UNC5B
ENSG00000138798	310.447	0.473933	0.190715	2.48504	0.0129538	0.283608	EGF
ENSG00000150540	121.654	-0.93611	0.376939	-2.48345	0.0130115	0.284339	HNMT
ENSG00000124466	64.3729	0.71397	0.287485	2.48351	0.0130096	0.284339	LYPD3
ENSG00000173214	965.536	0.553691	0.22301	2.48281	0.0130349	0.284583	MFSD4B
ENSG00000182022	553.645	-0.576864	0.232472	-2.48144	0.0130853	0.284587	CHST15
ENSG00000144554	6380.35	-0.29453	0.118679	-2.48174	0.0130742	0.284587	FANCD2
ENSG00000088387	1527.39	0.43255	0.174281	2.48191	0.0130681	0.284587	DOCK9
ENSG00000223865	641.081	0.451367	0.181838	2.48225	0.0130554	0.284587	HLA-DPB1
ENSG00000254577	62.3072	0.696806	0.28084	2.48114	0.0130961	0.284587	RP11-484D2.4
ENSG00000134698	1155.86	0.418882	0.168911	2.4799	0.0131421	0.285321	AGO4
ENSG00000090612	1697.44	-0.77803	0.313818	-2.47924	0.0131662	0.285578	ZNF268
ENSG00000201801	89.6507	-3.49333	1.4098	-2.47788	0.0132164	0.285869	RNU5E-4P
ENSG00000236829	61.3694	-0.763835	0.308243	-2.47803	0.0132109	0.285869	Z97634.3
ENSG00000229692	117.371	0.684767	0.276305	2.4783	0.0132009	0.285869	SOS1-IT1
ENSG00000188257	33.227	-1.73406	0.70007	-2.47698	0.0132498	0.286326	PLA2G2A
ENSG00000200997	60.4563	-1.46593	0.592039	-2.47606	0.013284	0.286799	RNU1-85P
ENSG00000263006	35.2387	1.1344	0.458261	2.47545	0.0133067	0.287024	ROCK1P1
ENSG00000081692	769.727	-0.552206	0.22312	-2.47493	0.0133261	0.287124	JMJD4
ENSG00000164669	7.55381	-2.38278	0.962868	-2.47467	0.013336	0.287124	INTS4P1
ENSG00000181856	388.831	0.562312	0.227355	2.47328	0.013388	0.287712	SLC2A4
ENSG00000226864	30.2001	-1.09557	0.442927	-2.47348	0.0133805	0.287712	ATE1-AS1
ENSG00000214756	402.971	-0.466219	0.188545	-2.47273	0.0134086	0.28789	METTL12
ENSG00000132967	372.652	-1.07223	0.433694	-2.47232	0.013424	0.287955	HMGB1P5
ENSG00000122965	2453.58	-0.452714	0.183144	-2.47191	0.0134394	0.288021	RBM19
ENSG00000127220	460.739	-0.583921	0.236283	-2.47127	0.0134632	0.288166	ABHD8
ENSG00000128191	1910.24	-0.414544	0.167845	-2.4698	0.0135188	0.288166	DGCR8
ENSG00000167588	12.1425	-1.51488	0.613372	-2.46976	0.0135203	0.288166	GPD1
ENSG00000240875	19.6403	-1.39295	0.56371	-2.47103	0.0134723	0.288166	LINC00886
ENSG00000260492	5.29679	-3.91307	1.58414	-2.47015	0.0135055	0.288166	CISTR
[truncated: 29,394 more rows]
